# Supplementary material for: Hydroamination of alkenes with dinitrogen in a trititanium polyhydride framework
Source: Research Square preprint supplement (doi:10.21203/rs.3.rs-3485391/v1), 2023-11-07
Supplement: Supplementary file 1 [file 25b05a6a60369dd436a52c86.docx]

Supplementary Information for

**Hydroamination of alkenes with dinitrogen in a trititanium polyhydride framework**

Takanori Shima,*,1,2,4 Qingde Zhuo,2,4 Xiaoxi Zhou,2 Ping Wu,3 Ryota Owada,2 Gen Luo,*,3 and Zhaomin Hou*,1,2

1Advanced Catalysis Research Group, RIKEN Center for Sustainable Resource Science, Wako 351-0198, Japan

2Organometallic Chemistry Laboratory, RIKEN Cluster for Pioneering Research, Wako, 351-0198, Japan

3Institutes of Physical Science and Information Technology, Anhui University, Hefei 230601, China

4These authors contributed equally: Takanori Shima, Qingde Zhuo

**This file includes the following materials:**

General procedure

Supplementary Text

Figures S1 to S85

Tables S1 to S4

General Procedures

All reactions were carried out under a dry and oxygen free argon atmosphere by using Schlenk techniques or under a nitrogen or argon atmosphere in an Mbraun glovebox. The argon was purified by being passed through a Dryclean column (4A molecular sieves, Nikka Seiko Co.) and a Gasclean GC-XR column (Nikka Seiko Co.). The nitrogen and the argon in the glovebox were constantly circulated through a copper/molecular sieves catalyst unit. The oxygen and moisture concentrations in the glovebox atmosphere were monitored by an O2/H2O Combi-Analyzer (Mbraun) to ensure both were always below 1 ppm. Samples for NMR spectroscopic measurements were prepared by using Schlenk techniques or in the glovebox by use of J. Young valve NMR tubes. 1H, 13C, and 15N NMR spectra were recorded on a JEOL JNM-ECS400 or Bruker-AVANCE500HD spectrometer. Elemental analyses were performed by a MICRO CORDER JM10. High-resolution MS were recorded on a JEOL JMS-700V (EI). Field desorption (FD) mass spectra were acquired on a JEOL JMS-T100GCV time of flight mass spectrometer equipped with an EI/FI(FD) combination ion source. Anhydrous THF, hexane, benzene, Et2O, and toluene were purified by use of a SPS-800 solvent purification system (Mbraun), and dried over fresh Na chips or activated molecular sieves in the glovebox. NMR solvents were dried with activated 3 Å molecular sieves. [(C5Me4SiMe3)3Ti3(*μ*3-H)(*μ*2-H)6] (**1**), [(C5Me4SiMe3)3Ti3(*m*3-N)(*m*-NH)(*m*-H)2] (**2**)[[1]](#endnote-1) TiCl3(THF)3,[[2]](#endnote-2) and [C5Me4SiMe2*t*Bu]Li (Cp”Li)[[3]](#endnote-3) were prepared according to literature procedures. 15N2 (99.9%), D2 (99.96%) were purchased from SHOKO science. Hydrogen (>99.99999%) was purchased from TAIYO NIPPON SANSO and used as received. Other chemicals were purchased from common commercial sources and used as received.

**[{(C5Me4SiMe3)Ti}3(*μ*-*η*2,*η*1,*η*1-CH=CH-CH2-)(*μ*3-N)(*μ*-NH)] (3). a**) Propylene (1 atm) was introduced to a hexane solution (4 mL) of **2** (61.2 mg, 0.081 mmol) at room temperature. The mixture was heated at 70 ºC and stirred for 2 days. After removal of the solvent under vacuum, the residual solid was recrystallized from DME at –33 ºC to afford **3** (38 mg, 0.048 mmol, 59%) as dark brown block crystals. **b)** A benzene solution (0.5 mL) of **5** (14 mg, 0.018 mmol) in J-Young NMR tube was kept at 70 °C for 1 day. The color of the solution changed from dark purple to brown purple. After the reaction, the solution was evaporated and the residue was crystallized in DME at –30 °C to give **3** (12 mg, 0.015 mmol, 83%) as dark brown solid. The 15N-enriched compound [{(C5Me4SiMe3)Ti}3(*μ*-*η*3,*η*3,*η*1-CH=CH-CH2-)(*μ*3-15N)(*μ*-15NH)] (**3-15N**) was obtained from the reaction of [{(C5Me4SiMe3)Ti}3(*m*3-15N)(*m*-15NH)(*m*-H)2] (**2-15N**) (6 mg, 0.008 mmol) with propylene (1 atm) in C6D6 (0.4 mL) at 70 °C for 16 h.

**3**: 1H NMR (C6D6, rt): *δ* 15.00 (s, 1H, N*H*), 7.72 (d, *J* = 9.8 Hz, 1H, -C*H*=CH-CH2-), 5.21 (t, *J* = 5.8 Hz, 1H, -CH=CH-C*H*2-), 4.01 (ddd, *J* = 9.8, 5.8, 2.4 Hz, 1H, -CH=C*H*-CH2-), 2.48 (s, 3H, C5*Me4*SiMe3), 2.48 (-CH=CH-C*H*2-, obscured by Cp’), 2.44 (s, 3H, C5*Me4*SiMe3), 2.34 (s, 3H, C5*Me4*SiMe3), 2.25 (s, 3H, C5*Me4*SiMe3), 2.21 (s, 3H, C5*Me4*SiMe3), 2.16 (s, 3H, C5*Me4*SiMe3), 2.00 (s, 3H, C5*Me4*SiMe3), 1.96 (s, 3H, C5*Me4*SiMe3), 1.91 (s, 3H, C5*Me4*SiMe3), 1.84 (s, 3H, C5*Me4*SiMe3), 1.53 (s, 3H, C5*Me4*SiMe3), 1.26 (s, 3H, C5*Me4*SiMe3), 0.36 (s, 9H, C5Me4Si*Me3*), 0.32 (s, 9H, C5Me4Si*Me3*), 0.23 (s, 9H, C5Me4Si*Me3*). 13C{1H} NMR (C6D6, rt): *δ* 223.6 (s, -*C*H=CH-CH2-), 140.1 (s, -CH=*C*H-CH2-), 136.3 (s, -CH=CH-*C*H2-),128.6 (s, *C5*Me4SiMe3), 128.5 (s, *C5*Me4SiMe3), 127.7 (s, *C5*Me4SiMe3), 126.0 (s, *C5*Me4SiMe3), 124.8 (s, *C5*Me4SiMe3), 124.17 (s, *C5*Me4SiMe3), 124.15 (s, *C5*Me4SiMe3), 123.8 (s, *C5*Me4SiMe3), 123.4 (s, *C5*Me4SiMe3), 123.3 (s, *C5*Me4SiMe3), 122.1 (s, *C5*Me4SiMe3), 120.9 (s, *C5*Me4SiMe3), 116.3 (s, *C5*Me4SiMe3), 115.5 (s, *C5*Me4SiMe3), 112.9 (s, *C5*Me4SiMe3), 16.0 (s, C5*Me4*SiMe3), 15.49 (s, C5*Me4*SiMe3), 15.46 (s, C5*Me4*SiMe3), 15.0 (s, C5*Me4*SiMe3), 12.5 (s, C5*Me4*SiMe3), 12.3 (s, C5*Me4*SiMe3), 12.1 (s, C5*Me4*SiMe3), 12.0 (s, C5*Me4*SiMe3), 11.8 (s, C5*Me4*SiMe3), 11.2 (s, C5*Me4*SiMe3), 2.62 (s, C5Me4Si*Me3*), 2.56 (s, C5Me4Si*Me3*). 13C NMR (C6D6, non-decoupling, rt): *δ* 223.6 (d, *J*CH = 134.7 Hz, -*C*H=CH-CH2-), 140.1 (d, *J*CH = 154.0 Hz, -CH=*C*H-CH2-), 136.3 (dd, *J*CH = 123.0, 70.0 Hz, -CH=CH-*C*H2-). 1H-1H COSY (C6D6, rt): *d*H 7.72-4.01; *d*H 5.21-4.01, 2.48; *d*H 4.01-7.72, 5.21. 1H-13C HMQC (C6D6, rt): *d*H 7.72-*d*C 223.6; *d*H 4.01-*d*C 140.1; *d*H 5.21, 2.48-*d*C 136.3. Anal. calcd. for C41H70N2Si3Ti3: C, 60.14; H, 8.62; N, 3.42. Found: C, 61.18; H, 8.63; N, 3.16.

**3-15N**: 1H NMR (C6D6, rt): *d* 14.98 (d, *J*NH = 66.0 Hz, 15N-*H*). 15N NMR (C6D6, rt): *d* 499.4 (s, *m*3-15*N*), 97.6 (s, *m*-15*N*H).


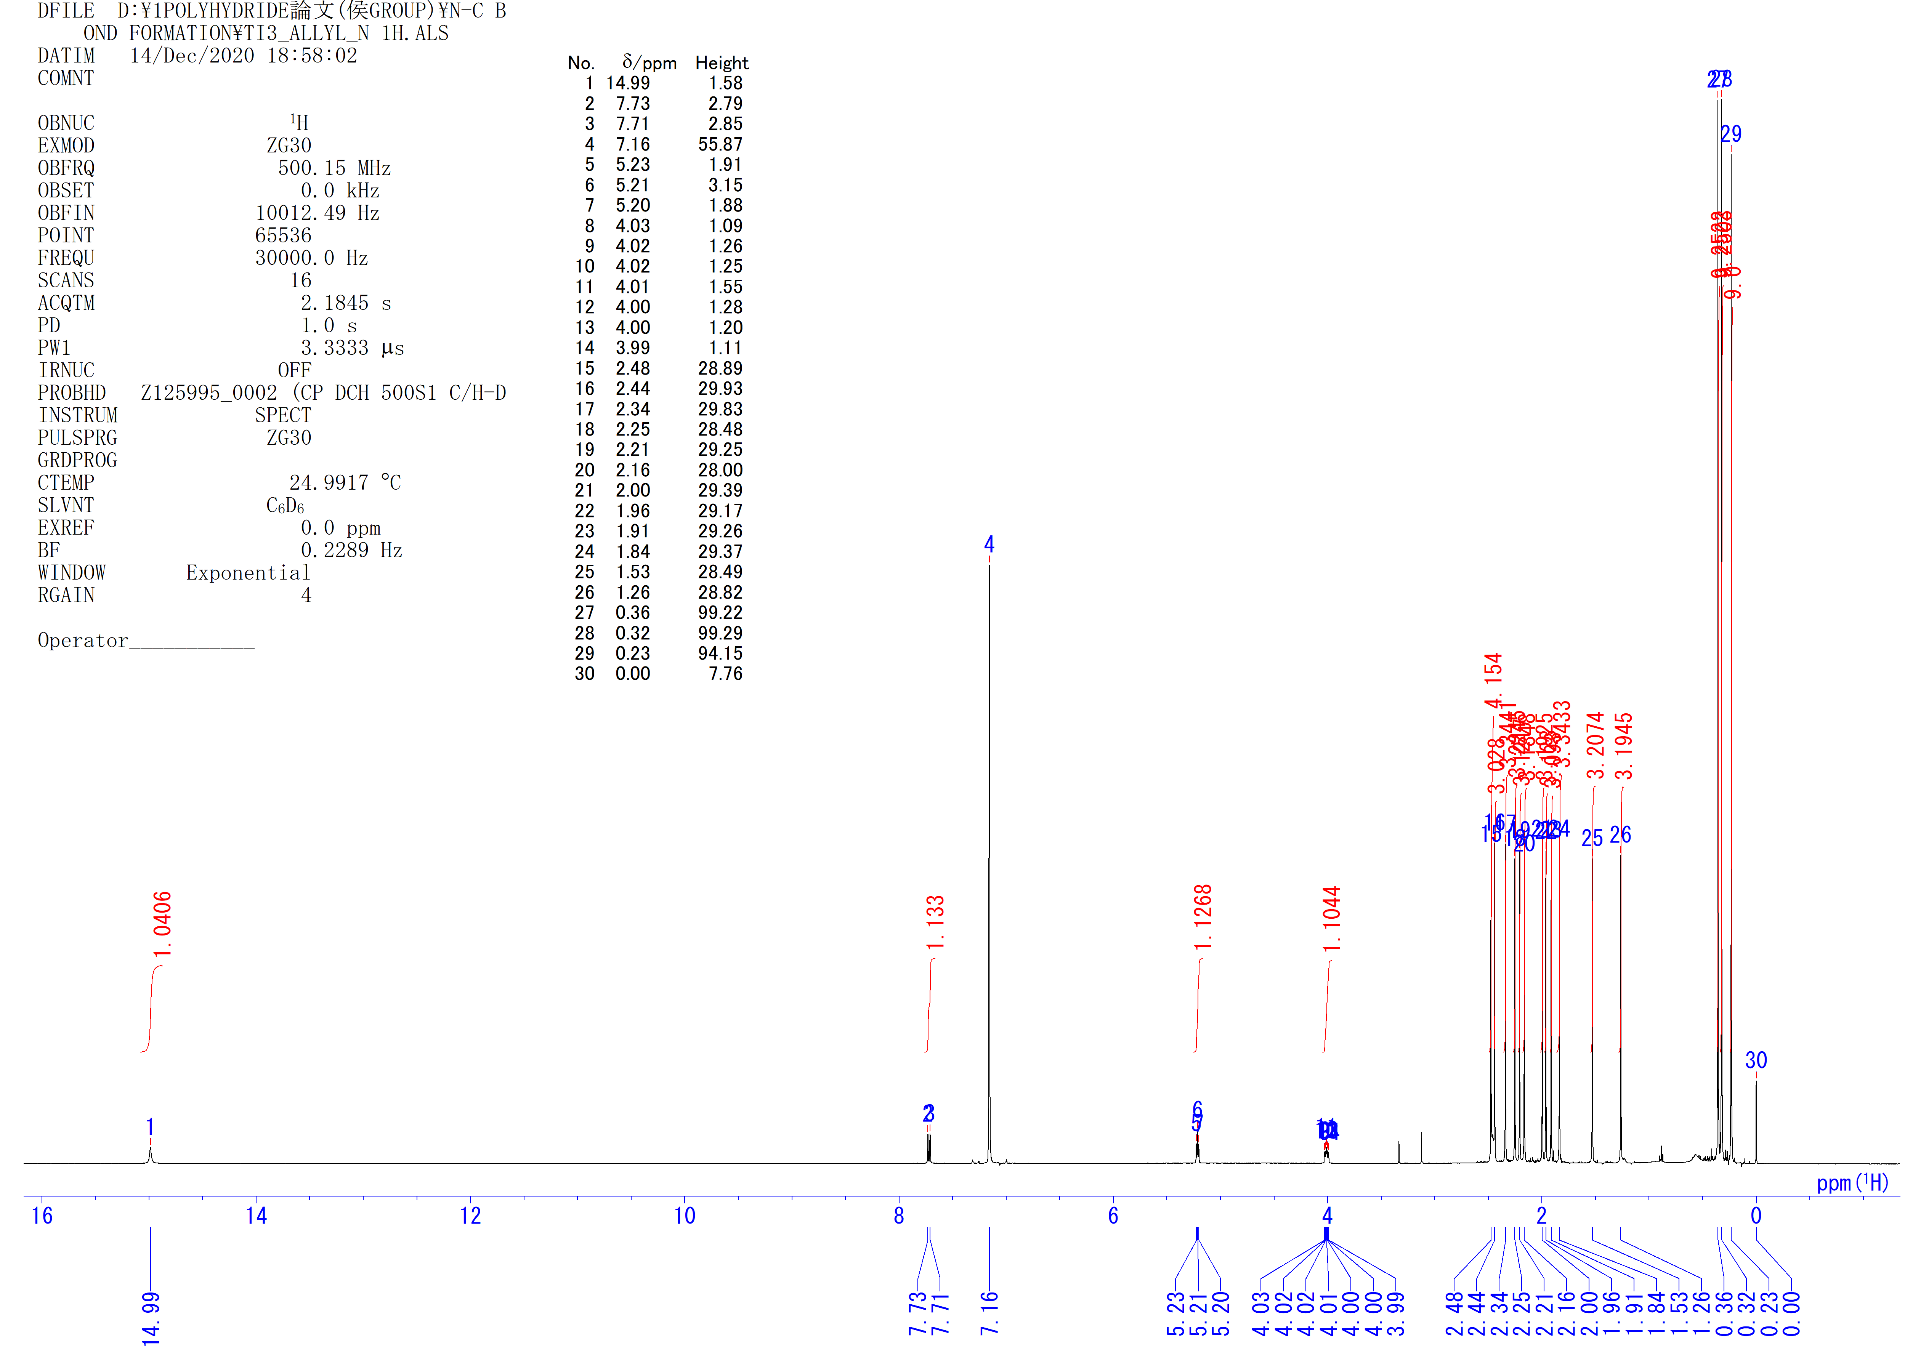


**Figure S1.** 1H NMR spectrum of **3** (C6D6, rt)


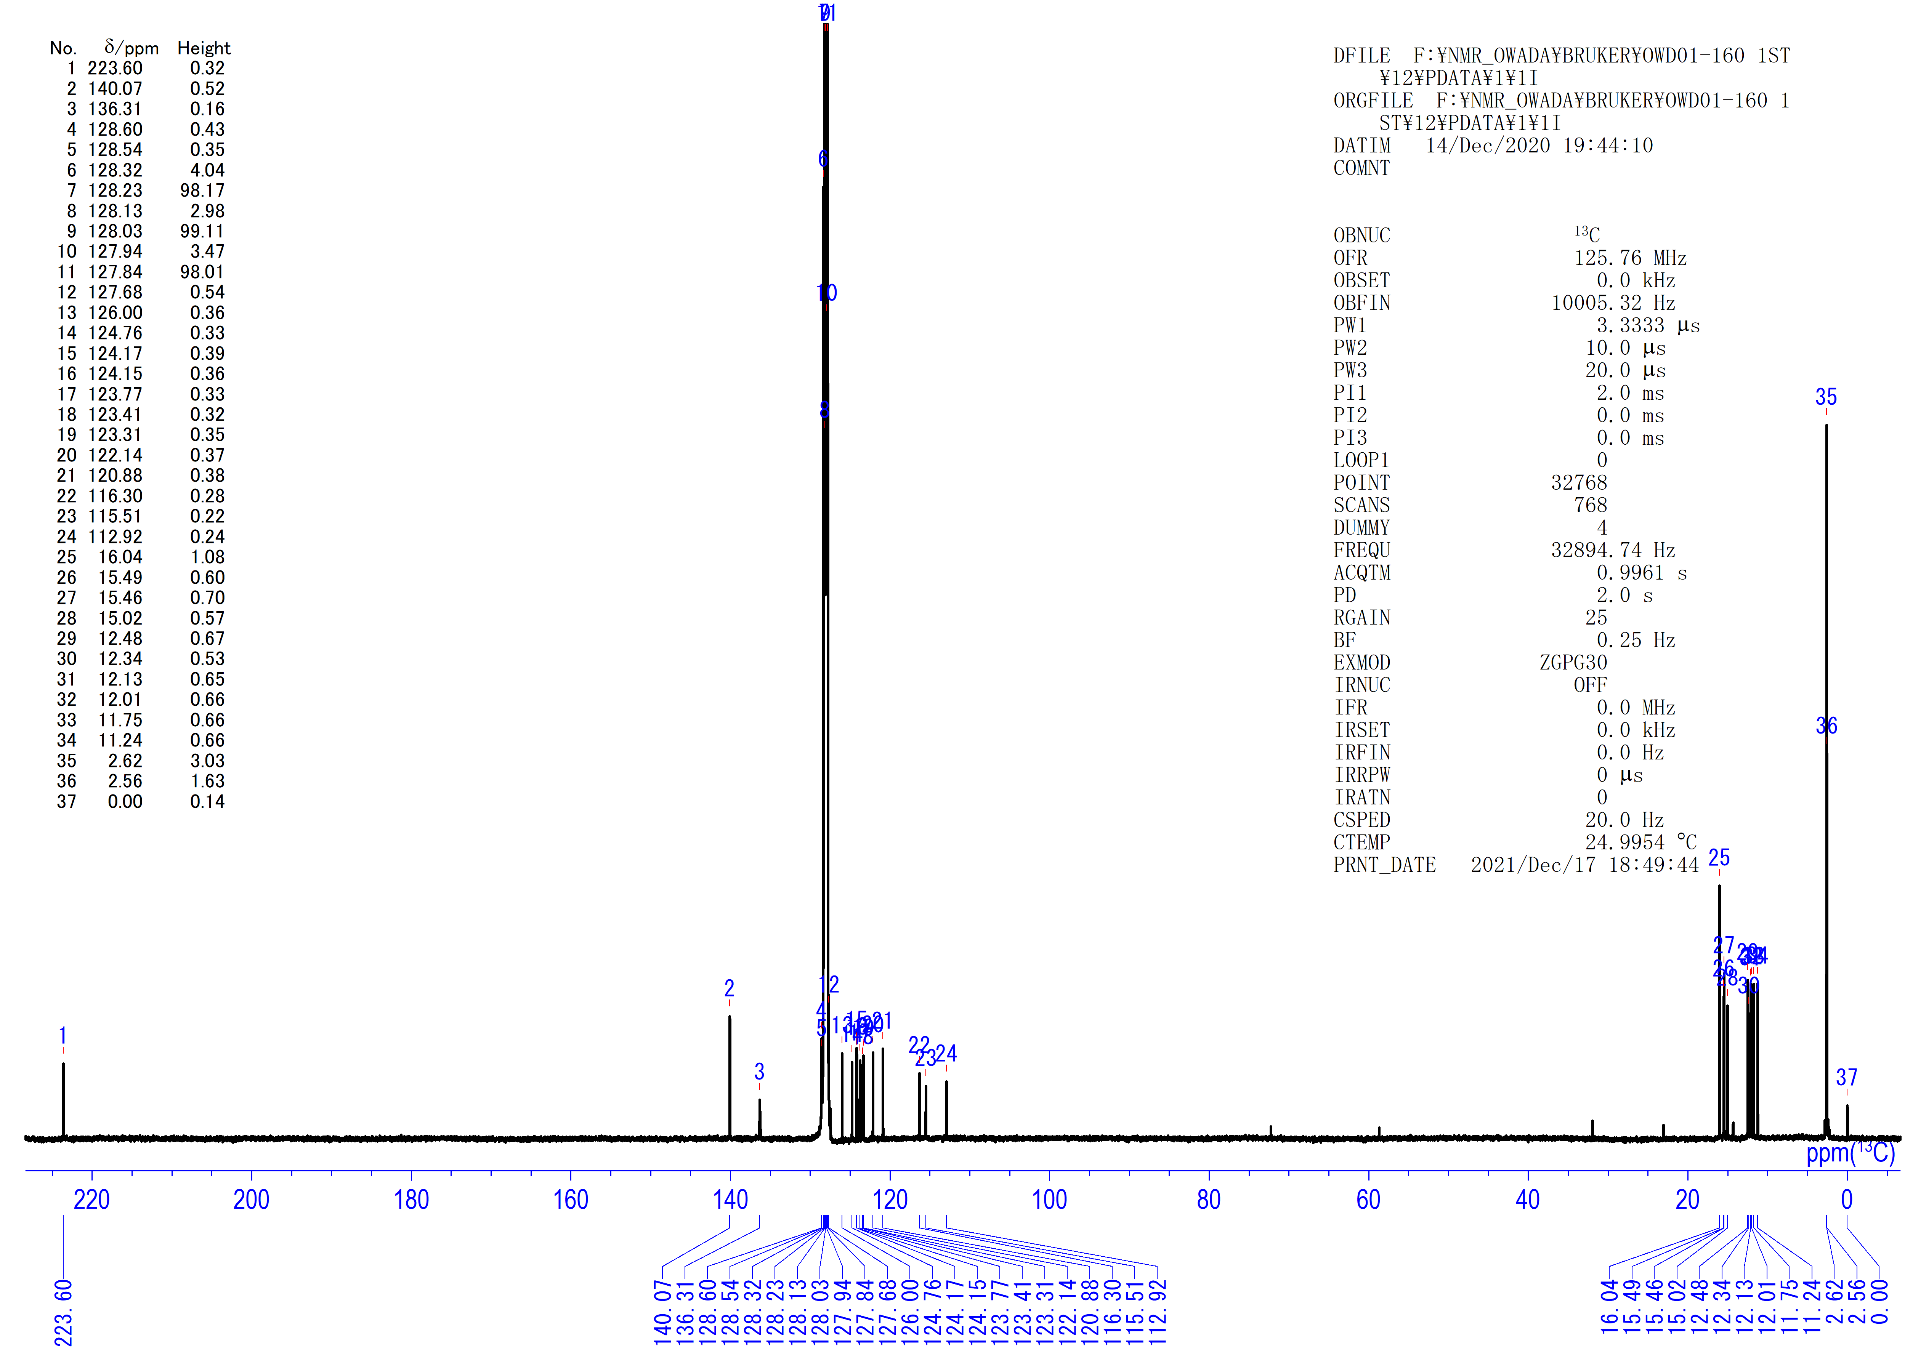


**Figure S2.** 13C{1H} NMR spectrum of **3** (C6D6, rt).


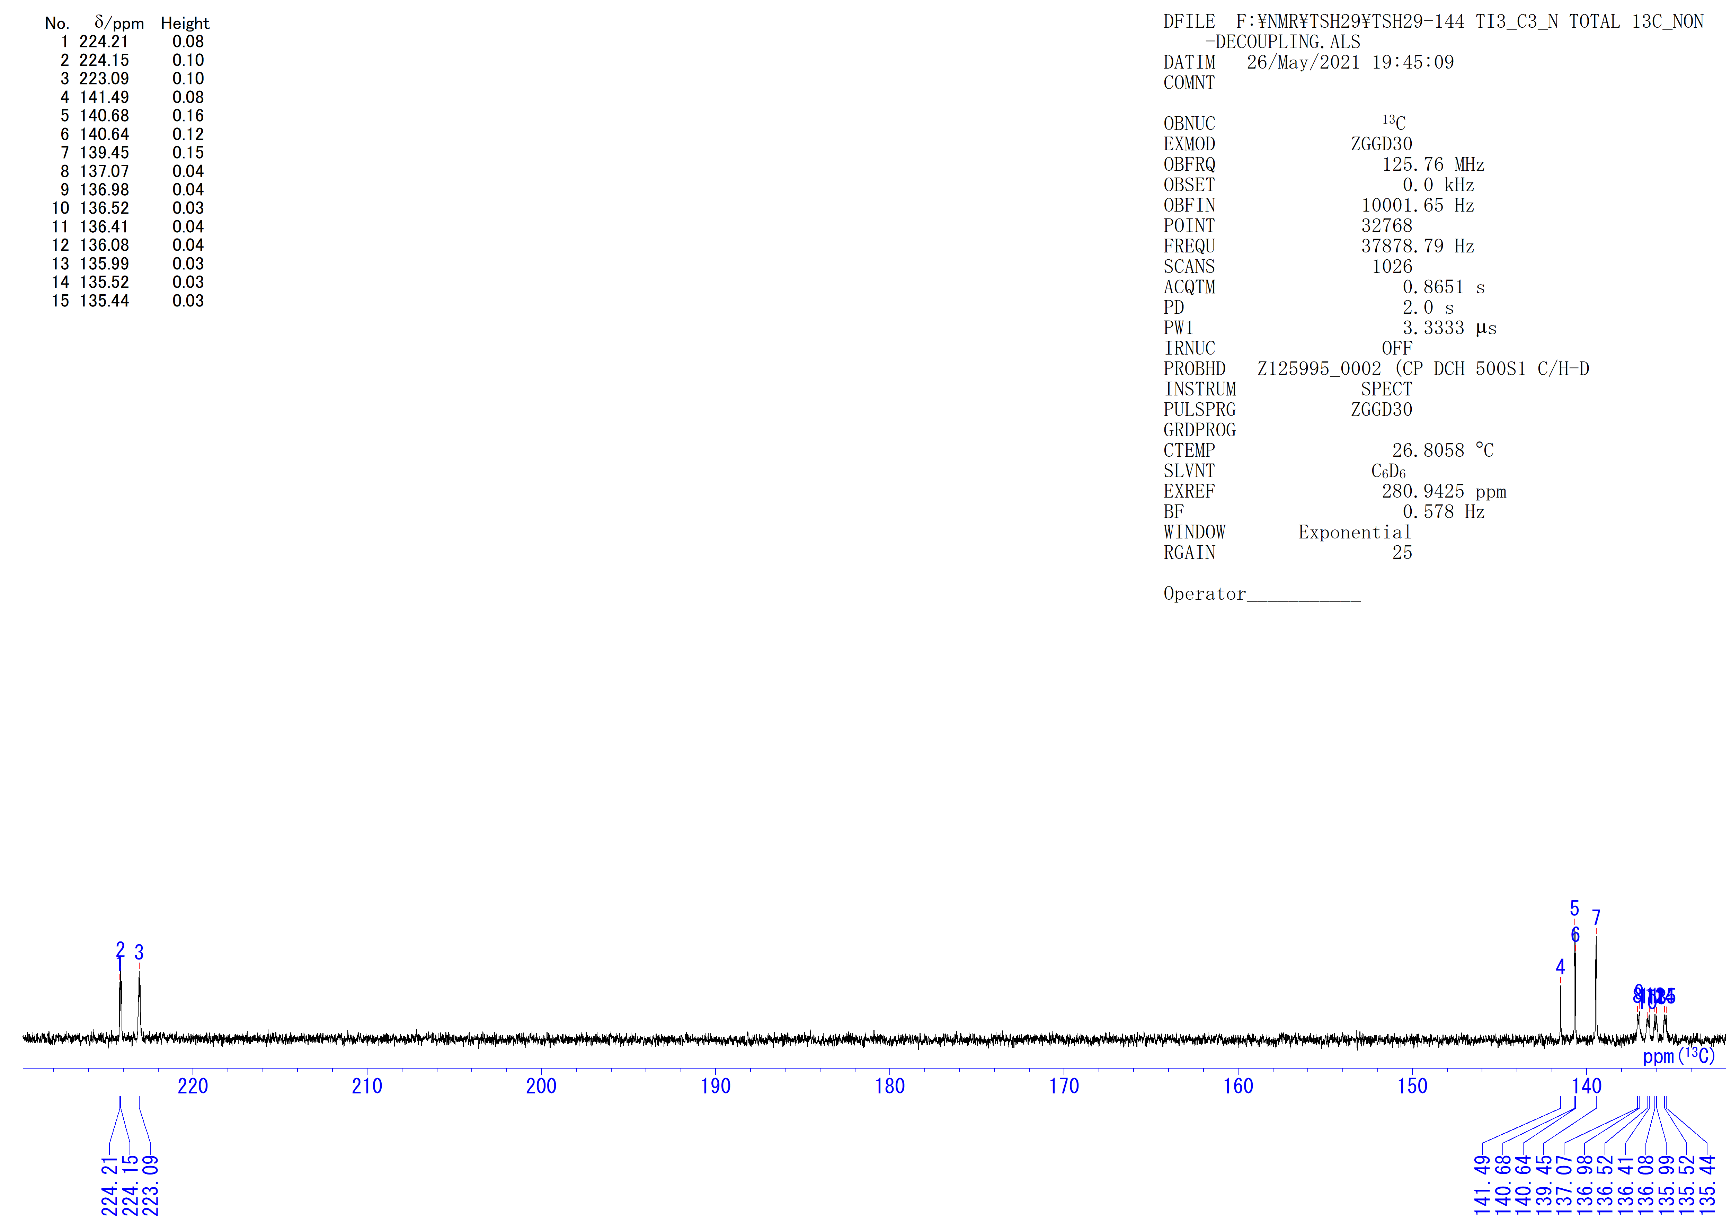


**Figure S3.** 13C{1H non decoupling} NMR spectrum of **3** (C6D6, rt).


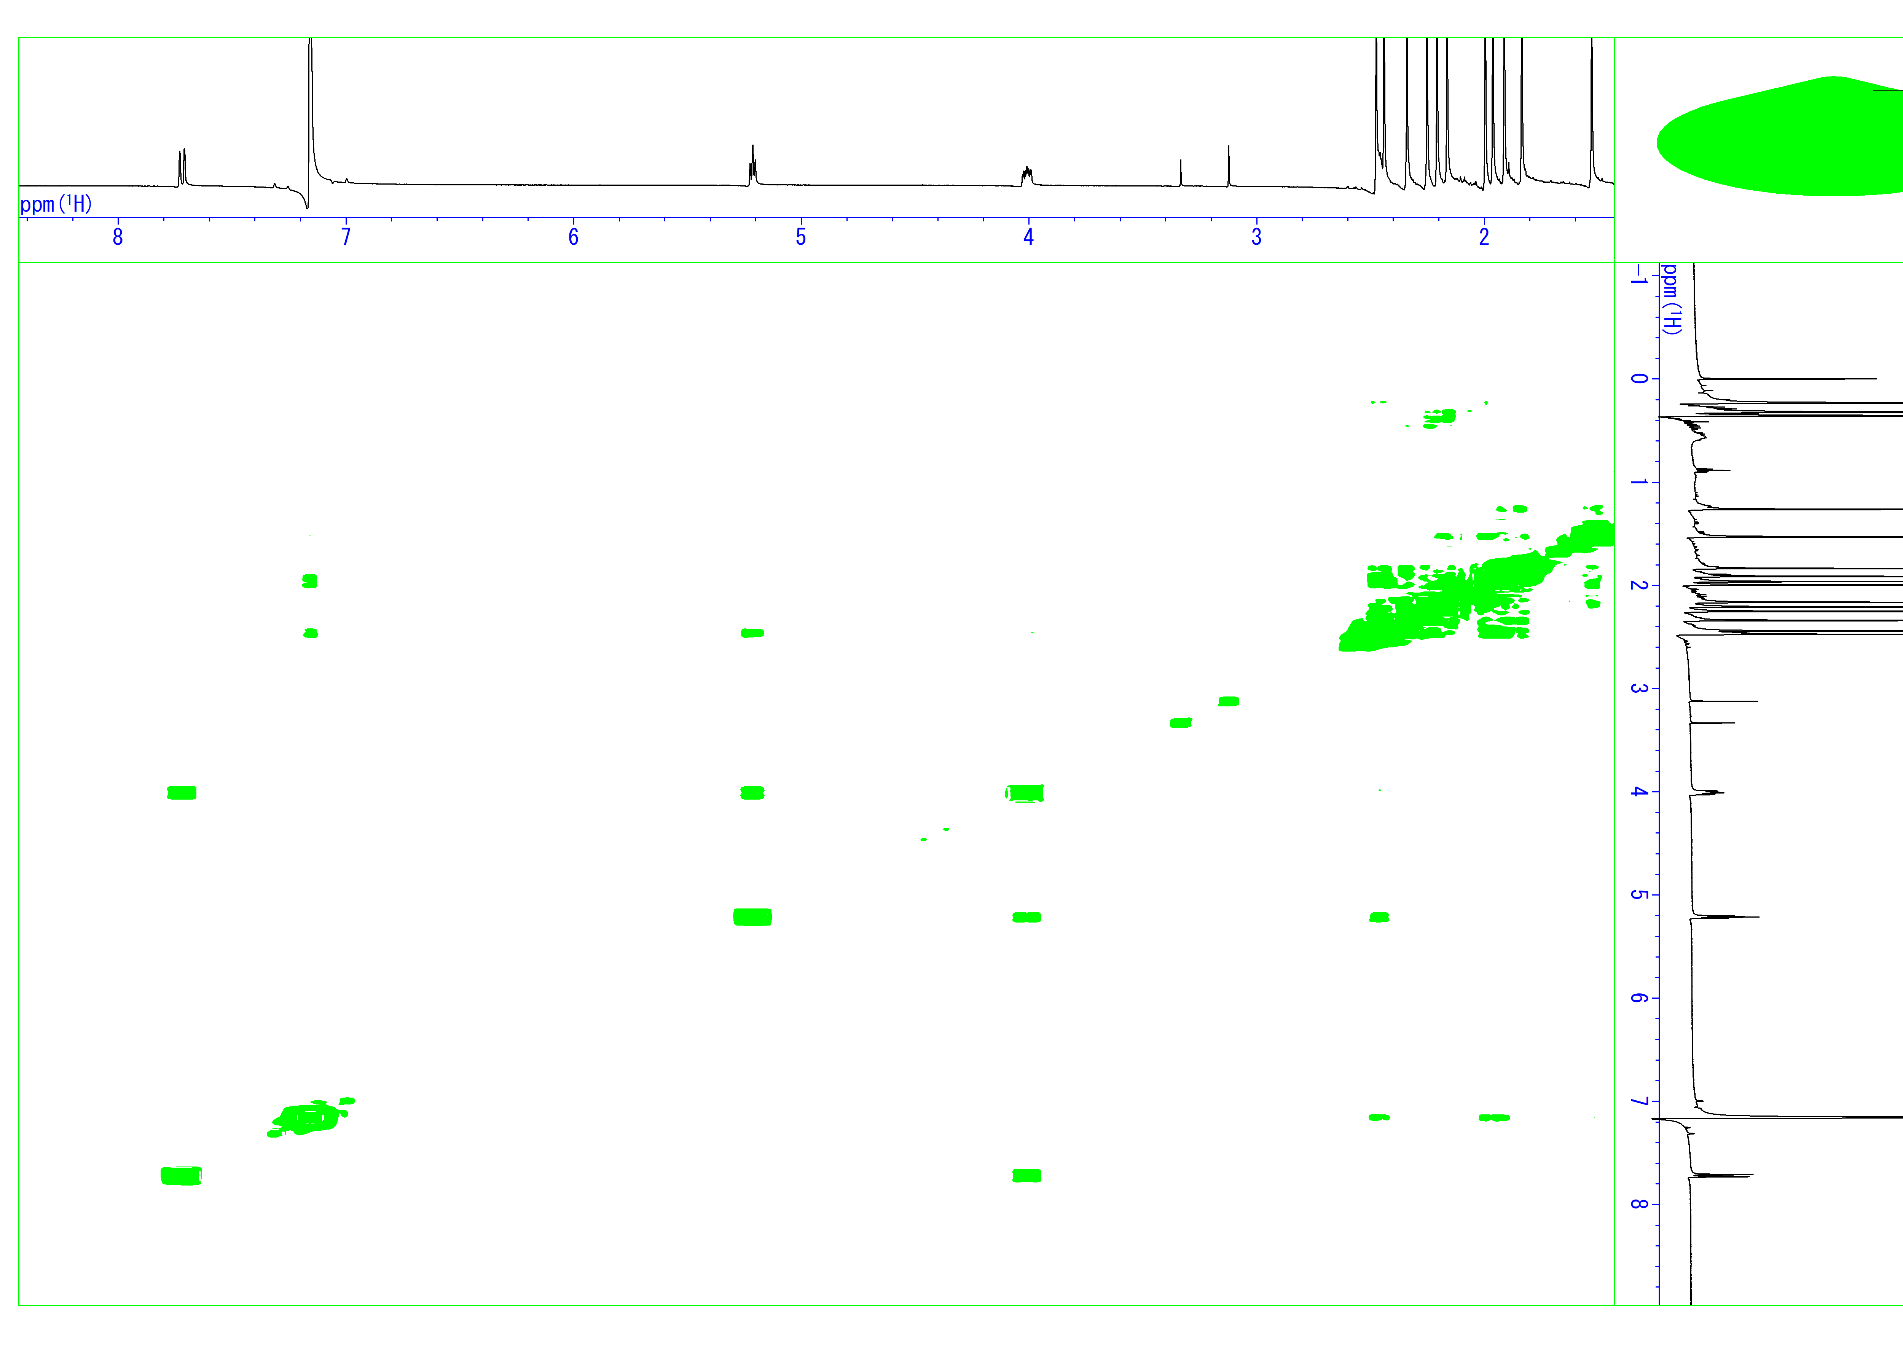


**Figure S4.** 1H-1H COSY spectrum of **3** (C6D6, rt).


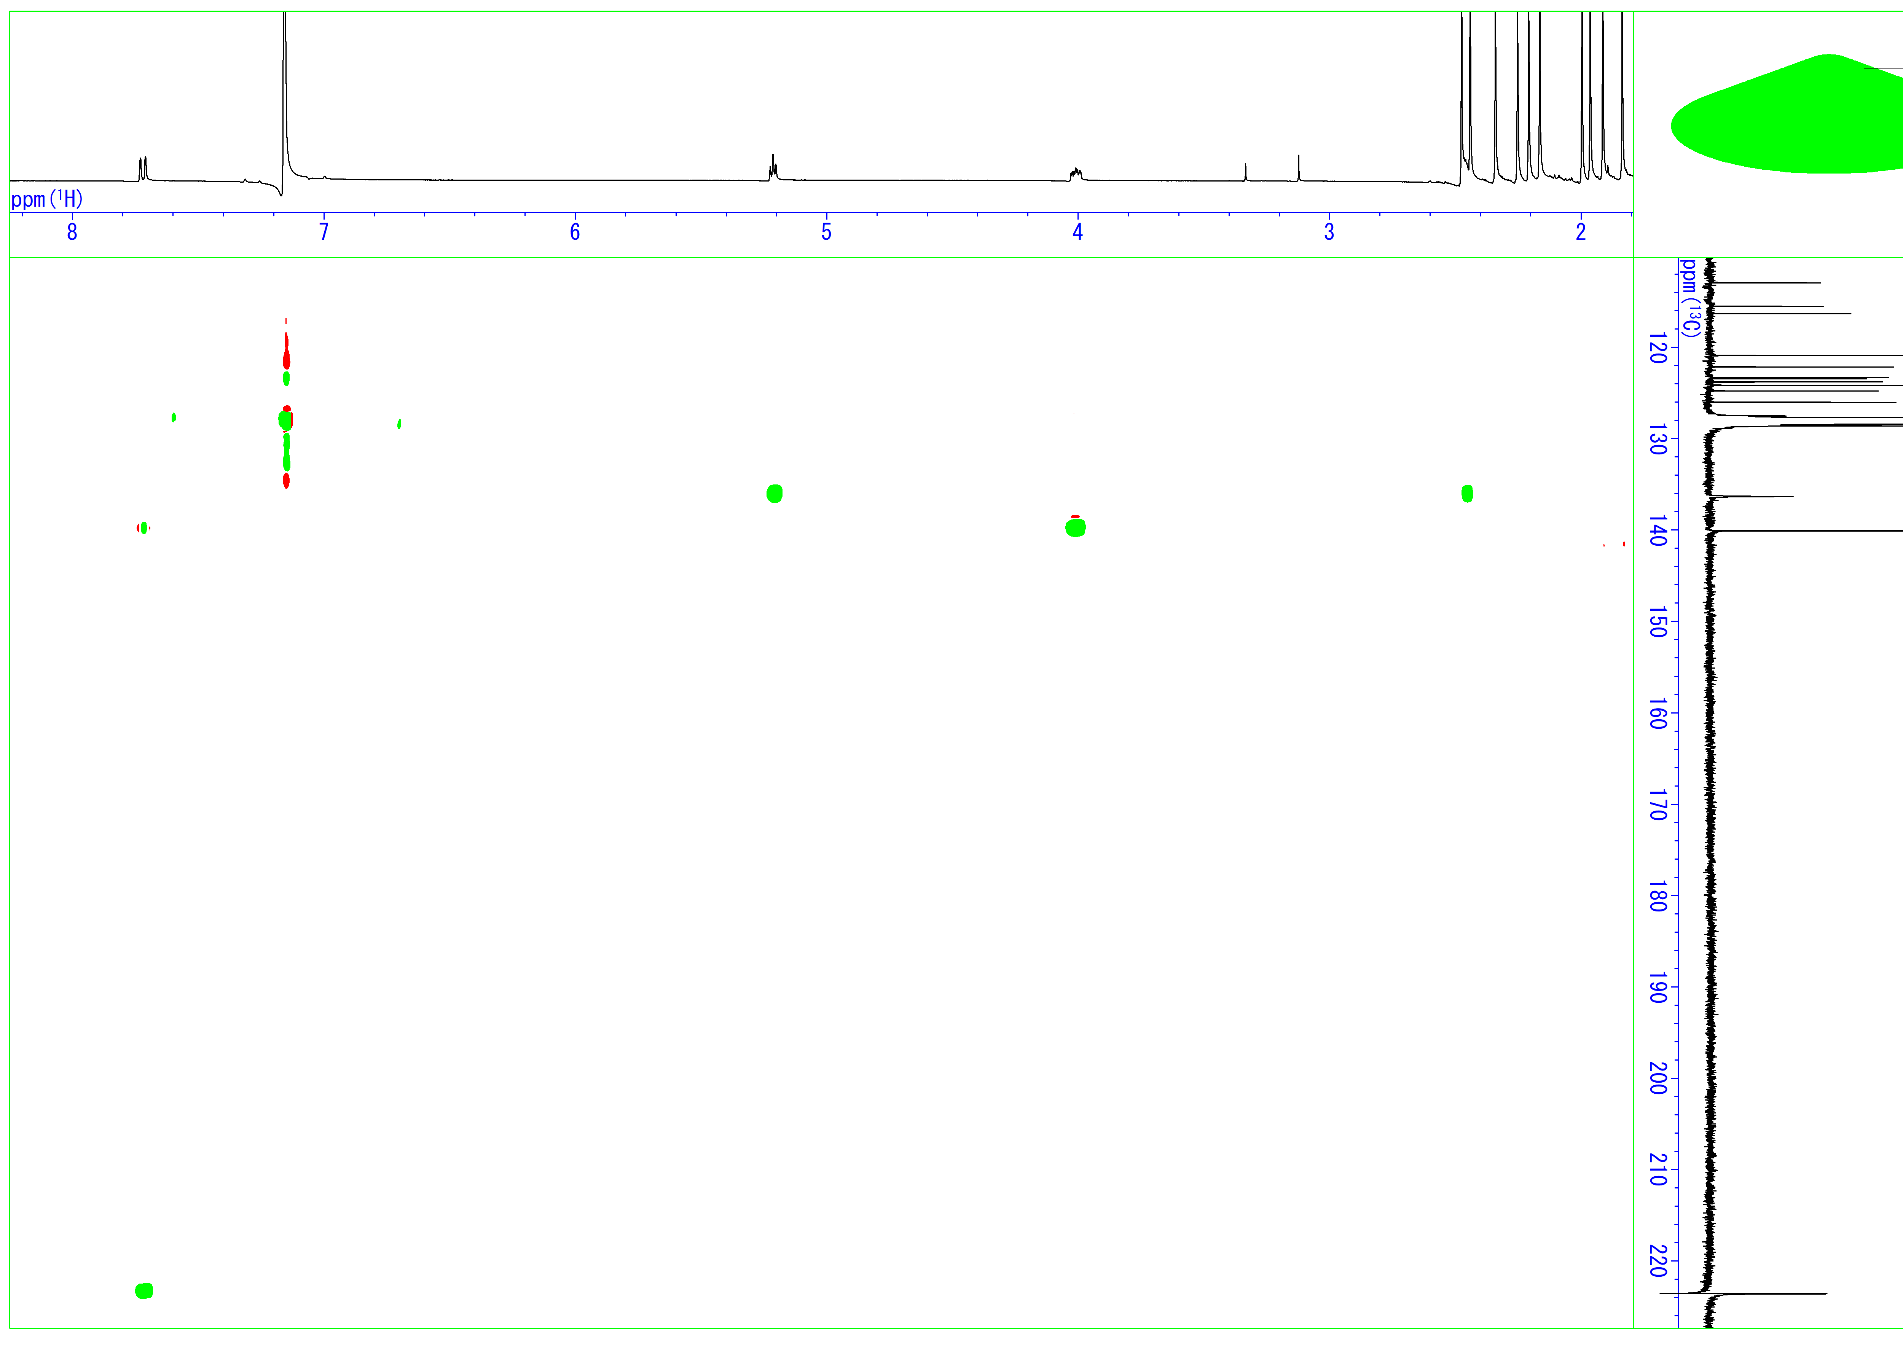


**Figure S5.** 13C-1H HMQC spectrum of **3** (C6D6, rt).


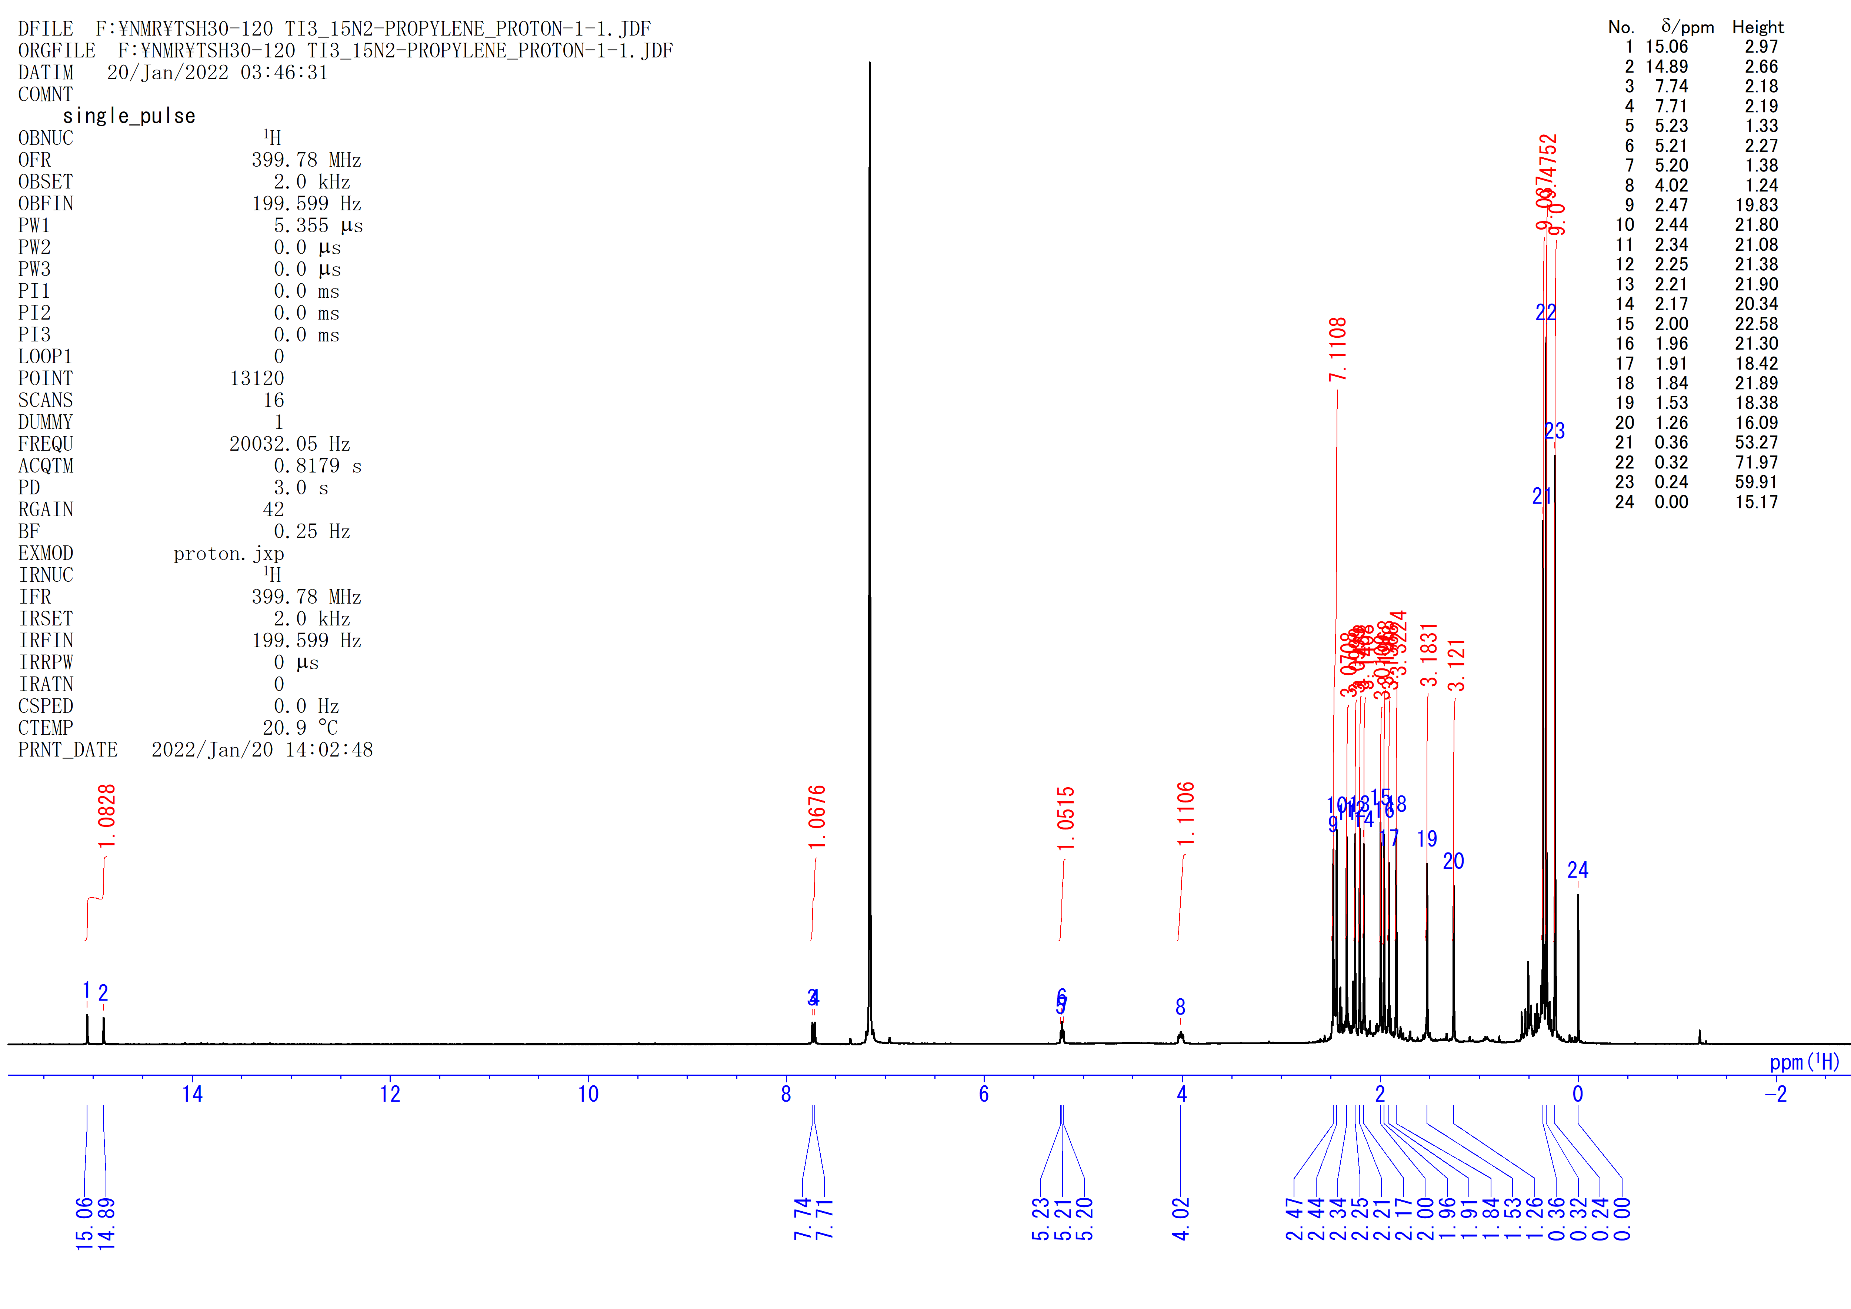


**Figure S6.** 1H NMR spectrum of **3-15N** (C6D6, rt).


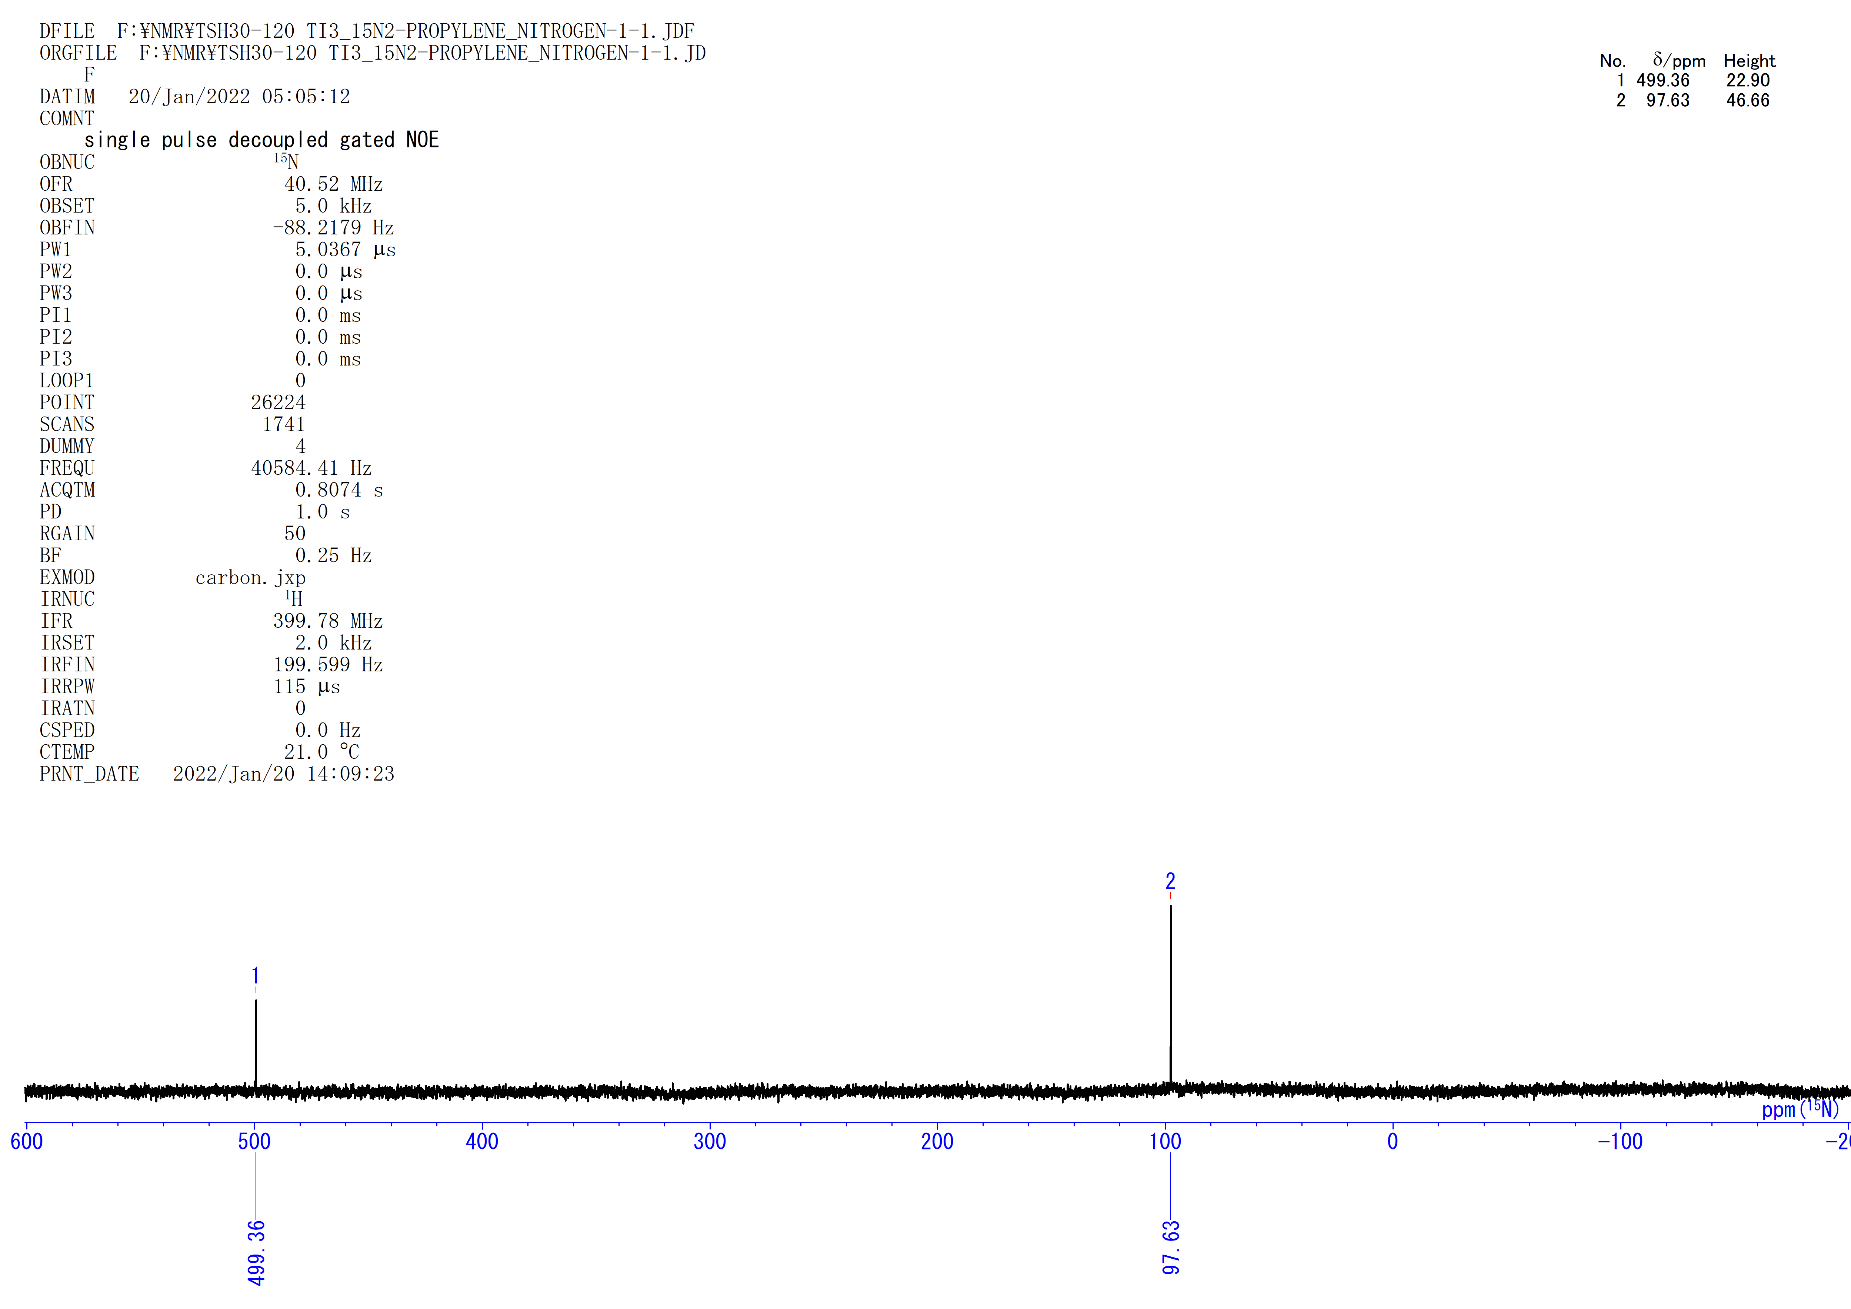


**Figure S7.** 15N NMR spectrum of **3-15N** (C6D6, rt).

**[{(C5Me4SiMe3)Ti}3(*μ*3-*η*2,*η*2,*η*1-C=CCH3)(*μ*-H)3(*μ*3-H)] (4a).** A hexane solution (3.0 mL) of **1** (75 mg, 0.10 mmol) in 50 mL Schlenk tube equipped with a J. Young valve was frozen in liquid nitrogen, pumped, and backfilled with atmospheric pressure of propylene. The solution was stirred at room temperature for 1 h. The solution turned from brown to dark red-brown. After removal of the solvent under vacuum, the resulting solid was dissolved in dimethoxyethane (DME), concentrated and crystallized at –30 °C to give dark brown crystals of **4a** (65 mg, 0.085 mmol, 85%). Single crystals of **4a** suitable for X-ray diffraction studies were obtained by recrystallization from a hexane solution at –30 °C.

**4a**: 1H NMR (C6D6, rt): *δ* 6.43 (q, *J*HH = 14.5 Hz, 1H, *μ*3-H), 2.29 (s, 18H, C5*Me4*SiMe3), 1.91 (s, 18H, C5*Me4*SiMe3), 1.74 (s, 3H, *μ*3-C=CC*H3*), 0.39 (s, 27H, C5Me4Si*Me3*), –2.30 (d, *J*HH = 14.5 Hz, 3H, *μ*-H). 13C{1H} NMR (C6D6, rt): *δ* 338.3 (s, *μ*3-*C*=CCH3), 247.0 (s, *μ*3-C=*C*CH3), 128.7 (s, *C5*Me4SiMe3), 124.5 (s, *C5*Me4SiMe3), 116.2 (s, *C5*Me4SiMe3), 23.3 (s, μ3-C=C*C*H3), 16.5 (s, C5*Me4*SiMe3), 12.4 (s, C5*Me4*SiMe3), 2.9 (s, C5Me4Si*Me3*). Anal. calcd. for C39H70Si3Ti3: C, 61.08; H, 9.20. Found: C, 62.03; H, 9.18.


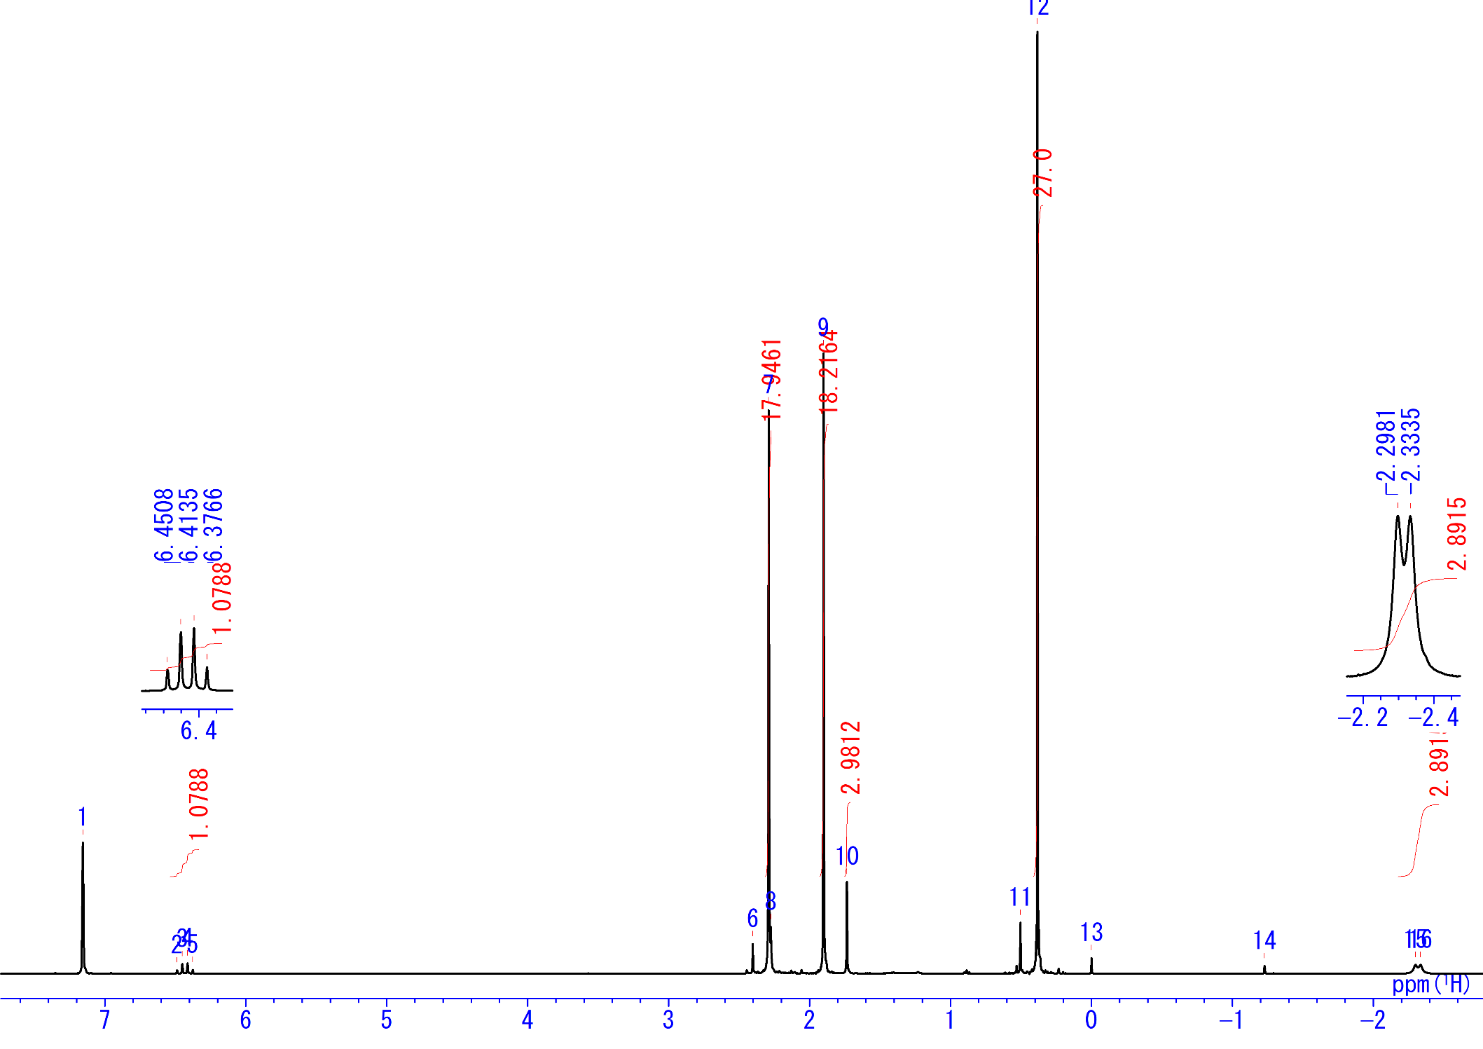


**Figure S8.** 1H NMR spectrum of **4a** (C6D6, rt)


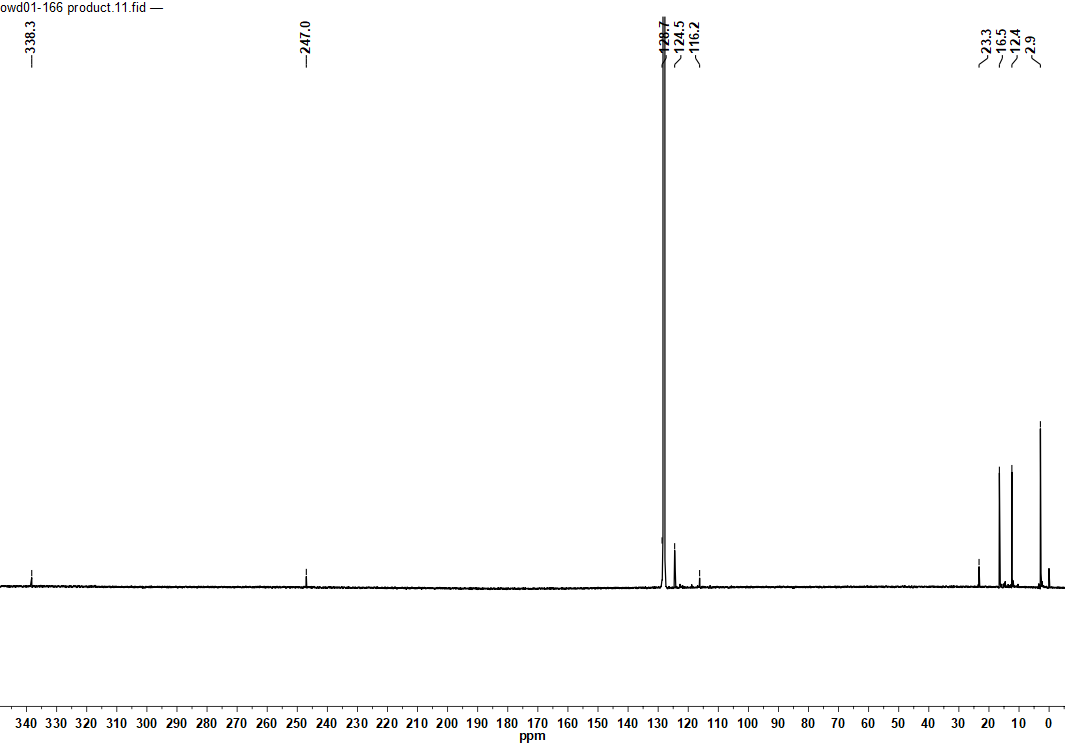


**Figure S9.** 13C{1H} NMR spectrum of **4a** (C6D6, rt)

**1H NMR monitoring the reaction of 1 with propylene in THF-*d*8.** A J. Young valve NMR sample tube was charged with 0.4 mL of THF-*d*8 and complex **1** (4 mg). The solution was frozen in liquid nitrogen, degassed and 1 atm of propylene gas was added. The reaction was monitored by 1H NMR at –20 °C to room temperature. An intermediate species was observed during the reaction. After 1h at room temperature, the intermediate species was disappeared and complex **4a** was formed quantitatively.


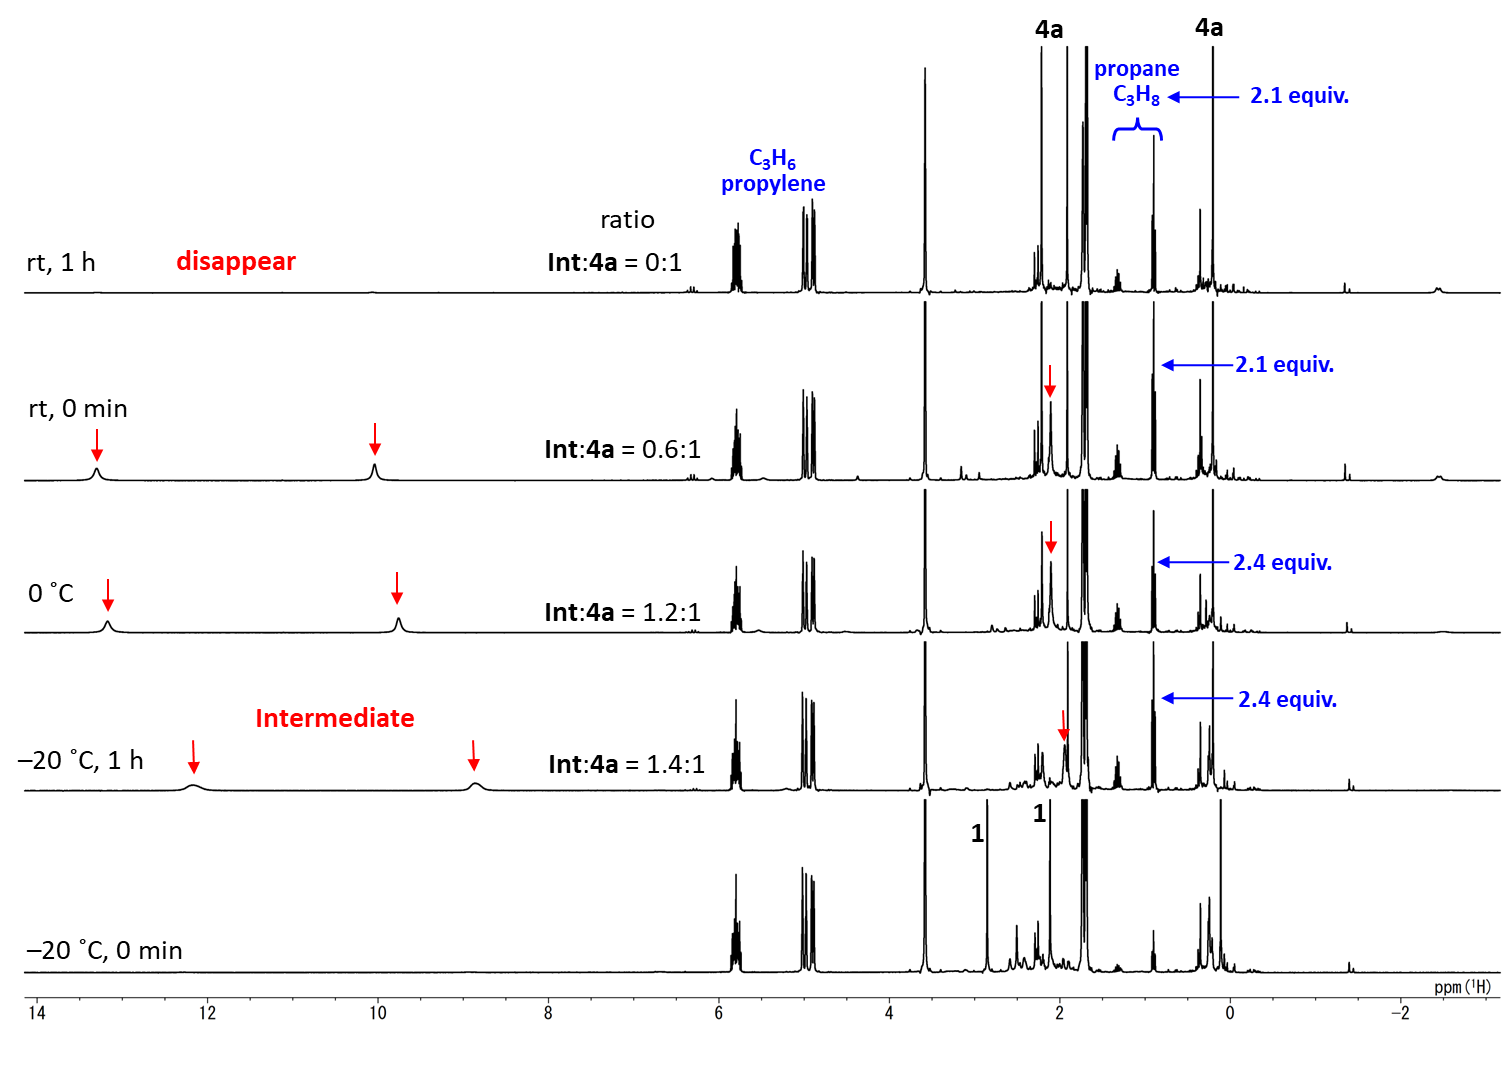


**Figure S10.** 1H NMR monitoring the reaction of **1** with propylene (1 atm) (THF-*d*8, –20 °C~rt).


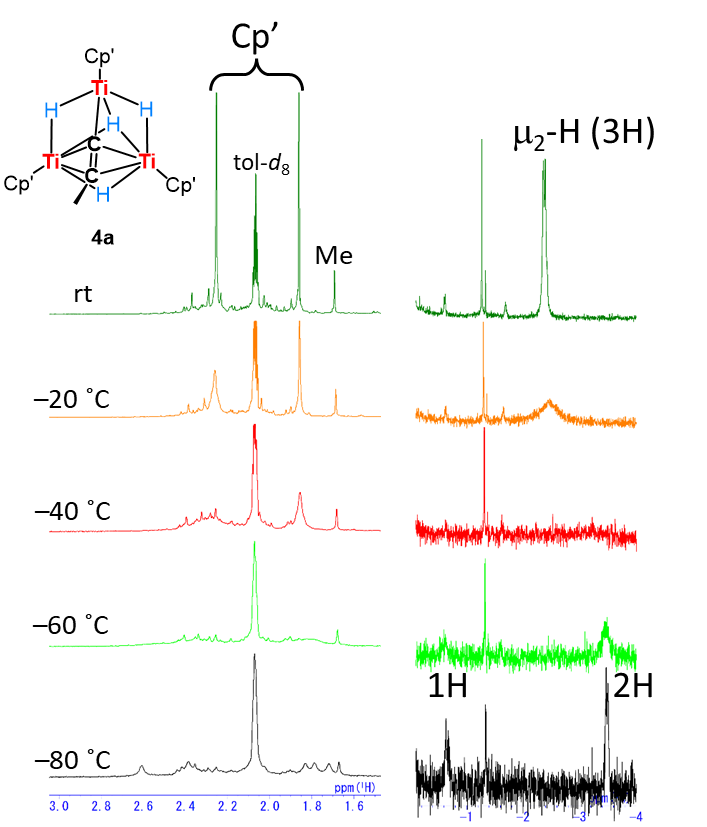


**Figure S11.** VT-1H NMR spectra of **4a** (toluene-*d*8), and plausible dynamic behavior (right).

**[{(C5Me4SiMe3)Ti}3(*μ*3-*η*2,*η*2,*η*1-C=CCH2CH3)(*μ*-H)3(*μ*3-H)] (4b).** A hexane solution (4.0 mL) of **1** (115 mg, 0.157 mmol) in 50 mL Schlenk tube equipped with a J. Young valve was frozen in liquid nitrogen, pumped, and backfilled with atmospheric pressure of 1-butene. The solution was stirred at room temperature for 1 h. The solution turned from brown to dark red-brown. After removal of the solvent under vacuum, the resulting solid was dissolved in pentane (1st batch) / DME (2nd batch), concentrated and crystallized at –30 °C to give dark brown crystals of **4b** (81 mg, 0.104 mmol, 66%).

**4b**: 1H NMR (C6D6, rt): *δ* 5.91 (q, *J* = 14.7 Hz, 1H, μ-H), 2.31 (s, 18H, C5*Me*4SiMe3), 2.25 (m, 2H, *μ*3-C=CC2*H*5), 1.93 (s, 18H, C5*Me*4SiMe3), 0.64 (t, *J* = 7.3 Hz, 3H, *μ*3-C=CC2*H5*), 0.38 (s, 27H, C5Me4Si*Me*3), –2.33 (d, *J* = 14.7 Hz, 3H, *μ*-H). 13C{1H} NMR (C6D6, rt): *δ* 338.8 (s, *μ*3-*C*=CC2H5), 255.9 (s, *μ*3-C=*C*C2H5), 128.9 (s, *C5*Me4SiMe3), 124.5 (s, *C5*Me4SiMe3), 116.4 (s, *C5*Me4SiMe3), 32.0 (s, *μ*3-C=C*C2*H5), 16.6 (s, C5*Me4*SiMe3), 16.4 (s, *μ*3-C=C*C2*H5), 12.4 (s, C5*Me4*SiMe3), 2.9 (s, C5Me4Si*Me3*). Anal. calcd. for C40H72Si3Ti3: C, 61.53; H, 9.29. Found: C, 61.60; H, 9.22.


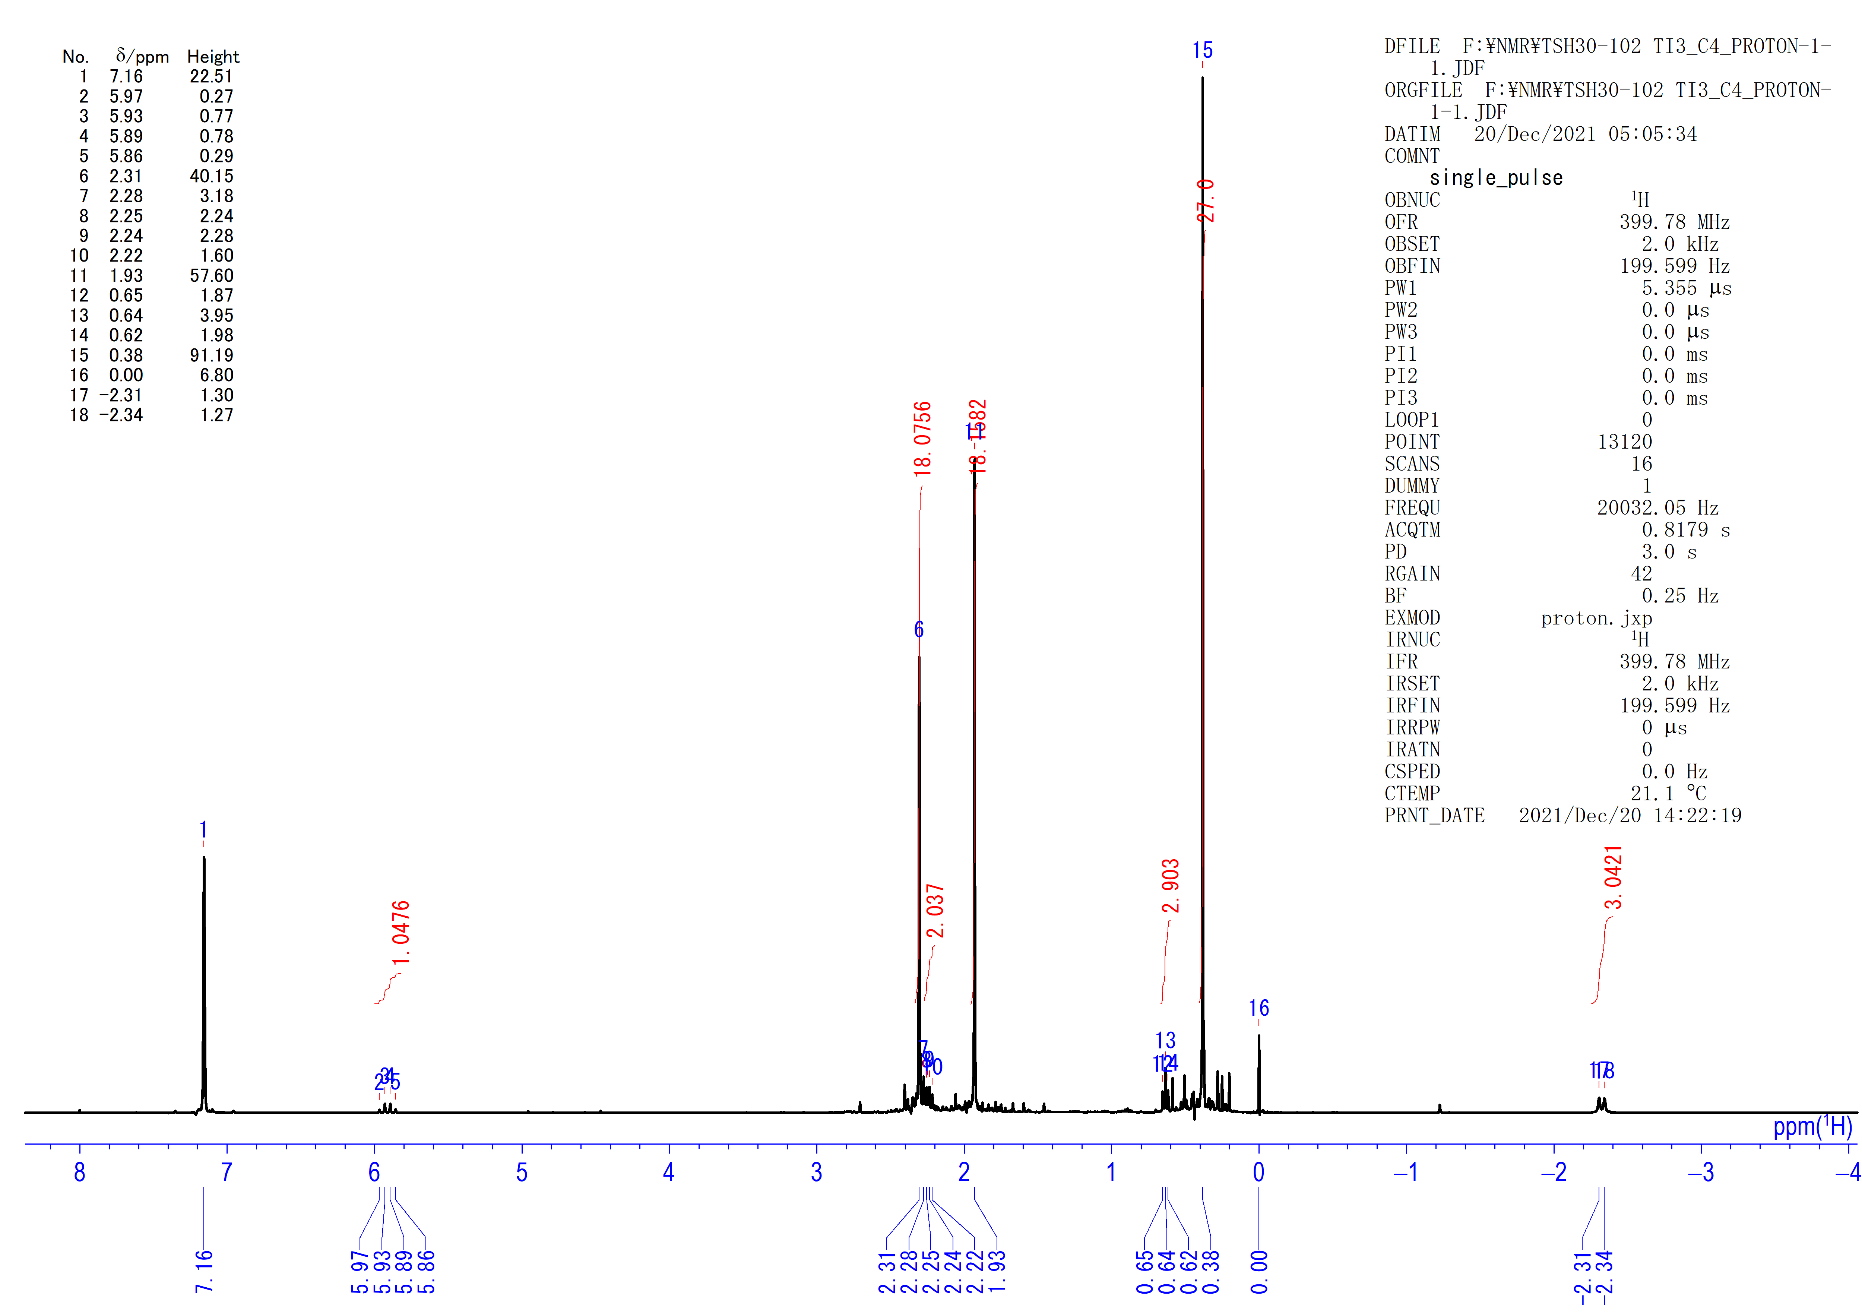


**Figure S12.** 1H NMR spectrum of **4b** (C6D6, rt)


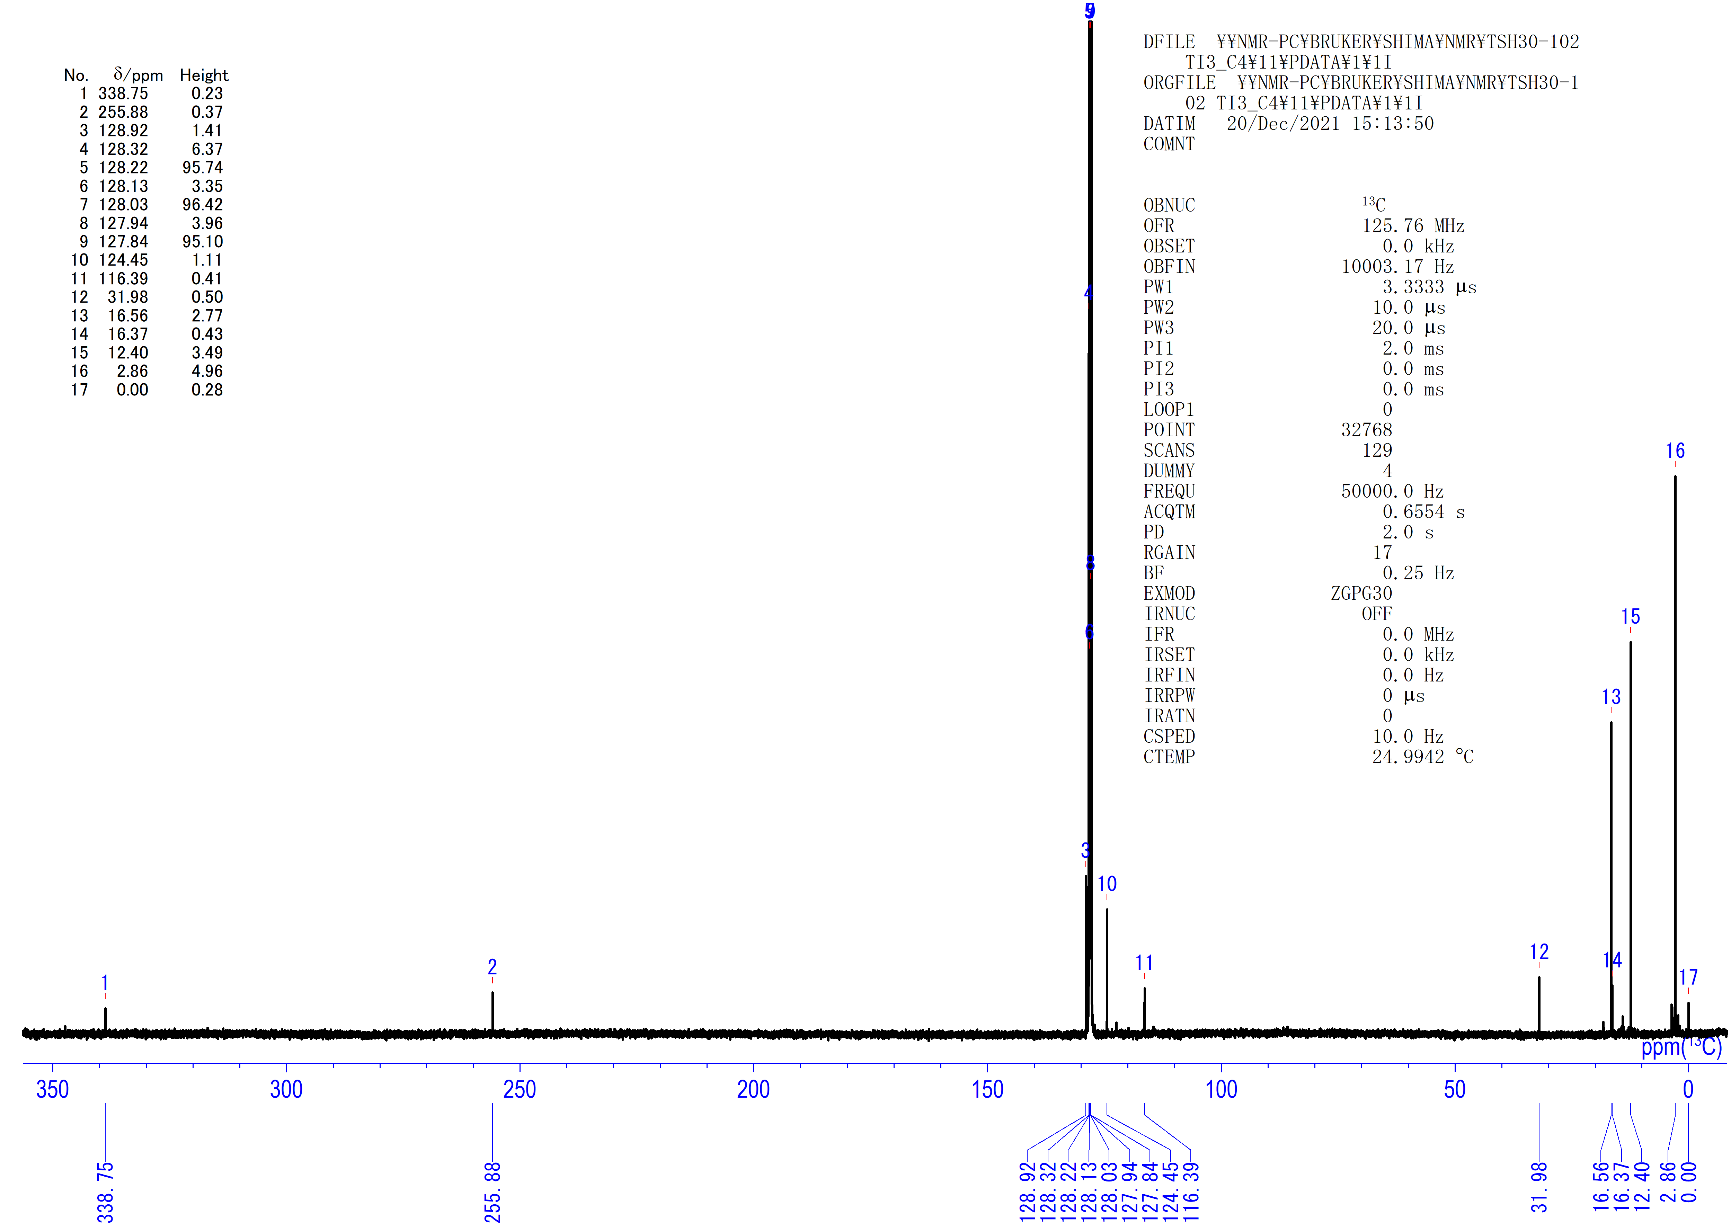


**Figure S13.** 13C{1H} NMR spectrum of **4b** (C6D6, rt)

**[{(C5Me4SiMe3)Ti}3(*μ*3-*η*2,*η*2,*η*1-C=CCH2CH2CH3)(*μ*-H)3(*μ*3-H)] (4c).** To a 2.0 mL hexane solution of **1** (90 mg, 0.12 mmol) was added 1-pentene (80 ml, 0.73 mmol) in a 50-mL round-bottomed flask in an Ar glovebox. The solution was kept at room temperature for 1 h. The solution turned from brown to dark red-brown. After removal of the solvent under vacuum, the resulting solid was dissolved in pentane and crystallized at –30 °C to give dark brown crystals of **4c** (72 mg, 0.091 mmol, 74%).

**4c**: 1H NMR (C6D6, rt): *δ* 5.93 (q, *J* = 14.5 Hz, 1H, *μ*-H), 2.31 (s, 18H, C5*Me4*SiMe3), 2.25 (t, *J* = 7.5 Hz, 2H, *μ*-C=CC3*H7*), 1.94 (s, 18H, C5*Me4*SiMe3), 1.02 (sext, *J* = 7.5 Hz, 2H, *μ*-C=CC3*H7*), 0.82 (t, *J* = 7.5 Hz, 3H, *μ*-C=CC3*H7*), 0.38 (s, 27H, C5Me4Si*Me3*), –2.32 (d, *J* = 14.5 Hz, 3H, *μ*-H). 13C{1H} NMR (C6D6, rt): *δ* 338.2 (s, *μ*-*C*=CC3H7), 253.8 (s, *μ*-C=*C*C3H7), 129.0 (s, *C5*Me4SiMe3), 124.5 (s, *C5*Me4SiMe3), 116.5 (s, *C5*Me4SiMe3), 41.4 (s, *μ*-C=C*C3*H7), 25.1 (s, *μ*-C=C*C3*H7), 16.6 (s, C5*Me4*SiMe3), 14.3 (s, *μ*-C=C*C3*H7), 12.5 (s, C5*Me4*SiMe3), 2.9 (s, C5Me4Si*Me3*). Anal. calcd. for C41H74Si3Ti3∙(C5H11)0.5: C, 62.88; H, 9.70. Found: C, 63.29; H, 9.39.


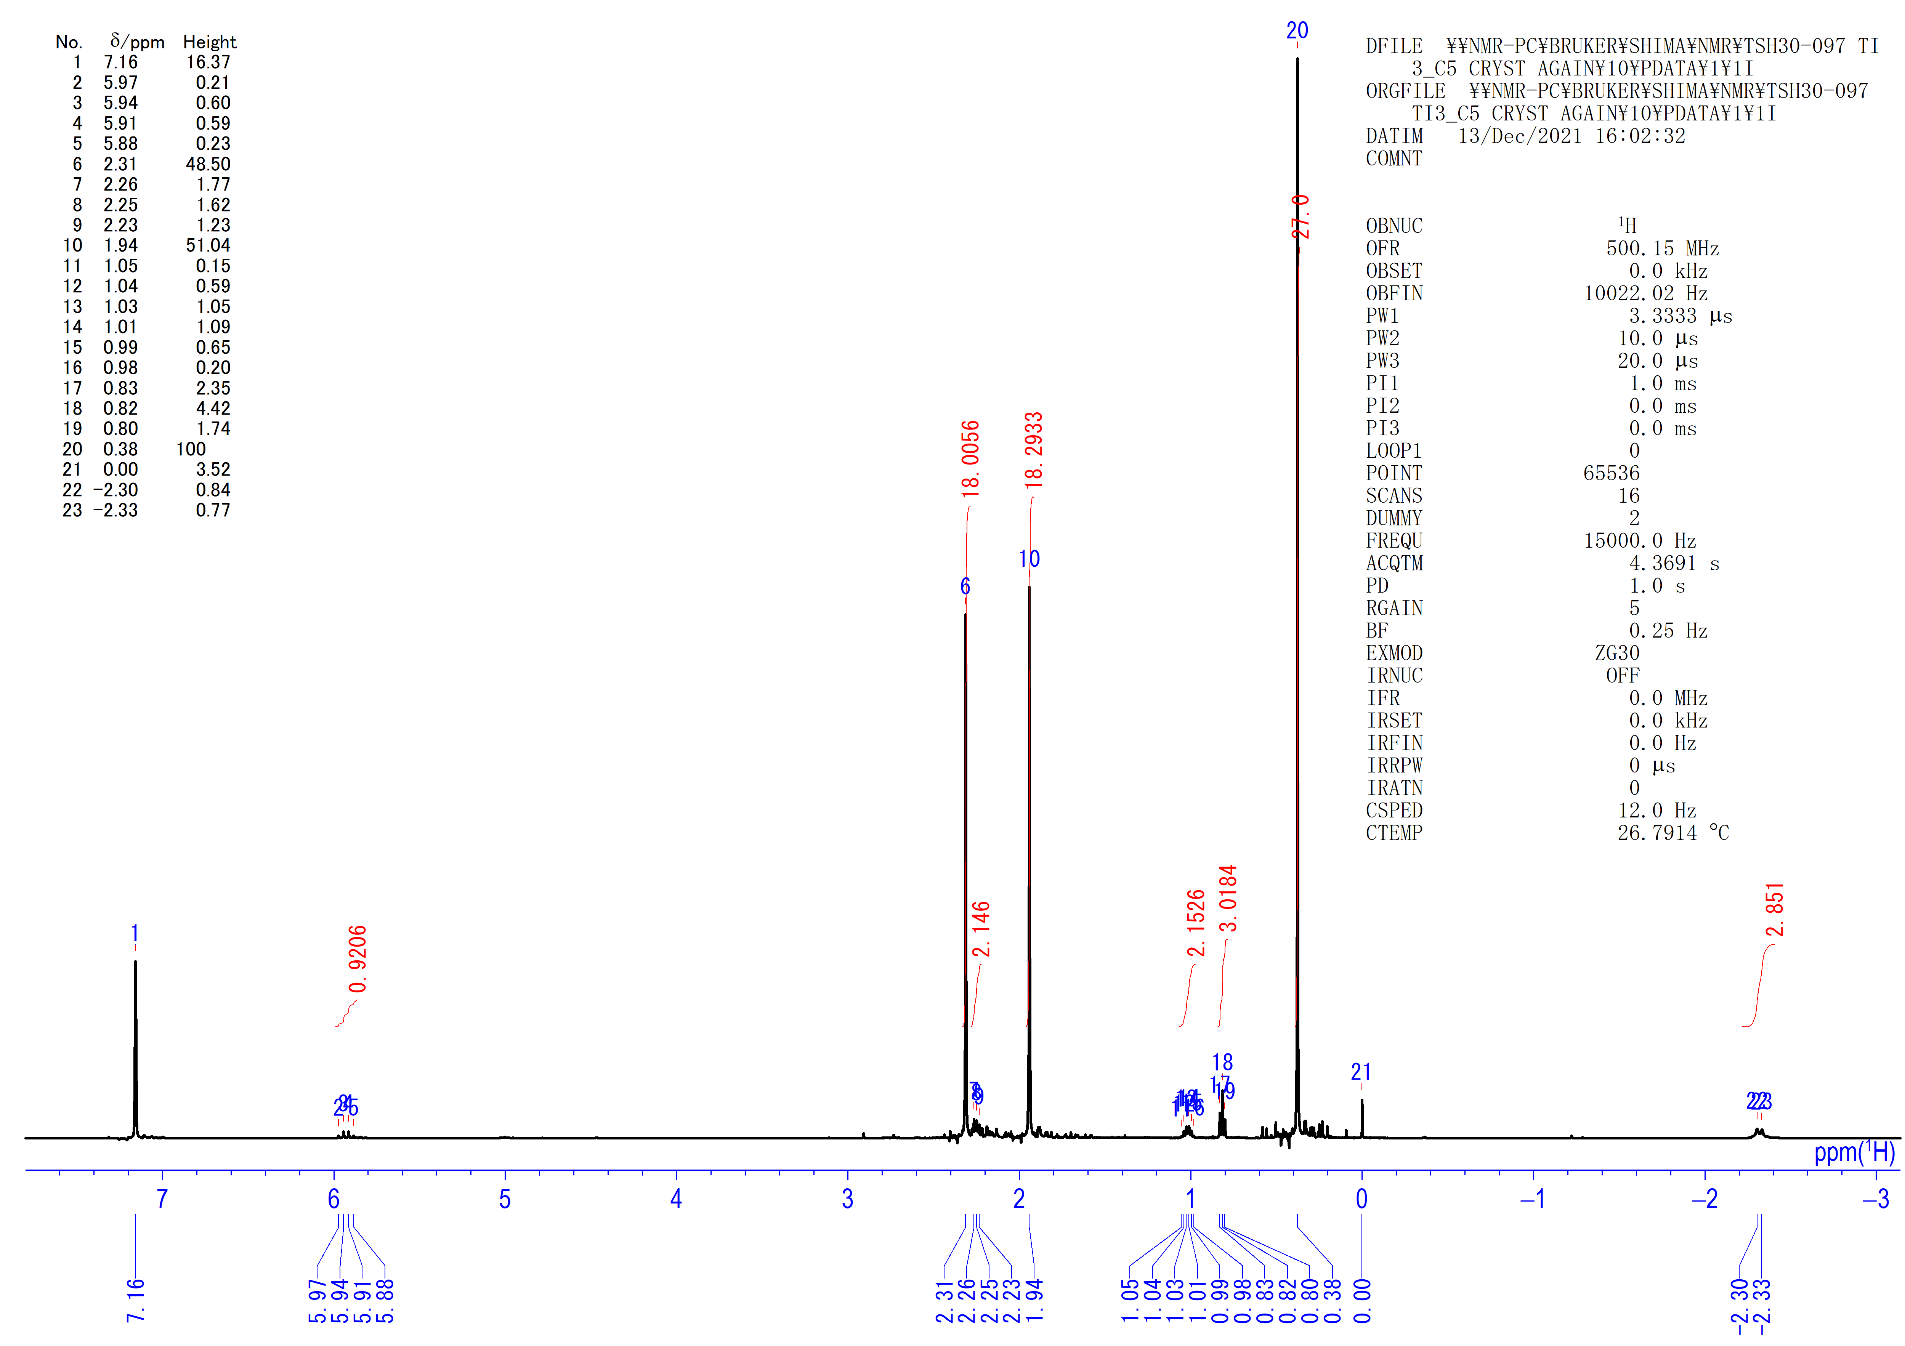


**Figure S14.** 1H NMR spectrum of **4c** (C6D6, rt).

**
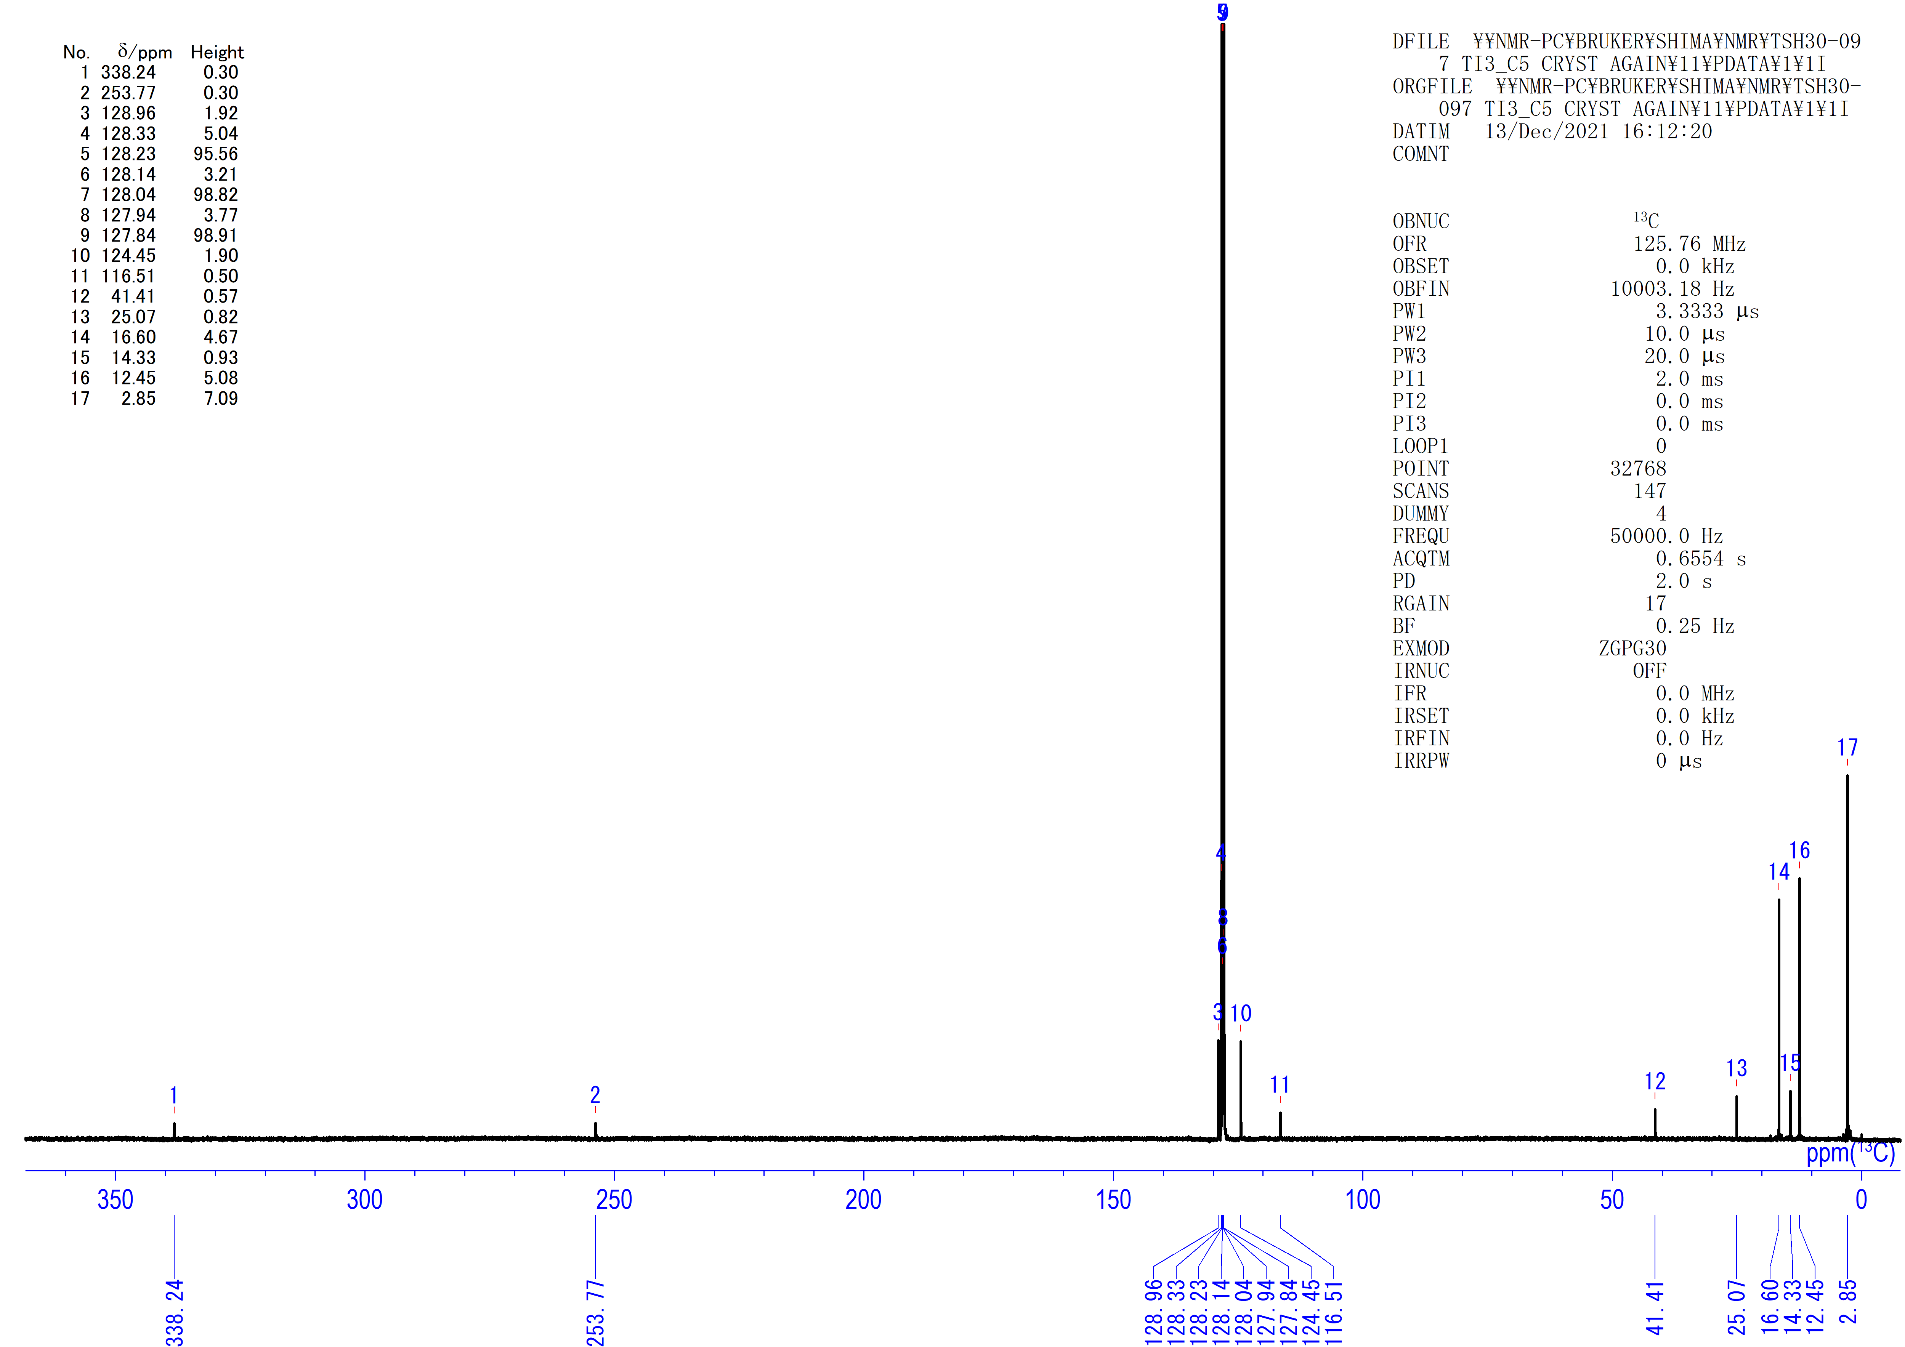
Figure S15.** 13C{1H} NMR spectrum of **4c** (C6D6, rt).

**[{(C5Me4SiMe3)Ti}3(*μ*3-*η*2,*η*2,*η*1-C=CCH2CH2CH2CH3)(*μ*-H)3(*μ*3-H)] (4d).** To a 2.0 mL hexane solution of **1** (100 mg, 0.137 mmol) was added 1-hexene (100 ml, 0.8 mmol) in a 50-mL round-bottomed flask in an Ar glovebox. The solution was kept at room temperature for 2 h. The solution turned from brown to dark red-brown. After removal of the solvent under vacuum, the resulting solid was dissolved in pentane (1st batch), DME (2nd batch) and crystallized at –30 °C to give dark brown crystals of **4d** (81 mg, 0.10 mmol, 73%).

**4d**: 1H NMR (C6D6, rt): *δ* 5.92 (q, *J* = 14.5 Hz, 1H, *μ*-H), 2.31 (s, 18H, C5*Me4*SiMe3), 2.28 (m, 2H, *μ*-C=CC4*H*9), 1.95 (s, 18H, C5*Me4*SiMe3), 1.21 (sext, *J* = 7.4 Hz, 2H, *μ*-C=CC4*H*9), 1.00 (quint, *J* = 7.5 Hz, 2H, *μ*-C=CC4*H*9), 0.89 (t, *J* = 7.5 Hz, 3H, *μ*-C=CC4*H*9), 0.38 (s, 27H, C5Me4Si*Me3*), –2.33 (d, *J* = 14.5 Hz, 3H, *μ*-H). 13C{1H} NMR (C6D6, rt): *δ* 338.2 (s, *μ*-*C*=CC4H9), 254.0 (s, *μ*-C=*C*C4H9), 128.9 (s, *C5*Me4SiMe3), 124.4 (s, *C5*Me4SiMe3), 116.5 (s, *C5*Me4SiMe3), 38.9 (s, *μ*-C=C*C*4H9), 34.1 (s, *μ*-C=C*C*4H9), 23.0 (s, *μ*-C=C*C*4H9), 16.6 (s, C5*Me4*SiMe3), 14.4 (s, *μ*-C=C*C*4H9), 12.4 (s, C5*Me4*SiMe3), 2.9 (s, C5Me4Si*Me3*). Anal. calcd. for C42H76Si3Ti3: C, 62.36; H, 9.47. Found: C, 62.02; H, 9.38.

**
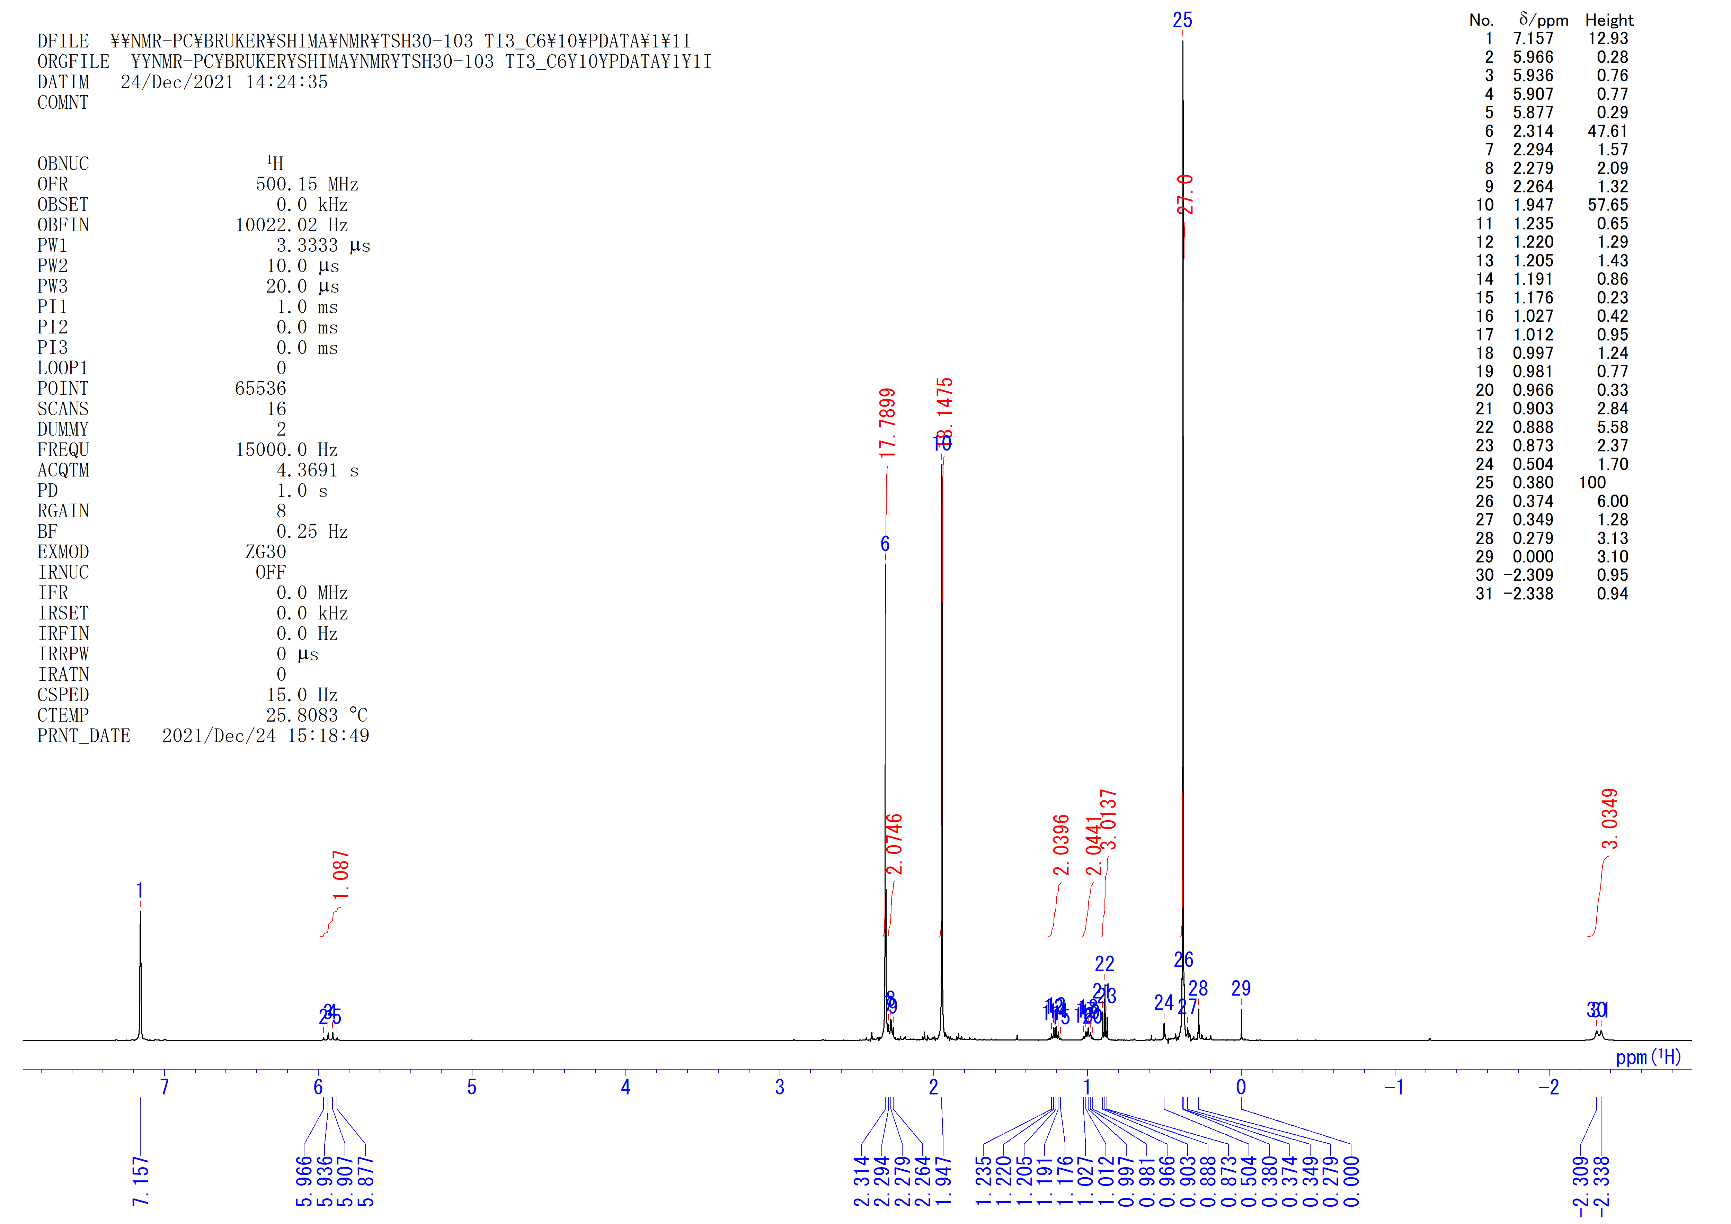
**

**Figure S16.** 1H NMR spectrum of **4d** (C6D6, rt).

**
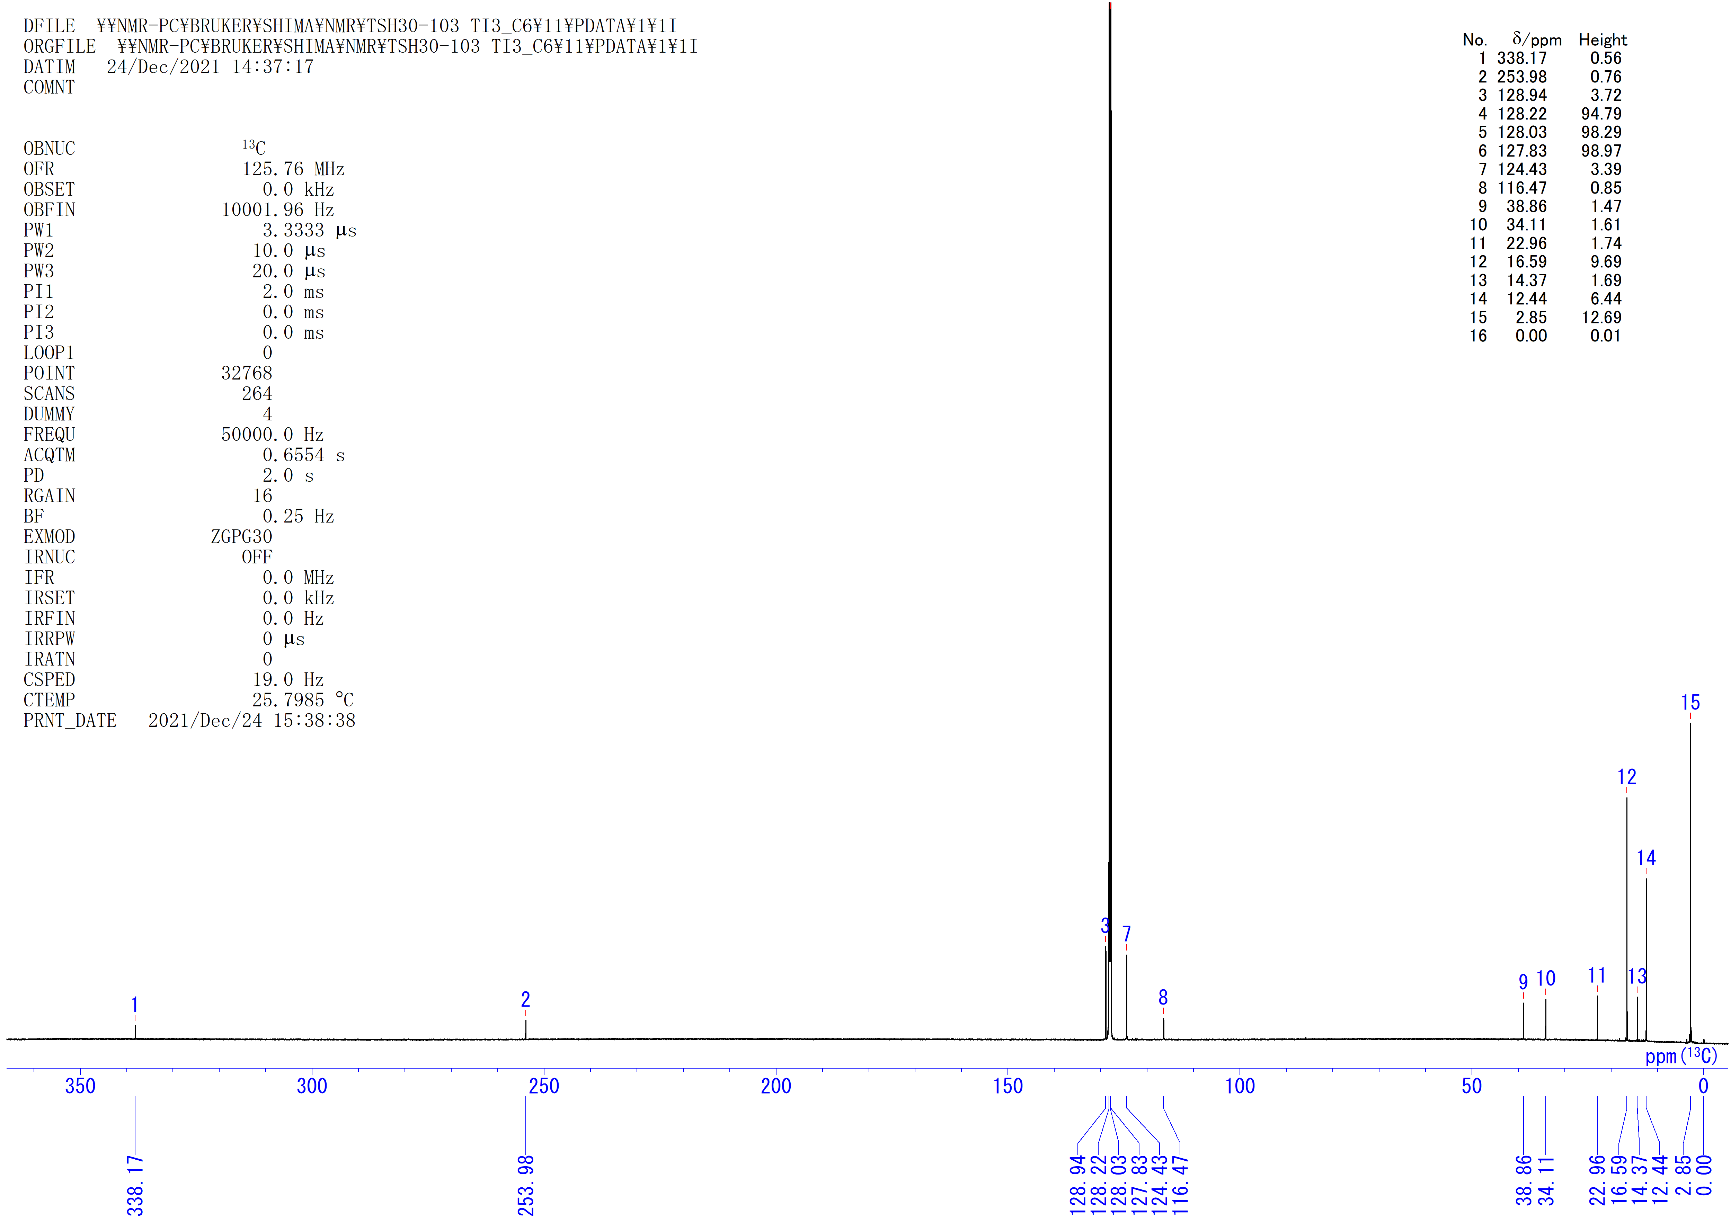
**

**Figure S17.** 13C{1H} NMR spectrum of **4d** (C6D6, rt).

**[{(C5Me4SiMe3)Ti}3(*μ*3-*η*2,*η*2,*η*1-C=CPh)(*μ*-H)3(*μ*3-H)] (4e).** To a 1.0 mL hexane solution of **1** (47 mg, 0.064 mmol) was added styrene (25 ml, 0.22 mmol) in a sample tube in an Ar glovebox. The solution was kept at room temperature for 2 h. The solution turned from brown to dark red-brown. After removal of the solvent under vacuum, the oily crude product was crystallized in DME at –30 °C to give dark brown solids of **4e** (28 mg, 0.034 mmol, 53%).

**4e**: 1H NMR (C6D6, rt): *δ* 7.08 (t, *J* = 7.6 Hz, 2H, Ph), 6.82 (t, *J* = 7.6 Hz, 1H, Ph), 6.69 (d, *J* = 7.6 Hz, 2H, Ph), 5.38 (q, *J* = 15.0 Hz, 1H, *μ*-H), 2.37 (brs, 18H, C5*Me4*SiMe3), 1.88 (brs, 18H, C5*Me4*SiMe3), 0.35 (s, 27H, C5Me4Si*Me3*), –2.75 (brs, 2~3H, *μ*-H). 1H NMR (C6D6, 50 °C): *δ* 7.06 (t, *J* = 7.6 Hz, 2H, Ph), 6.81 (t, *J* = 7.6 Hz, 1H, Ph), 6.68 (d, *J* = 7.6 Hz, 2H, Ph), 5.39 (brs, 1H, *μ*-H), 2.37 (s, 18H, C5*Me4*SiMe3), 1.89 (brs, 18H, C5*Me4*SiMe3), 0.34 (s, 27H, C5Me4Si*Me3*), –1.61 (brs, 2~3H, *μ*-H). 13C{1H} NMR (C6D6, rt): *δ* 340.8 (s, *μ*-*C*=CPh), 245.6 (s, *μ*-C=*C*Ph), 145.6 (s, *μ*-C=C*Ph*), 127.1 (s, *μ*-C=C*Ph*), 126.1 (s, *μ*-C=C*Ph*), 124.8 (s, *μ*-C=C*Ph*), ring carbons were not observed, 16.7 (s, C5*Me4*SiMe3), 12.7 (s, C5*Me4*SiMe3), 2.6 (s, C5Me4Si*Me3*). Anal. calcd. for C44H72Si3Ti3: C, 63.76; H, 8.76. Found: C, 63.15; H, 8.76.

**
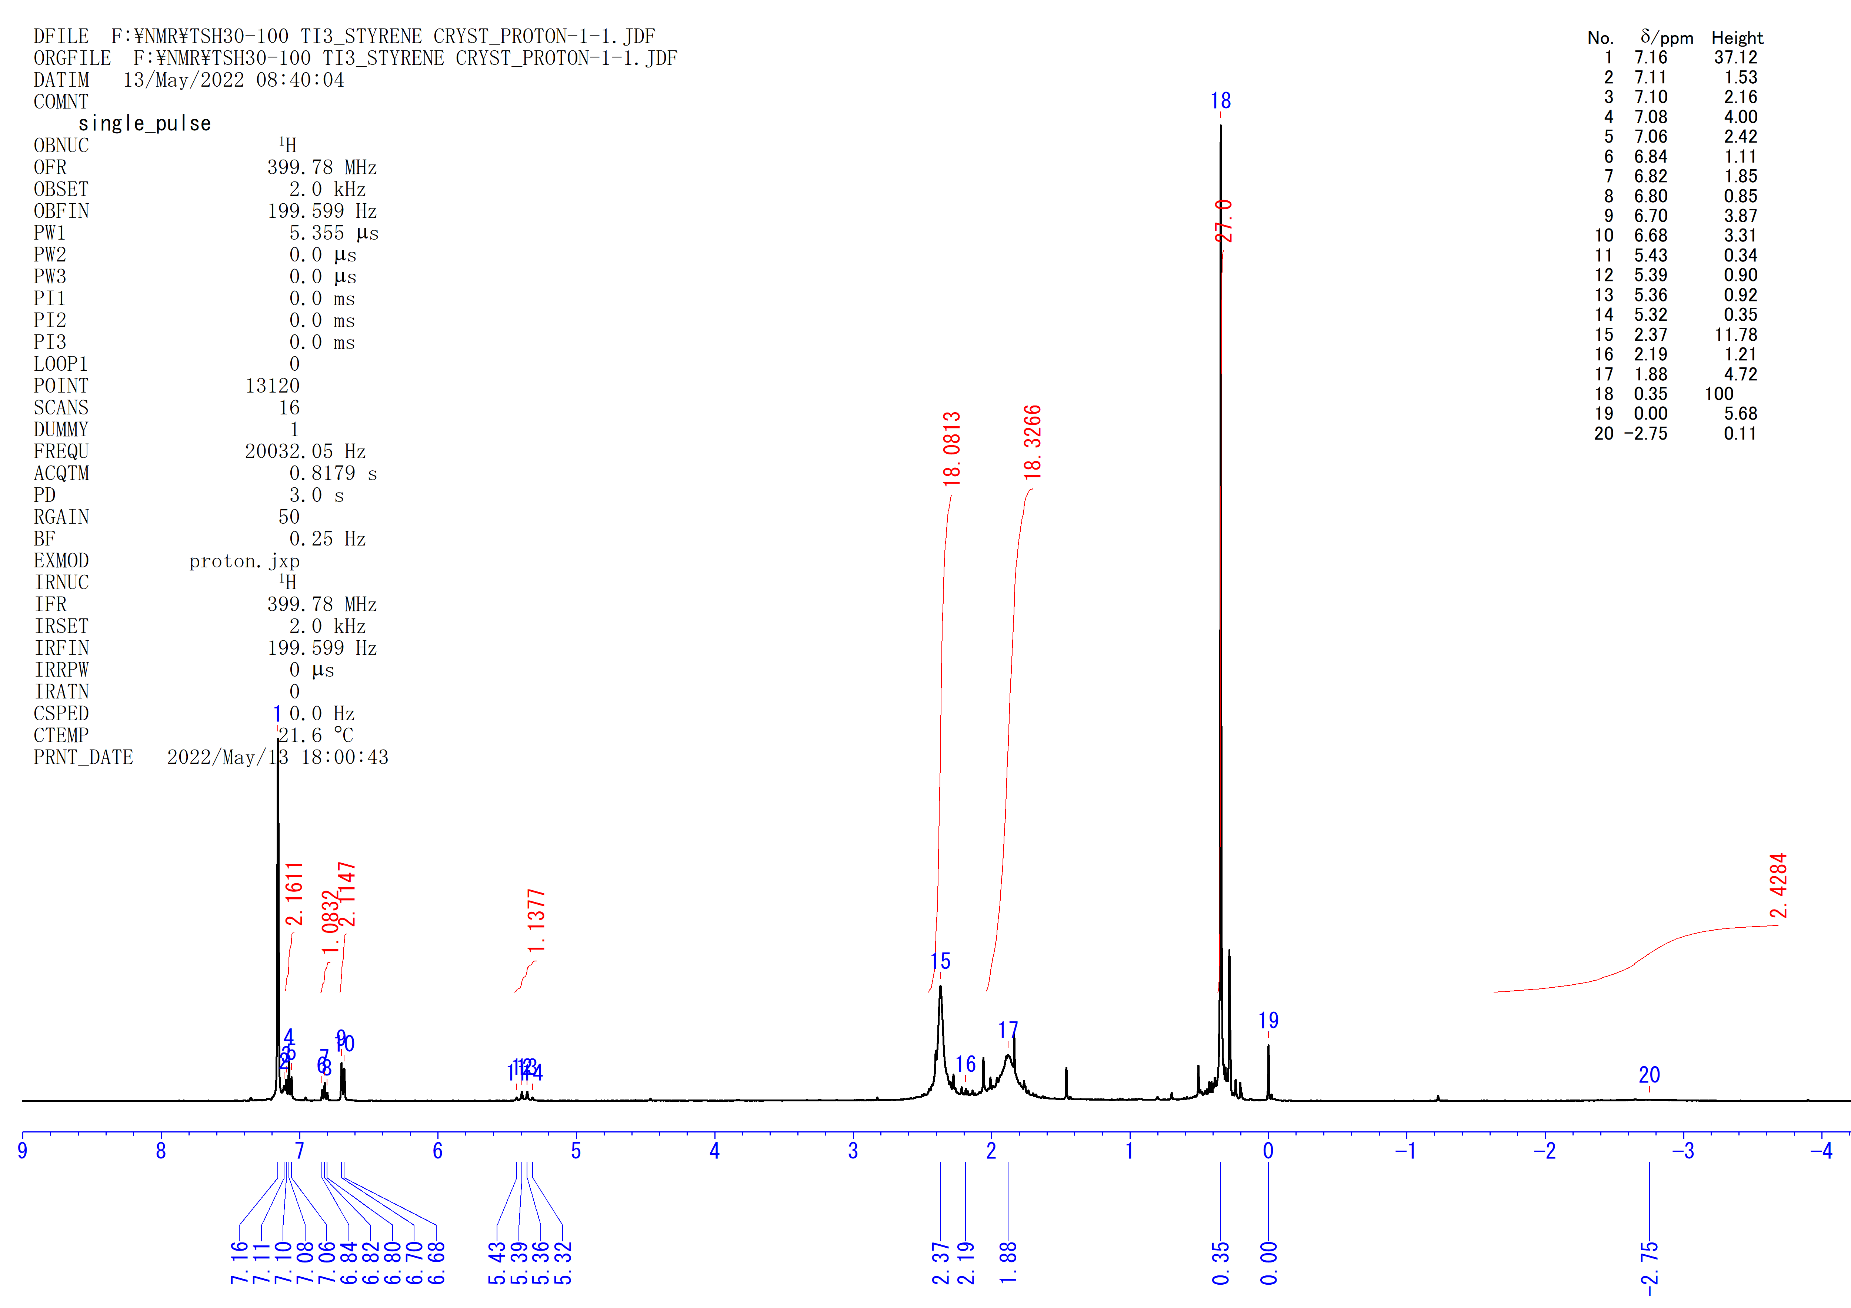
**

**Figure S18.** 1H NMR spectrum of **4e** (C6D6, rt).

**
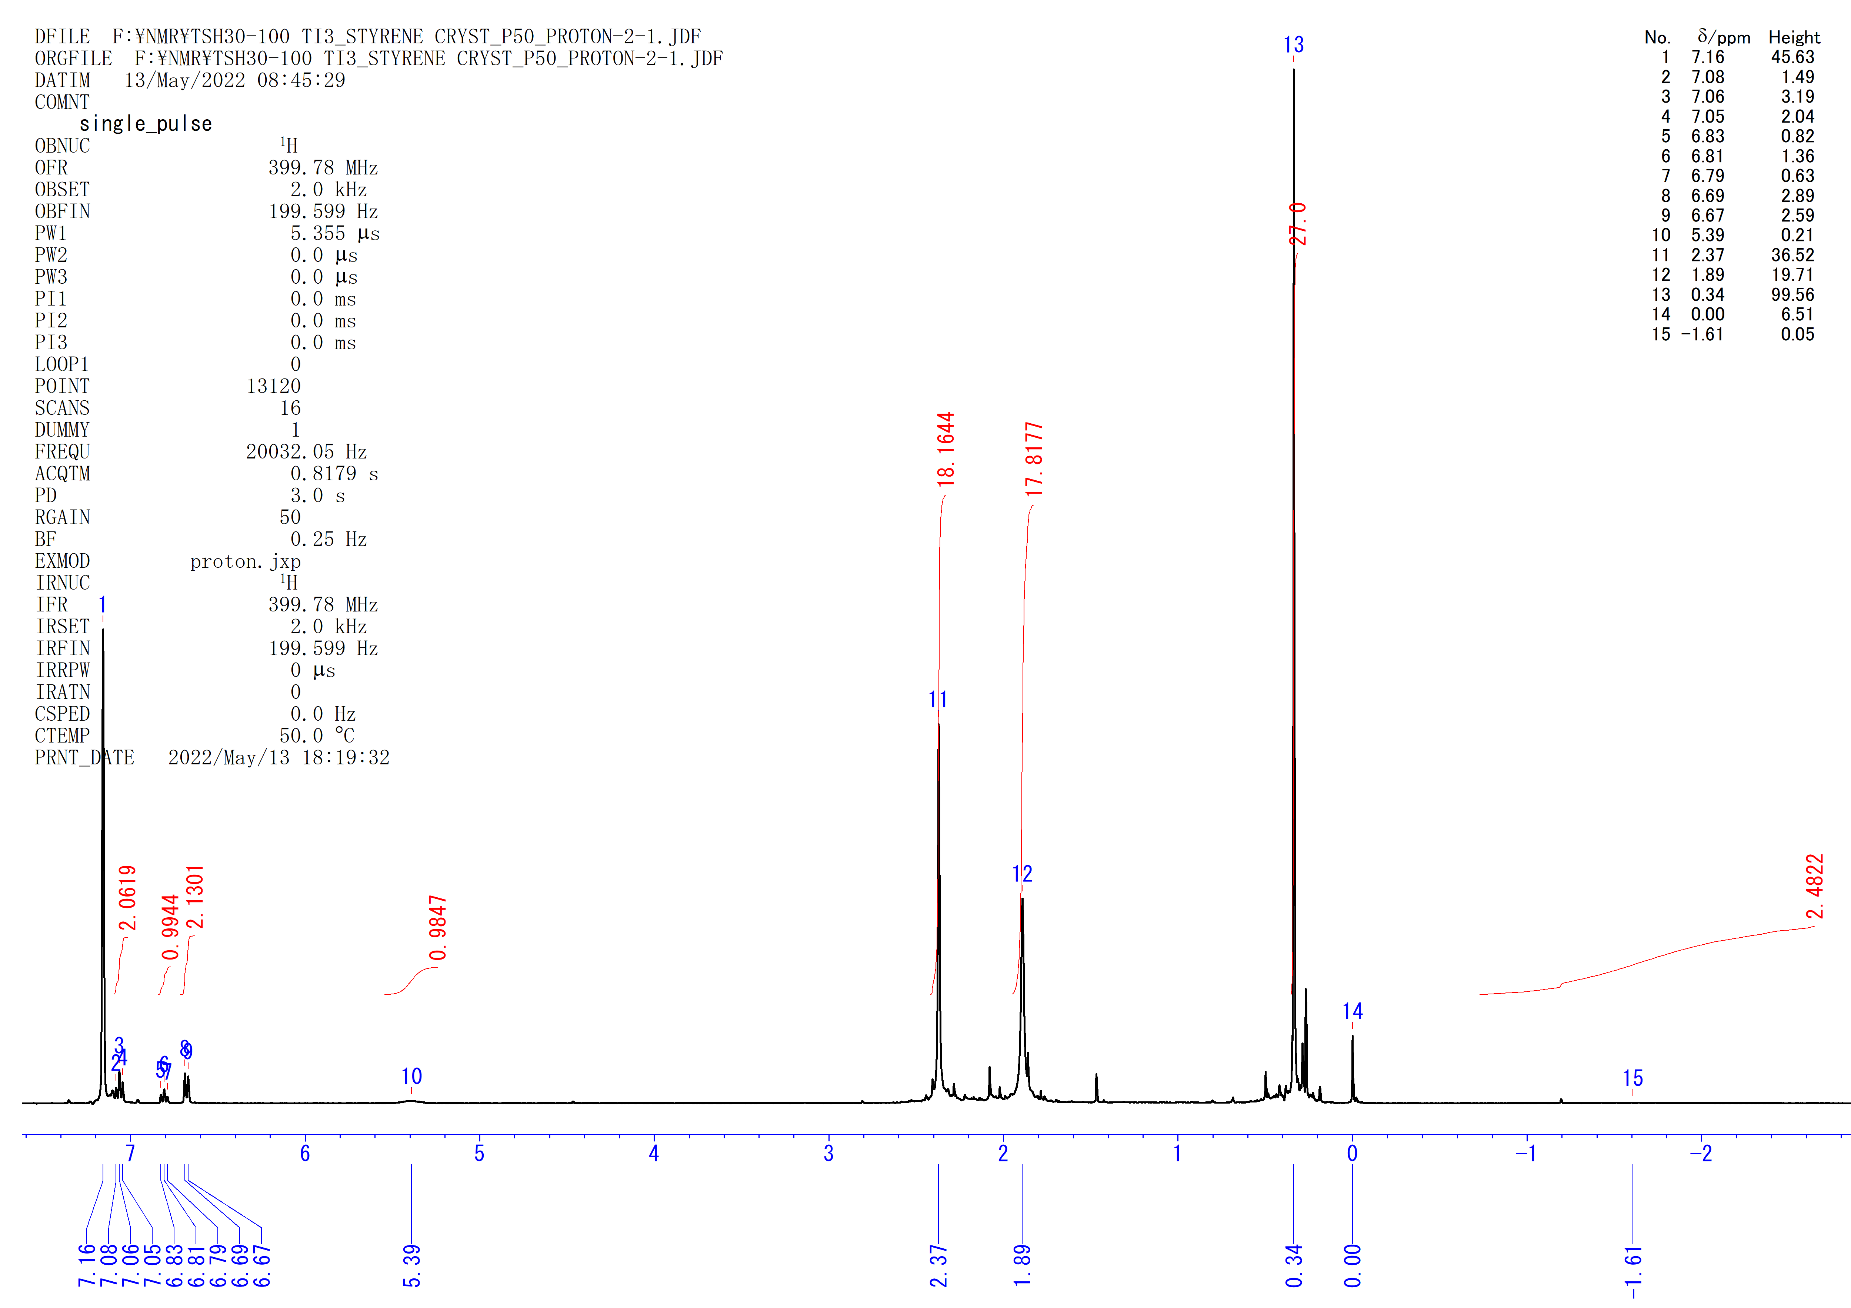
**

**Figure S19.** 1H NMR spectrum of **4e** (C6D6, 50 °C).

**
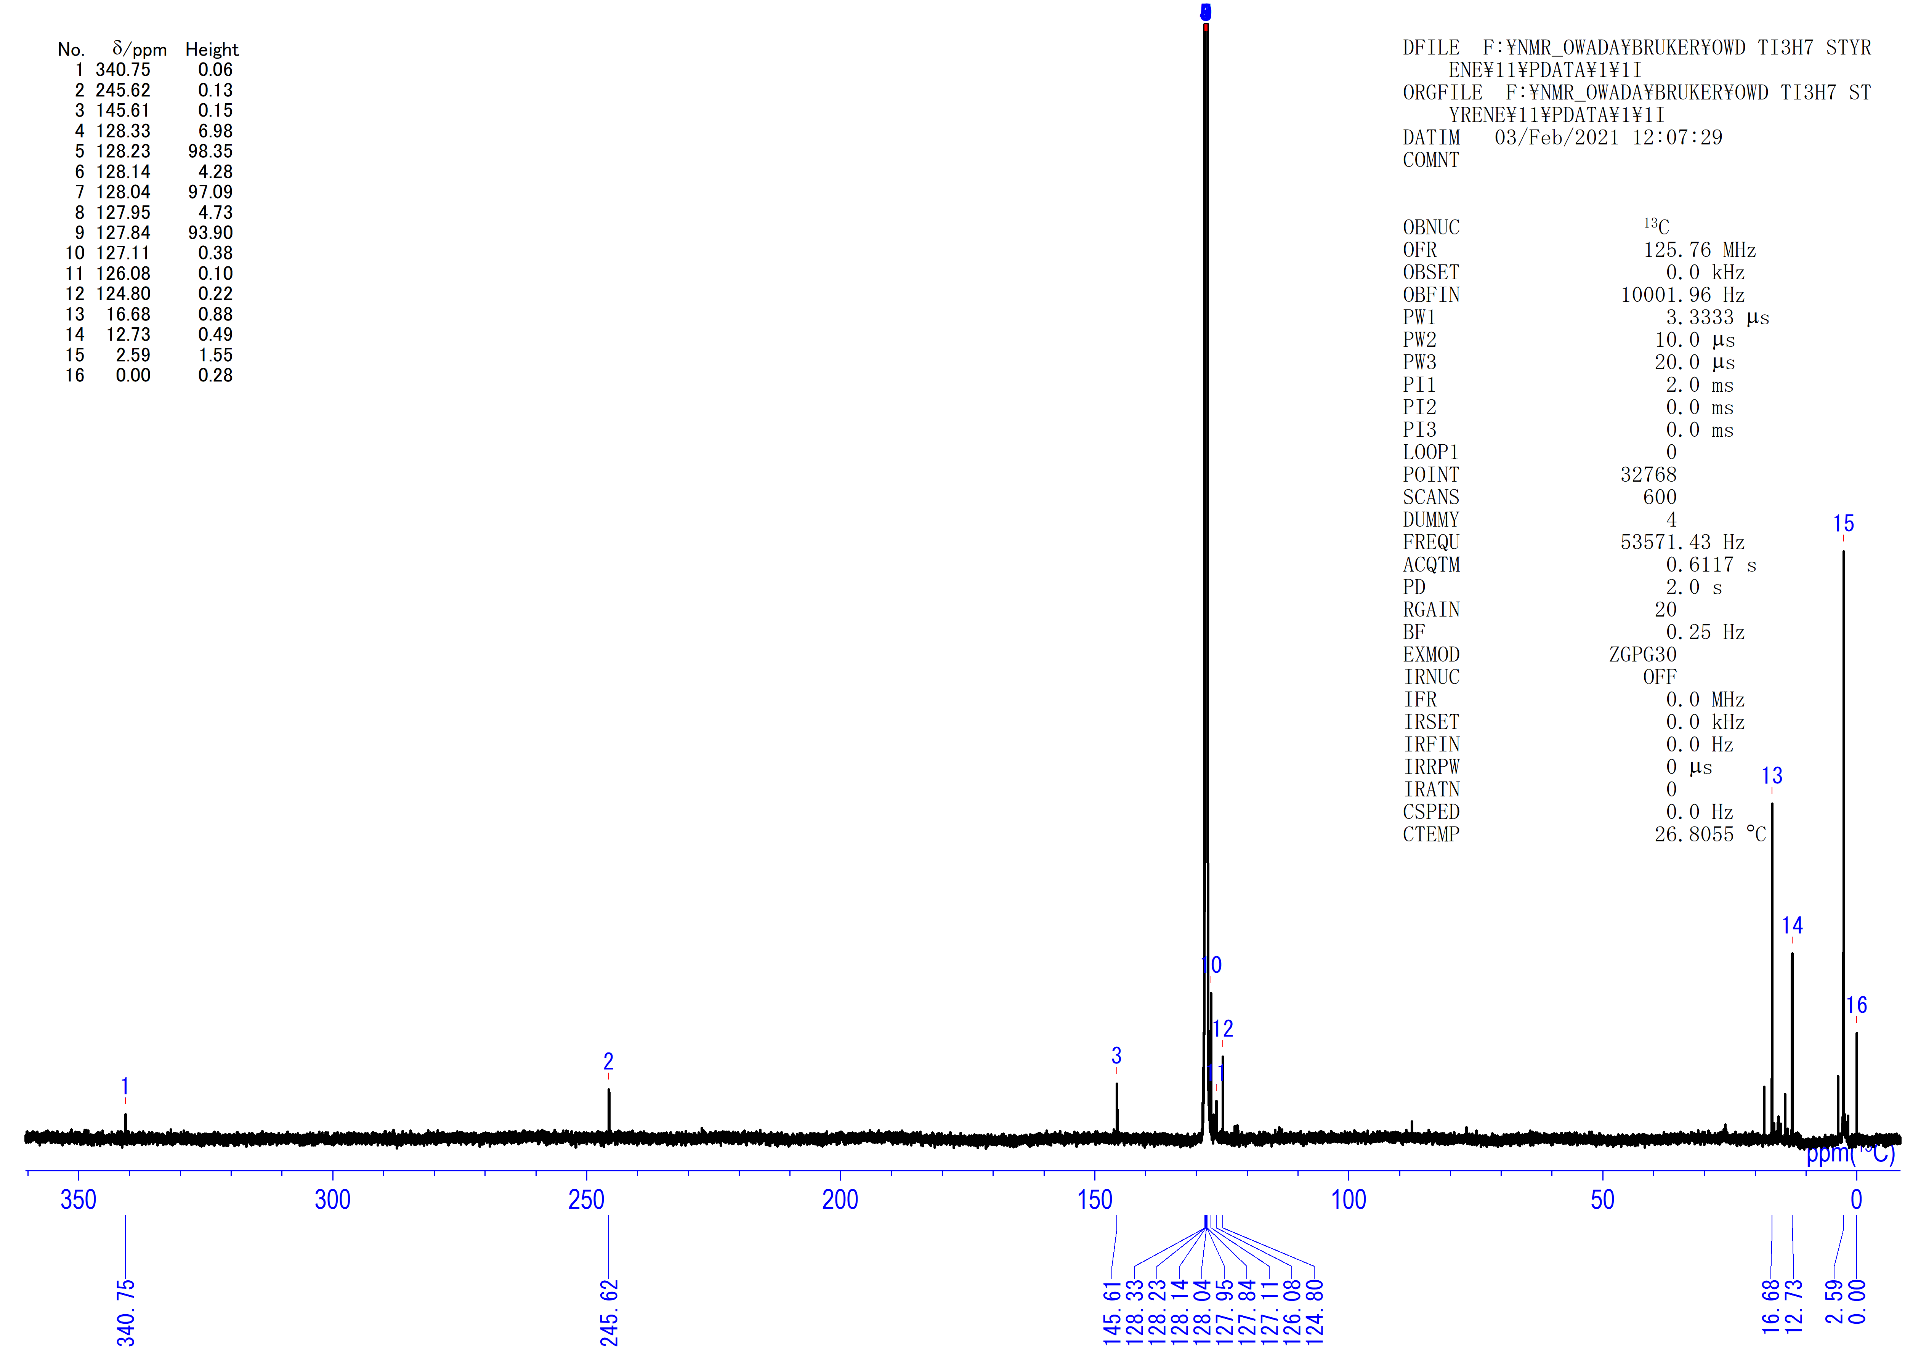
**

**Figure S20.** 13C{1H} NMR spectrum of **4e** (C6D6, rt).

**[(C5Me4SiMe2*t*Bu)TiCl3].** THF solution (35 mL) of [C5Me4SiMe2*t*Bu]Li (Cp”Li) (1.68 g, 6.94 mmol) was slowly added to a suspension of TiCl3(THF)3 (2.57 g, 6.94 mmol) in THF(35 mL) at room temperature. The mixture was refluxed for 1 day. The color of the solution changed from pale blue to deep green. After the reaction, the solution was cooled to 0 ºC and treated dropwise 2 mL of conc. HCl. After removal of the solvent under vacuum, the residual solid was extracted with toluene and filtered. Then the solution was evaporated. The residue was recrystallized from toluene at –33 ºC to afford Cp”TiCl3 (1.52 g, 3.91 mmol, 56%) as red needle crystals.

**Cp”TiCl3**: 1H NMR (C6D6, rt): *δ* 2.29 (s, 6H, C5*Me4*Si*t*BuMe2), 1.92 (s, 6H, C5*Me4*Si*t*BuMe2), 0.69 (s, 9H, C5Me4Si*tBu*Me2), 0.53 (s, 6H, C5Me4Si*t*Bu*Me2*). 13C{1H} NMR (C6D6, rt): *δ* 144.4 (s, *C5*Me4Si*t*BuMe2), 142.3 (s, *C5*Me4Si*t*BuMe2), 138.4 (s, *C5*Me4Si*t*BuMe2), 27.2 (s, C5Me4Si*tBu*Me2), 20.3 (s, C5Me4Si*tBu*Me2), 18.0 (s, C5*Me4*Si*t*BuMe2), 14.0 (s, C5*Me4*Si*t*BuMe2), –2.1 (s, C5Me4Si*t*Bu*Me2*). Anal. calcd. for C15H27Cl3SiTi: C, 46.23; H, 6.98. Found: C, 47.95; H, 7.02.

**
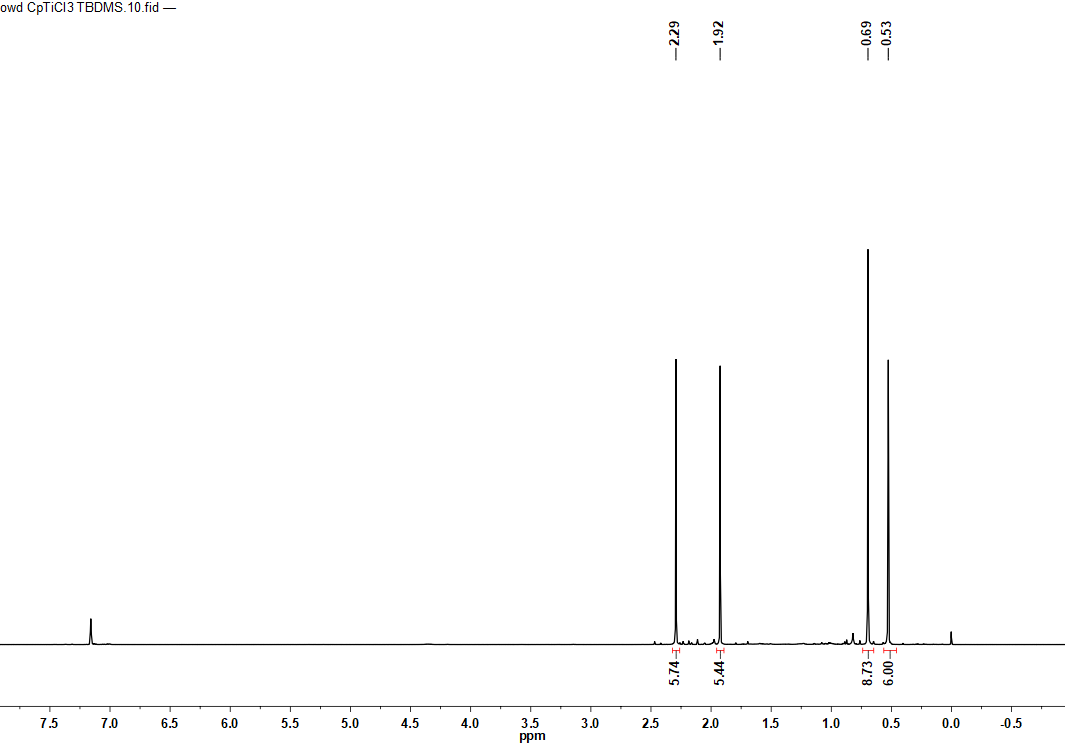
Figure S21.** 1H NMR spectrum of **Cp”TiCl3** (C6D6, rt, *…residual internal C6D5H)

*

**
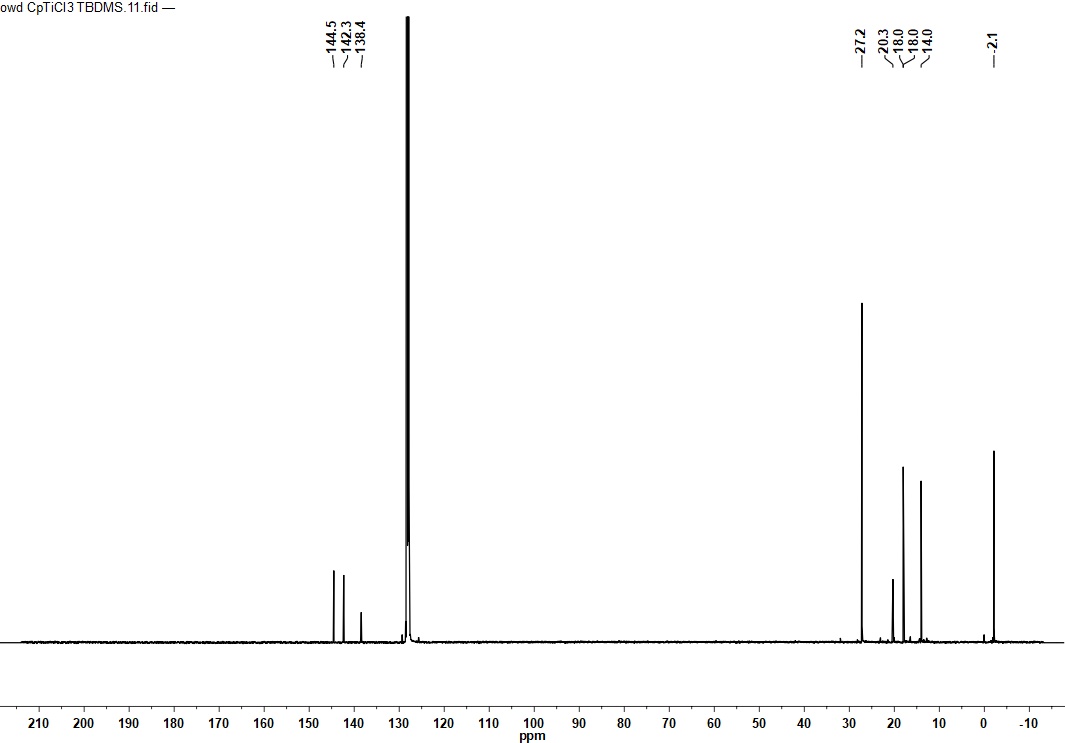
Figure S22.** 13C{1H} NMR spectrum of **Cp”TiCl3** (C6D6, rt, *…C6D6)

*

**[Cp”Ti(CH2SiMe3)3].** Toluene suspension (14 mL) of LiCH2SiMe3 (249 mg, 2.64 mmol, 3 equiv.) was slowly added to a solution of **Cp”TiCl3** (343 mg, 0.879 mmol) in toluene (10 mL) at room temperature. The mixture was stirred for 1h. After removal of the solvent under vacuum, the residue was extracted with hexane and filtered. The hexane solution was concentrated and recrystallized at –33 ºC to give **[Cp”Ti(CH2SiMe3)3]** (465 mg, 0.853 mmol, 97%) as yellowish-brown block crystals.

**[Cp”Ti(CH2SiMe3)3]**: 1H NMR (C6D6, rt): *δ* 2.11 (s, 6H, Ti(C*H2*SiMe3)3), 1.88 (s, 6H, C5*Me4*Si*t*BuMe2), 1.55 (s, 6H, C5*Me4*Si*t*BuMe2), 0.91 (s, 9H, C5Me4Si*tBu*Me2), 0.35 (s, 6H, C5Me4Si*t*Bu*Me2*), 0.28 (s, 27H, Ti(CH2Si*Me3*)3). 13C{1H} NMR (C6D6, rt): *δ* 129.6 (s, *C5*Me4Si*t*BuMe2), 127.8 (s, *C5*Me4Si*t*BuMe2), 119.7 (s, *C5*Me4Si*t*BuMe2), 86.1 (s, Ti(*C*H2SiMe3)3), 27.5 (s, C5Me4Si*tBu*Me2), 20.7 (s, C5Me4Si*tBu*Me2), 16.6 (s, C5*Me4*Si*t*BuMe2), 13.3 (s, C5*Me4*Si*t*BuMe2), 3.0 (s, Ti(CH2Si*Me3*)3), –1.7 (s, C5Me4Si*t*Bu*Me2*). Anal. calcd. for C27H60Si4Ti: C, 59.51; H, 11.10. Found: C, 59.99; H, 10.71.


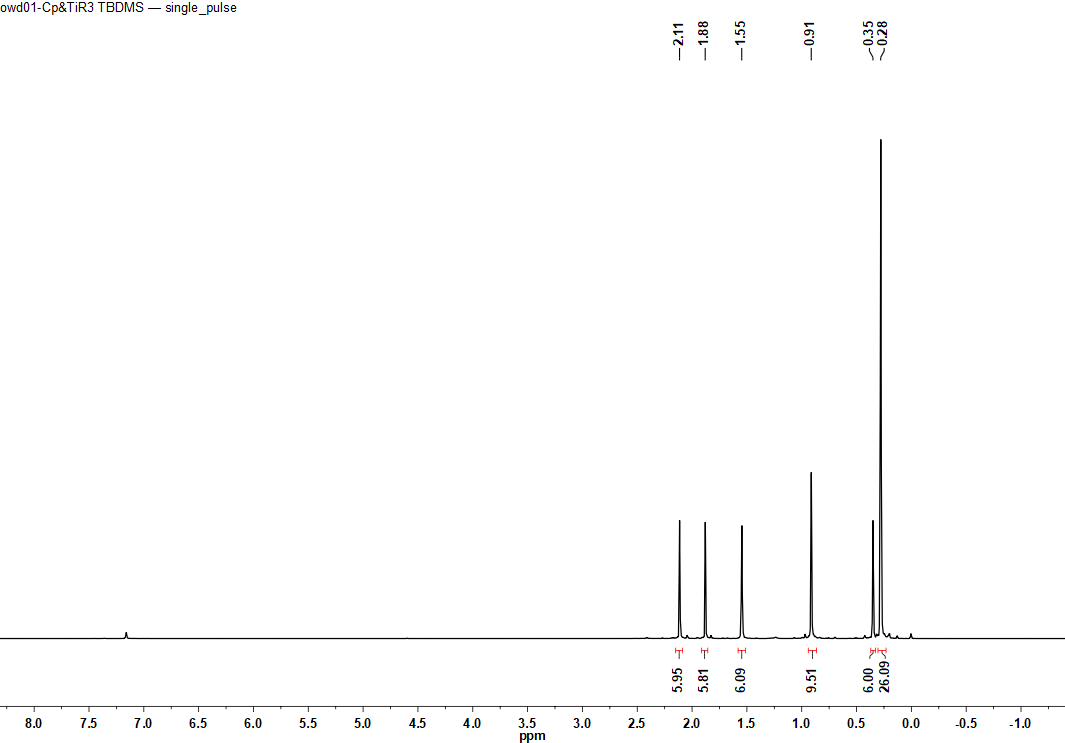


**Figure S23.** 1H NMR spectrum of **[Cp”Ti(CH2SiMe3)3]** (C6D6, rt).


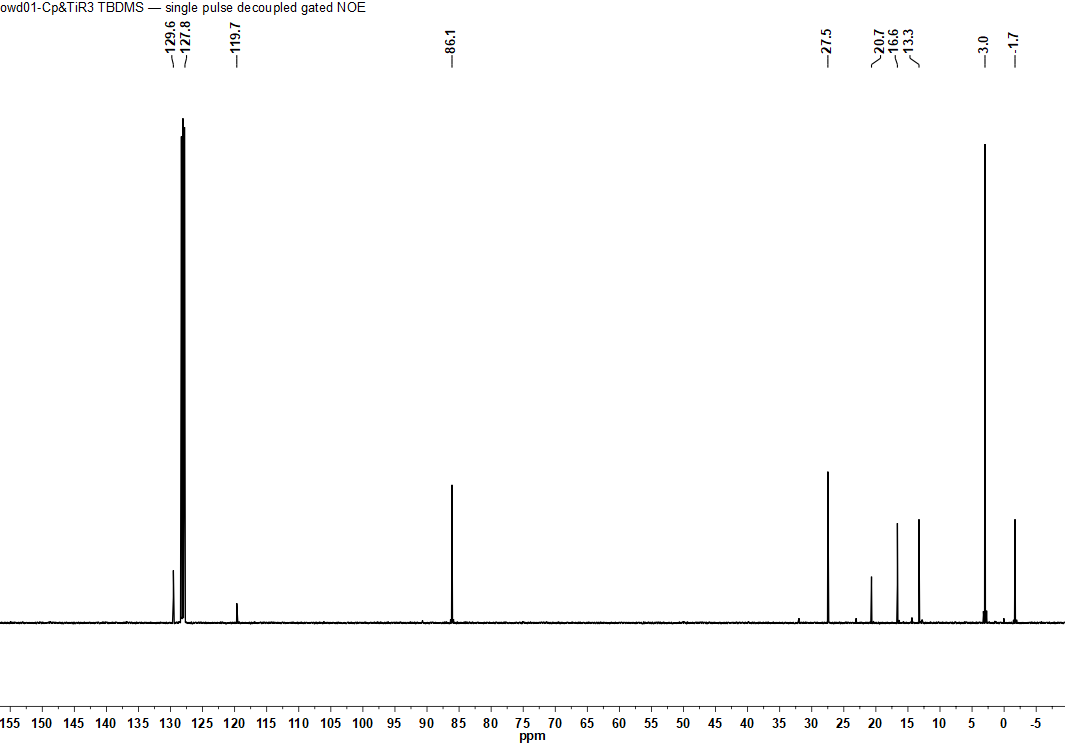


**Figure S24.** 13C{1H} NMR spectrum of **[Cp”Ti(CH2SiMe3)3]** (C6D6, rt)

**[(Cp”Ti)3(*μ*3-H)(*μ*-H)6] (1’).** A hexane solution (6 mL) of **[Cp”Ti(CH2SiMe3)3]** (626 mg, 1.15 mmol) in 10 mL Hiper Glass Cylinder (TAIATSU TECHNO®) was filled with H2 (4 atm). The solution was stirred at 60 ºC for 19h. After the reaction, the solution was evaporated and recrystallized in hexane solution at –33 ºC to give **1’** (278 mg, 0.295 mmol, 77 %) as dark-brown block crystals. Single crystals of **1’** suitable for X-ray diffraction studies were obtained by recrystallization from a hexane solution at –30 °C.

**1’**: 1H NMR (C6D12, rt): *δ* 2.90 (s, 18H, C5*Me4*Si*t*BuMe2), 2.57 (s, 7H, μ-*H*), 2.13 (s, 18H, C5*Me4*Si*t*BuMe2), 0.88 (s, 27H, C5Me4Si*tBu*Me2), 0.20 (s, 18H, C5Me4Si*t*Bu*Me2*). 13C{1H} NMR (C6D12, rt): *δ* 131.1 (s, *C5*Me4Si*t*BuMe2), 124.7 (s, *C5*Me4Si*t*BuMe2), 113.1 (s, *C5*Me4Si*t*BuMe2), 28.5 (s, C5Me4Si*tBu*Me2), 21.0 (s, C5Me4Si*tBu*Me2), 18.6 (s, C5*Me4*Si*t*BuMe2), 14.0 (s, C5*Me4*Si*t*BuMe2), 0.2 (s, C5Me4Si*t*Bu*Me2*). Anal. calcd. for C51H102Si3Ti3 (**1’**•Hex): C, 64.94; H, 10.90. Found: C, 64.38; H, 10.40.


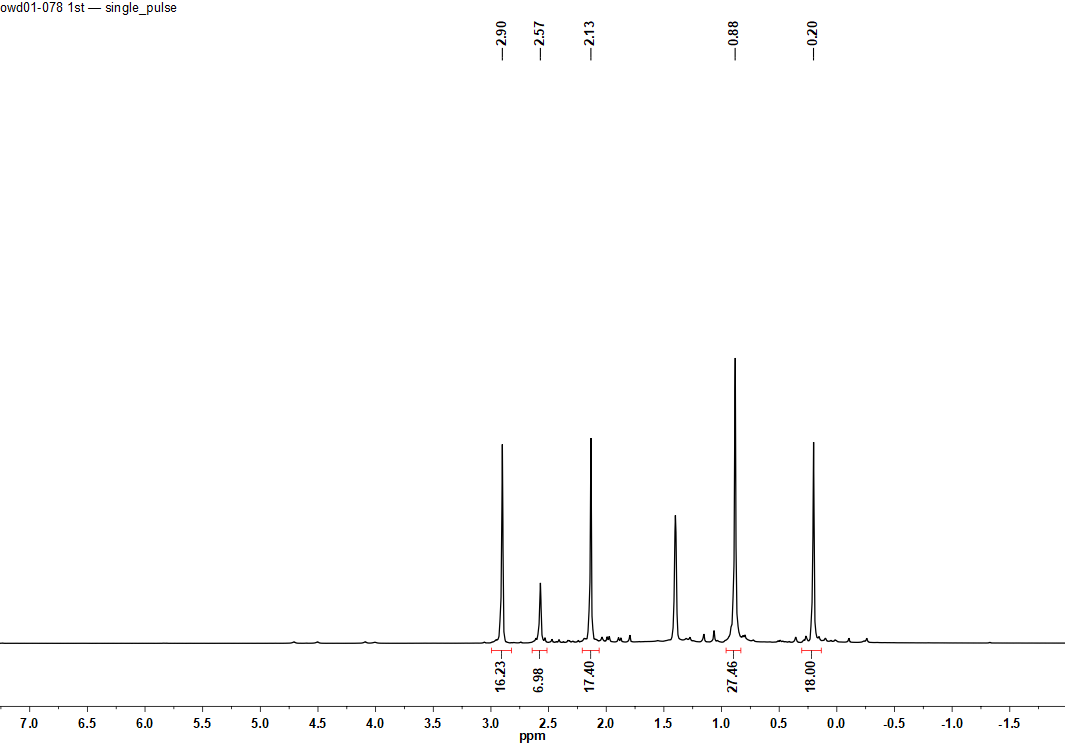


*

**Figure S25.** 1H NMR spectrum of **1’** (C6D12, rt, *…residual internal C6D11H)

*


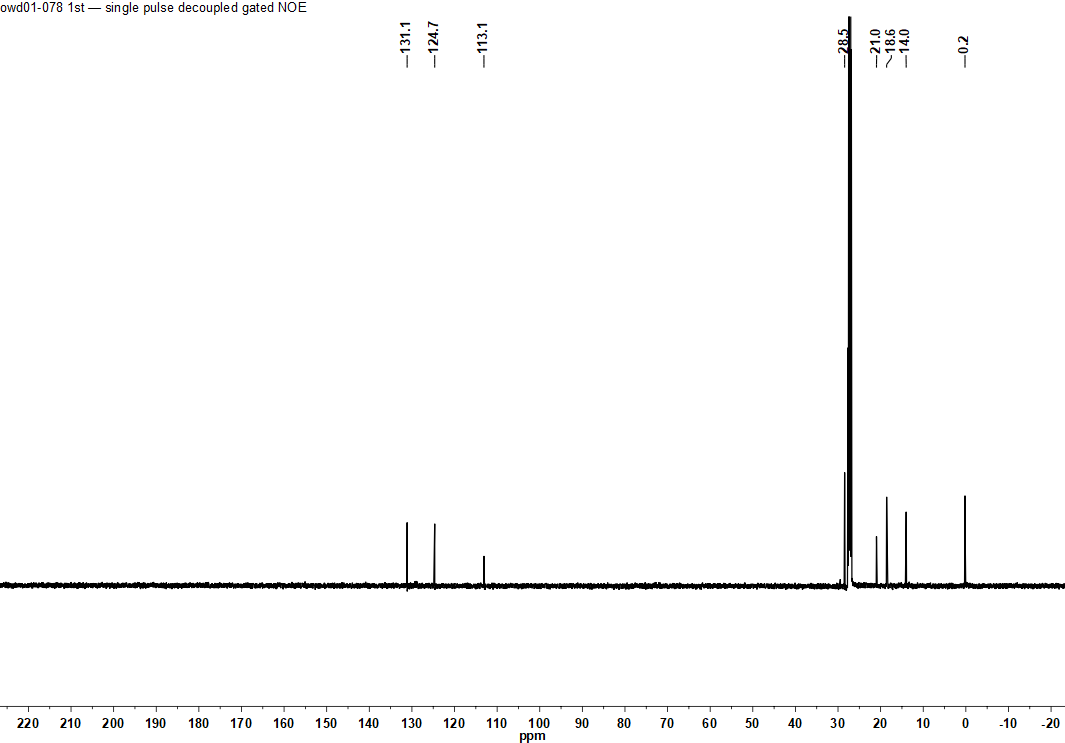


**Figure S26.** 13C{1H} NMR spectrum of **1’** (C6D12, rt, *…C6D12)

**[{(C5Me4SiMe3)Ti}3(*μ*3-*η*2,*η*2,*η*1-C=CC5H9)(*μ*-H)3(*μ*3-H)] (4f).** To a 3.0 mL hexane solution of **1** (110 mg, 0.15 mmol) was added norbornene (42 mg, 0.45 mmol) in a sample tube in an Ar glovebox. The solution was kept at room temperature for 2 hours. After removal of the solvent under vacuum, the crude product was crystallized in DME at –30 °C to give dark brown-purple solids of **4f** (80 mg, 0.097 mmol, 65%). The analogous C5Me4SiMe2*t*Bu-ligated complex [{(C5Me4SiMe2*t*Bu)Ti}3(*m*3-*η*2,*η*2,*η*1-C=CC5H9)(*μ*-H)3(*μ*3-H)] (**4f’**) was obtained from the reaction of [{(C5Me4SiMe2*t*Bu)Ti}3(*m*3-H)(*m*-H)6] (**1’**) with norbornene. Single crystals of **4f’** suitable for X-ray diffraction studies were obtained by recrystallization from a DME/benzene solution at –30 °C.

**4f**: 1H NMR (C6D6, rt): *δ* 4.02 (q, *J* = 14.3 Hz, 1H, *μ*-H), 2.63 (qt, *J* = 7.6 Hz, 1H, -C5*H*9), 2.32 (s, 18H, C5*Me4*SiMe3), 1.99 (s, 18H, C5*Me4*SiMe3), 1.66 (m, 2H,-C5*H*9), 1.59 (m, 2H,-C5*H*9), 1.41 (m, 2H,-C5*H*9), 0.94 (m, 2H,-C5*H*9), 0.36 (s, 27H, C5Me4Si*Me3*), –2.44 (d, *J* = 14.3 Hz, 3H, *μ*-H). 13C{1H} NMR (C6D6, rt): *δ* 341.0 (s, *μ*-*C*=CC5H9), 255.6 (s, *μ*-C=*C*C5H9), 129.4 (s, *C5*Me4SiMe3), 124.6 (s, *C5*Me4SiMe3), 116.6 (s, *C5*Me4SiMe3), 49.5 (s, *μ*-C=C*C*5H9), 37.6 (s, *μ*-C=C*C*5H9), 25.7 (s, *μ*-C=C*C*5H9), 16.8 (s, C5*Me4*SiMe3), 12.9 (s, C5*Me4*SiMe3), 3.0 (s, C5Me4Si*Me3*). Anal. calcd. for C43H76Si3Ti3: C, 62.91; H, 9.33. Found: C, 61.88; H, 9.15.

**
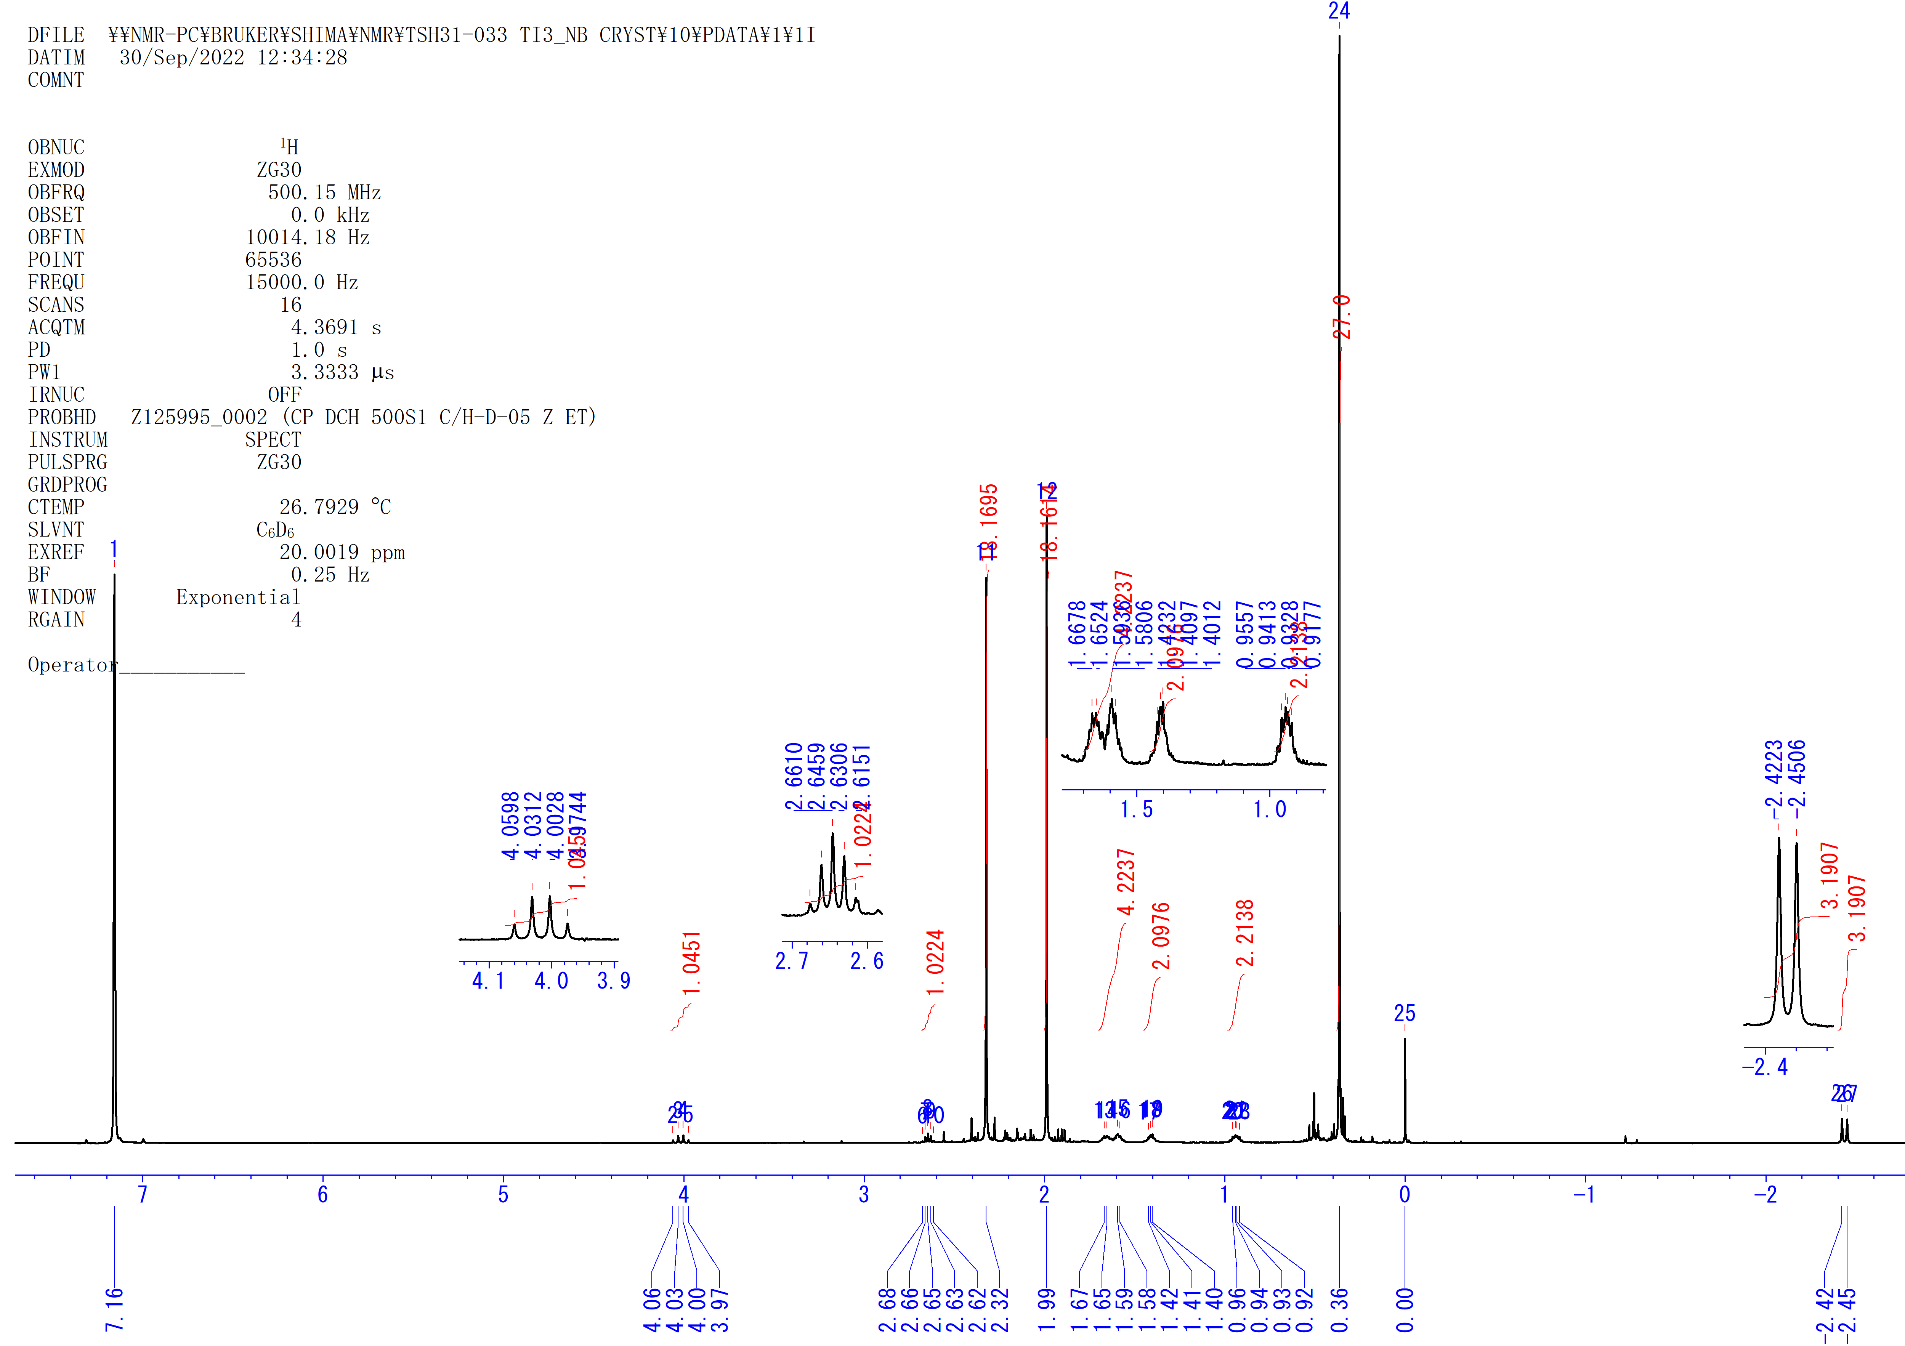
**

**Figure S27.** 1H NMR spectrum of **4f** (C6D6, rt).

**
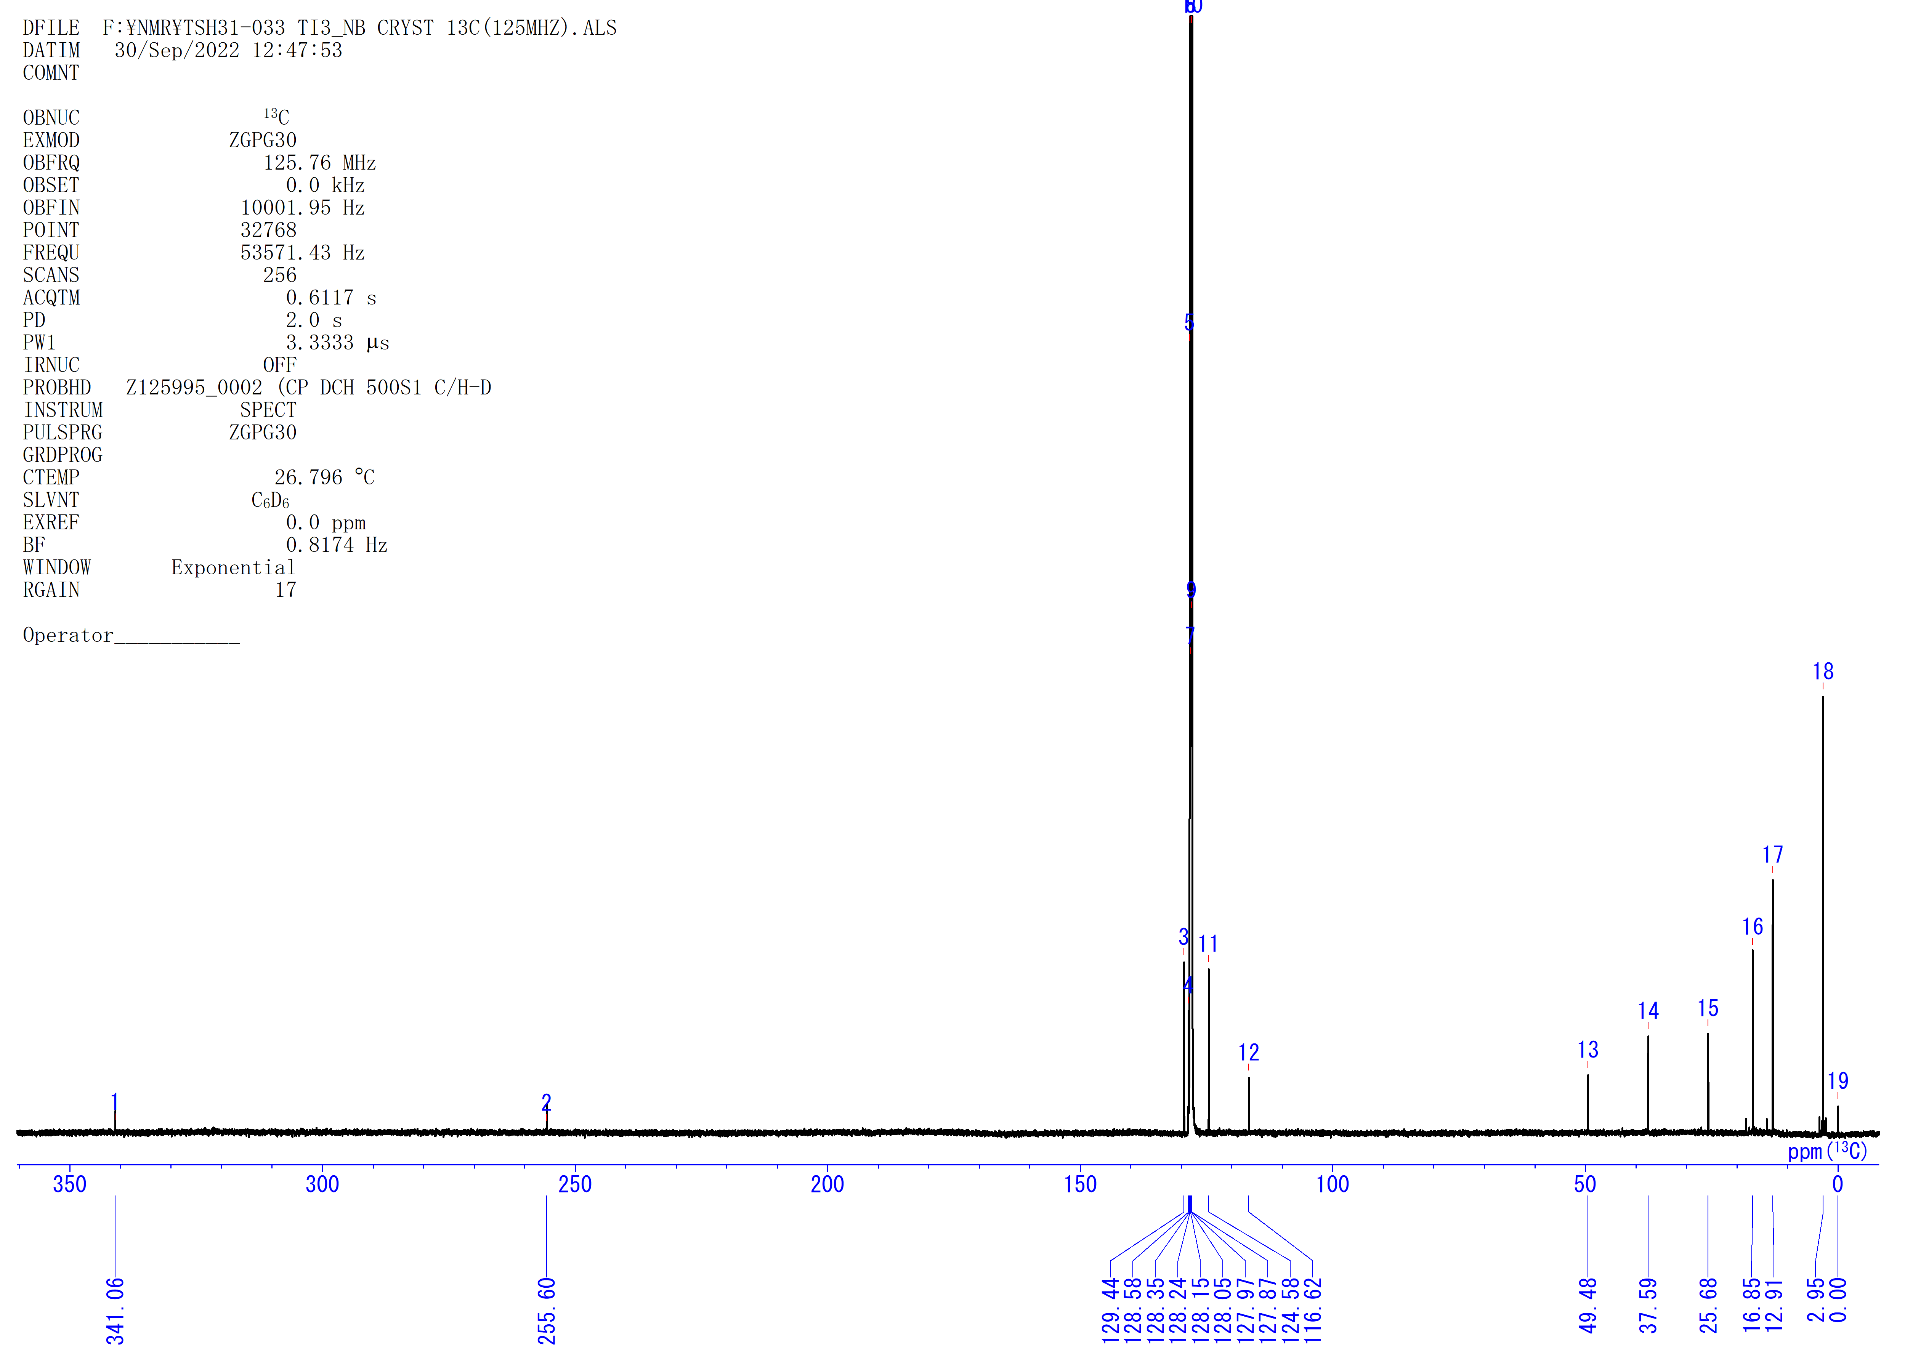
**

**Figure S28.** 13C{1H} NMR spectrum of **4f** (C6D6, rt).

**[{(C5Me4SiMe3)Ti}3(*μ*3-*η*2,*η*3,*η*1-C6H7)(*μ*-H)3(*μ*3-H)] (4g).** **a)** To a 2.0 mL hexane solution of **1** (66 mg, 0.090 mmol) was added cyclohexene (100 ml, 1 mmol) in a sample tube in an Ar glovebox. The solution was kept at 60 °C for 2 days. The solution turned from brown to dark red-brown. After removal of the solvent under vacuum, the oily crude product was crystallized in DME at –30 °C to give dark brown solids of **4g** (44 mg, 0.055 mmol, 61%). Single crystals of **4g** suitable for X-ray diffraction studies were obtained by recrystallization from a DME/benzene solution at –30 °C. **b)** To a 3.0 mL hexane solution of **1** (72 mg, 0.099 mmol) was added 1,3-cyclohexadiene (40 ml, 0.42 mmol) in a sample tube in an Ar glovebox. The solution was kept at room temperature for 2 days. After removal of the solvent under vacuum, the oily crude product was crystallized in DME at –30 °C to give dark brown solids of **4g** (48 mg, 0.059 mmol, 60%). The analogous C5Me4SiMe2*t*Bu-ligated complex [{(C5Me4SiMe2*t*Bu)Ti}3(*m*3-N)(*μ*3-*η*2,*η*3,*η*1-C6H7)(*μ*-H)3(*μ*3-H)] (**4g’**) was obtained from the reaction of [{(C5Me4SiMe2*t*Bu)Ti}3(*m*3-H)(*m*-H)6] (**1’**) with 1,3-cyclohexadiene.

**4g**: 1H NMR (tol-*d*8, rt): *δ* 3.23 (brs, 2H, -C*H*2-), 2.54 (q, *J* = 13.4 Hz, 1H, *μ*3-H), 2.19 (brs, 18H, C5*Me4*SiMe3), 2.01 (brs, 18H, C5*Me4*SiMe3), 1.08 (brs, 4H, -C*H*2-), 0.33 (s, 27H, C5Me4Si*Me3*). 13C{1H} NMR (C6D6, rt): *δ* 245.7 (s, *μ*3-C), 216.2 (s, *μ*2-C), 127.6 (brs, *C*5Me4SiMe3), 123.6 (brs, *C*5Me4SiMe3), 114.4 (brs, *C*5Me4SiMe3), 97.9 (s, -*C*H-), 38.3 (s, -*C*H2-), 32.2 (s, -*C*H2-), 25.4 (s, -*C*H2-), 16.5 (s, C5*Me4*SiMe3), 12.6 (s, C5*Me4*SiMe3), 2.7 (s, C5Me4Si*Me3*). Anal. calcd. for C42H74Si3Ti3: C, 62.52; H, 9.24. Found: C, 61.83; H, 9.01.

**
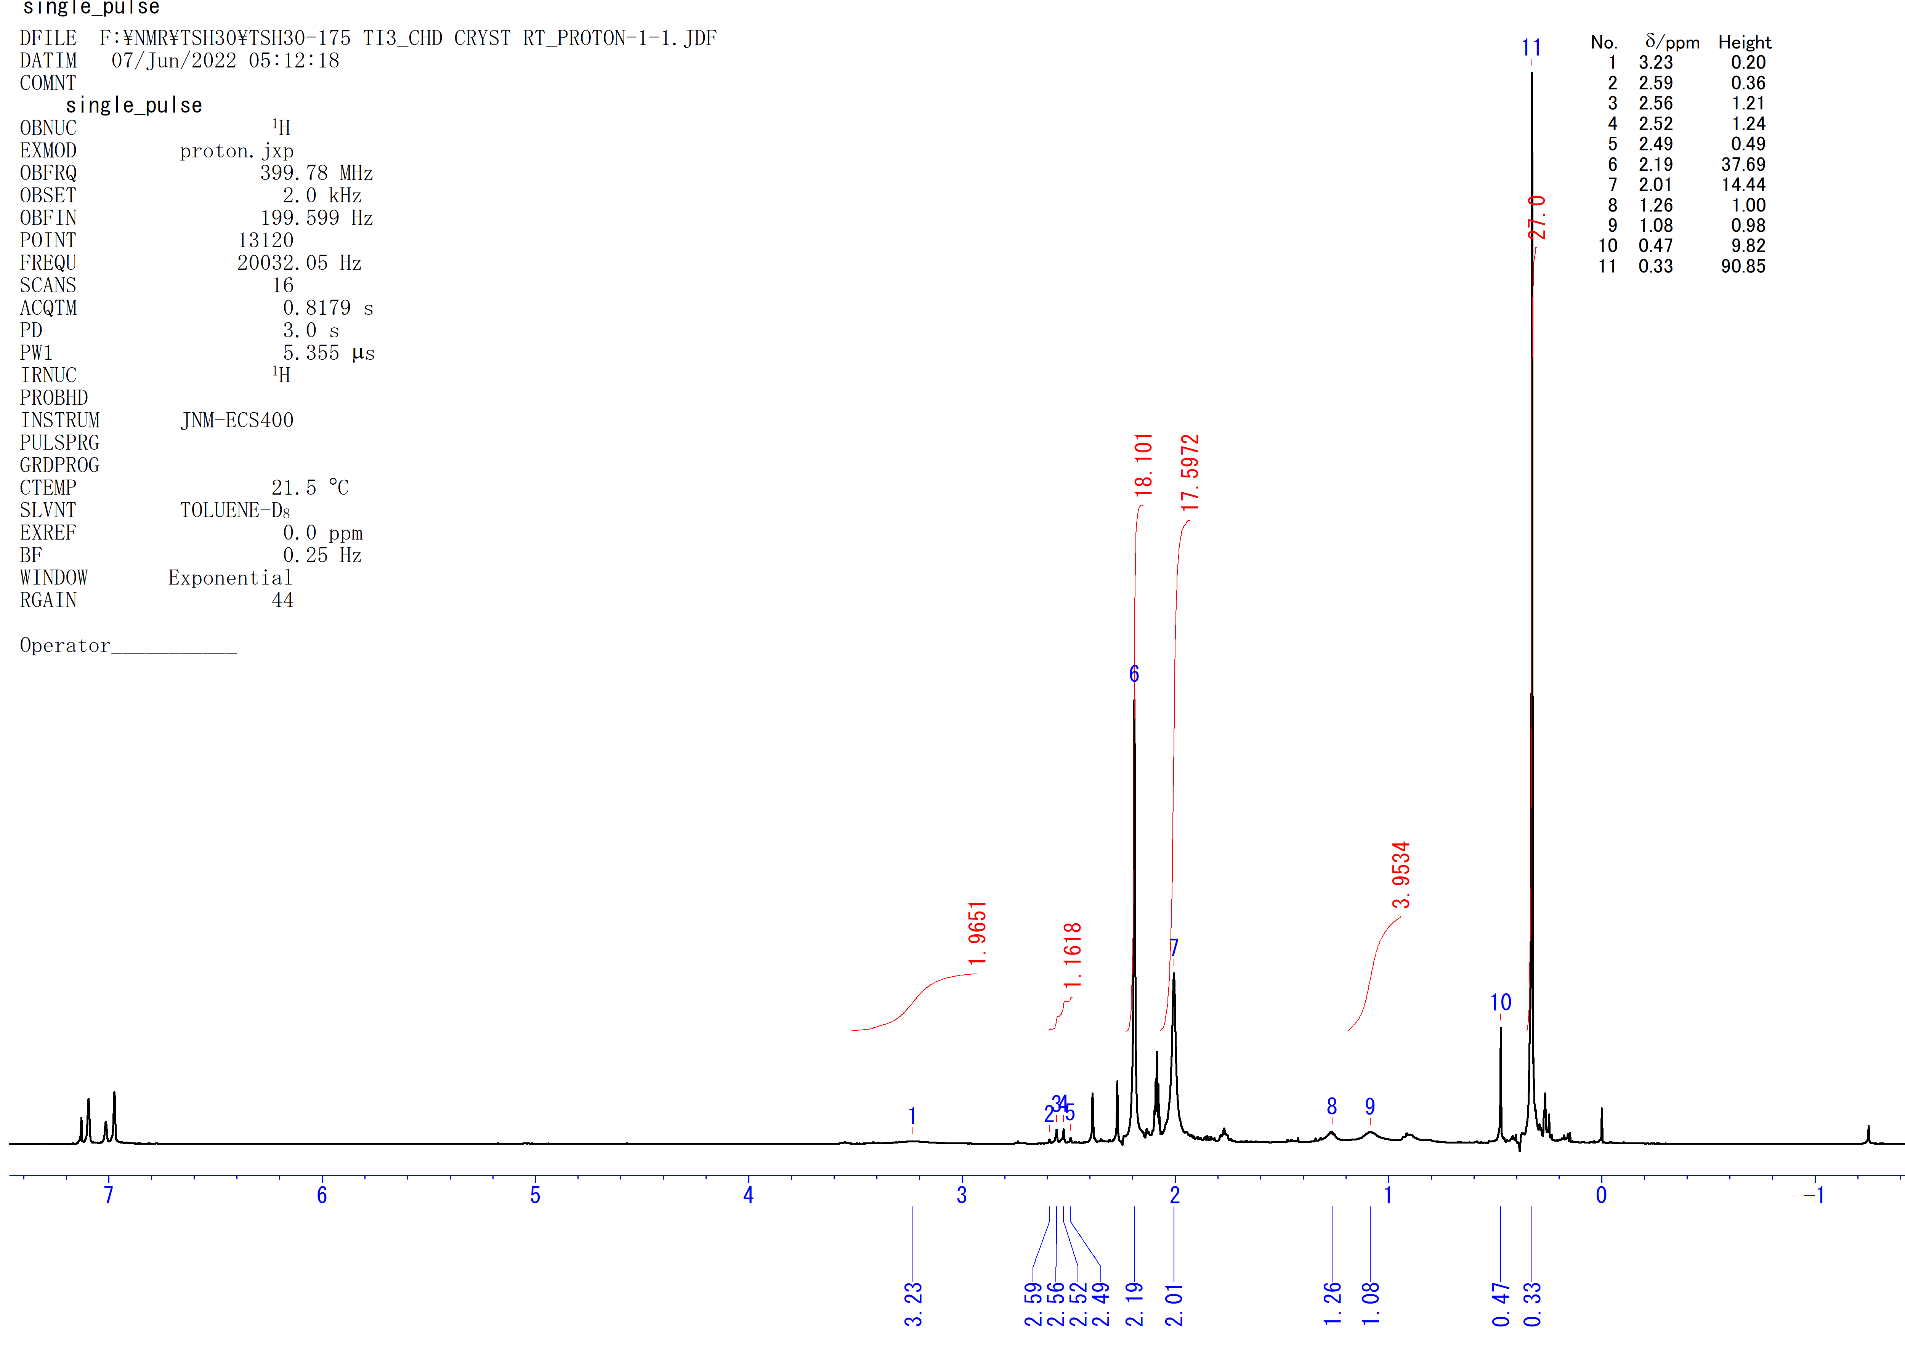
**

**Figure S29.** 1H NMR spectrum of **4g** (toluene-*d*8, rt).

**
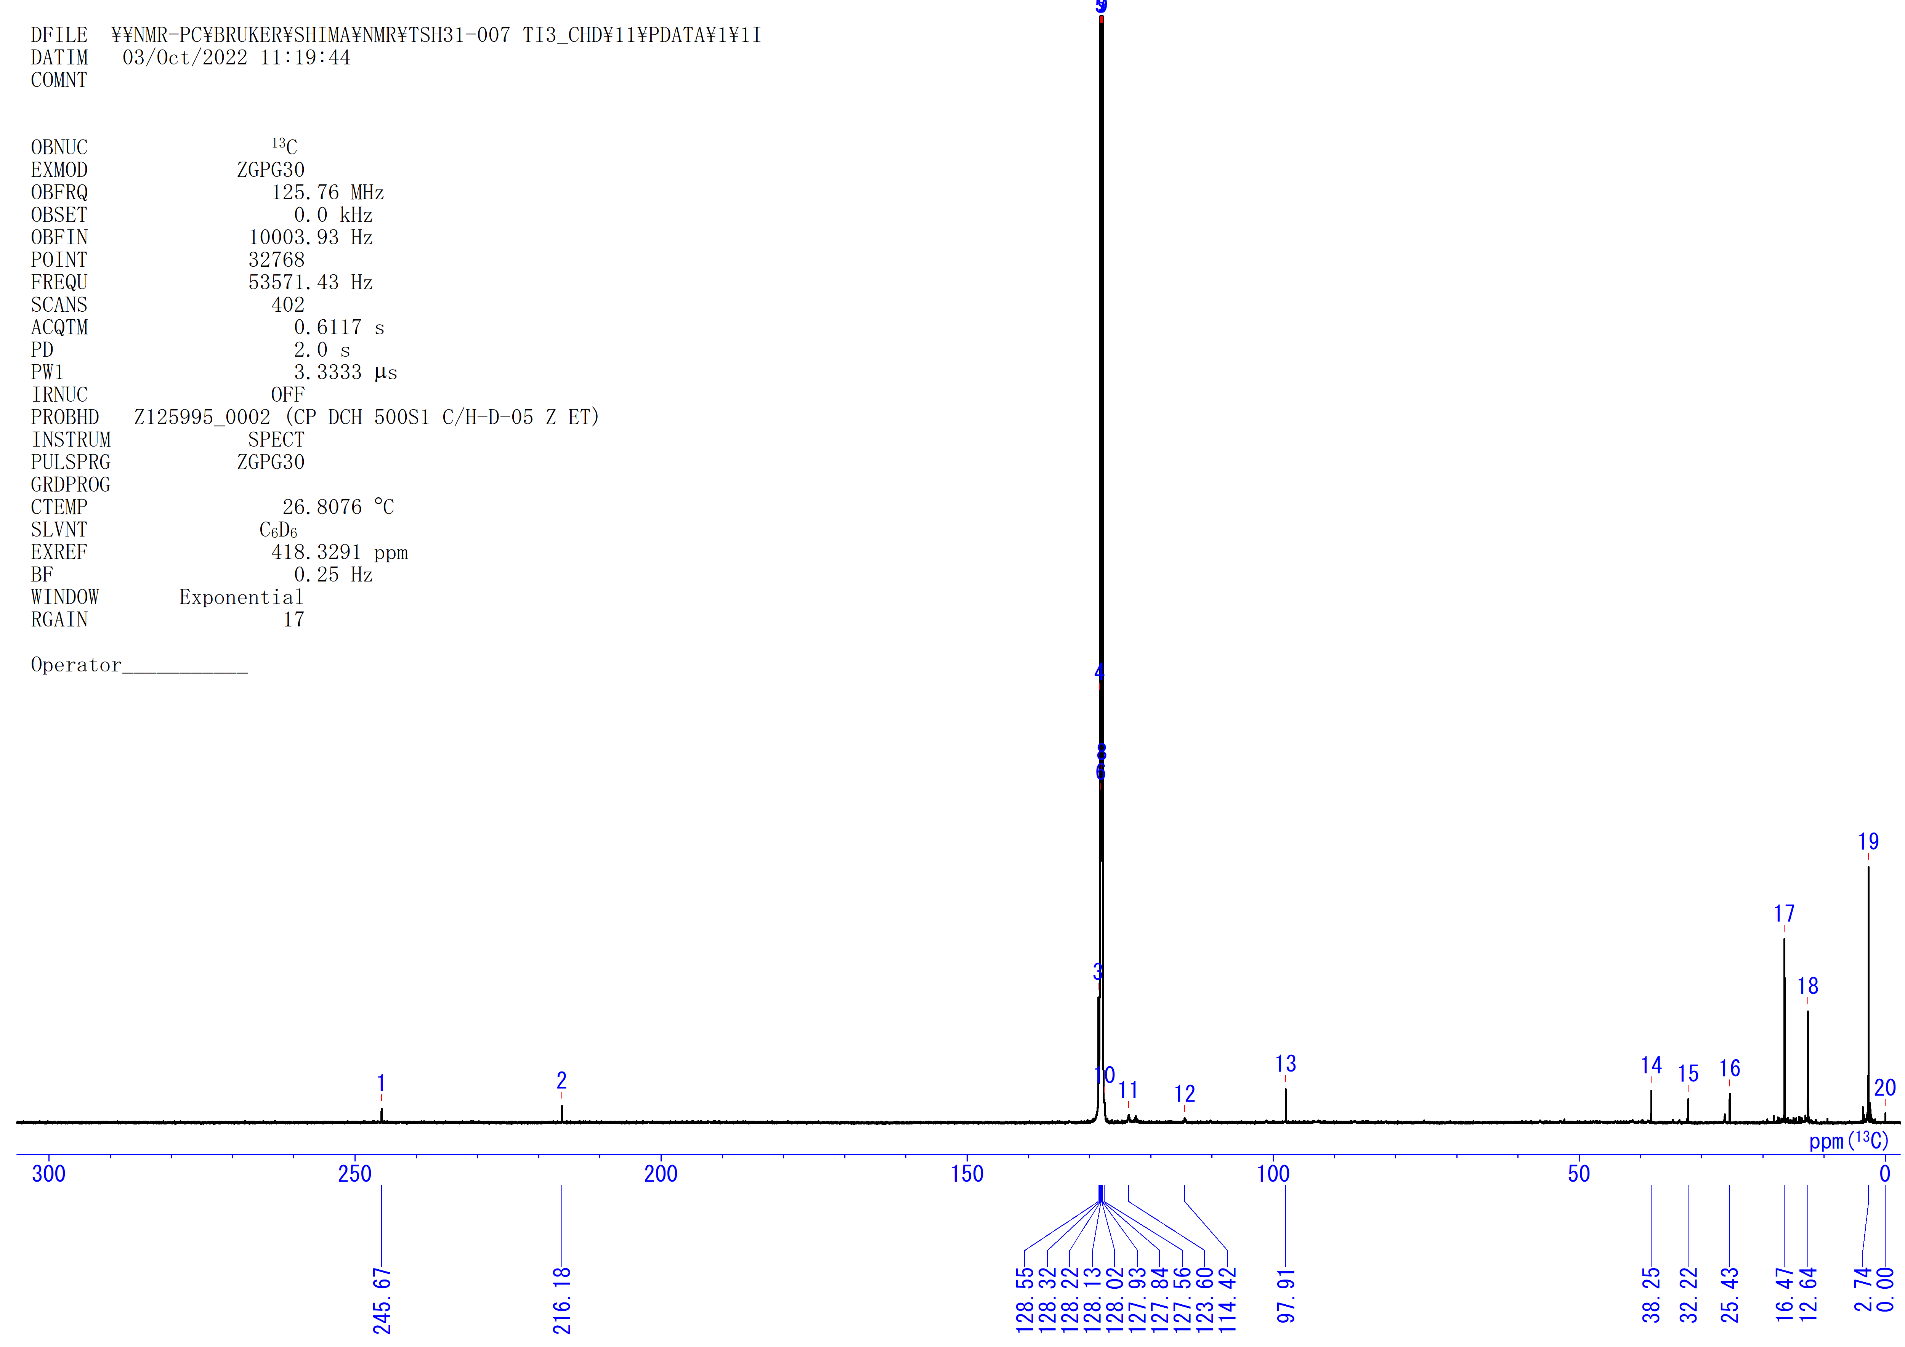
**

**Figure S30.** 13C{1H} NMR spectrum of **4g** (C6D6, rt).

**[{(C5Me4SiMe3)Ti}3(*μ*-*η*3,*η*3,*η*1-CH=C(CH3)N-)(*μ*3-N)(*μ*-H)] (5).** A hexane solution (2.0 mL) of **4a** (41 mg, 0.053 mmol) in 10 mL Hiper Glass Cylinder (TAIATSU TECHNO®) was filled with 10 atm of N2. The solution was stirred at room temperature for 2 days. The color of the solution changed from dark brown to dark purple. After the reaction, the solution was evaporated and the residue was crystallized in DME at –30 °C to give **5** (37 mg, 0.047 mmol, 89%) as dark-purple solid. Single crystals suitable for X-ray diffraction study were obtained from the concentrated DME/C6H6 solution of **5** at –30 °C. The 15N-enriched compound [{(C5Me4SiMe3)Ti}3(*μ*-*η*3,*η*3,*η*1-CH=C(CH3)15N-)(*μ*3-15N)(*μ*-H)] (**5-15N**) was obtained from the reaction of **4a** (11 mg, 0.014 mmol) with 15N2 (1 atm) in C6D6 (0.4 mL) at room temperature for 4 days, which afforded **5-15N** in 87% NMR yield.

**5**: 1H NMR (C6D6, rt): *δ* 7.53 (s, 1H, =C*H*-), 2.90 (s, 3H, C5*Me4*SiMe3 or Me), 2.58 (s, 3H, C5*Me4*SiMe3 or Me), 2.54 (s, 3H, C5*Me4*SiMe3 or Me), 2.44 (s, 3H, C5*Me4*SiMe3 or Me), *2.44 (s, 1H, *m*-H), 2.29 (s, 3H, C5*Me4*SiMe3 or Me), 2.26 (s, 3H, C5*Me4*SiMe3 or Me), 2.173 (s, 3H, C5*Me4*SiMe3 or Me), 2.169 (s, 3H, C5*Me4*SiMe3 or Me), 2.06 (s, 3H, C5*Me4*SiMe3 or Me), 1.80 (s, 3H, C5*Me4*SiMe3 or Me), 1.63 (s, 3H, C5*Me4*SiMe3 or Me), 1.53 (s, 6H, C5*Me4*SiMe3), 0.28 (s, 9H, C5Me4Si*Me3*), 0.16 (s, 18H, C5Me4Si*Me3*). 13C{1H} NMR (C6D6, rt): *δ* 191.8 (s, Ca), 130.8, 130.4, 130.0, 126.5, 126.4, 126.29, 126.25, 126.0, 125.5 (s, *C5*Me4SiMe3), 124.5 (s, Cb), 122.7, 122.3, 122.2, 117.5, 116.6, 115.7 (s, *C5*Me4SiMe3), 27.1 (s, Me), 17.3, 17.0, 16.2, 16.0, 15.4, 13.2, 12.8, 12.4, 11.9, 11.7, 11.5 (s, C5*Me4*SiMe3), 2.4, 2.3 (s, C5Me4Si*Me3*). Anal. calcd. for C39H68N2Si3Ti3: C, 59.08; H, 8.64; N, 3.53. Found: C, 59.45; H, 8.66; N, 2.42.

**5-15N**: 13C{1H} NMR (C6D6, rt): *δ* 191.7 (s, Ca), 124.5 (d, *J*15NC = 15.0 Hz, Cb), 27.1 (d, *J*15NC = 5.3 Hz, Me). 15N NMR (C6D6, rt): *δ* 431.3 (s, *m*3-15N), 177.2 (s, *m*2-15N-C).

**
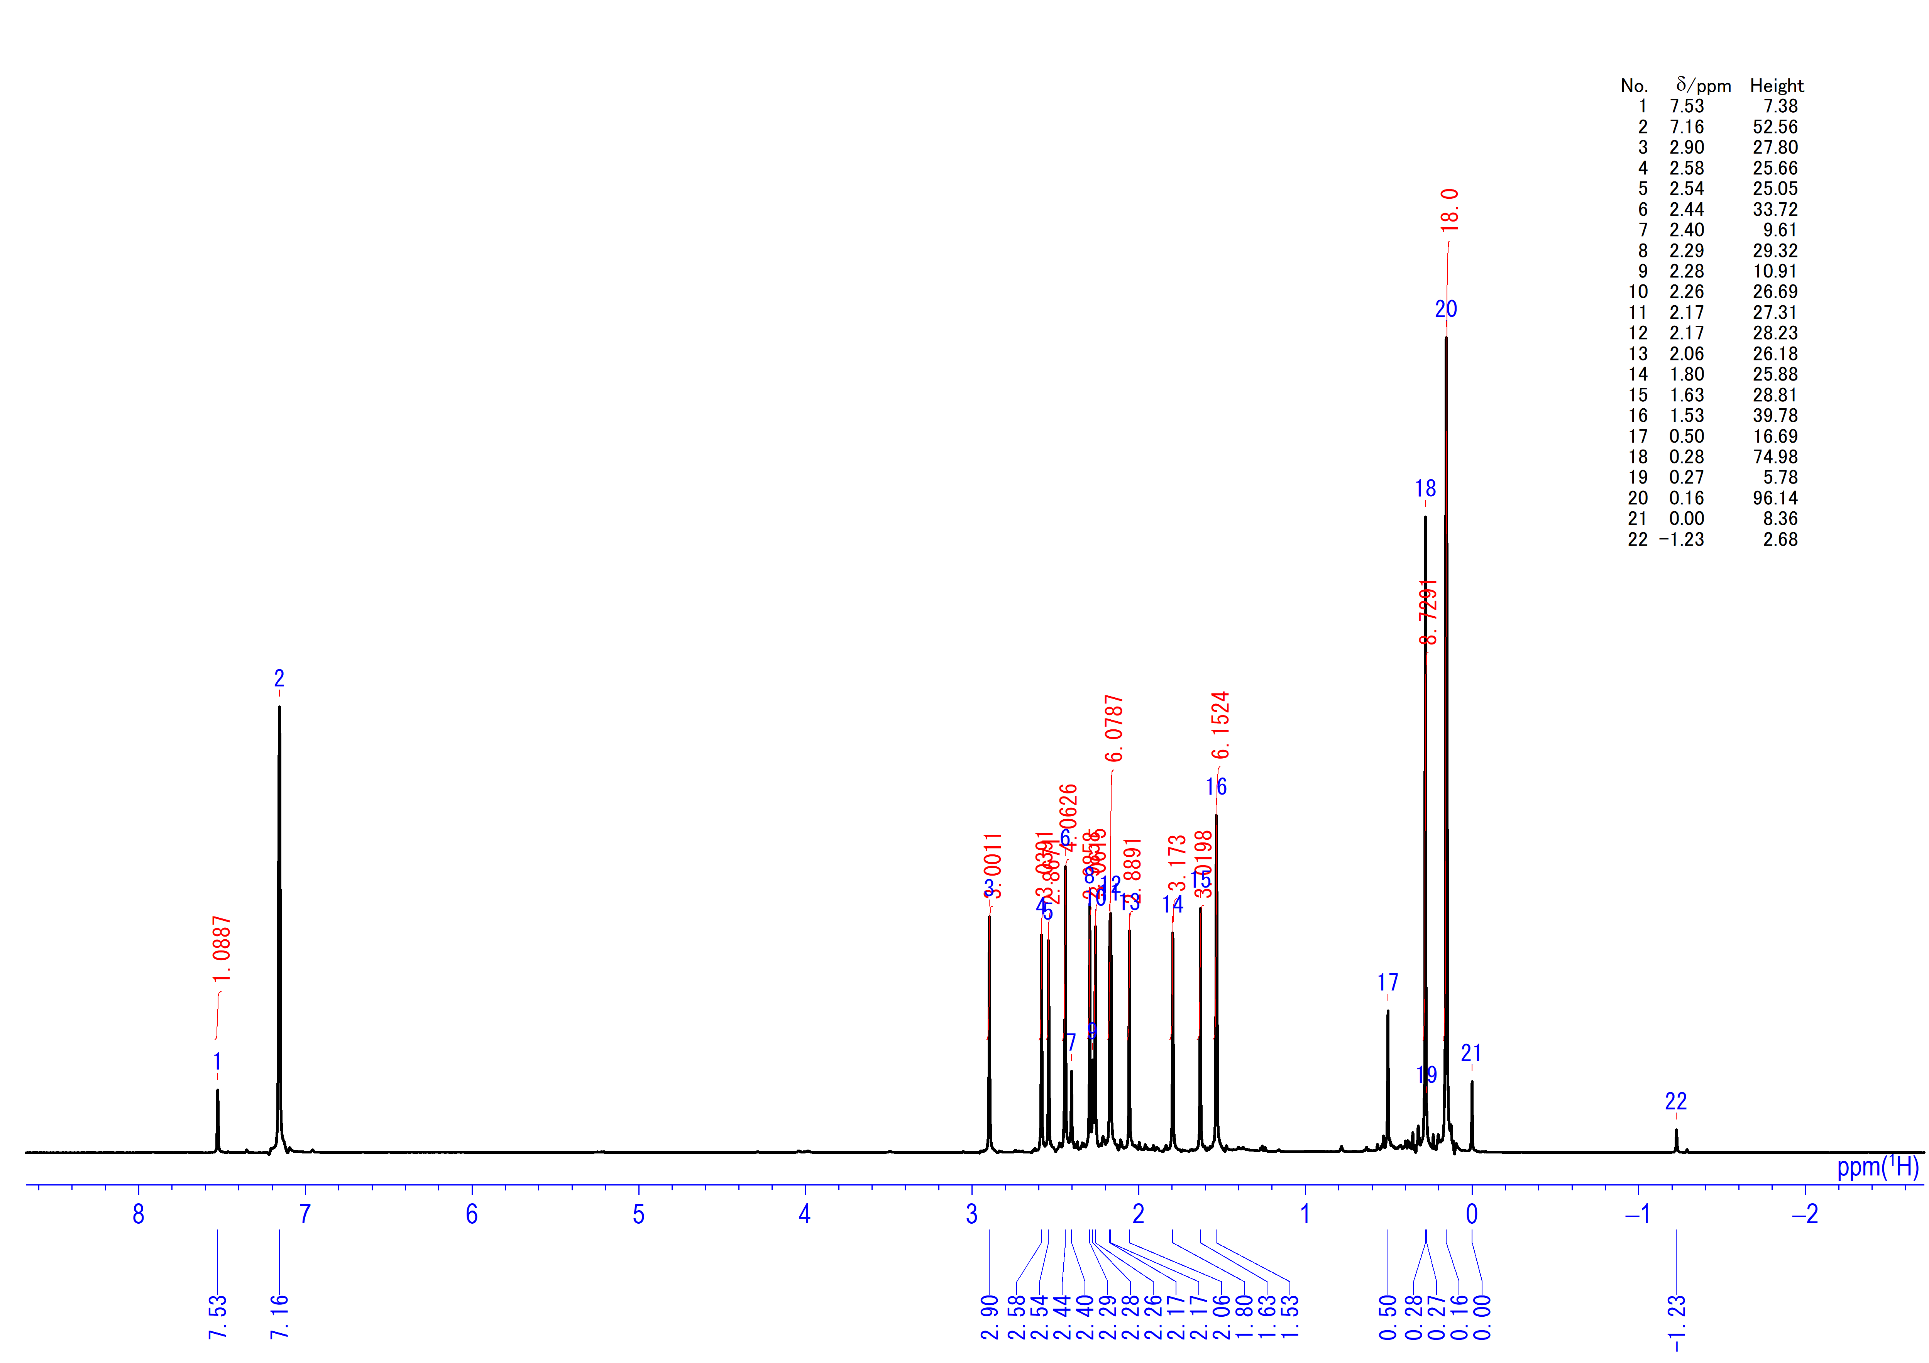
**

**Figure S31.** 1H NMR spectrum of **5** (C6D6, rt)

**
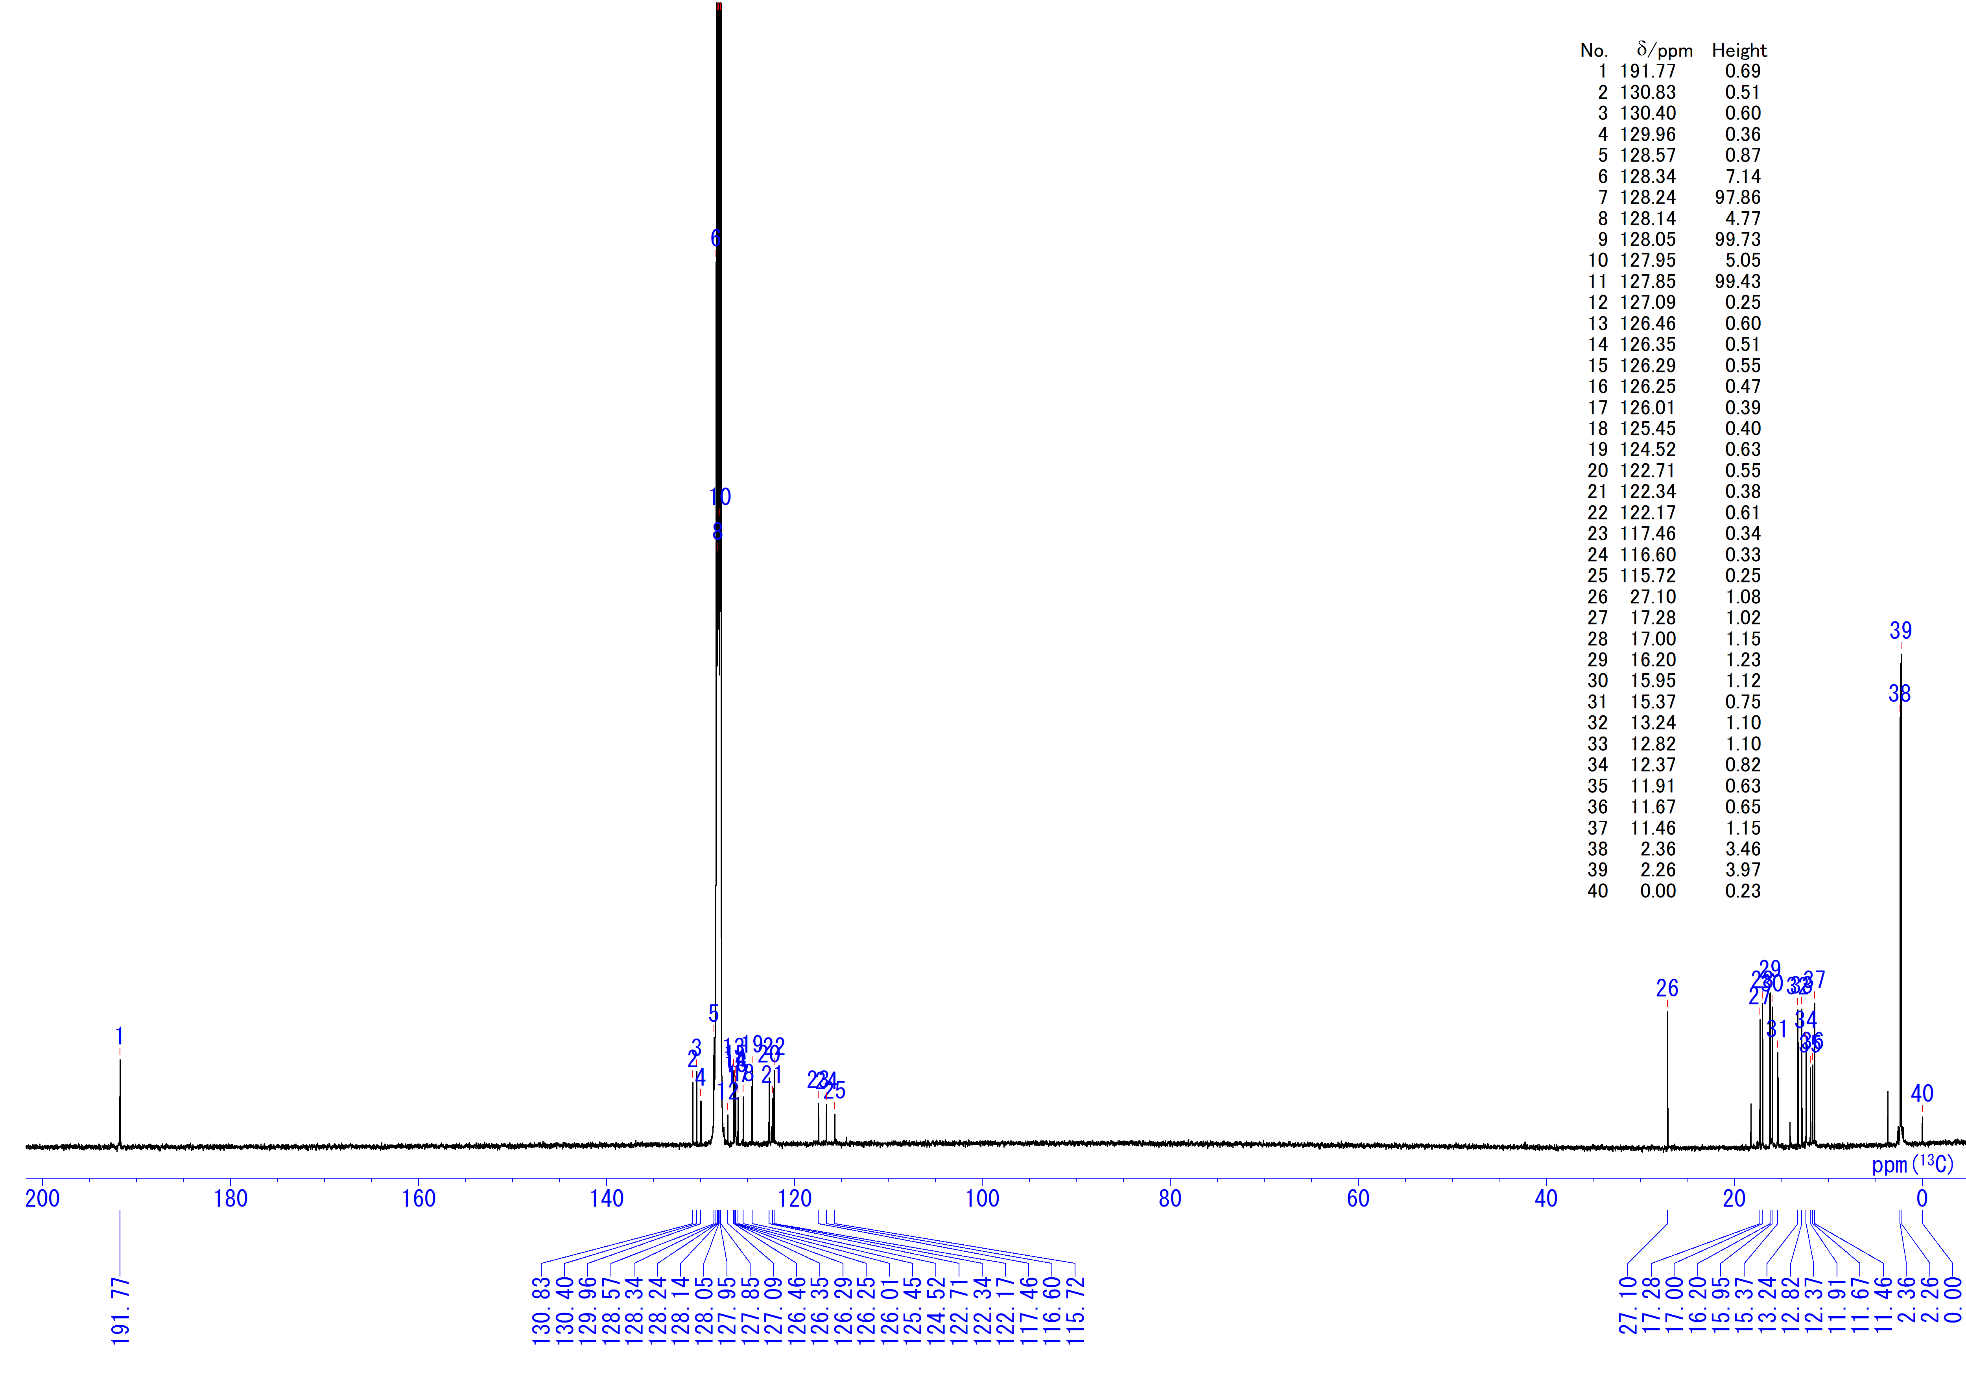
**

**Figure S32.** 13C{1H} NMR spectrum of **5** (C6D6, rt).

**
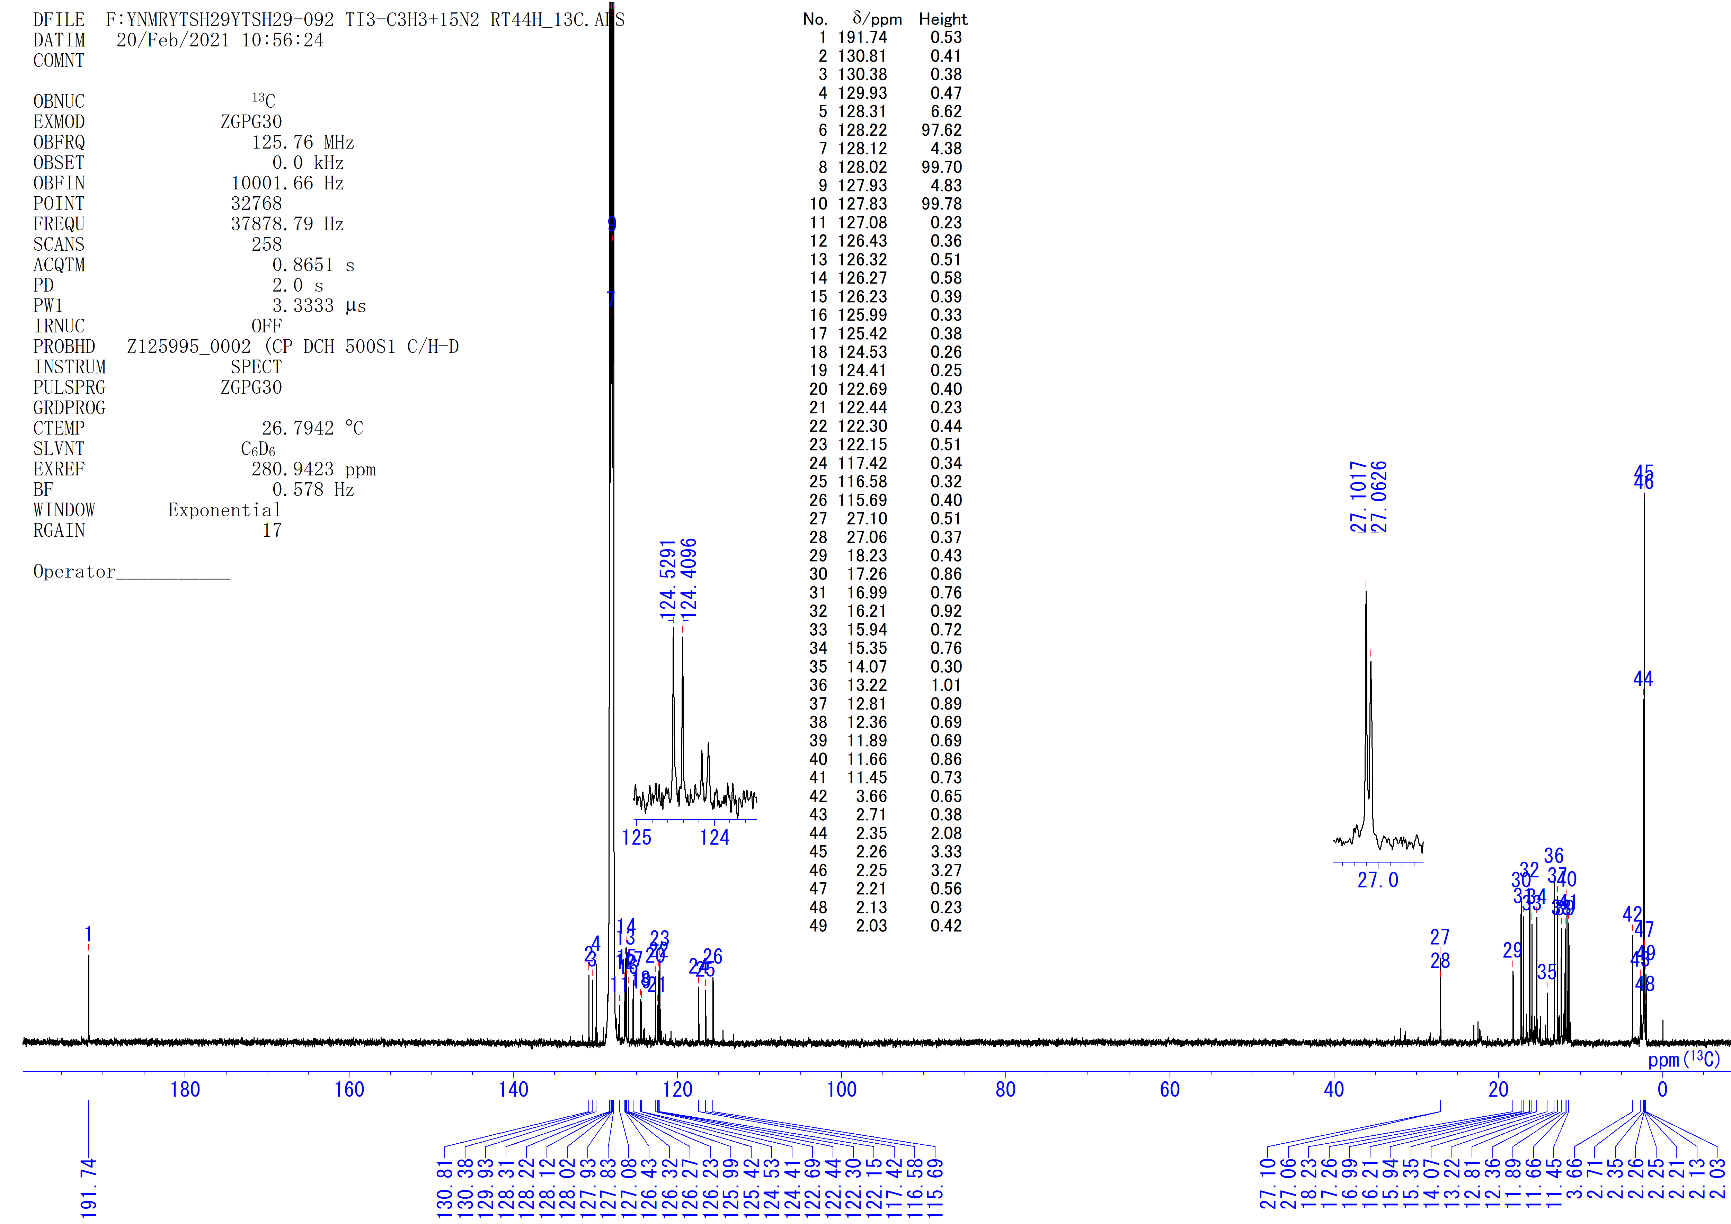
**

**Figure S33.** 13C{1H} NMR spectrum of **5-15N** (C6D6, rt).

**
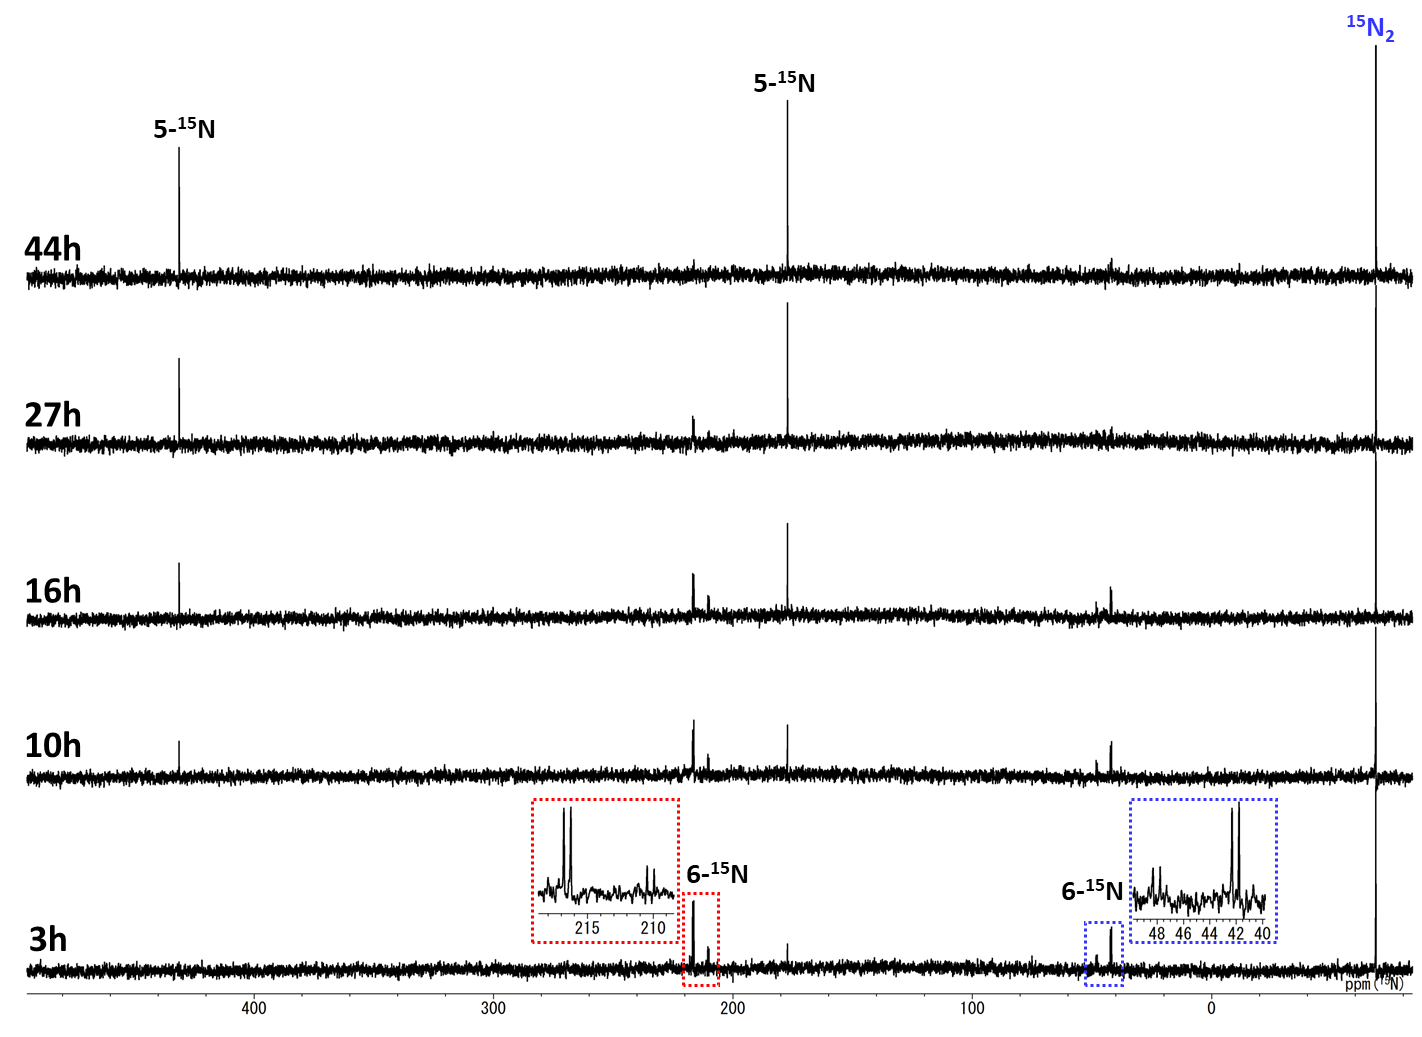
**

**Figure S34.** 15N NMR monitoring of the reaction of **4a** with 15N2 in C6D6 (rt).

**Reaction of 4a-*d*4 with N2.**

A J. Young valve NMR sample tube was charged with 0.4 mL of C6D6 and complex **4a** (6 mg). The solution was frozen in liquid nitrogen, degassed and 1 atm of D2 gas was added. The solution was kept at room temperature for 30 min and the 1H NMR monitoring showed quantitative formation of the deuterated complex [{(C5Me4SiMe3)Ti}3(*μ*3-*η*2:*η*2:*η*1-C=CCH3)(*μ*-D)3(*μ*3-D)] (**4a-*d*4**). After the confirmation of the deuteration, the solution was frozen in liquid nitrogen, degassed and 1 atm of N2 gas was added. The reaction was monitored at room temperature by 1H NMR. After 4 days, the partially deuterated complex [{(C5Me4SiMe3)Ti}3(*μ*-*η*3,*η*3,*η*1-CD=C(CH3)N-)(*μ*3-N)(*μ*-D)] (**5-*d*2**) was obtained.

**5-*d*2**: 2H NMR (C6H6, rt): *δ* 7.6 (s, Ca-D), 2.4 (s, *m*-D).


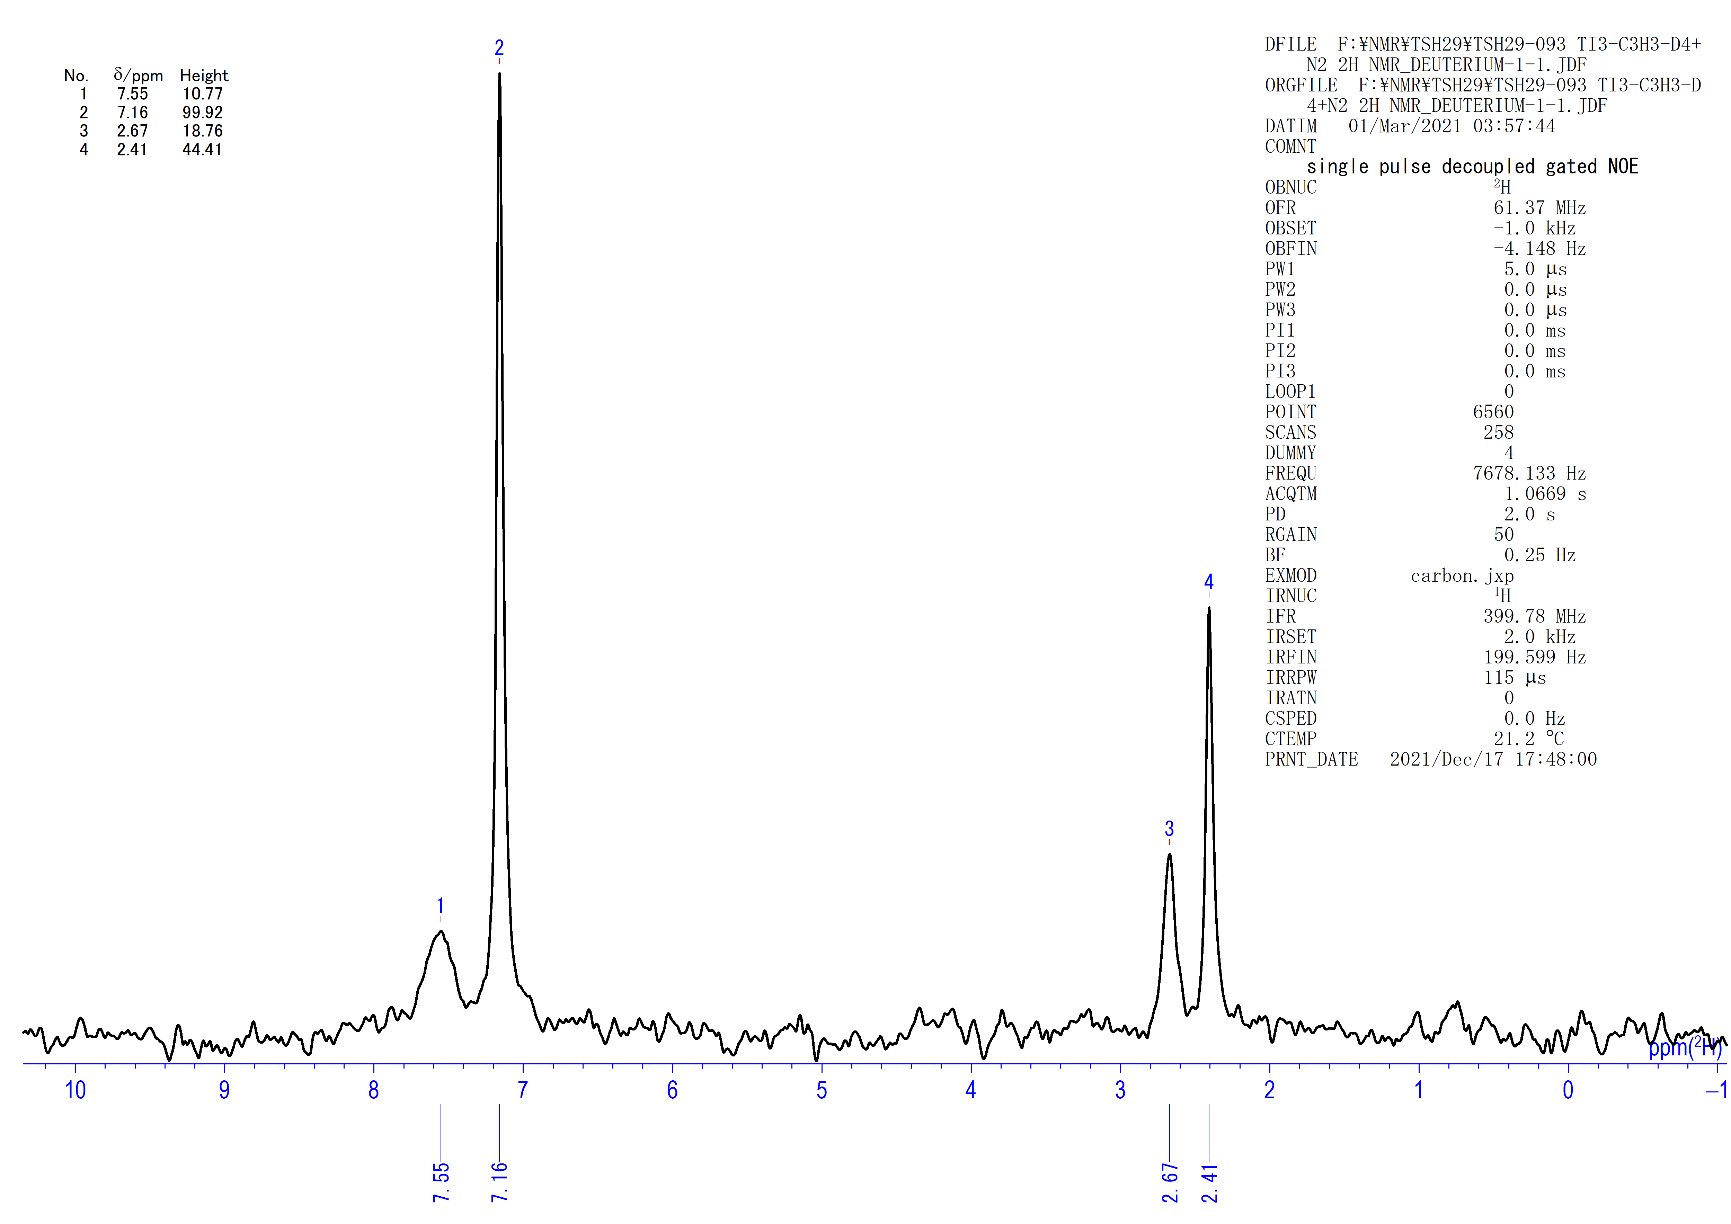


**Figure S35.** 2H NMR spectrum of **5-*d*** (C6H6, rt, *d*H 2.7…**8a-*d***).

**[{(C5Me4SiMe3)Ti}3(*μ*-*η*2,*η*2,*η*1-CH=CCH3)(*μ*-*η*2,*η*2,*η*1-N2)(*μ*-H)] (6).** **a)** In the N2 glovebox, **4a** (19 mg, 0.025 mmol) was dissolved in THF (1.0 mL) at –30 °C under N2 (1 atm). After 1 day at –30 °C, the solution was evaporated and dissolved in small amount of DME and crystalized at –30 °C. After a few days, microcrystalline precipitates of **6** (11 mg, 0.014 mmol, 56%) were formed as dark brown solid. Single crystals of **6** suitable for X-ray study were obtained from DME solution at –30 °C. **b)** A 5-mm pressure NMR tube (Wilmad Lab Glass) was charged with **4a** (5.0 mg, 0.0065 mmol) and C6D6 (0.40 ml, 9.8 mM) in a glovebox. The solution was degassed under vacuum. High pressure N2 gas (5 atm) was then introduced to the NMR tube. The sample was monitored at room temperature by 1H NMR spectroscopy. After 20 minutes, complex **4a** was disappeared and complex **6** was quantitatively formed. Complex **6** was slowly converted to **5** at room temperature for 2 days. The 15N-labeled complex [{(C5Me4SiMe3)Ti}3(*μ*-*η*2,*η*2,*η*1-CH=CCH3)(*μ*-*η*2,*η*2,*η*1-15N2)(*μ*-H)] (**6-15N**) was observed when the reaction of **4a** with 15N2 (1 atm) in C6D6 was monitored by 15N NMR.

**6**: 1H NMR (C6D6, rt): *δ* 9.14 (s, 1H, =C*H*-), 2.62, 2.41, 2.39, 2.35, 2.18, 2.17, 2.11, 2.02, 1.95, 1.81, 1.48, 1.40, 1.27 (s, 3H×13, C5*Me4*SiMe3 or Me), 0.57 (s, 9H, C5Me4Si*Me3*), 0.38 (s, 9H, C5Me4Si*Me3*), 0.20 (s, 9H, C5Me4Si*Me3*), –4.07 (s, 1H, *m*-H). 13C{1H} NMR (C6D6, rt): *δ* 269.6 (s, -MeC=*C*H-), 217.9 (s, -Me*C*=CH-), 131.6, 129.8, 129.0, 127.2, 126.4, 124.2, 124.1, 123.5, 122.7, 122.4, 122.0, 121.5, 120.8, 113.2 (s, *C5*Me4SiMe3), 22.5 (s, Me), 16.6, 15.6, 15.4, 15.3, 15.1, 14.9, 12.7, 12.6, 12.1, 12.0, 11.3, 11.2 (s, C5*Me4*SiMe3), 2.7, 2.2, 2.0 (s, C5Me4Si*Me3*). **6-15N**: 15N NMR (C6D6, rt): major *d* 216.5 (d, *J*NN = 21.8 Hz, 15N-15N), 42.1 (d, *J*NN = 21.8 Hz, 15N-15N); minor *d* 210.2 (d, *J*NN = 21.7 Hz, 15N-15N), 48.0 (d, *J*NN = 21.7 Hz, 15N-15N).


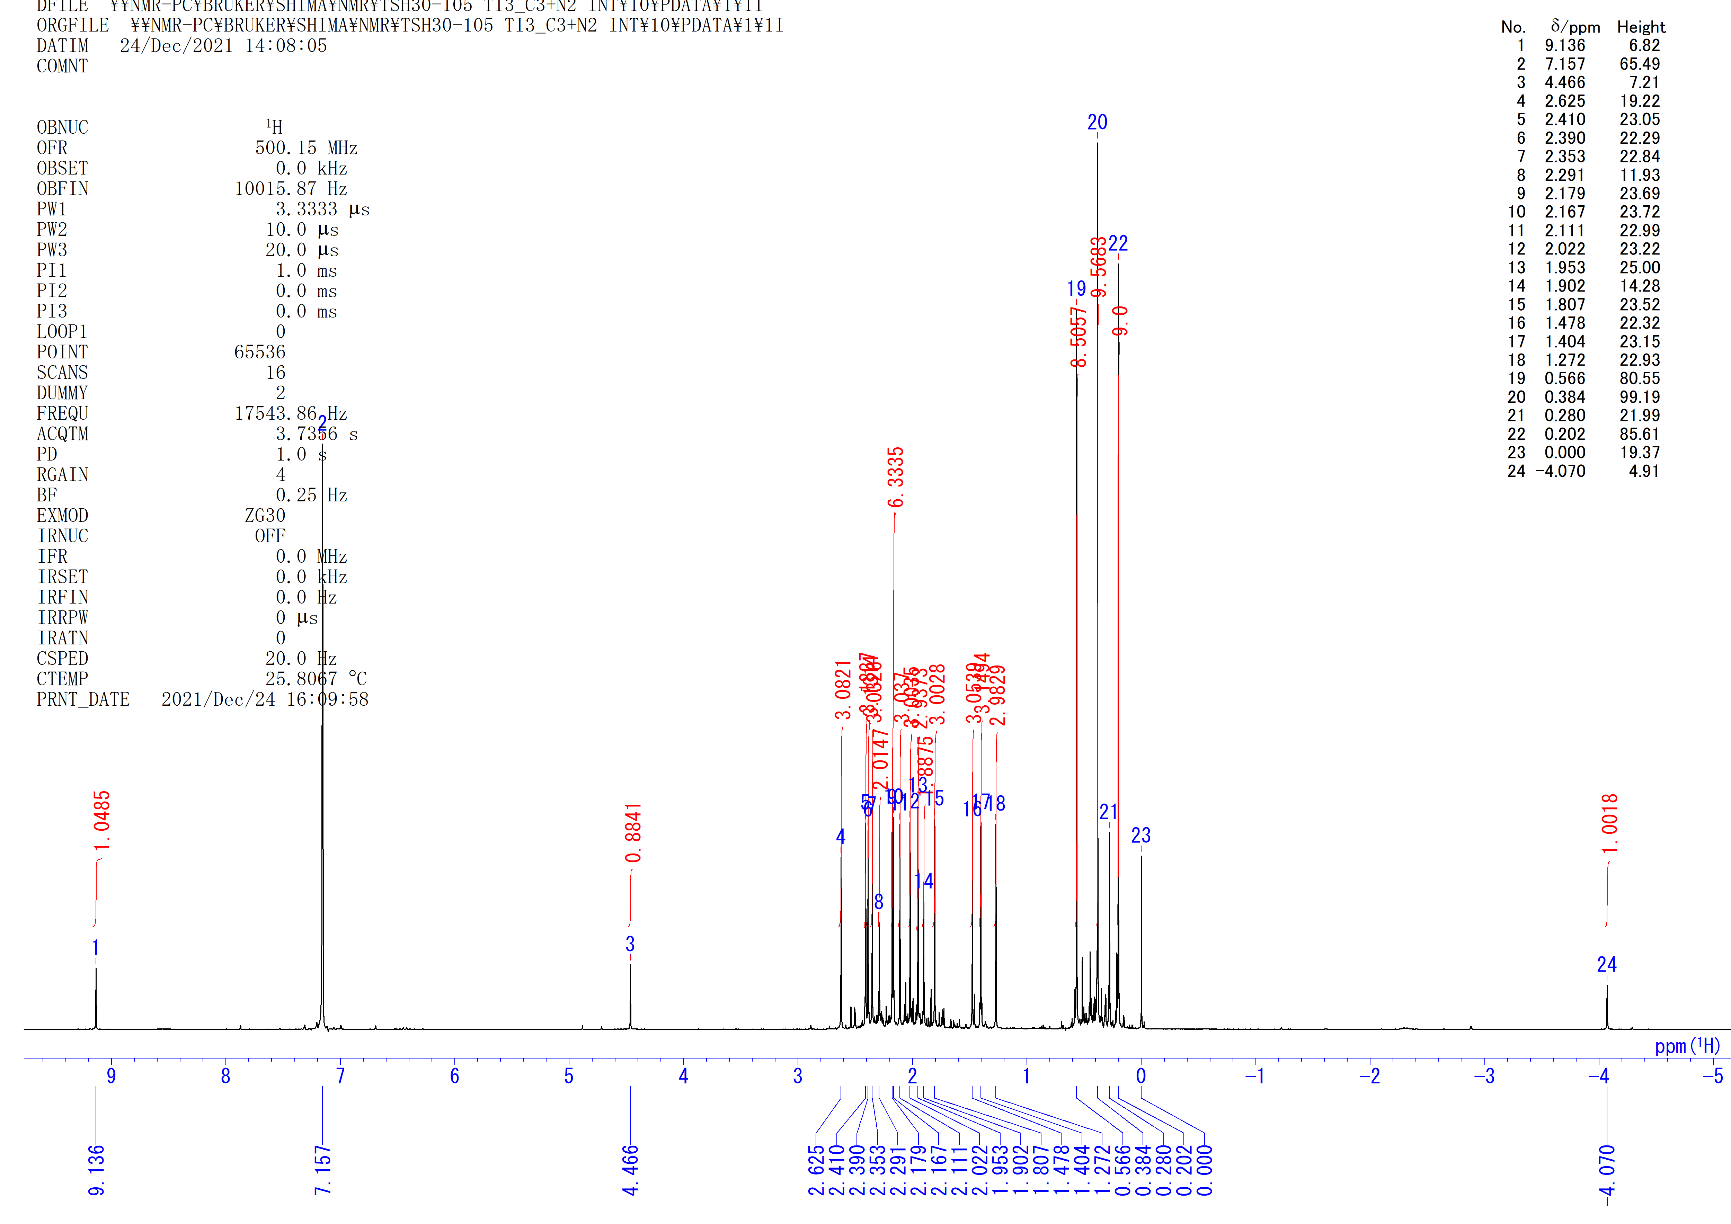


**Figure S36.** 1H NMR spectrum of **6** (C6D6, rt).


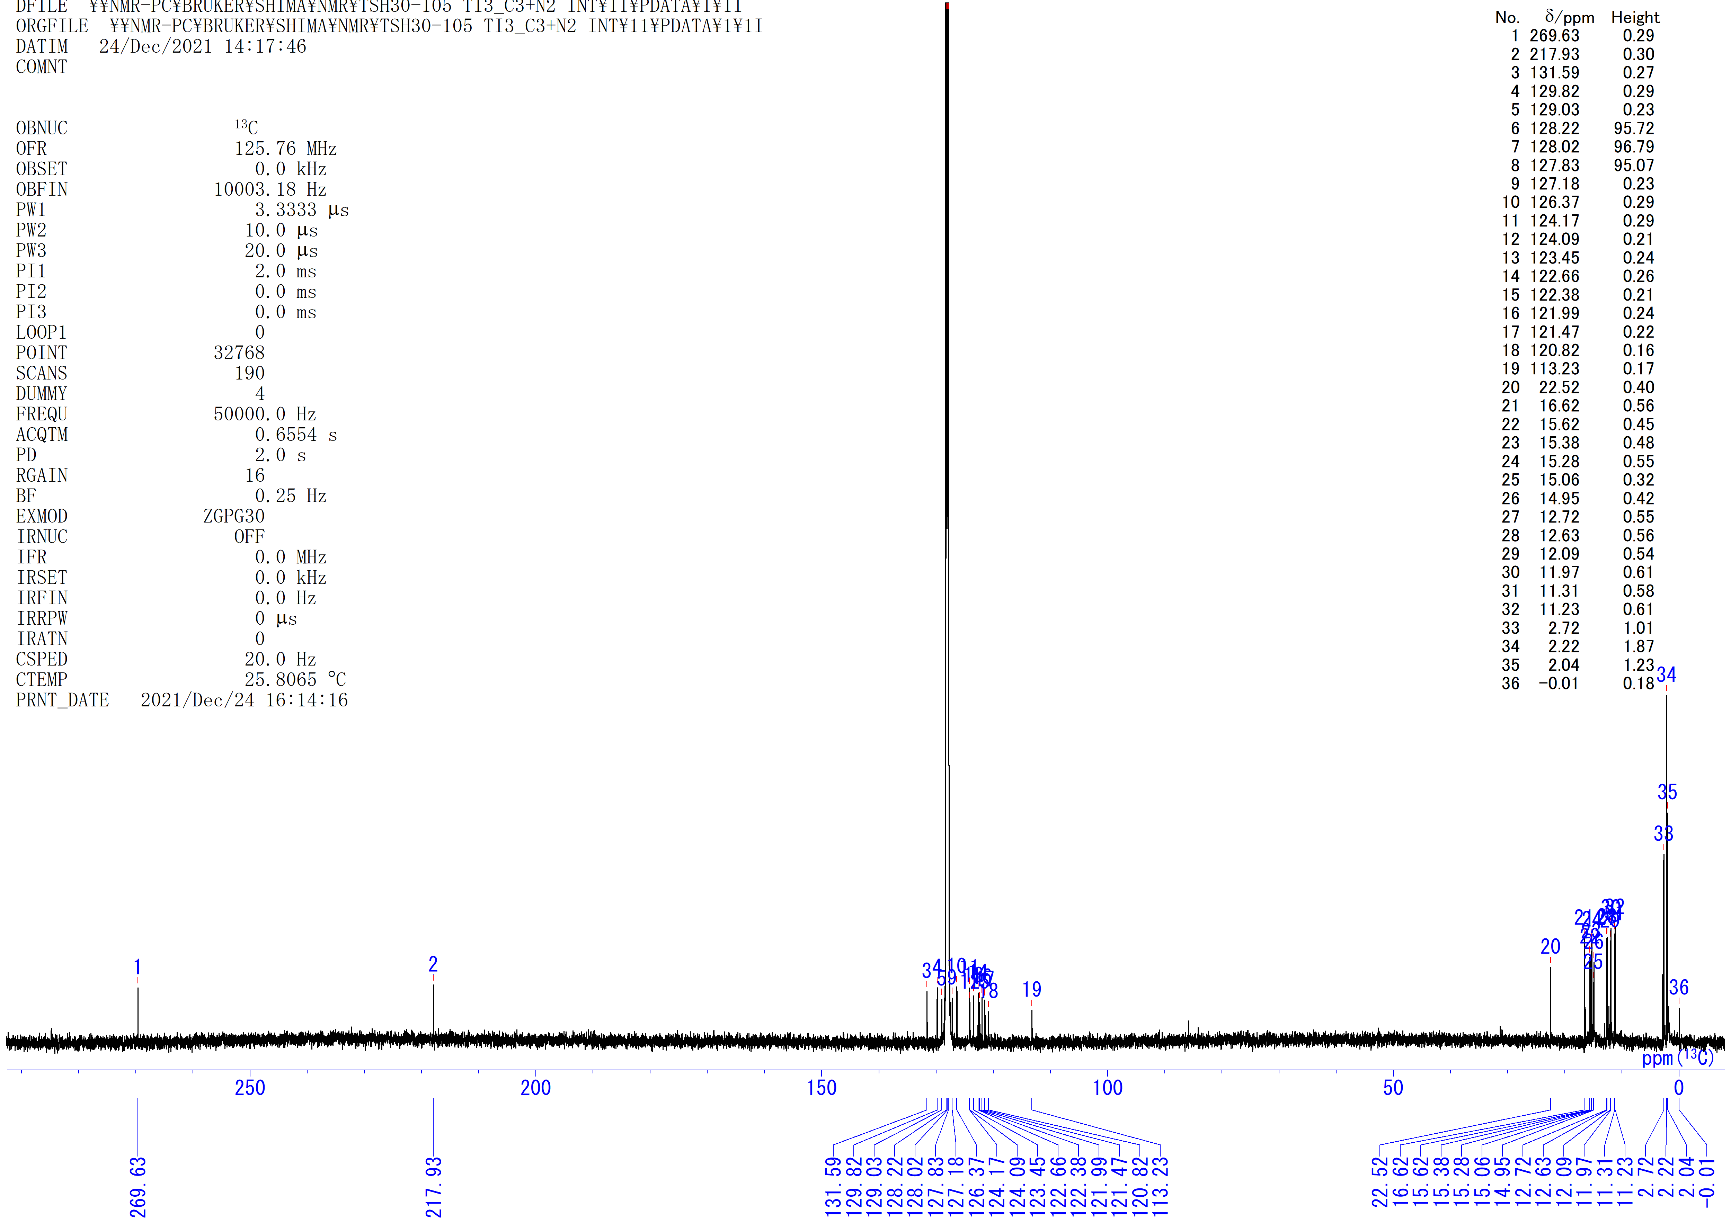


**Figure S37.** 13C{1H} NMR spectrum of **6** (C6D6, rt).

**Thermal reaction of 5-*d*.** A J. Young valve NMR sample tube was charged with 0.4 mL of C6D6 and complex **5** (5 mg). The solution was frozen in liquid nitrogen, degassed and 1 atm of D2 gas was added. The solution was kept at room temperature for 15 min and the 1H NMR monitoring showed quantitative formation of the deuterated complex [{(C5Me4SiMe3)Ti}3(*μ*-*η*3,*η*3,*η*1-CH=C(CH3)N-)(*μ*3-N)(*μ*-D)] (**5-*d***). After the confirmation of the deuteration, the solution was frozen in liquid nitrogen, degassed and 1 atm of N2 gas was added. The reaction was kept at 70 °C. After 1 day, the partially deuterated complex [{(C5Me4SiMe3)Ti}3(*μ*-*η*3,*η*1,*η*1-CH=CH0.5D0.5-CH2-)(*μ*3-N)(*μ*-NH)] (**3-*d***) was obtained quantitatively by the 1H NMR.

**3-*d***: 1H NMR (C6D6, rt): *δ* 14.97 (s, 1H, N*H*), 7.72 (d, *J* = 6.1 Hz, 1H, -C*H*=CH0.5D0.5-CH2-), 5.21 (d, *J* = 4.8 Hz, 1H, -CH=CH0.5D0.5-C*H*2-), 4.01 (m, 0.5H, -CH=C*H*0.5D0.5-CH2-).

**3-*d***: 2H NMR (C6H6, rt): *δ* 4.1 (s, *m*-CH=CH0.5*D*0.5-CH2-).


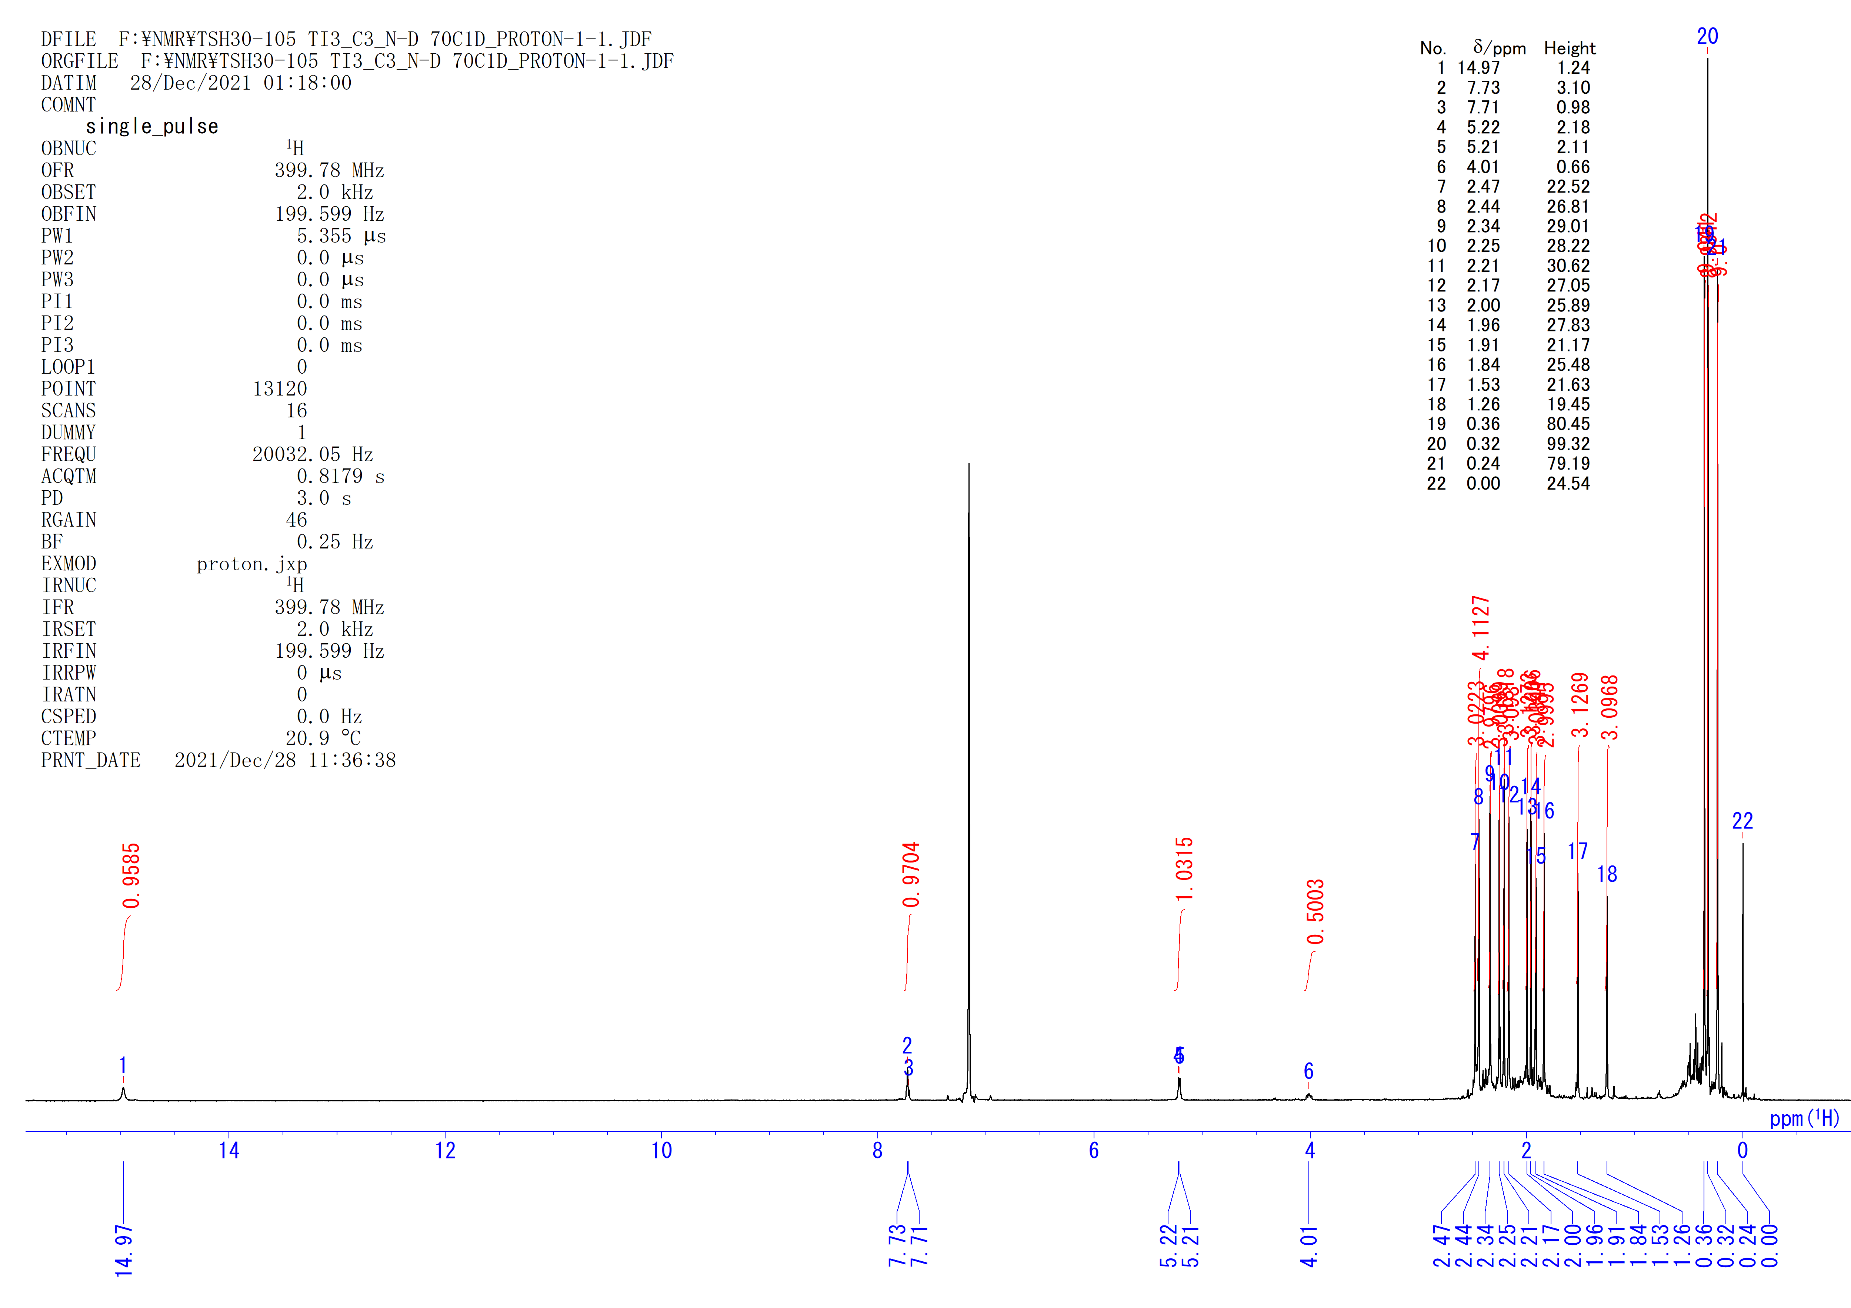


**Figure S38.** 1H NMR spectrum of **3-*d*** (C6D6, rt).


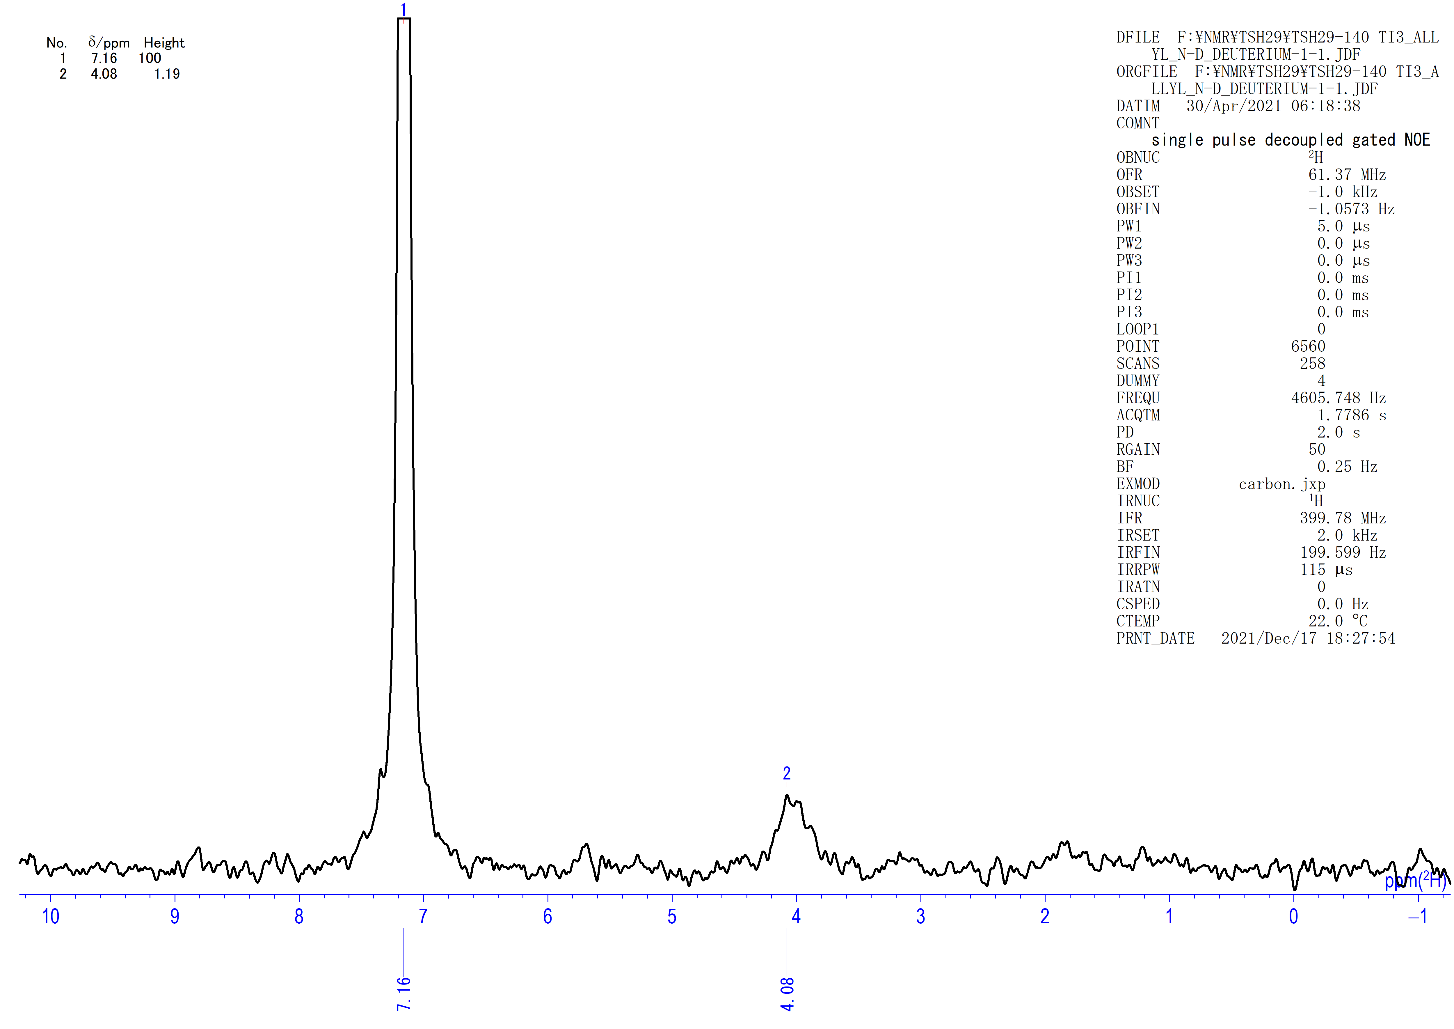


**Figure S39.** 2H NMR spectrum of **3-*d*** (C6H6, rt).

**[{(C5Me4SiMe3)Ti}3(*μ*3-N)(*μ*-NCH(CH3)2)(*μ*-H)2] (8a).** A hexane solution (3.0 mL) of **5** (100 mg, 0.126 mmol) in 10 mL Hiper Glass Cylinder (TAIATSU TECHNO®) was filled with 4 atm of H2. The solution was kept at room temperature for 1 day with stirring. After the reaction, the solution was evaporated and the residual dark brown powder was crystallized in DME at –30 °C to precipitate **8a** (83 mg, 0.104 mmol, 83%) as a black crystalline solid. Single crystals of **8a** suitable for X-ray study were obtained from DME/benzene solution at –30 °C.

**8a**: 1H NMR (C6D6, rt): *δ* 16.63 (s, 6H, C5*Me4*SiMe3), 9.25 (s, 6H, C5*Me4*SiMe3), 7.91 (s, 6H, C5*Me4*SiMe3), 5.25 (s, 6H, C5*Me4*SiMe3), 3.98 (s, 6H, C5*Me4*SiMe3), 3.49 (s, 6H, C5*Me4*SiMe3), 2.72 (s, 6H, -CH*Me2*), 1.16 (s, 9H, C5Me4Si*Me3*), 0.79 (s, 18H, C5Me4Si*Me3*), –2.57 (s, 1H, -C*H*Me2). Anal. calcd. for C39H72N2Si3Ti3: C, 58.78; H, 9.11; N, 3.51. Found: C, 60.22; H, 9.12; N, 3.53. FD-MS: *m/z* = 796.4 ([**8a**]+).


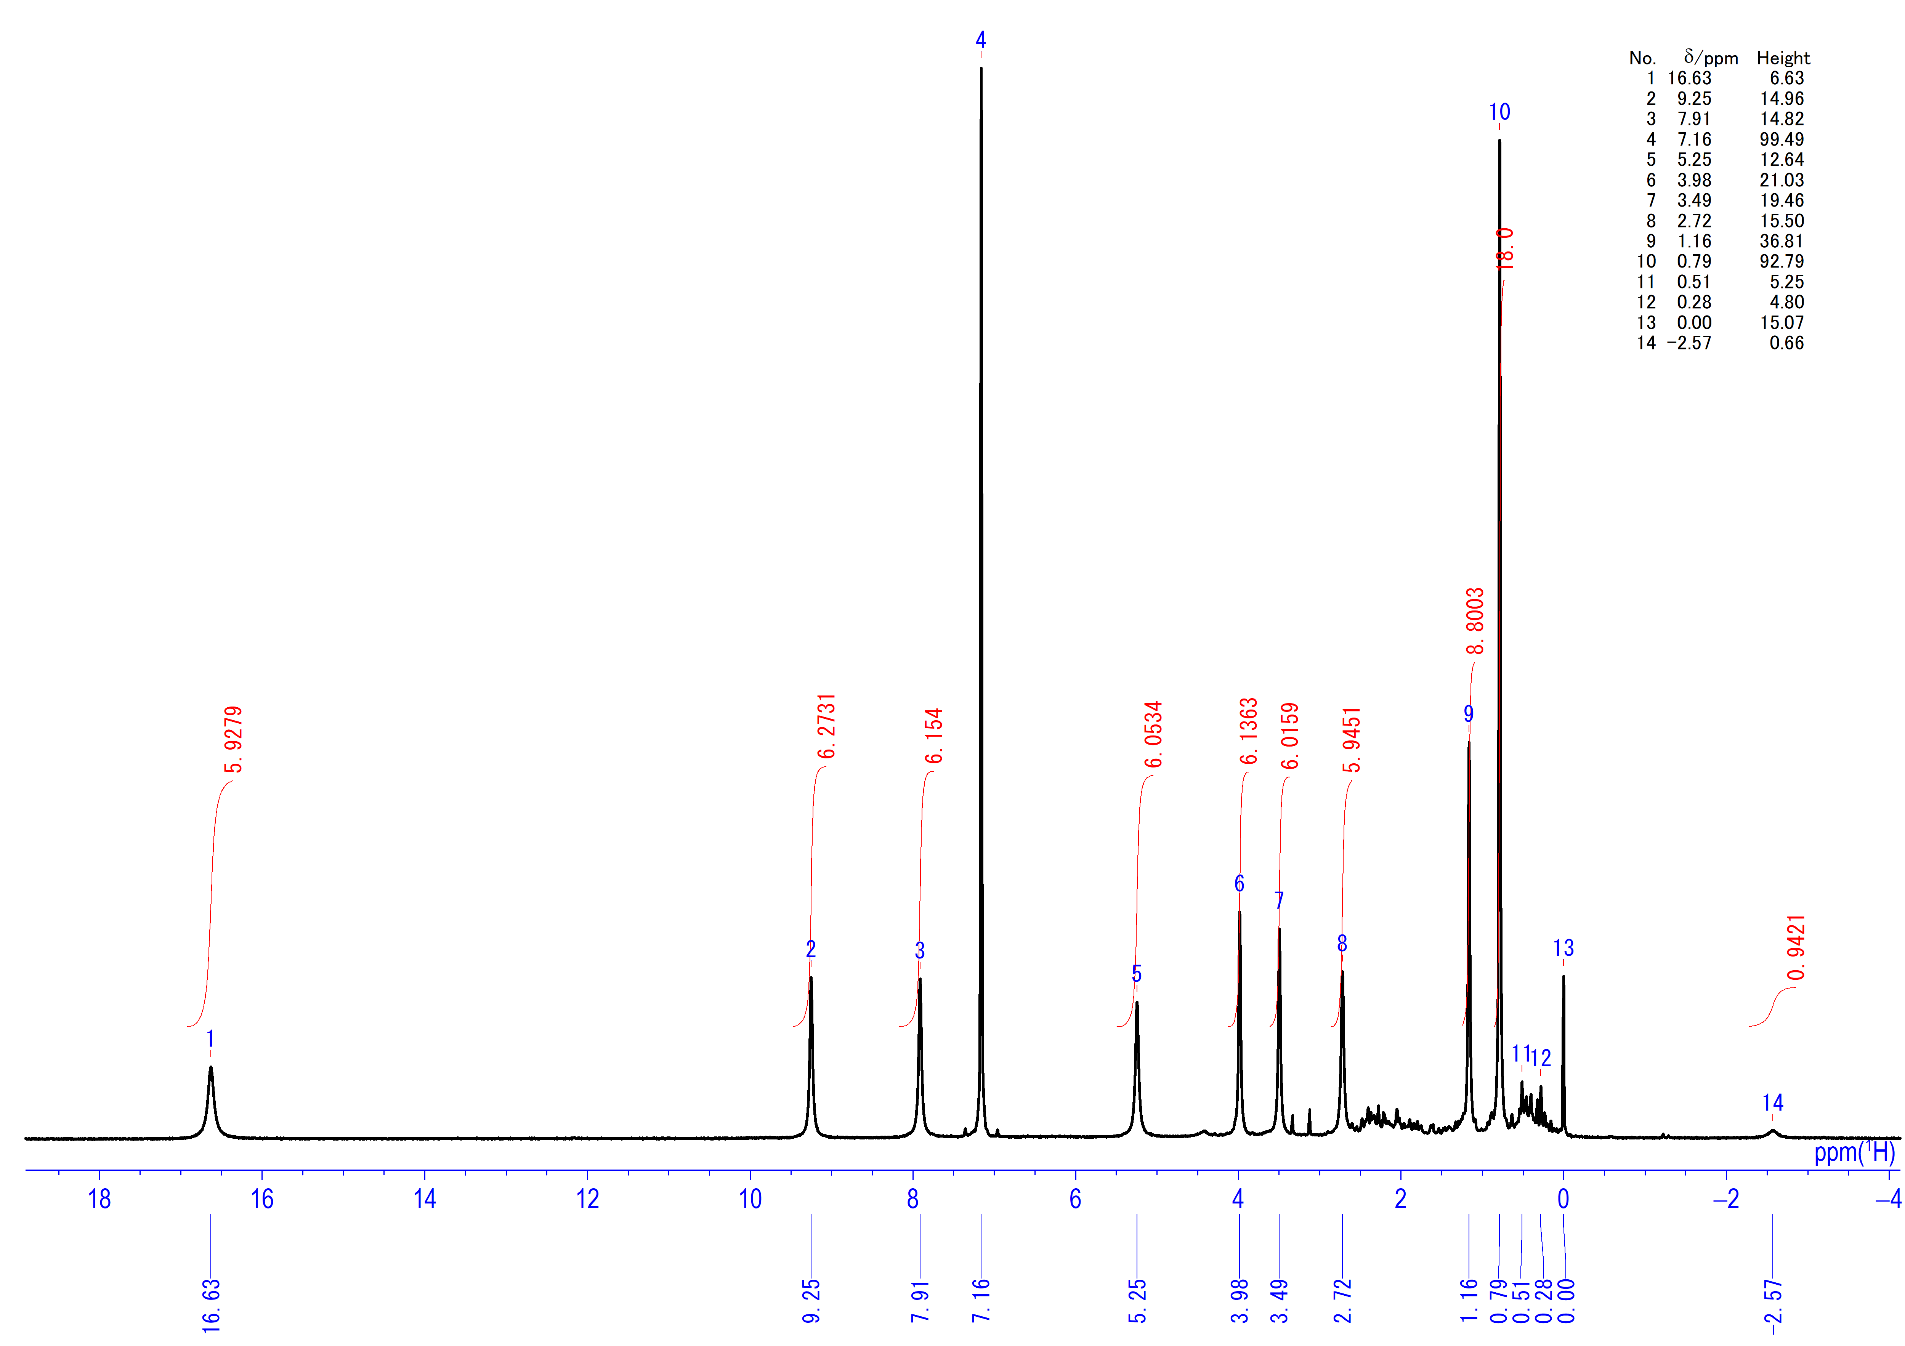


**Figure S40.** 1H NMR spectrum of **8a** (C6D6, rt).

**
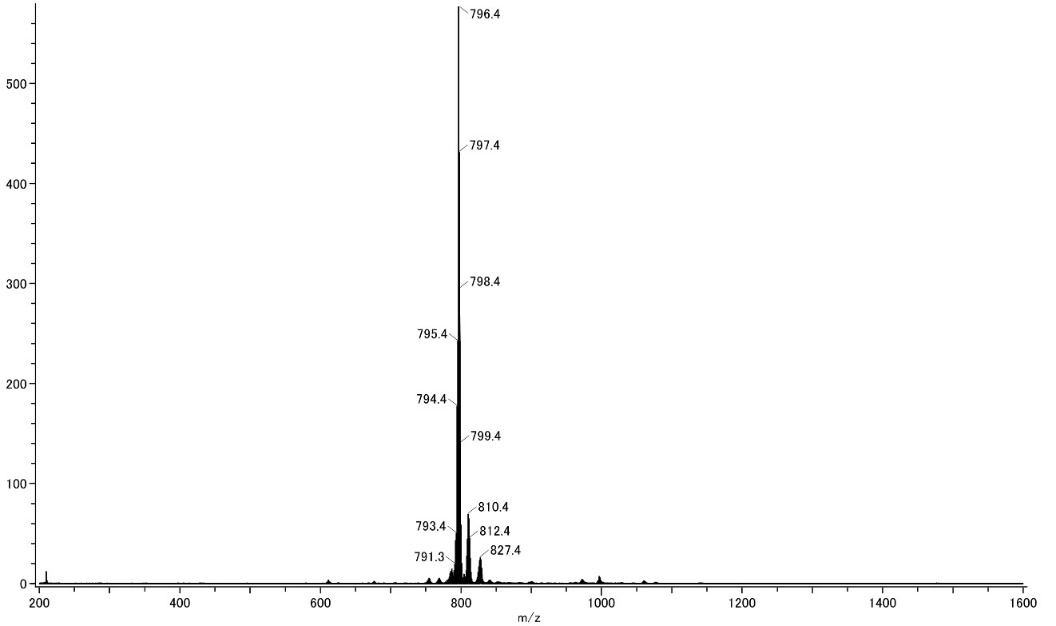
**

**
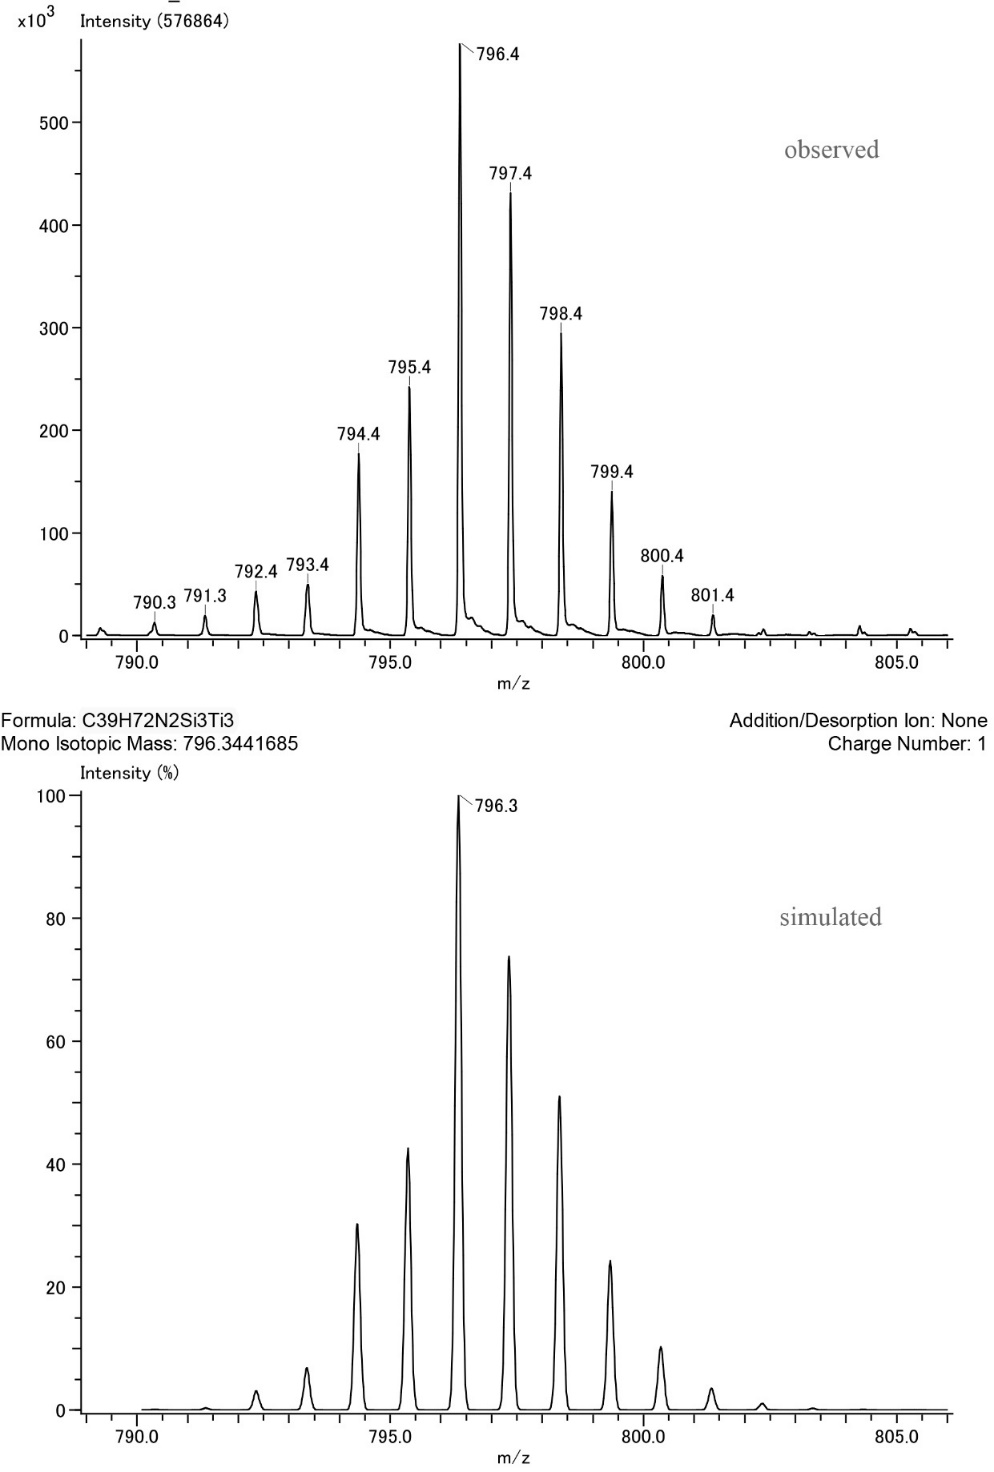
**

**Figure S41.** FD-MS spectra of **8a**.

**Reaction of 5 with D2.** A J. Young valve NMR sample tube was charged with 0.4 mL of C6D6 and complex **5** (4 mg). The solution was degassed and 2 atm of D2 gas was added. The solution was kept at room temperature for 16 h and the 1H NMR monitoring showed the formation of the deuterated complex [{(C5Me4SiMe3)Ti}3(*μ*3-N)(*μ*-NCD(CH3)(CHD2))(*μ*-D)2] (**8a-*d***).

**8a-*d***: 1H NMR (C6D6, rt): *δ* 2.69 (s, 4H, (C*H*3)(C*H*D2)). 2H NMR (C6H6, rt): *δ* 2.7 (brs, CD(CH3)(CH*D*2)), –1.4 (brs, C*D*(CH3)(CHD2)).


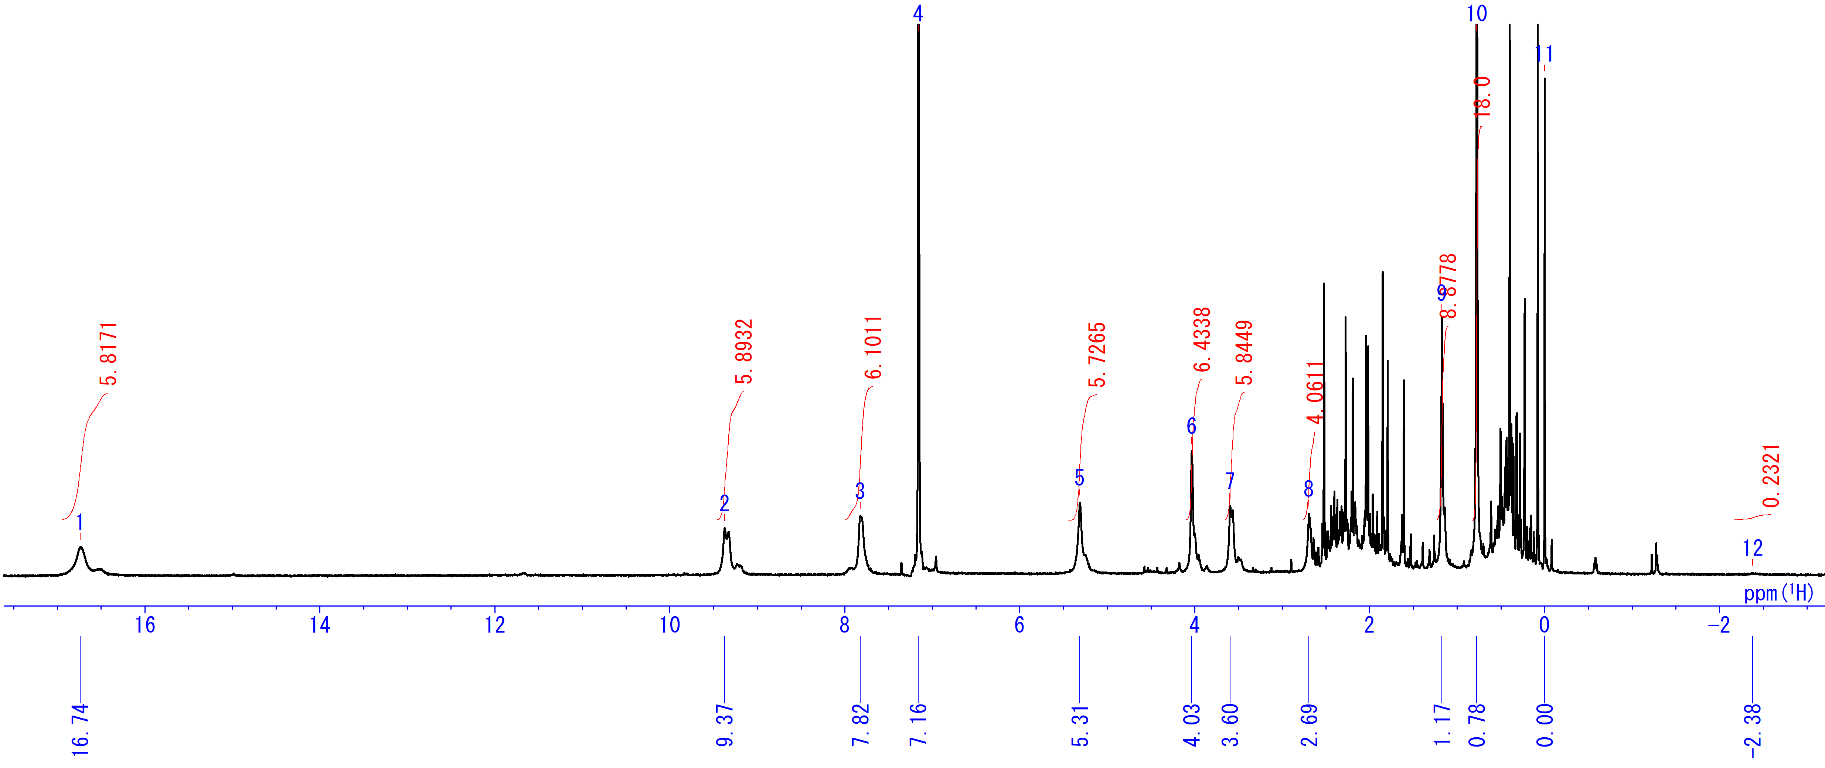


**Figure S42.** 1H NMR spectrum of **8a-*d*** (C6D6, rt).


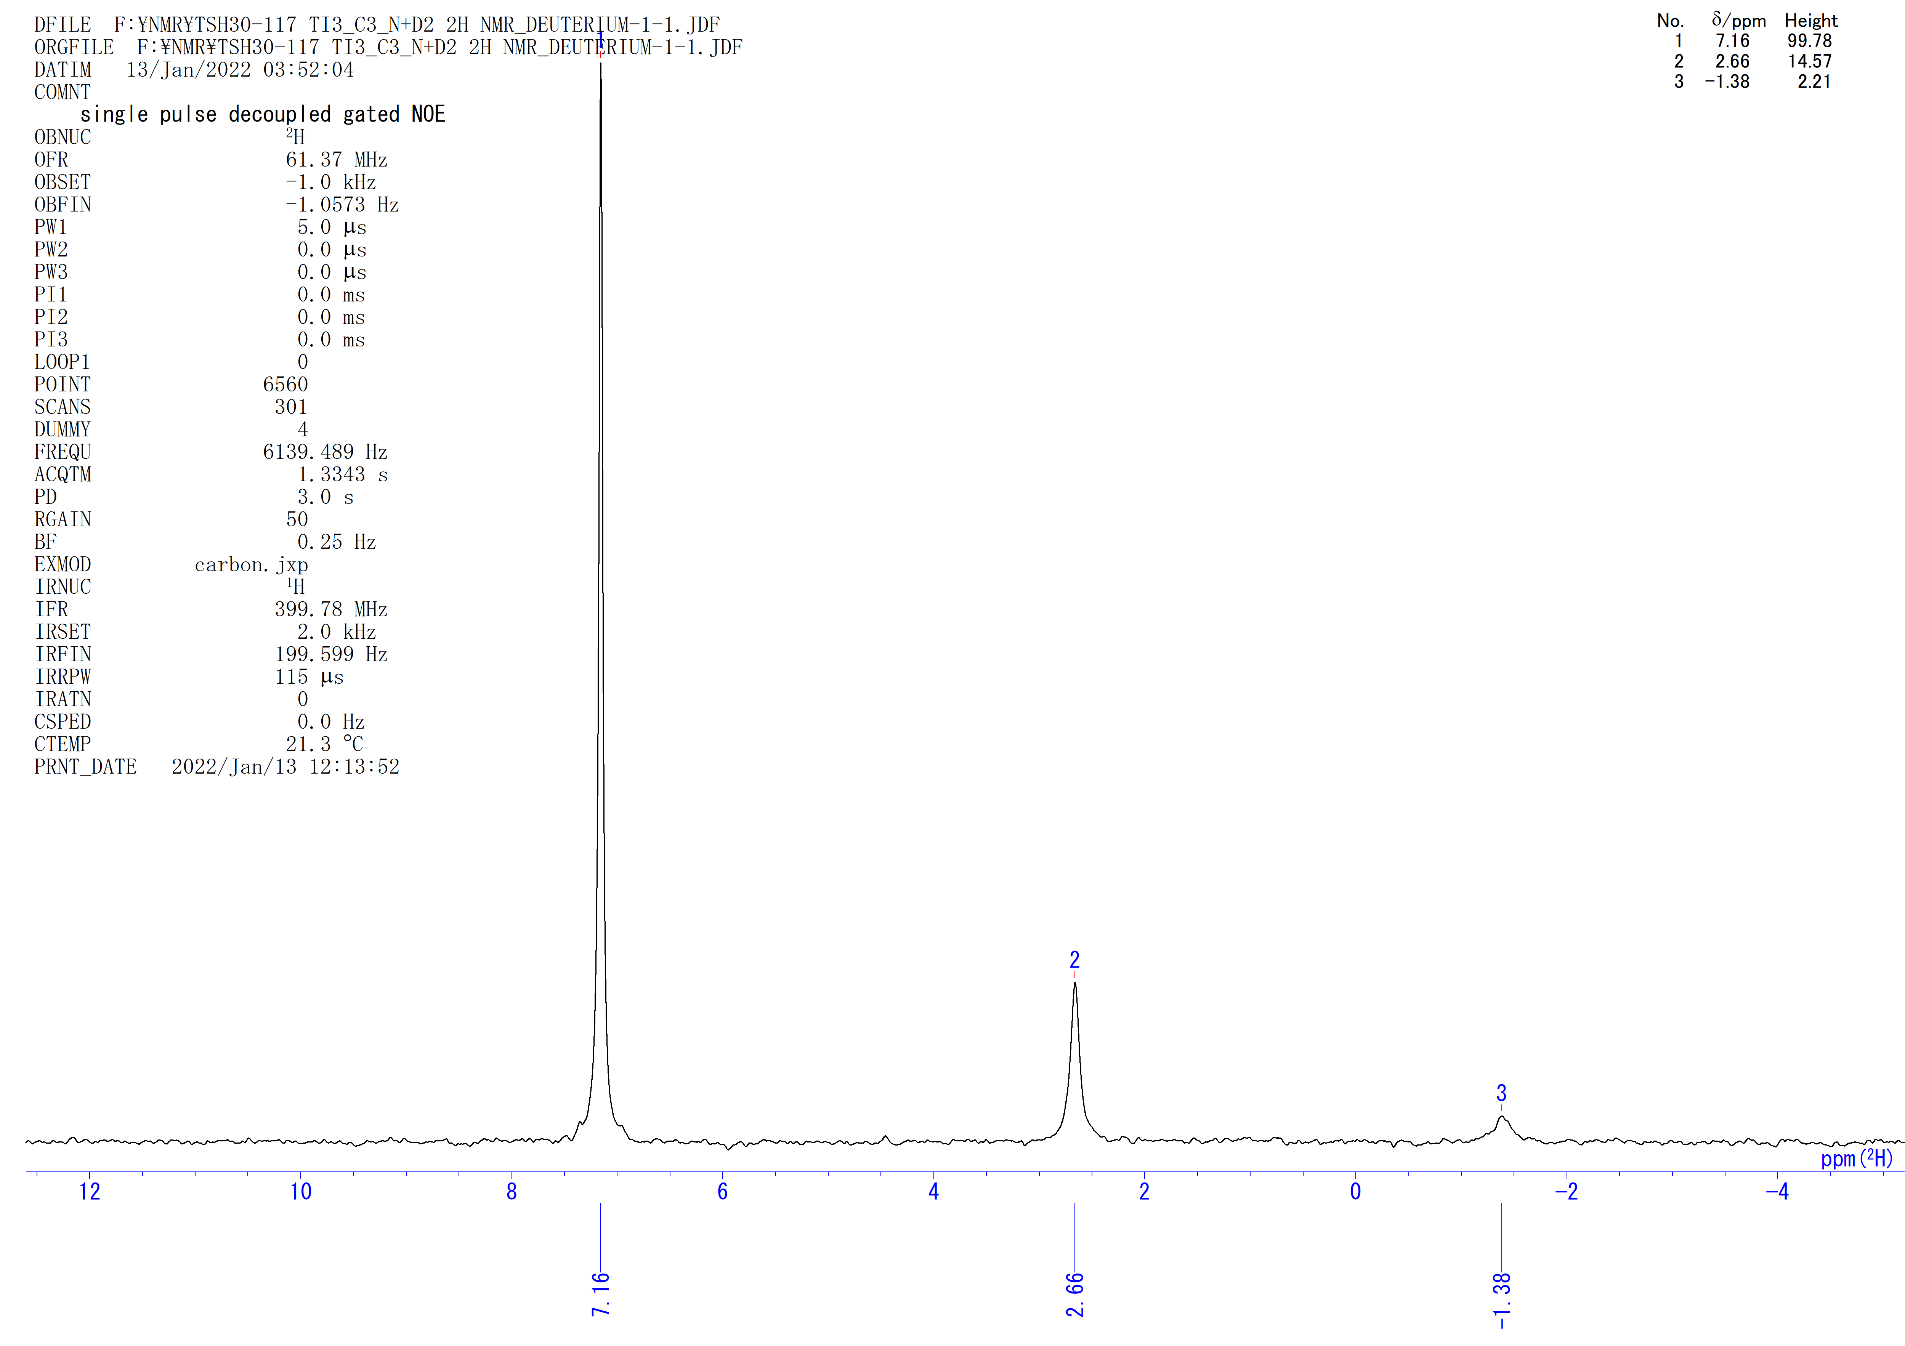


**Figure S43.** 2H NMR spectrum of **8a-*d*** (C6H6, rt).

**[{(C5Me4SiMe3)Ti}3(*μ*3-N)(*μ*-NCH(CH3)2)(*μ*-H)2] (8a) from 4a.** A hexane solution (2.0 mL) of **4a** (51 mg, 0.067 mmol) in 10 mL Hiper Glass Cylinder (TAIATSU TECHNO®) was filled with 5 atm of N2. The solution was stirred at room temperature for 2 days. After the reaction, N2 was released and H2 (4 atm) was filled instead. The solution was kept at room temperature for 1 day with stirring. After the reaction, the solution was evaporated under reduced pressure and the residual dark brown powder was crystallized in hexane/benzene (10/1) at –30 °C to precipitate the crystalline solid **8a** (30 mg, 0.038 mmol). The solution part was evaporated under reduced pressure and the residual dark brown powder was crystallized in DME at –30 °C to precipitate the microcrystalline solid **8a** (13 mg, 0.013 mmol). Overall yield of **8a** is 72%.

**[{(C5Me4SiMe3)Ti}3(*μ*3-N)(*μ*-NCH(CH3)(CH2CH3))(*μ*-H)2] (8b).** A hexane solution (2.0 mL) of **4b** (81 mg, 0.10 mmol) in 10 mL Hiper Glass Cylinder (TAIATSU TECHNO®) was filled with 5 atm of N2. The solution was stirred at room temperature for 2 days. After the reaction, N2 was released and H2 (4 atm) was filled instead. The solution was kept at room temperature for 1 day with stirring. After the reaction, the solution was evaporated and the residual dark brown powder was crystallized in DME (~0.5 mL) at –30 °C to precipitate the crystalline solid [(Cp’Ti)3(*m*3-N)(*m*-NH)(*m*-H)2]. The solution part was concentrated and recrystallized at –30 °C to give the complex **8b** (50 mg, 0.062 mmol, 62%) as a dark green solid.

**8b**: 1H NMR (C6D6, rt): *δ* 16.17 (s, 3H, C5*Me4*SiMe3), 15.82 (s, 3H, C5*Me4*SiMe3), 9.10 (s, 3H, C5*Me4*SiMe3), 8.91 (s, 3H, C5*Me4*SiMe3), 8.30 (s, 3H, C5*Me4*SiMe3), 6.90 (s, 3H, C5*Me4*SiMe3), 5.01 (s, 3H, C5*Me4*SiMe3), 4.88 (s, 3H, C5*Me4*SiMe3), 3.92 (s, 1H, -CHC*H2*CH3), 3.69 (s, 3H, C5*Me4*SiMe3), 3.66 (s, 3H, C5*Me4*SiMe3), 3.61 (s, 3H, C5*Me4*SiMe3), 3.07 (s, 3H, C5*Me4*SiMe3), 2.75 (s, 3H, -CHCH2C*H3*), 1.34 (s, 3H, -CH*Me*), 0.94 (s, 9H, C5Me4Si*Me3*), 0.73 (s, 9H, C5Me4Si*Me3*), 0.66 (s, 9H, C5Me4Si*Me3*), –1.29 (s, 1H, -C*H*Me). Anal. calcd. for C40H74N2Si3Ti3: C, 59.25; H, 9.20; N, 3.45. Found: C, 59.23; H, 8.99; N, 3.55.


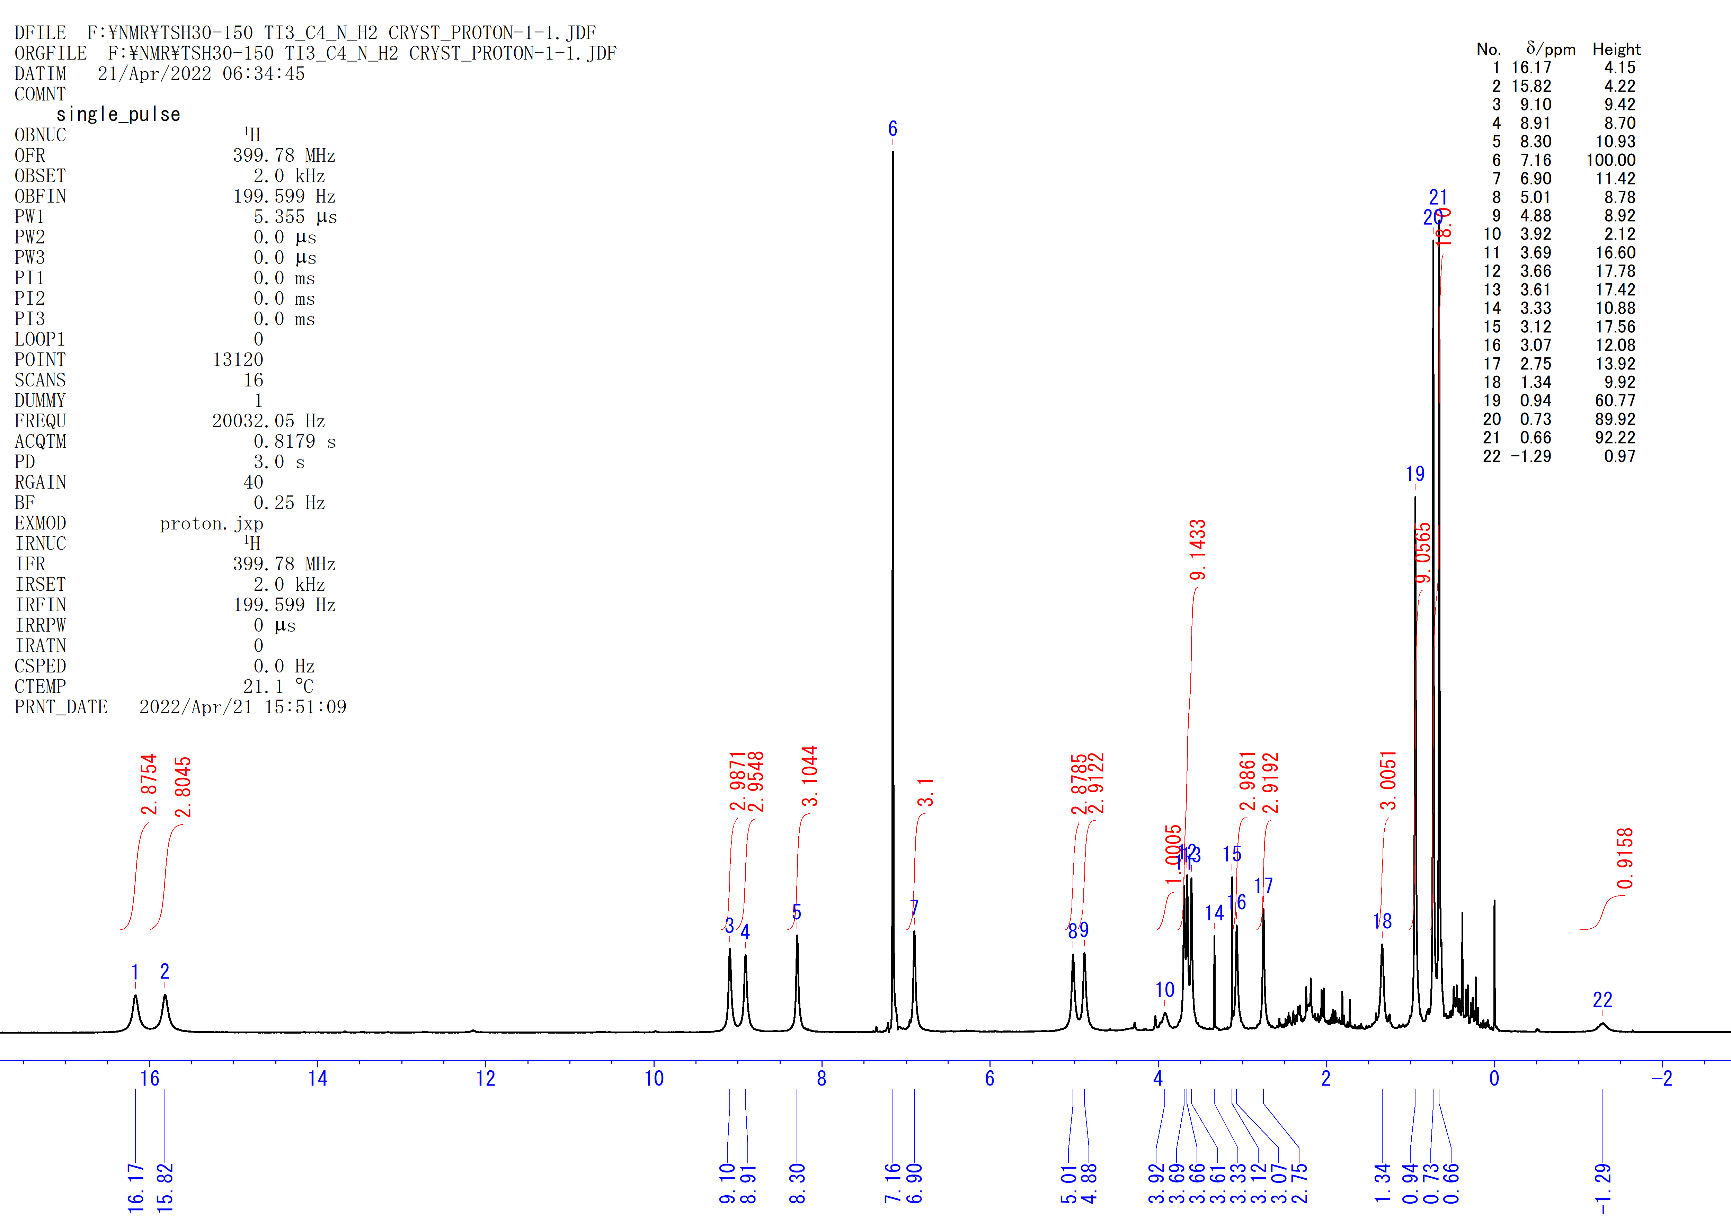


**Figure S44.** 1H NMR spectrum of **8b** (C6D6, rt).

**[{(C5Me4SiMe3)Ti}3(*μ*3-N)(*μ*-NCH(CH3)(CH2CH2CH3))(*μ*-H)2] (8c).** A hexane solution (2.0 mL) of **4c** (62 mg, 0.078 mmol) in 10 mL Hiper Glass Cylinder (TAIATSU TECHNO®) was filled with 5 atm of N2. The solution was stirred at room temperature for 2 days. After the reaction, N2 was released and H2 (4 atm) was filled instead. The solution was kept at room temperature for 1 day with stirring. After the reaction, the solution was evaporated and the residual dark brown powder was crystallized in DME (~0.3 mL) at –30 °C to precipitate the crystalline solid [(Cp’Ti)3(*m*3-N)(*m*-NH)(*m*-H)2]. The solution part was evaporated under reduced pressure to give the complex **8c** (54 mg, 0.065 mmol, 83%) as a dark green solid (no crystals were obtained).

**8c**: 1H NMR (C6D6, rt): *δ* 16.41 (s, 3H, C5*Me4*SiMe3), 15.74 (s, 3H, C5*Me4*SiMe3), 9.14 (s, 3H, C5*Me4*SiMe3), 9.10 (s, 3H, C5*Me4*SiMe3), 8.34 (s, 3H, C5*Me4*SiMe3), 6.81 (s, 3H, C5*Me4*SiMe3), 5.11 (s, 3H, C5*Me4*SiMe3), 4.73 (s, 3H, C5*Me4*SiMe3), 3.79 (s, 3H, C5*Me4*SiMe3), 3.60 (s, 6H, C5*Me4*SiMe3), 3.16 (s, 3H, C5*Me4*SiMe3), 2.62 (s, 3H, C5*Me4*SiMe3), 1.13 (s, 3H, C5*Me4*SiMe3), 0.92 (s, 9H, C5Me4Si*Me3*), 0.71 (s, 9H, C5Me4Si*Me3*), 0.64 (s, 9H, C5Me4Si*Me3*), –0.69 (s, 1H, -C*H*Me). Anal. calcd. for C41H76N2Si3Ti3: C, 59.70; H, 9.29; N, 3.40. Found: C, 59.13; H, 8.98; N, 3.71.


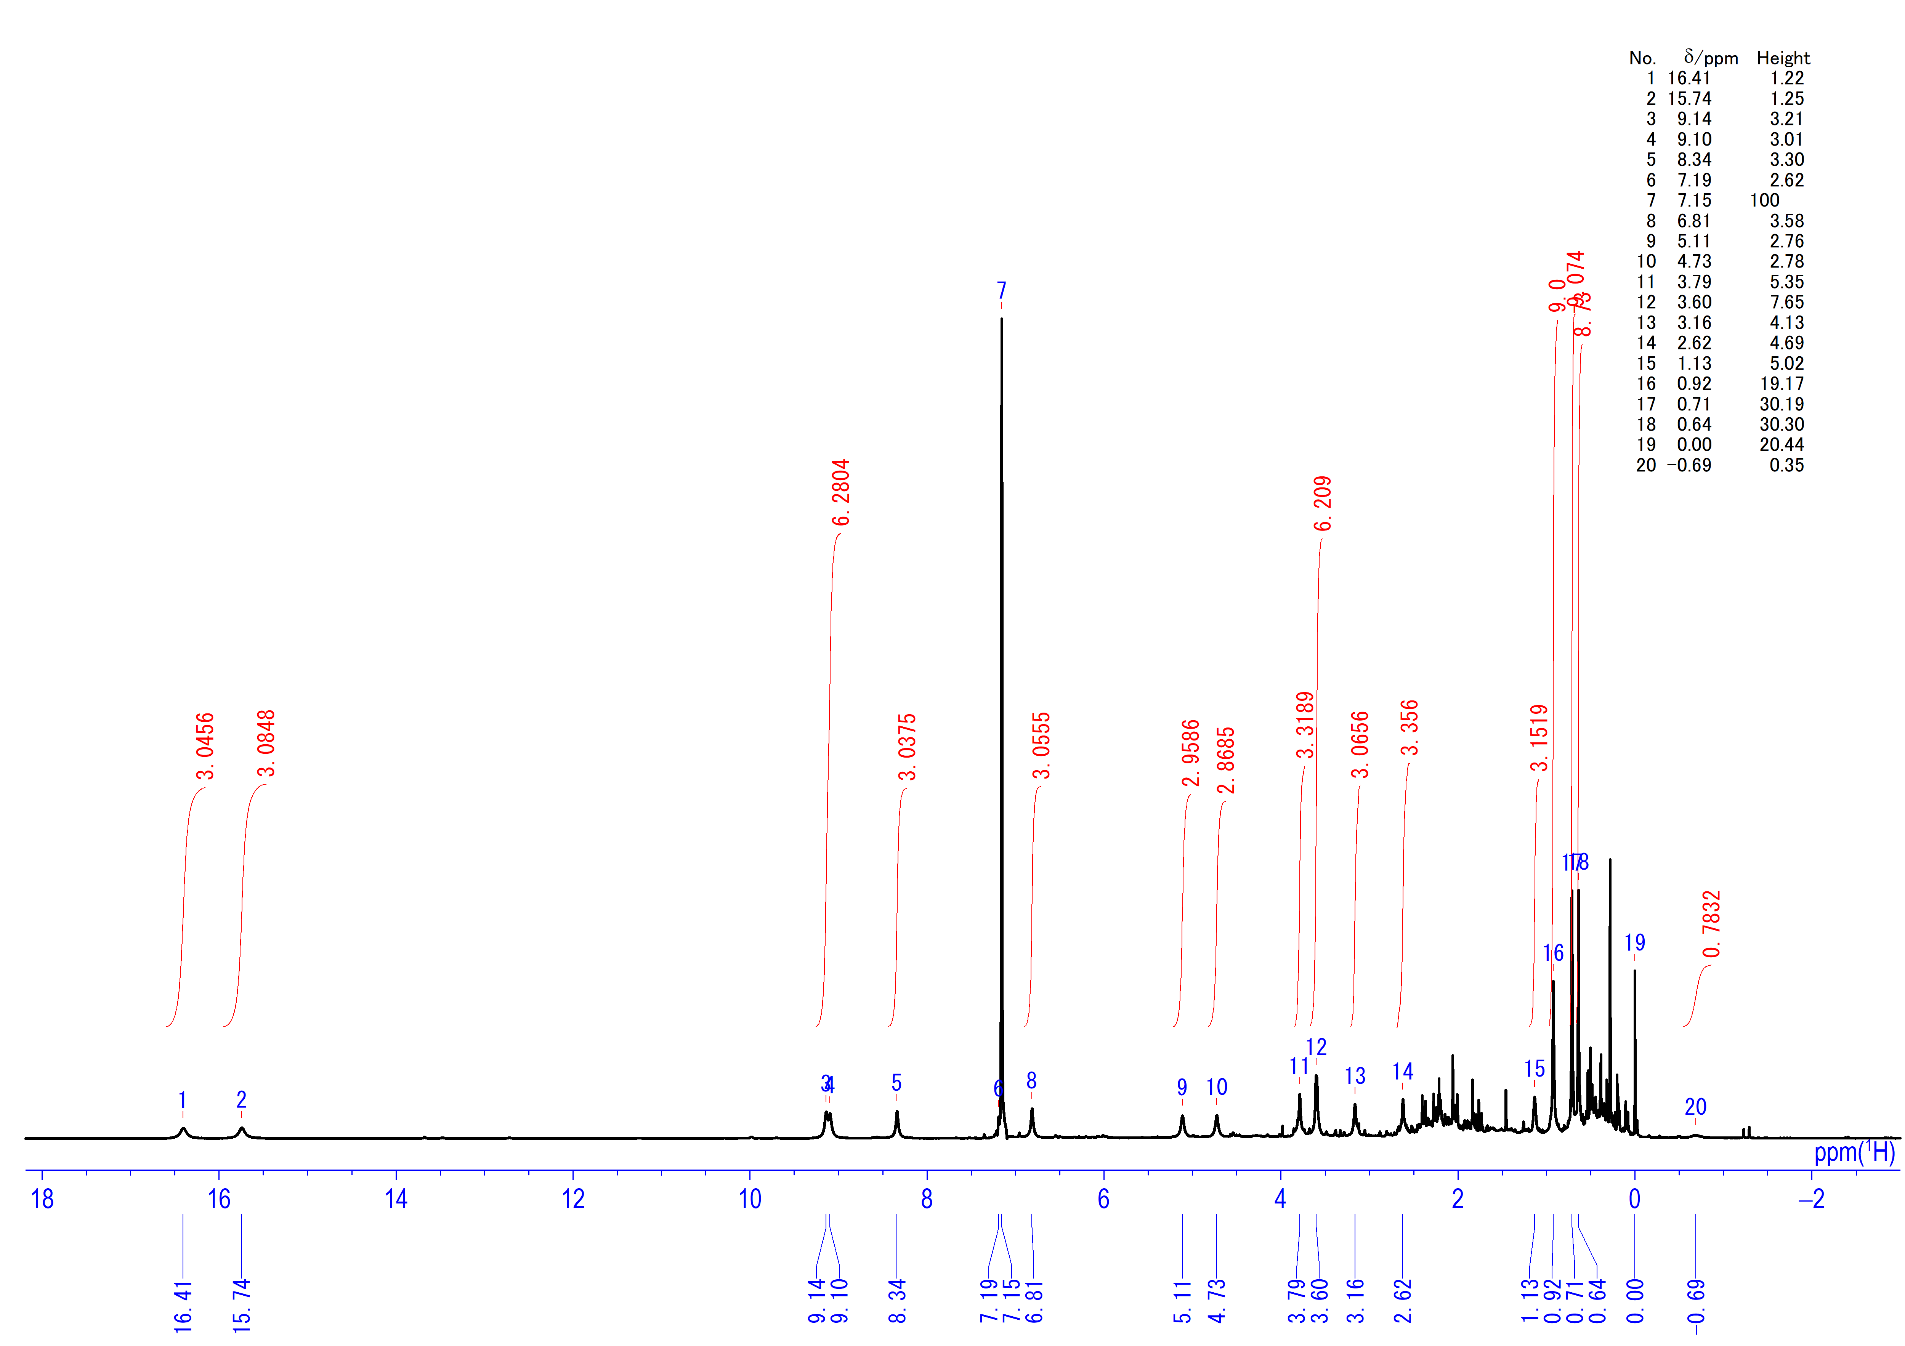


**Figure S45.** 1H NMR spectrum of **8c** (C6D6, rt).

**[{(C5Me4SiMe3)Ti}3(*μ*3-N)(*μ*-NCH(CH3)(CH2CH2CH2CH3))(*μ*-H)2] (8d).** A hexane solution (2.0 mL) of **4d** (40 mg, 0.049 mmol) in 10 mL Hiper Glass Cylinder (TAIATSU TECHNO®) was filled with 5 atm of N2. The solution was stirred at room temperature for 2 days. After the reaction, N2 was released and H2 (4 atm) was filled instead. The solution was kept at room temperature for 1 day with stirring. After the reaction, the solution was evaporated and the residual dark brown powder was crystallized in DME at –30 °C to precipitate the crystalline solid [(Cp’Ti)3(*m*3-N)(*m*-NH)(*m*-H)2]. The solution part was evaporated under reduced pressure to give the complex **8d** (34 mg, 0.041 mmol, 84%) as a dark green solid (no crystals were obtained).

**8d**: 1H NMR (C6D6, rt): *δ* 16.22 (s, 3H, C5*Me4*SiMe3), 15.79 (s, 3H, C5*Me4*SiMe3), 9.13 (s, 3H, C5*Me4*SiMe3), 8.89 (s, 3H, C5*Me4*SiMe3), 8.39 (s, 3H, C5*Me4*SiMe3), 6.88 (s, 3H, C5*Me4*SiMe3), 5.06 (s, 3H, C5*Me4*SiMe3), 4.87 (s, 3H, C5*Me4*SiMe3), 3.74 (s, 3H, C5*Me4*SiMe3), 3.62 (s, 6H, C5*Me4*SiMe3), 3.07 (s, 3H, C5*Me4*SiMe3), 2.74 (s, 3H, C5*Me4*SiMe3), 0.97 (s, 9H, C5Me4Si*Me3*), 0.89 (s, 3H, -CH*Me*), 0.74 (s, 9H, C5Me4Si*Me3*), 0.66 (s, 9H, C5Me4Si*Me3*), –0.69 (s, 1H, -C*H*Me). Anal. calcd. for C42H78N2Si3Ti3: C, 60.13; H, 9.37; N, 3.34. Found: C, 59.92; H, 8.89; N, 3.67.


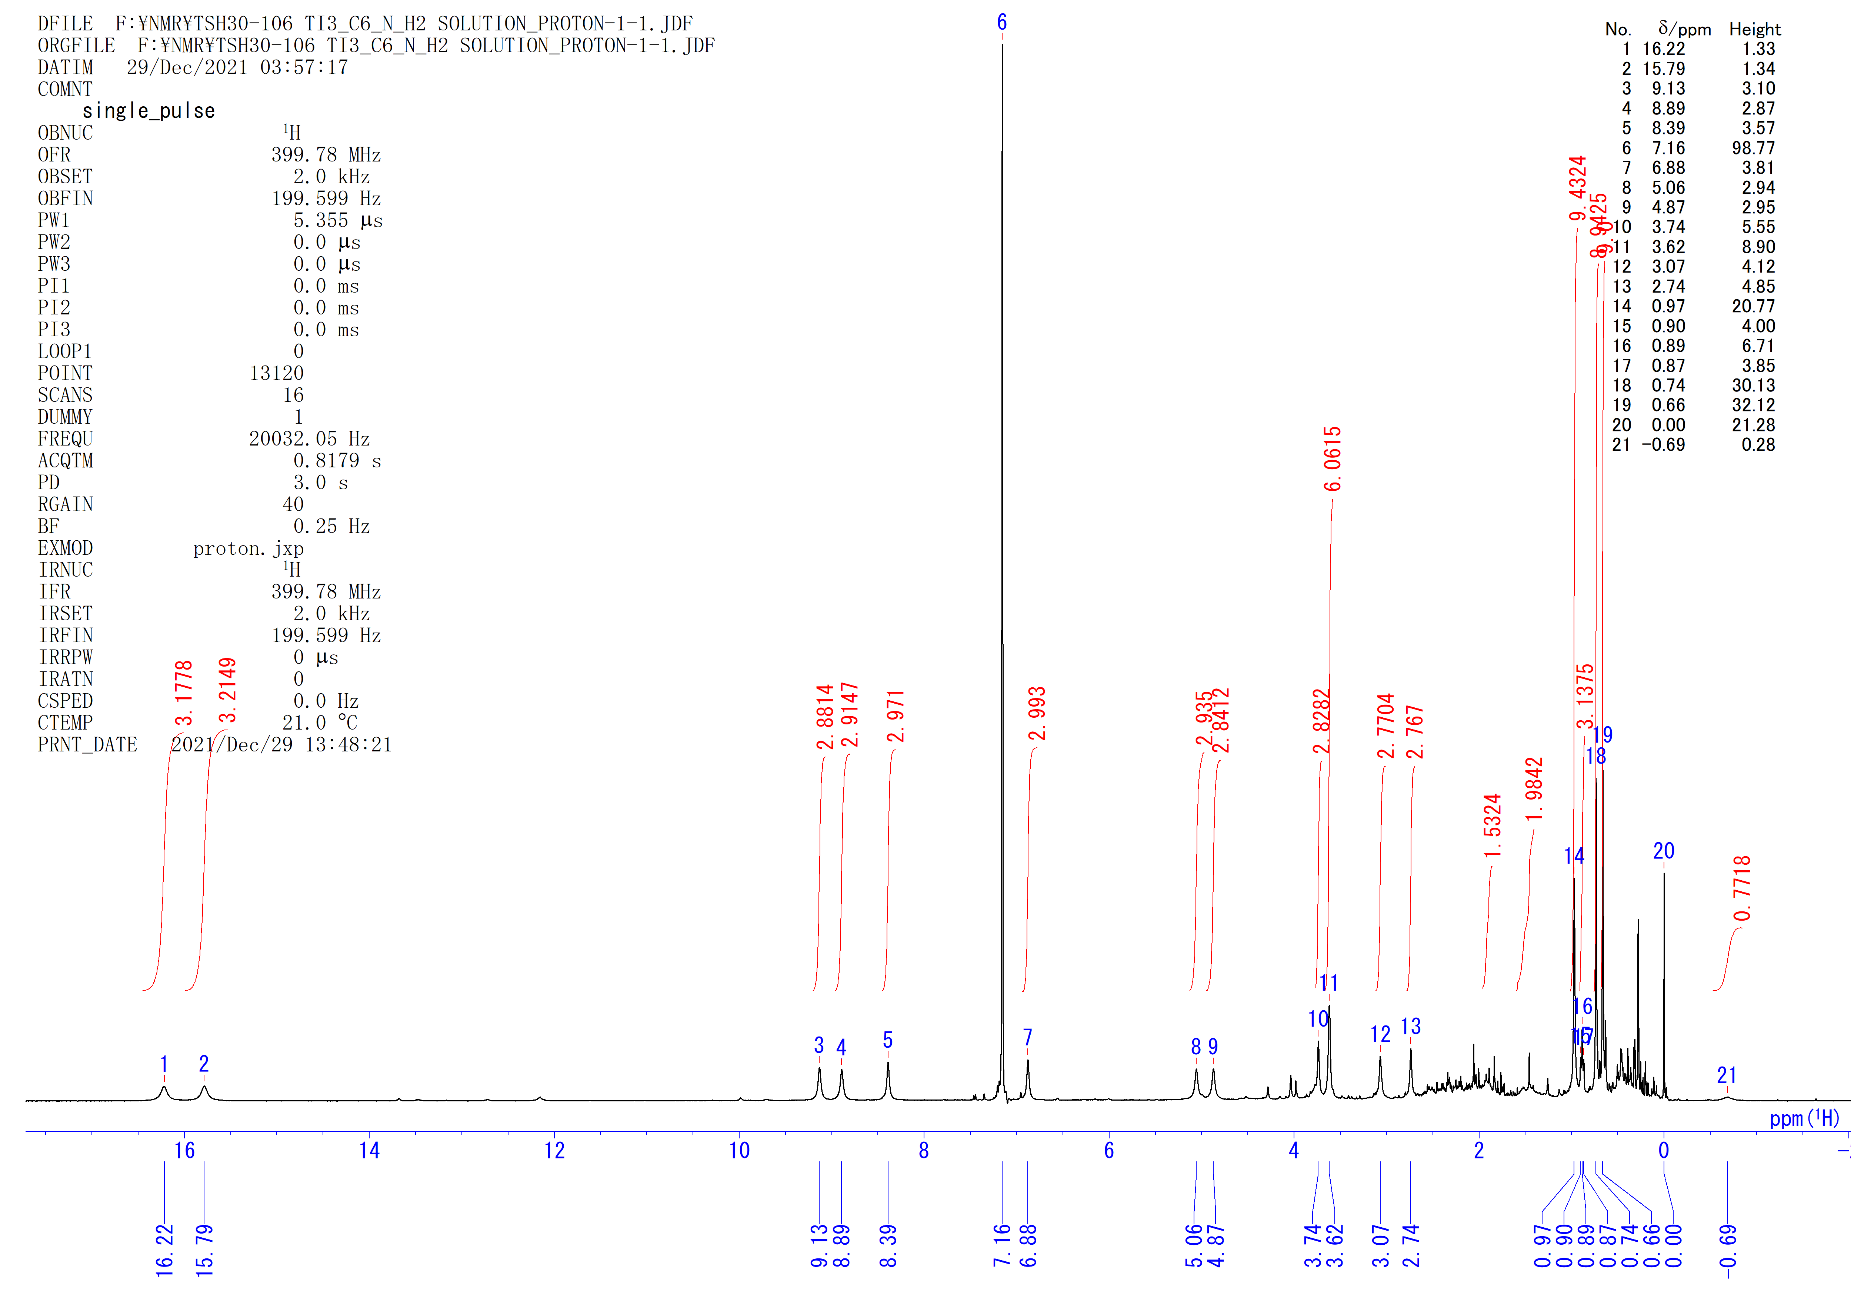


**Figure S46.** 1H NMR spectrum of **8d** (C6D6, rt).

**[{(C5Me4SiMe3)Ti}3(*μ*3-N)(*μ*-NCH(CH3)Ph)(*μ*-H)2] (8e).** A hexane solution (2.0 mL) of **4e** (60 mg, 0.072 mmol) in 10 mL Hiper Glass Cylinder (TAIATSU TECHNO®) was filled with 5 atm of N2. The solution was stirred at 40 °C for 2 days. After the reaction, N2 was released and H2 (4 atm) was filled instead. The solution was kept at room temperature for 1 day with stirring. After the reaction, the solution was evaporated and the residual dark brown powder was crystallized in hexane at –30 °C to precipitate the crystalline solid [(Cp’Ti)3(*m*3-N)(*m*-NH)(*m*-H)2]. The solution part was evaporated under reduced pressure to give the complex **8e** (45 mg, 0.052 mmol, 72%) as a dark brown solid (no crystals were obtained).

**8e**: 1H NMR (C6D6, rt): *δ* 14.51 (s, 3H, C5*Me4*SiMe3), 13.00 (s, 3H, C5*Me4*SiMe3), 10.61 (s, 3H, C5*Me4*SiMe3), 7.61 (s, 3H, C5*Me4*SiMe3), 7.54 (t, *J*HH =7.2 Hz, 1H, Ph), 6.85 (s, 2H, Ph), 6.65 (s, 3H, C5*Me4*SiMe3), 6.24 (s, 2H, Ph), 5.55 (s, 3H, C5*Me4*SiMe3), 4.38 (s, 6H, C5*Me4*SiMe3), 3.85 (s, 3H, C5*Me4*SiMe3), 3.37 (s, 3H, C5*Me4*SiMe3), 3.30 (s, 3H, C5*Me4*SiMe3), 3.16 (s, 3H, C5*Me4*SiMe3), 0.75 (s, 9H, C5Me4Si*Me3*), 0.60 (s, 9H, C5Me4Si*Me3*), 0.41 (s, 9H, C5Me4Si*Me3*). Anal. calcd. for C44H74N2Si3Ti3: C, 61.53; H, 8.68; N, 3.26. Found: C, 61.25; H, 8.56; N, 3.57.


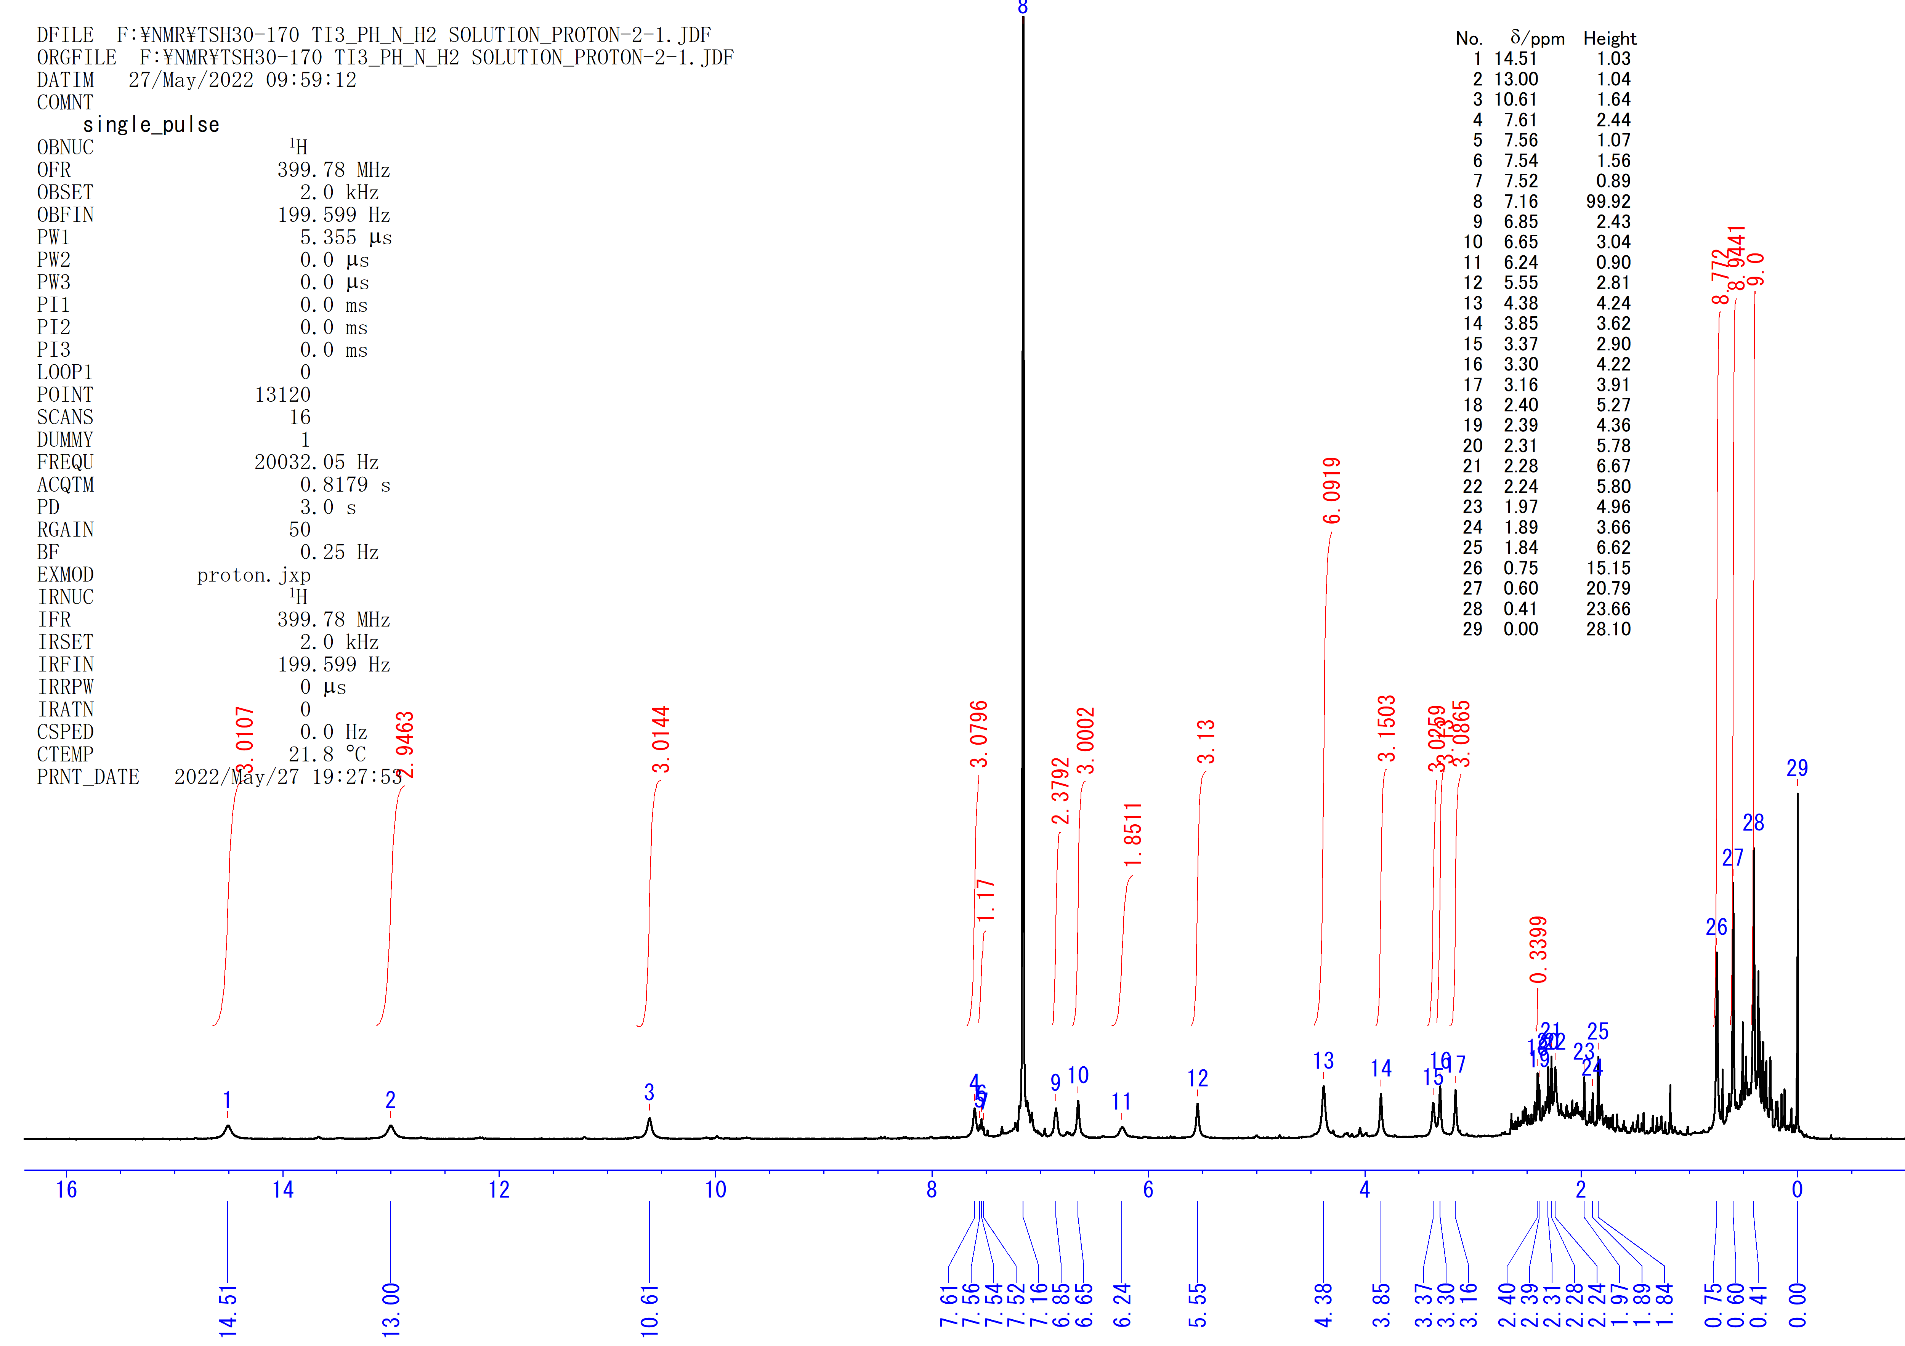


**Figure S47.** 1H NMR spectrum of **8e** (C6D6, rt).

**[{(C5Me4SiMe3)Ti}3(*μ*3-N)(*μ*-NCH(CH3)C5H9)(*μ*-H)2] (8f).** A hexane solution (2.0 mL) of **4f** (63 mg, 0.077 mmol) in 10 mL Hiper Glass Cylinder (TAIATSU TECHNO®) was filled with 5 atm of N2. The solution was stirred at room temperature for 1 day. After the reaction, N2 was released and H2 (10 atm) was filled at –20 °C. The solution was kept at –20 °C for 19 h with stirring. After the reaction, the solution was evaporated and the residual dark brown powder was crystallized in hexane at –30 °C to precipitate the crystalline solid [(Cp’Ti)3(*m*3-N)(*m*-NH)(*m*-H)2]. The solution part was evaporated under reduced pressure to give the complex **8f** (55 mg, 0.065 mmol, 84%) as a dark brown solid (no crystals were obtained).

**8f**: 1H NMR (C6D6, rt): *δ* 15.42 (s, 3H, C5*Me4*SiMe3), 14.25 (s, 3H, C5*Me4*SiMe3), 9.45 (s, 3H, C5*Me4*SiMe3), 8.31 (s, 3H, C5*Me4*SiMe3), 6.96 (s, 3H, C5*Me4*SiMe3), 5.87 (s, 3H, C5*Me4*SiMe3), 4.77 (s, 3H, C5*Me4*SiMe3), 4.00 (s, 3H, C5*Me4*SiMe3), 3.88 (s, 3H, C5*Me4*SiMe3), 3.30 (s, 6H, C5*Me4*SiMe3), 2.88 (s, 3H, C5*Me4*SiMe3), 1.96 (m, 7H, C5*Me4*SiMe3+-C*H*3), 1.53 (m, 2H, -C5*H*9), 0.97 (m, 2H, -C5*H*9), 0.61 (s, 9H, C5Me4Si*Me3*), 0.59 (s, 9H, C5Me4Si*Me3*), 0.52 (s, 9H, C5Me4Si*Me3*). Anal. calcd. for C43H78N2Si3Ti3: C, 60.69; H, 9.24; N, 3.29. Found: C, 59.88; H, 8.91; N, 2.86.

**
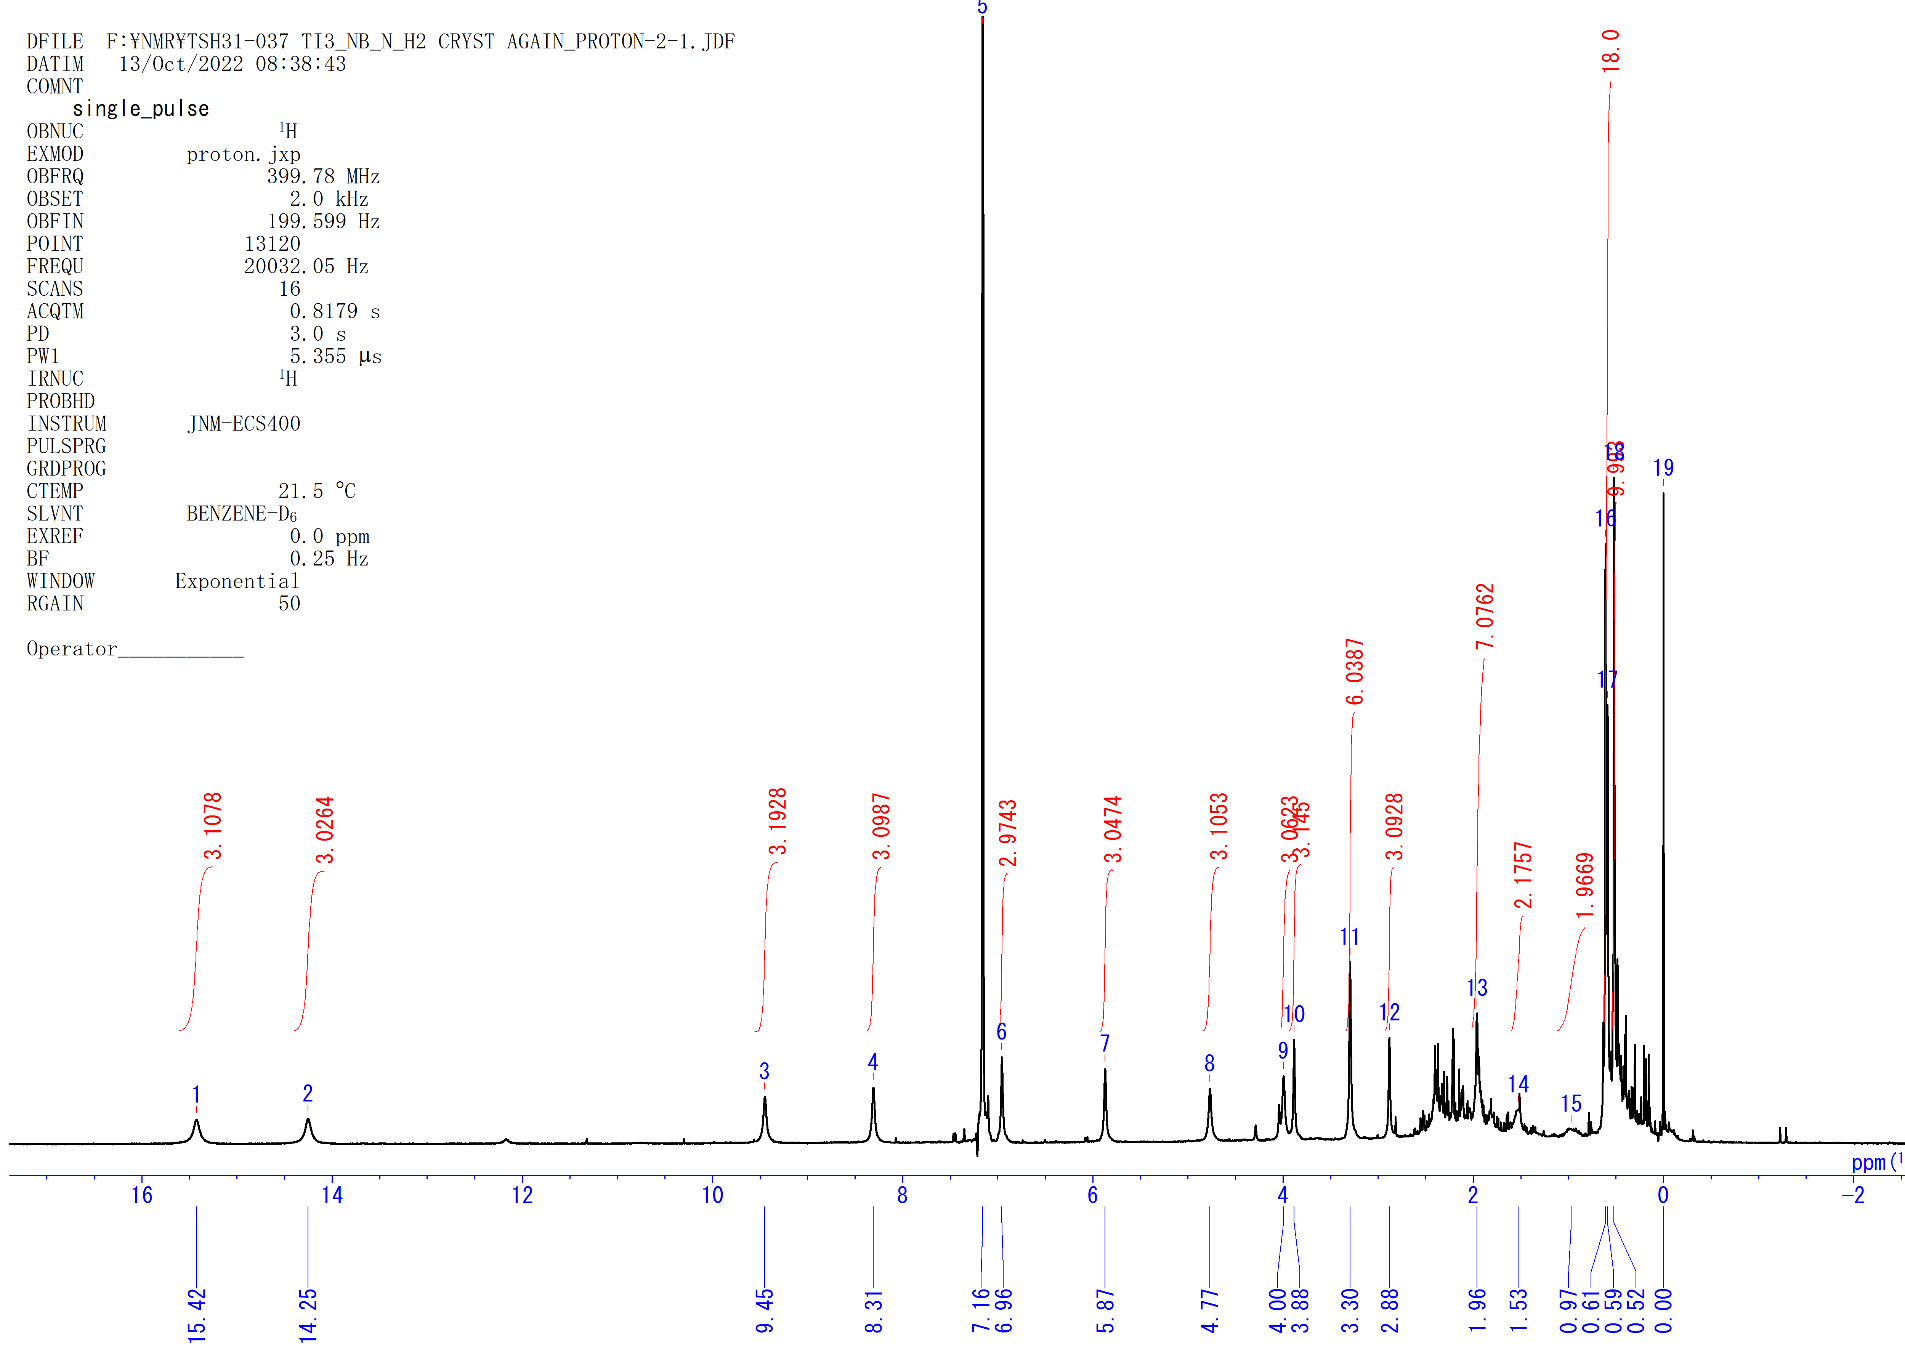
**

**Figure S48.** 1H NMR spectrum of **8f** (C6D6, rt).

**[{(C5Me4SiMe3)Ti}3(*μ*3-N)(*μ*-NC6H11)(*μ*-H)2] (8g).** A C6D6 solution (0.5 mL) of **4g** (38 mg, 0.047 mmol) in J-Young NMR tube was filled with 1 atm of N2. The solution was stirred at 40 °C for 2 days. After the reaction, N2 was removed and H2 (1 atm) was filled instead. The solution was kept at 40 °C for 1 day. After the reaction, the 1H NMR showed that the complex **8g** was quantitatively formed. The solution part was evaporated under reduced pressure to give the complex **8g** (40 mg, 0.047 mmol, 100%) as a dark brown solid. Many trials for crystallization of **8g** were failed. Alternatively, the analogous C5Me4SiMe2*t*Bu-ligated complex [{(C5Me4SiMe2*t*Bu)Ti}3(*m*3-N)(*m*-NC6H11)(*m*-H)2] (**8g’**) obtained from the reaction of [{(C5Me4SiMe2*t*Bu)Ti}3(*μ*3-*η*2,*η*3,*η*1-C6H7)(*μ*-H)3(*μ*3-H)] (**4g’**) with N2, followed by H2 provided crystals suitable for an X-ray diffraction study (toluene, –30 °C).

**8g**: 1H NMR (C6D6, rt): *δ* 17.03 (s, 6H, C5*Me4*SiMe3), 9.19 (s, 6H, C5*Me4*SiMe3), 8.13 (s, 6H, C5*Me4*SiMe3), 5.48 (s, 6H, C5*Me4*SiMe3), 4.04 (s, 6H+2H, C5*Me4*SiMe3+-C6*H*11), 3.44 (s, 6H+2H, C5*Me4*SiMe3+-C6*H*11), 2.80 (brs, 2H, -C6*H*11), 1.19 (s, 9H, C5Me4Si*Me3*), 0.82 (s, 18H, C5Me4Si*Me3*), –1.05 (brs, 1H, -C6*H*11). Anal. calcd. for C42H76N2Si3Ti3: C, 60.27; H, 9.15; N, 3.35. Found: C, 60.58; H, 9.29; N, 2.81.


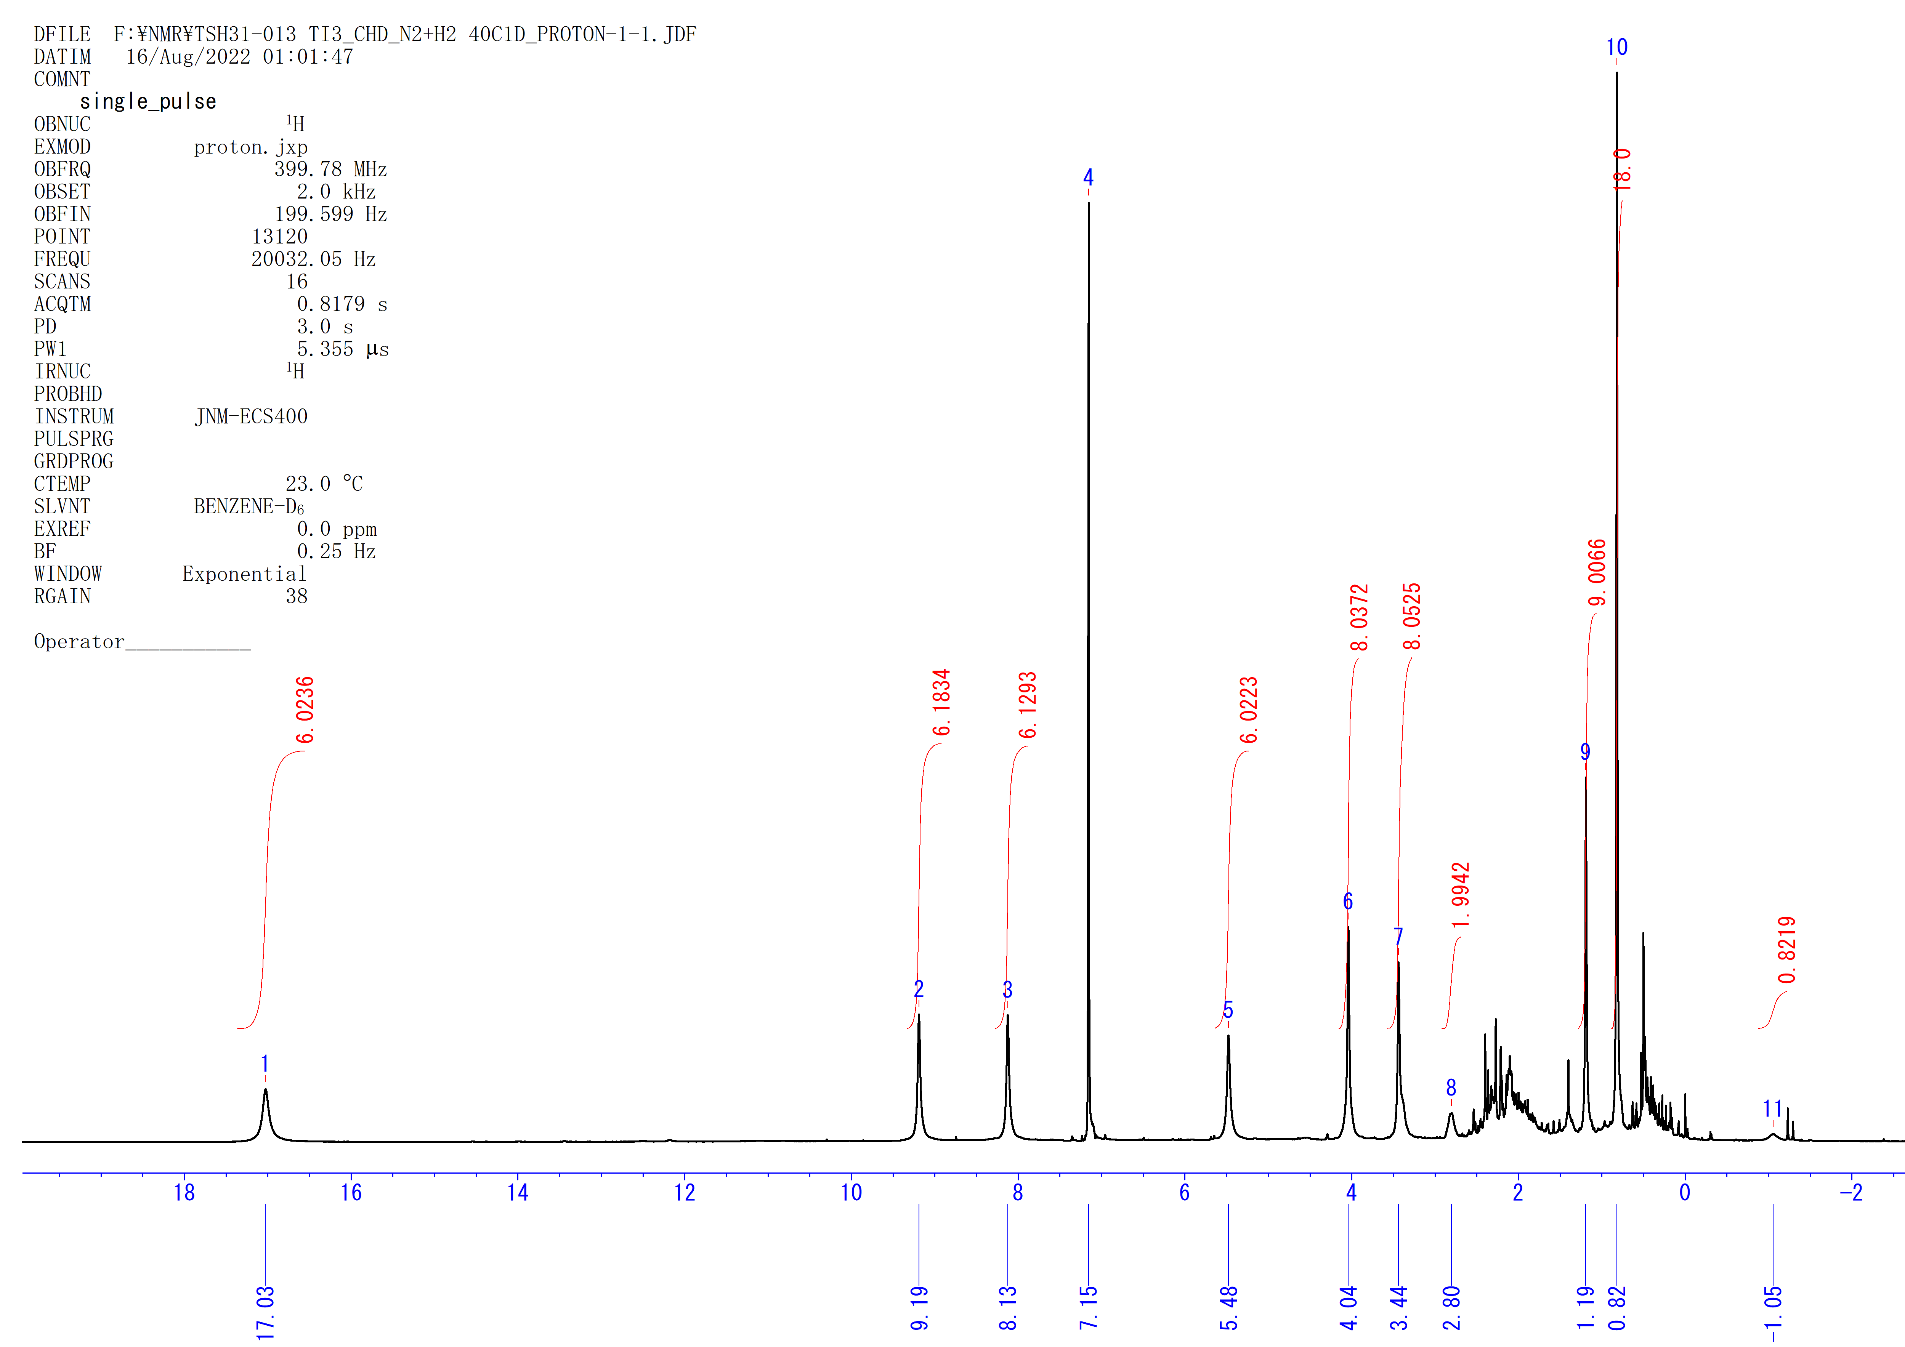


**Figure S49.** 1H NMR spectrum of **8g** (C6D6, rt).

**Hydrolysis of 3 with H2O**

Degassed H2O (5.0 M in THF, 100 µl, 0.50 mmol) was added to a 3 ml toluene solution of complex **3** (22 mg, 0.028 mmol) under vigorously stirring at −78 oC. After 1 h, the resulting dark-red suspension was separated by a “trap-to-trap” technique. The solid residue was treated with an excess amount of ether solution of HCl (1.0 M, 300 µl). The resulting orange–red solution was evaporated to give (C5Me4SiMe3)TiCl3 (28 mg, 0.081 mmol, 96%). The volatile part obtained in the above “trap-to-trap” separation was treated with HCl (1.0 M in ether, 0.3 ml), which led to immediate formation of NH4Cl (2.5 mg, 0.047 mmol, 168%) as white solid. Hydrolysis of C6D6 solution of **3** with H2O in a J. Young valve NMR tube showed the formation of propylene (37% NMR yield) and propane (9% NMR yield) as hydrocarbon units.


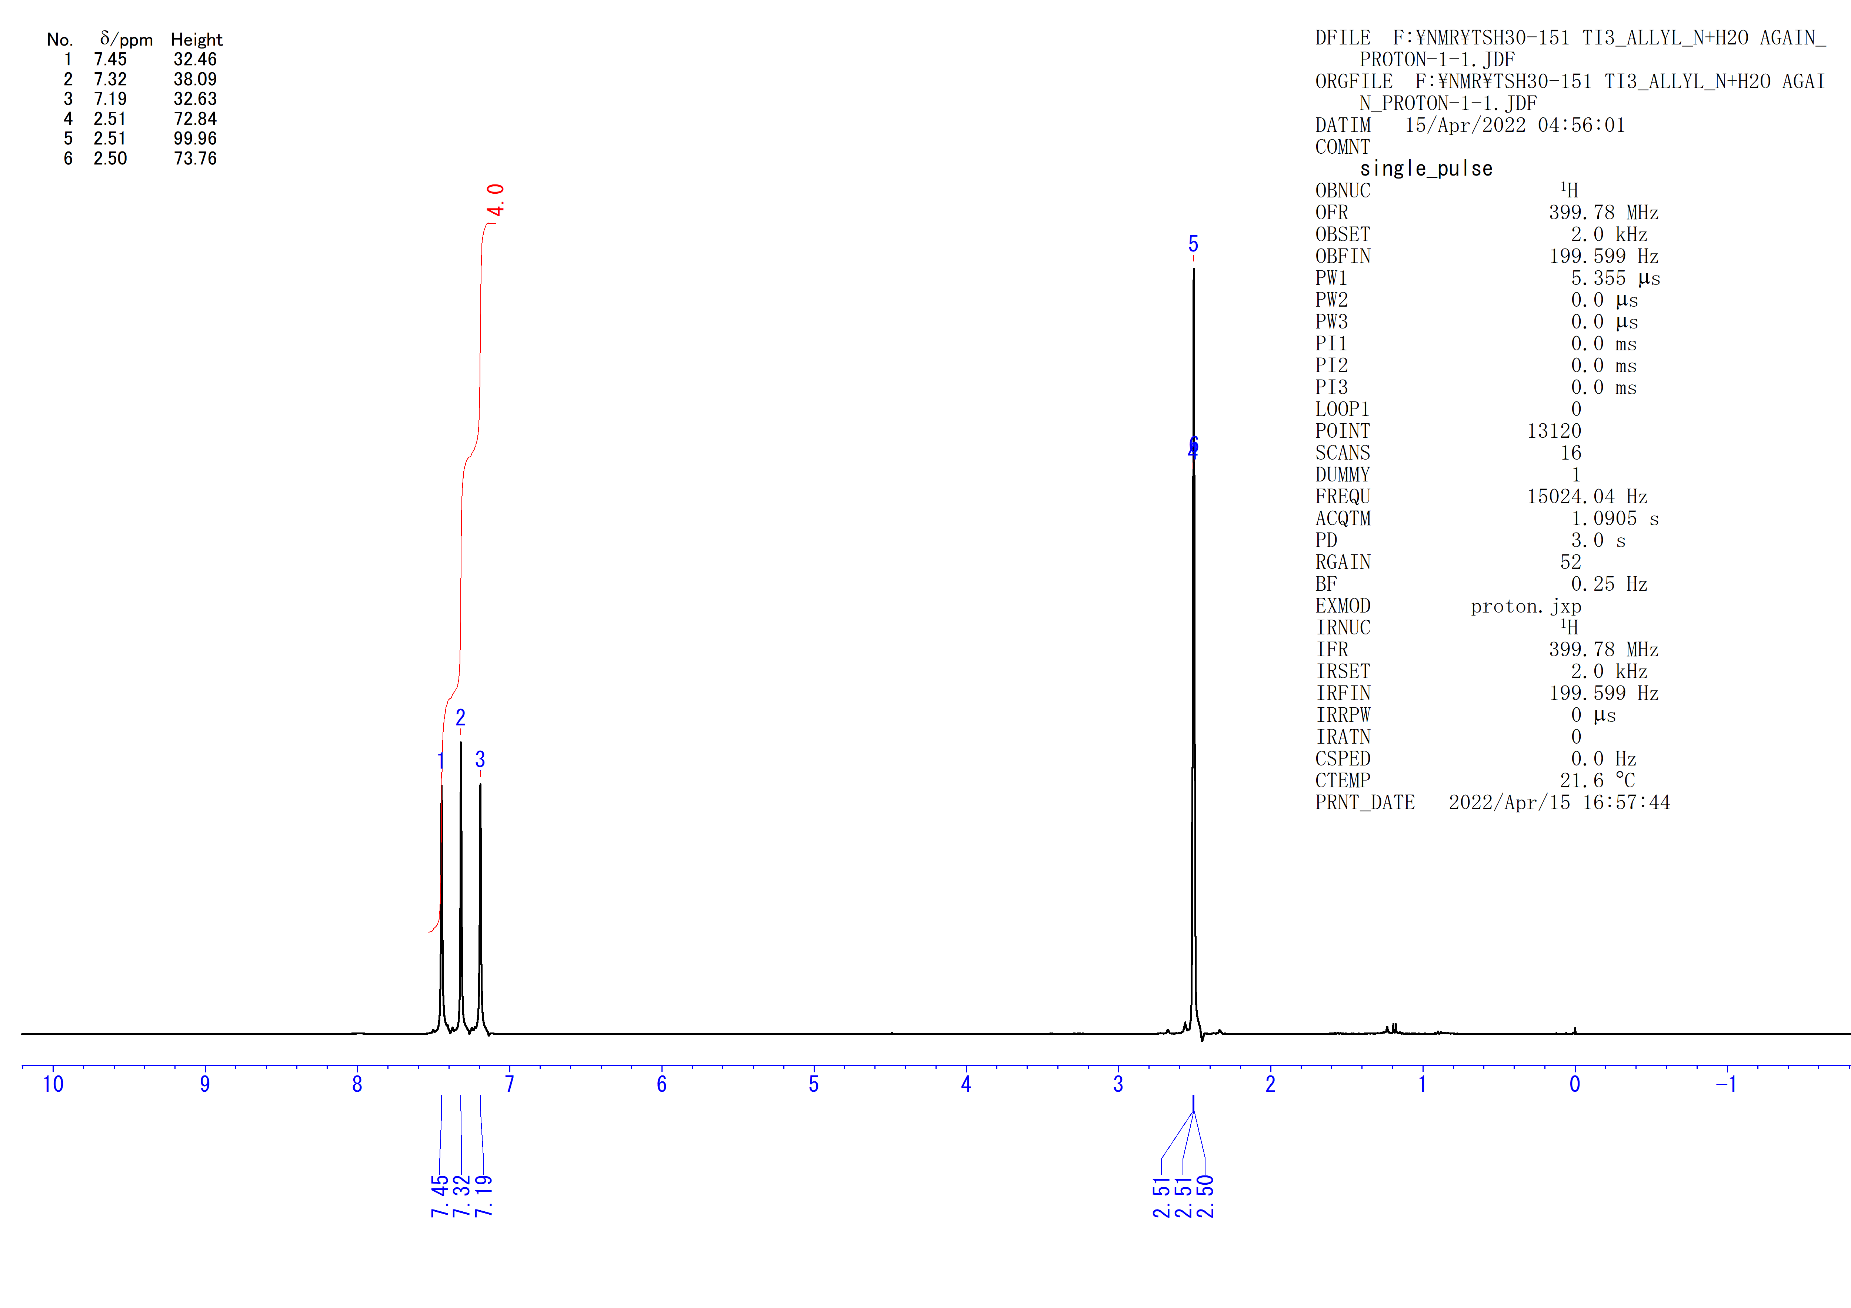


**Figure S50.** 1H NMR spectrum of NH4Cl (dmso-*d*6, rt).

**Hydrolysis of 5 with H2O**

Degassed H2O (5.0 M in THF, 200 µl, 1 mmol) was added to a 5 ml toluene solution of complex **5** (41 mg, 0.052 mmol) under vigorously stirring at −78 oC. After 1 h, the resulting dark-red suspension was separated by a “trap-to-trap” technique. The solid residue was treated with an excess amount of ether solution of HCl (1.0 M, 500 µl). The resulting orange–red solution was evaporated to give (C5Me4SiMe3)TiCl3 (46 mg, 0.13 mmol, 83%). The volatile part obtained in the above “trap-to-trap” separation was treated with HCl (1.0 M in ether, 0.5 ml), which led to immediate formation of mixture of *i*PrNH3Cl (**7a**, 20% NMR) and NH4Cl (144% NMR) as white solid (5.0 mg). As the same manner, 15N-labeled compounds *i*Pr15NH3Cl (**7a-15N**, 31% NMR) and 15NH4Cl (69% NMR) were obtained from **5-15N** and H2O.

***i*PrNH3Cl (7a)**: 1H NMR (dmso-*d*6, rt): *d* 7.98 (brs, 3H, (CH3)2CHN*H*3Cl), 3.26 (m, 1H, (CH3)2C*H*NH3Cl), 1.19 (d, *J*HH = 6.8 Hz, 6H, (C*H*3)2CHNH3Cl). 13C{1H} NMR (dmso-*d*6, rt): *d* 42.9 (s, (CH3)2*C*HNH3Cl), 20.4 (s, (*C*H3)2CHNH3Cl). EI-MS (*m/z*): Calculated for C3H8N ([M-H]+): 58.06567; Found. *m/z* = 58.06569 ([CH3-CH(CH3)-NH]+), 44.04991 ([CH3-CH-NH2]+).

**NH4Cl**: 1H NMR (dmso-*d*6, rt): *d* 7.39 (1:1:1 t, *J*NH = 51 Hz, N*H*4Cl).

***i*Pr15NH3Cl (7a-15N)**: 1H NMR (dmso-*d*6, rt): *d* 7.98 (dd, *J*15NH = 72.0 Hz, *J*HH = 5.6 Hz, 3H, (CH3)2CH15N*H*3Cl), 3.25 (m, 1H, (CH3)2C*H*15NH3Cl), 1.18 (dd, *J*HH = 6.8 Hz, *J*15NH = 2.5 Hz, 6H, (C*H*3)2CH15NH3Cl). 13C{1H} NMR (dmso-*d*6, rt): *d* 42.9 (d, *J*15NH = 4.5 Hz, (CH3)2*C*H15NH3Cl), 20.4 (s, (*C*H3)2CH15NH3Cl). EI-MS: *m/z* = 59.06278 ([CH3-CH(CH3)-15NH]+), 45.04715 ([CH3-CH-15NH2]+).

**15NH4Cl**: 1H NMR (dmso-*d*6, rt): *d* 7.30 (d, *J*15NH = 71 Hz, 15N*H*4Cl).

**1H NMR monitoring of the hydrolysis of 5 with H2O**

Degassed H2O (5.0 M in THF, 4.5 µl, 0.045 mmol) was added to a benzene-*d*6 solution of **5** (4.0 mg, 0.005 mmol) at room temperature. After 3 h, the formation of isopropylamine (**7a**, 47% NMR), propane (29% NMR), and propylene (10% NMR) was confirmed by the 1H NMR analysis.

**Hydrolysis of 8a with H2O**

Degassed H2O (5.0 M in THF, 150 µl, 0.75 mmol) was added to a 5 ml toluene solution of complex **8a** (41 mg, 0.051 mmol) under vigorously stirring at −78 oC. After 1 h at room temperature, the resulting dark-red suspension was separated by a “trap-to-trap” technique. The solid residue was treated with an excess amount of ether solution of HCl (1.0 M, 500 µl). The resulting orange–red solution was evaporated to give (C5Me4SiMe3)TiCl3 (50 mg, 0.15 mmol, 95%). The volatile part obtained in the above “trap-to-trap” separation was treated with HCl (1.0 M in ether, 0.3 ml), which led to immediate formation of mixture of *i*PrNH3Cl (**7a**, 98% NMR) and NH4Cl (71% NMR) as white solid (6.7 mg). **7a** (4 mg, 0.042 mmol, 82%) was isolated by extraction with chloroform.

**1H NMR monitoring of the hydrolysis of 8a with H2O**

Degassed H2O (5.0 M in THF, 6.0 µl, 0.03 mmol) was added to a benzene-*d*6 solution of **8a** (4.0 mg, 0.005 mmol) at room temperature. After 3 h, the quantitative formation of *i*PrNH2 (**7a**) was confirmed by the 1H NMR analysis. No free hydrocarbon units were observed in the reaction mixture.


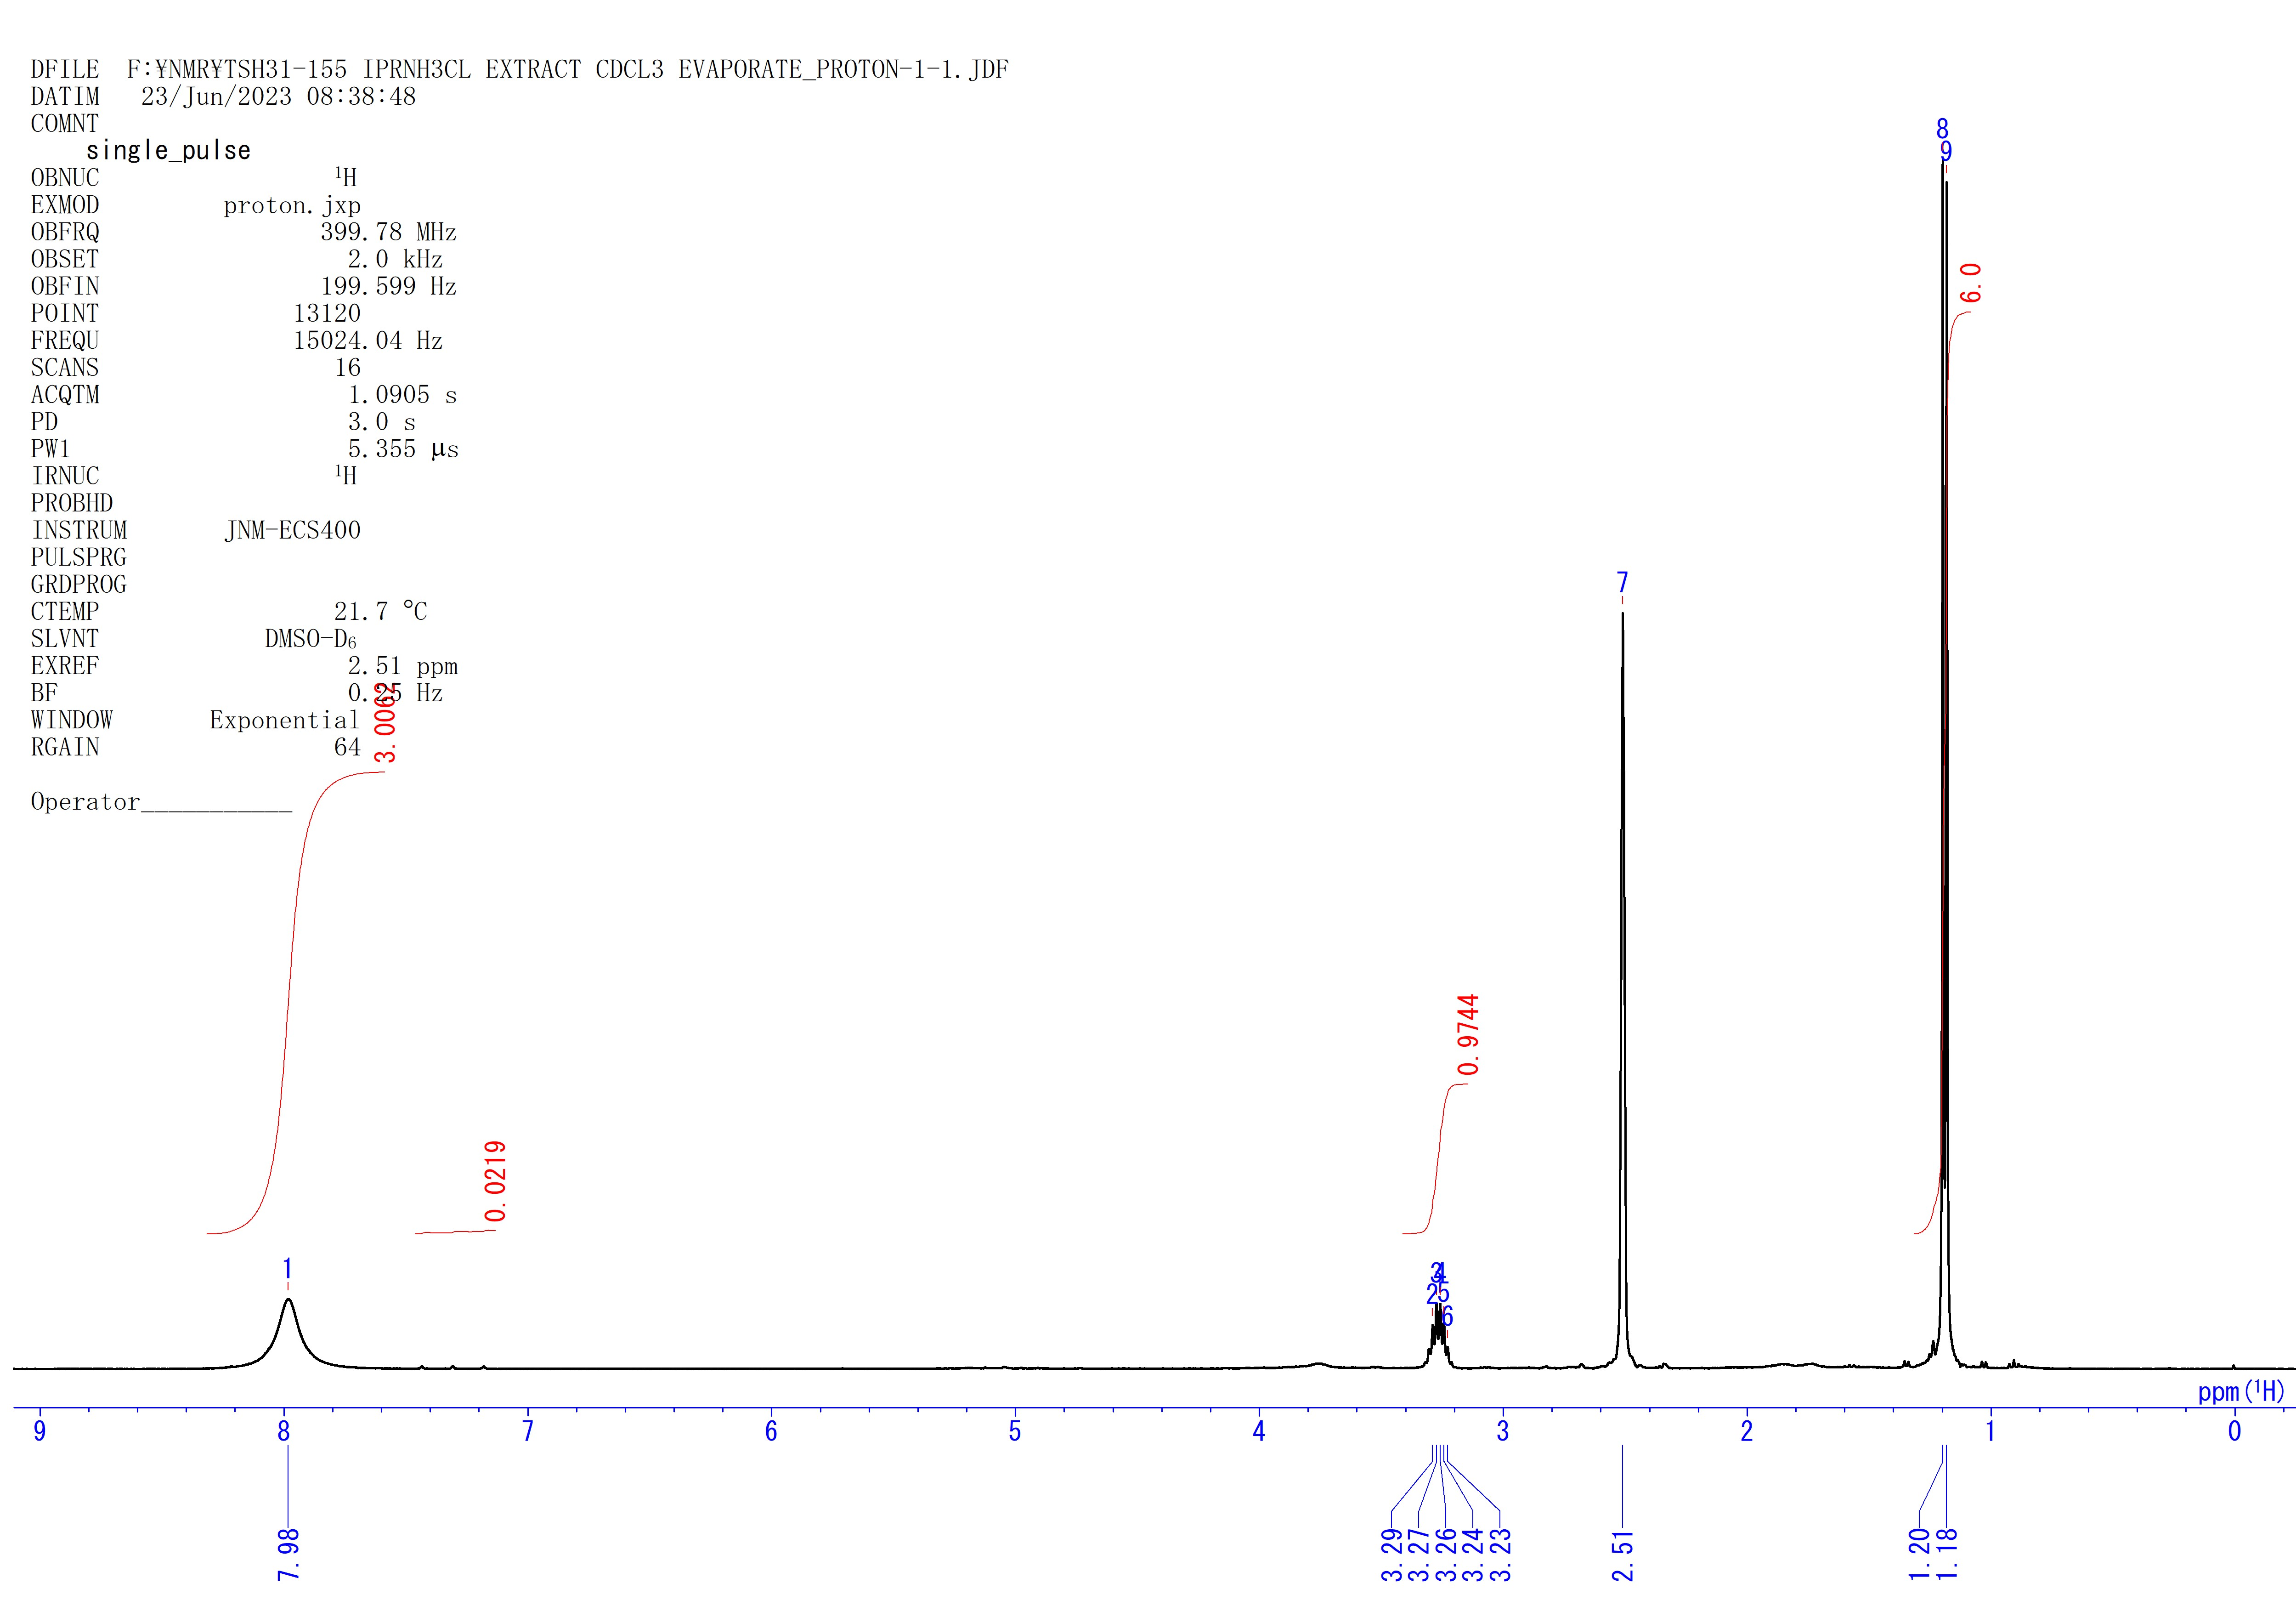


**Figure S51.** 1H NMR spectrum of **7a** (dmso-*d*6, rt).


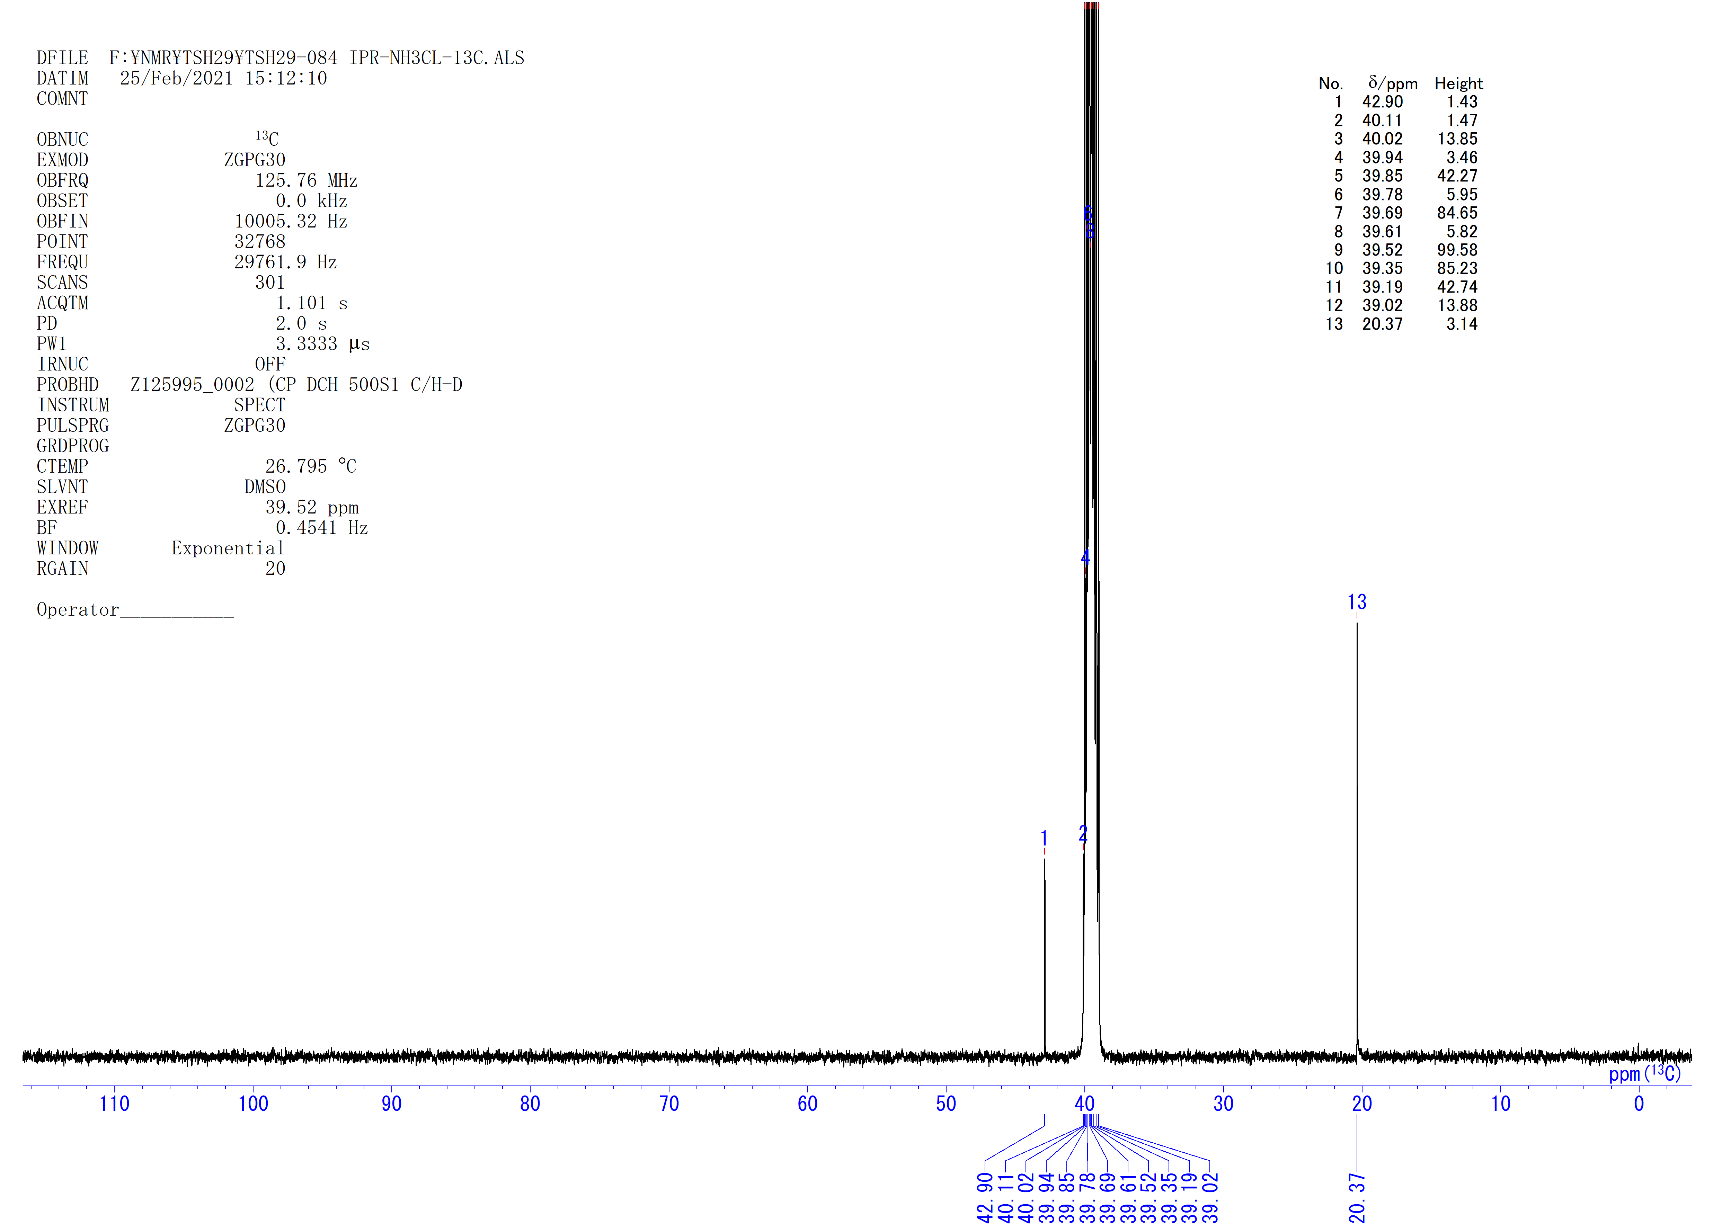


**Figure S52.** 13C{1H} NMR spectrum of **7a** (dmso-*d*6, rt).


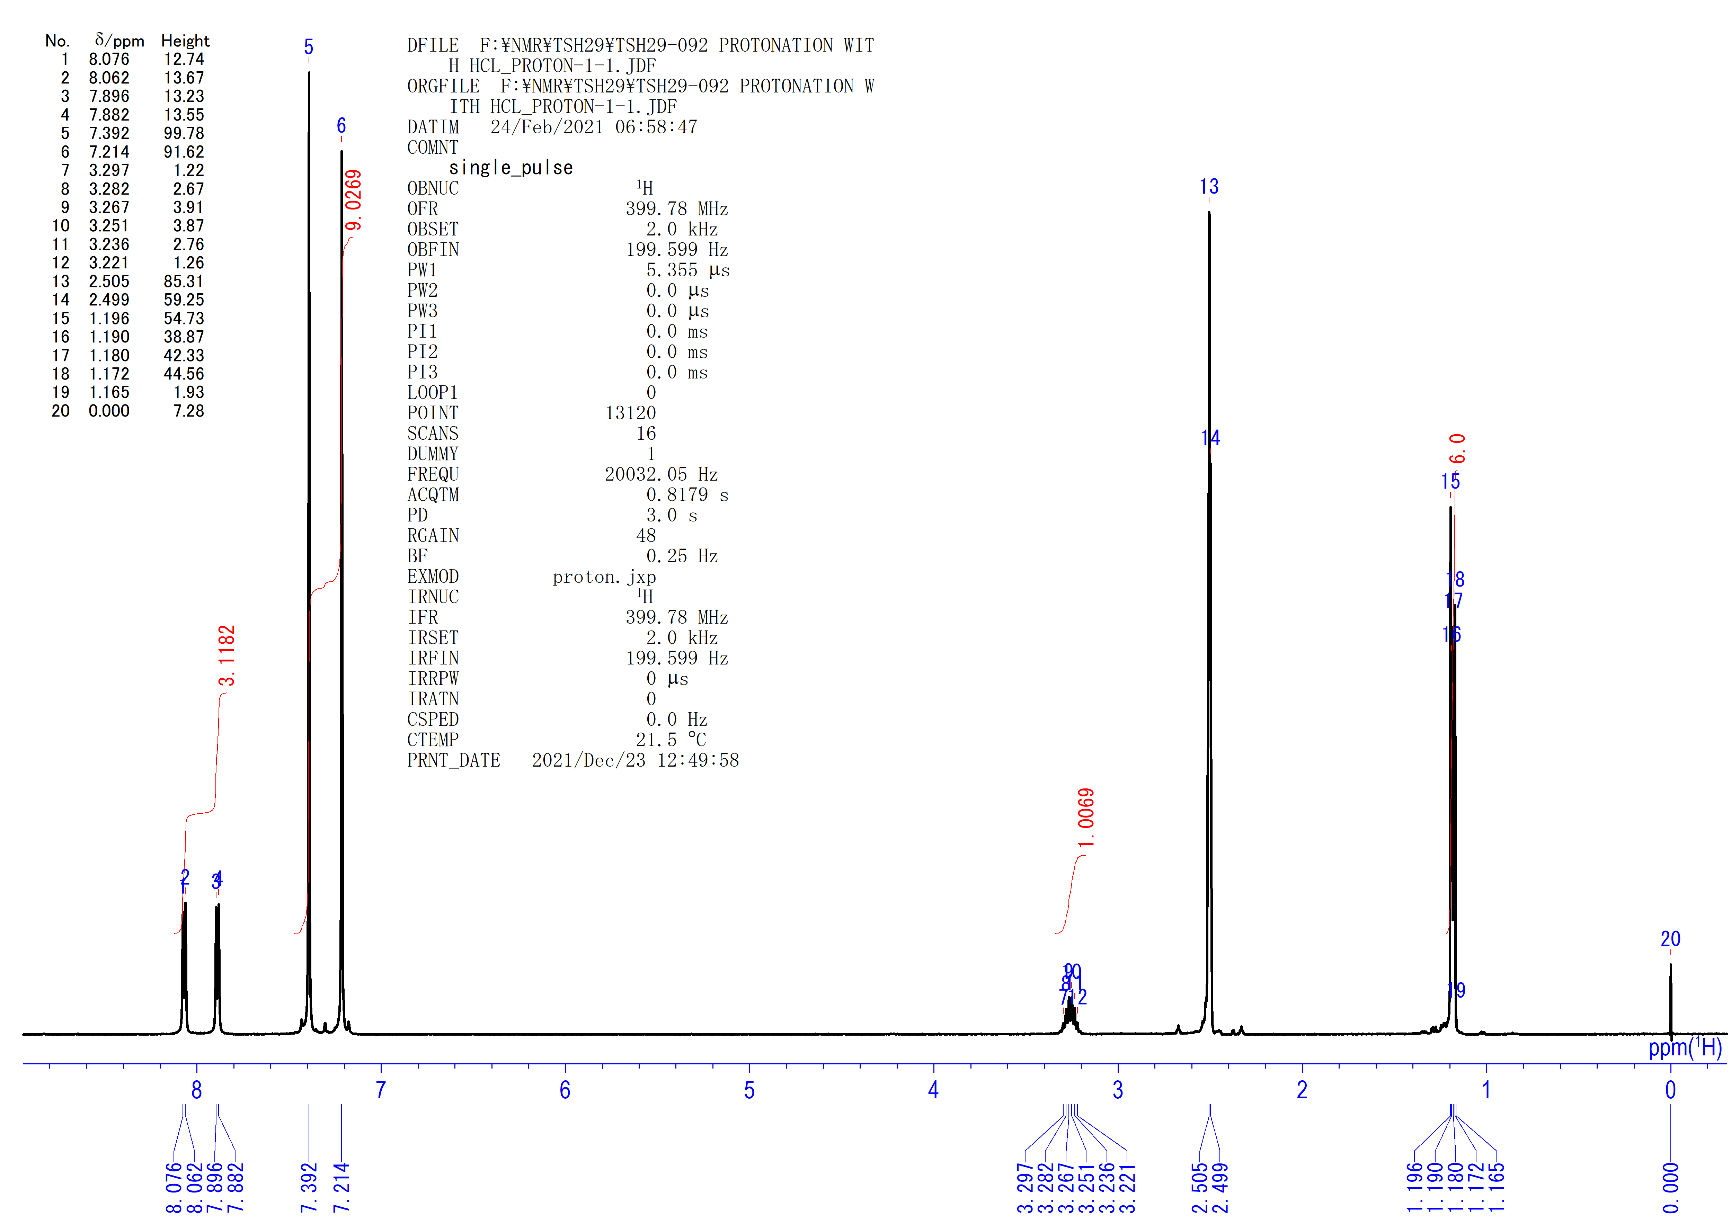


**Figure S53.** 1H NMR spectrum of **7a-15N** and 15NH4Cl (dmso-*d*6, rt).


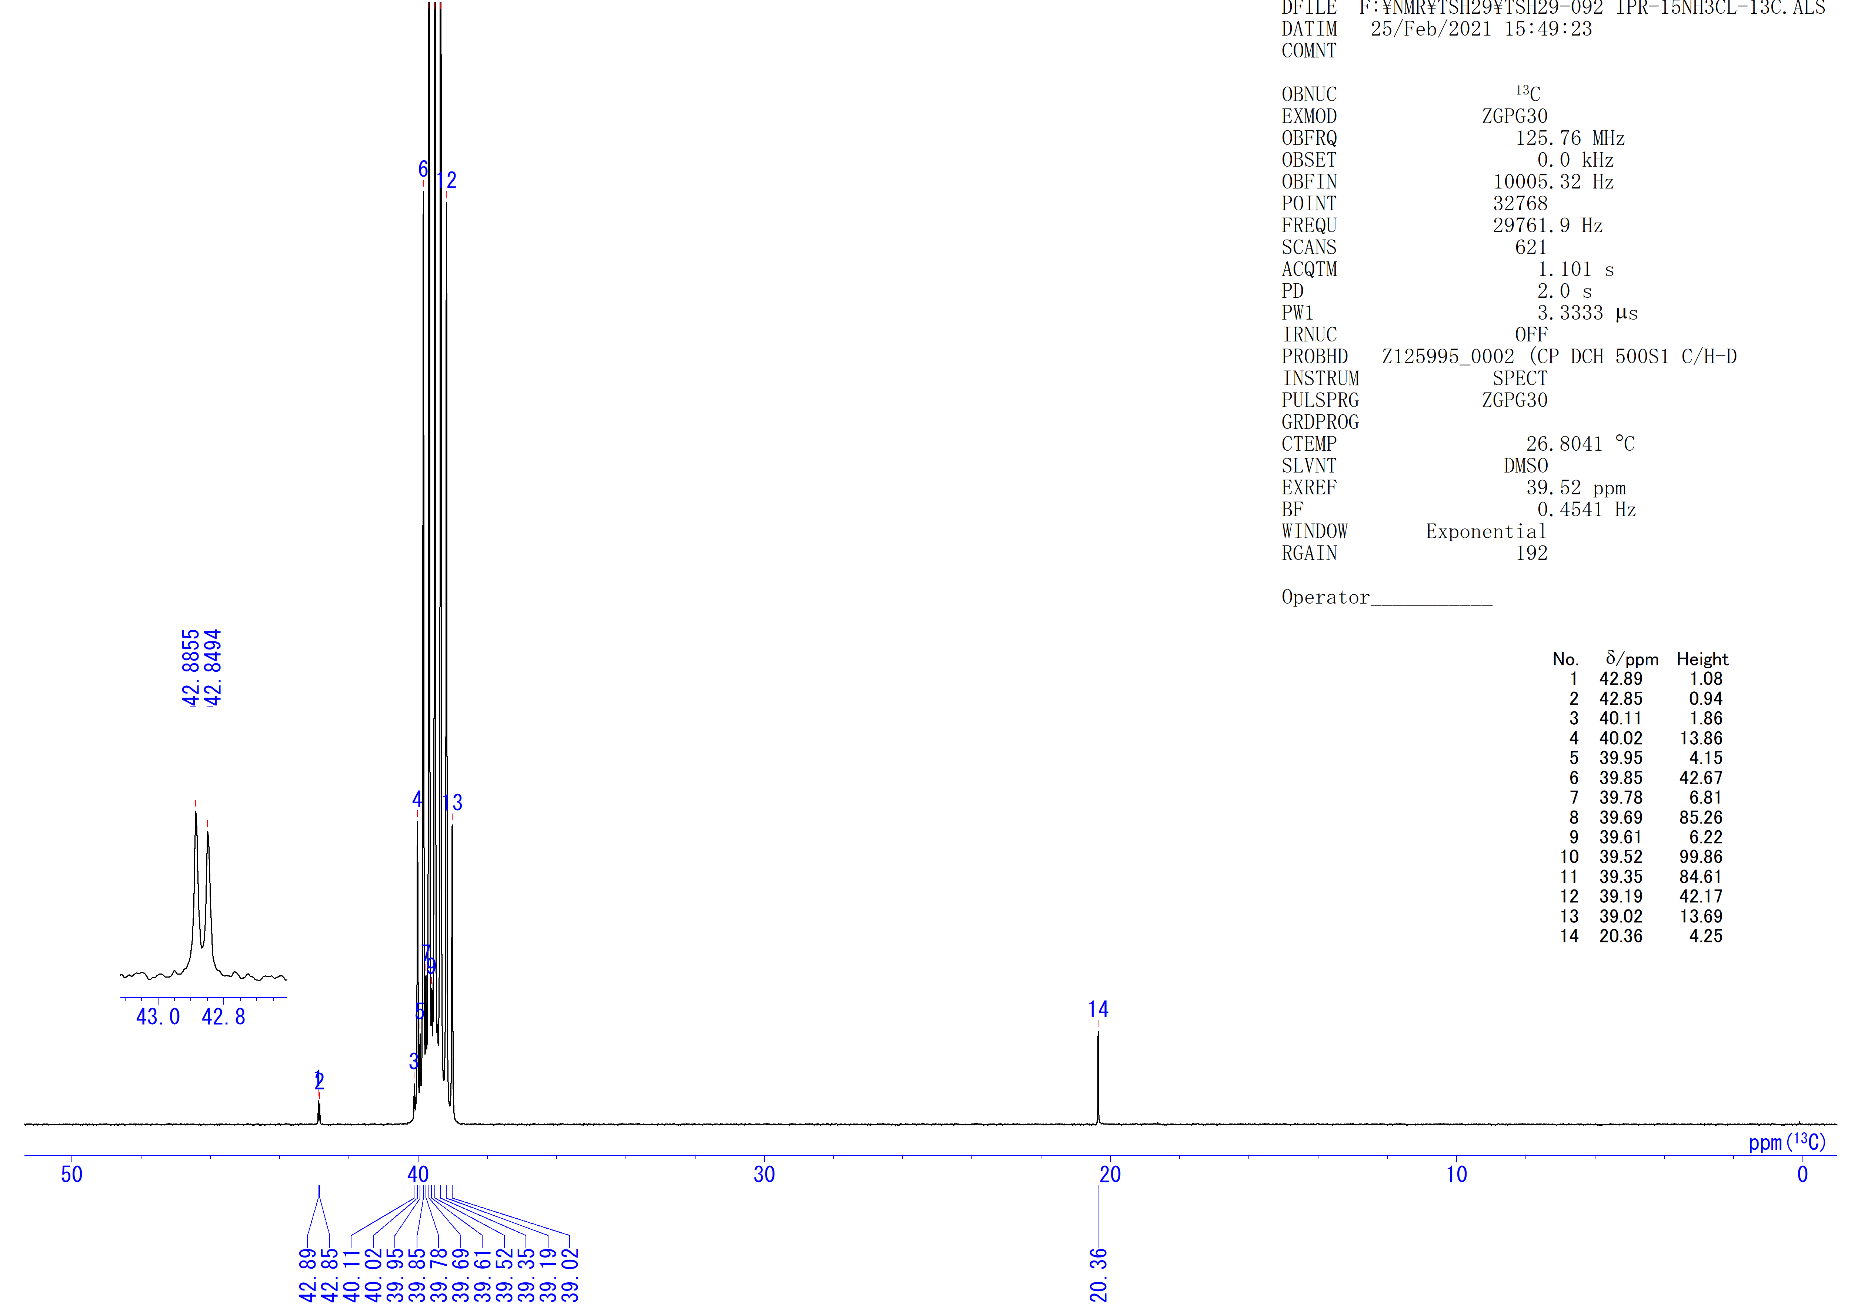


**Figure S54.** 13C{1H} NMR spectrum of **7a-15N** (dmso-*d*6, rt).

**
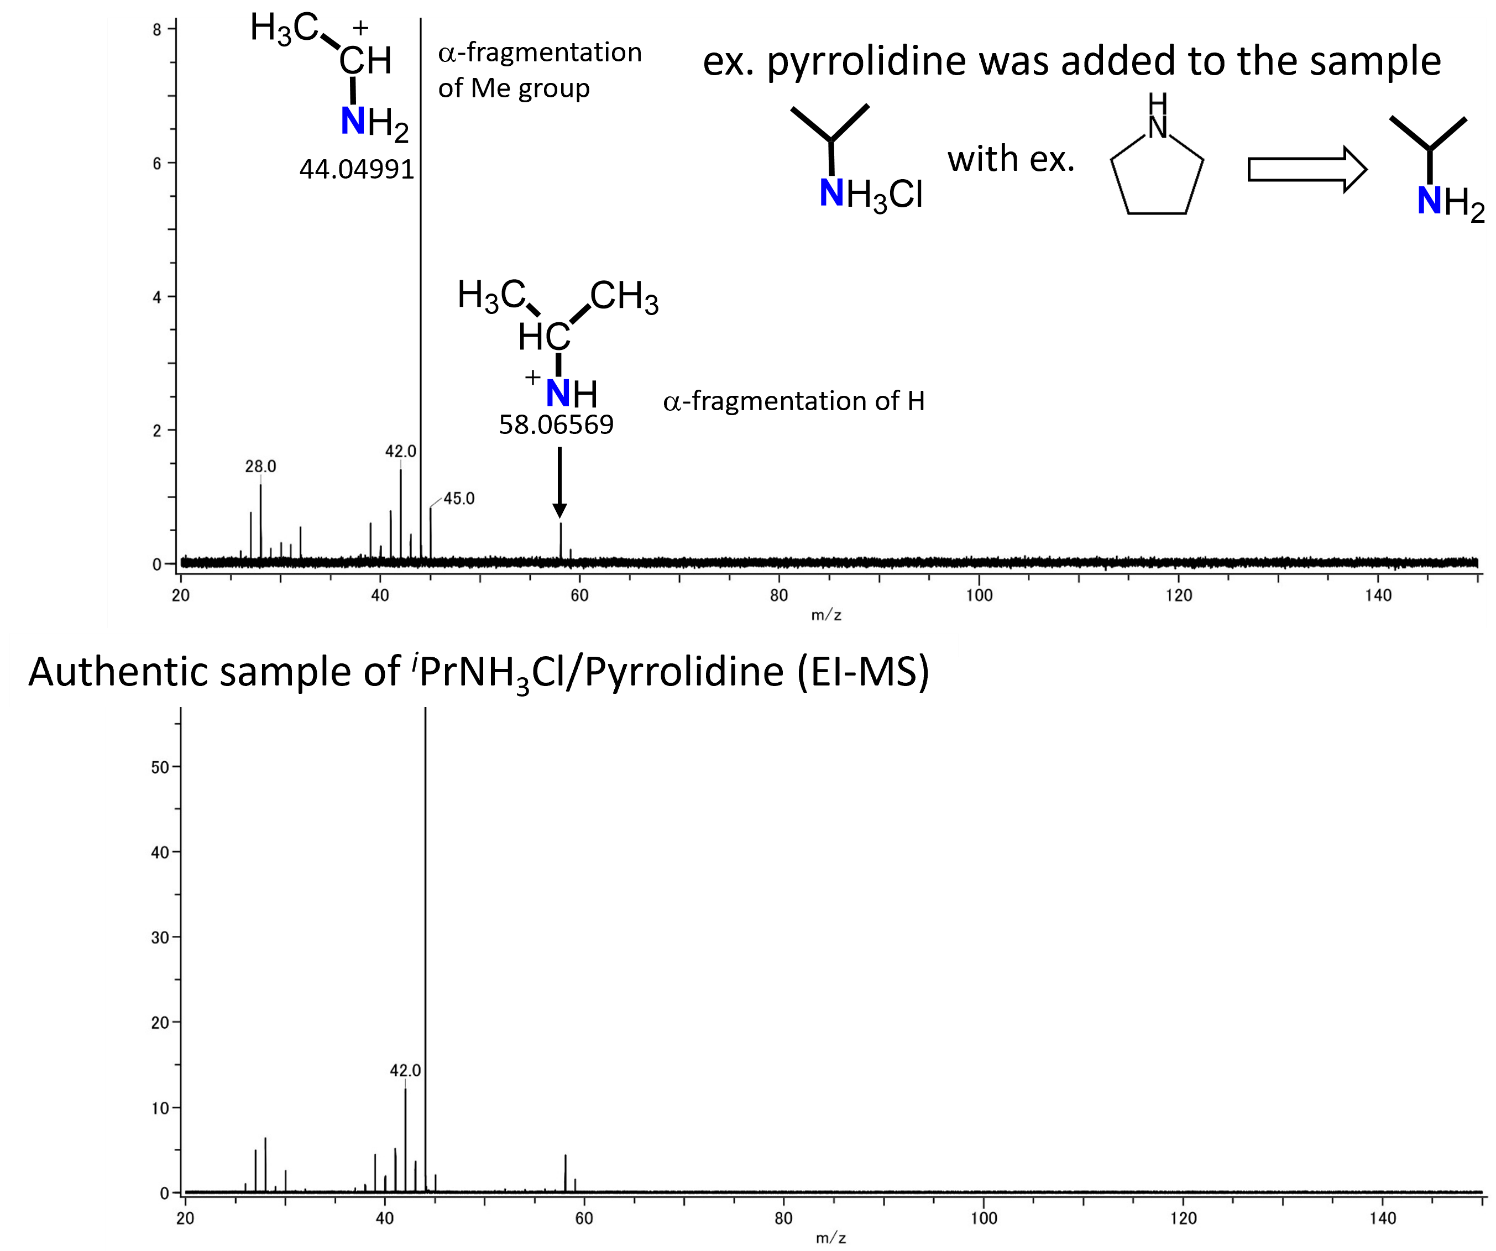
**

**
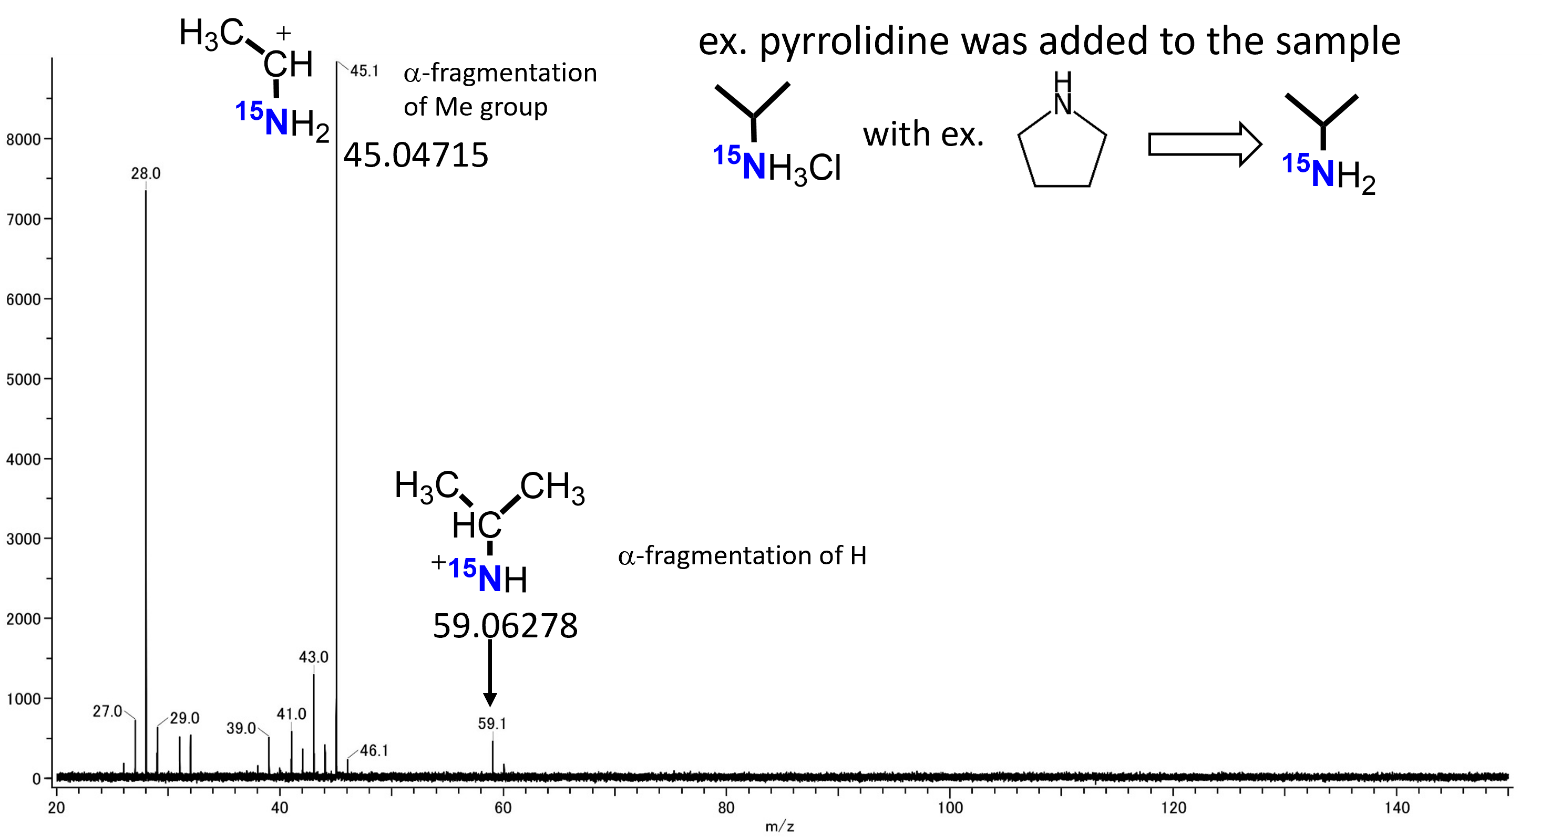
**

**Figure S55.** EI-MS spectra of **7a**, authentic sample, and **7a-15N**.

**Hydrolysis of 8b with H2O**

Degassed H2O (5.0 M in THF, 200 µl, 1 mmol) was added to a 3 ml toluene solution of complex **8b** (43 mg, 0.053 mmol) under vigorously stirring at −78 oC. After 2 h at room temperature, the resulting dark-red suspension was separated by a “trap-to-trap” technique. The solid residue was treated with an excess amount of ether solution of HCl (1.0 M in ether, 500 µl). The resulting orange–red solution was evaporated to give (C5Me4SiMe3)TiCl3 (50 mg, 0.15 mmol, 91%). The volatile part obtained in the above “trap-to-trap” separation was treated with HCl (1.0 M in ether, 0.3 ml), which led to immediate formation of mixture of MeCH(CH2CH3)NH3Cl (**7b**, 87% NMR) and NH4Cl (70% NMR) as white solid (7 mg).

**7b**: 1H NMR (dmso-*d*6, rt): *d* 8.09 (brs, 3H, CH3CH(CH2CH3)N*H*3Cl), 3.04 (m, 1H, CH3C*H*(CH2CH3)NH3Cl), 1.64 (m, 1H, CH3CH(C*H*2CH3)NH3Cl), 1.47 (m, 1H, CH3CH(C*H*2CH3)NH3Cl), 1.17 (d, *J*HH = 6.4 Hz, 3H, C*H*3CH(CH2CH3)NH3Cl), 0.89 (t, *J*HH = 7.5 Hz, 3H, CH3CH(CH2C*H*3)NH3Cl). 13C{1H} NMR (dmso-*d*6, rt): *d* 48.0 (s, CH3*C*H(CH2CH3)NH3Cl), 27.1 (s, CH3CH(*C*H2CH3)NH3Cl), 17.6 (s, *C*H3CH(CH2CH3)NH3Cl), 9.7 (s, CH3CH(CH2*C*H3)NH3Cl). EI-MS (*m/z*): Calculated for C4H10N ([M-H]+): 72.0813; Found. *m/z* = 72.08123 ([CH3-CH2-CH(CH3)-NH]+), 58.06557([CH3-CH2-CH-NH2]+), 44.04986 ([CH3-CH-NH2]+).


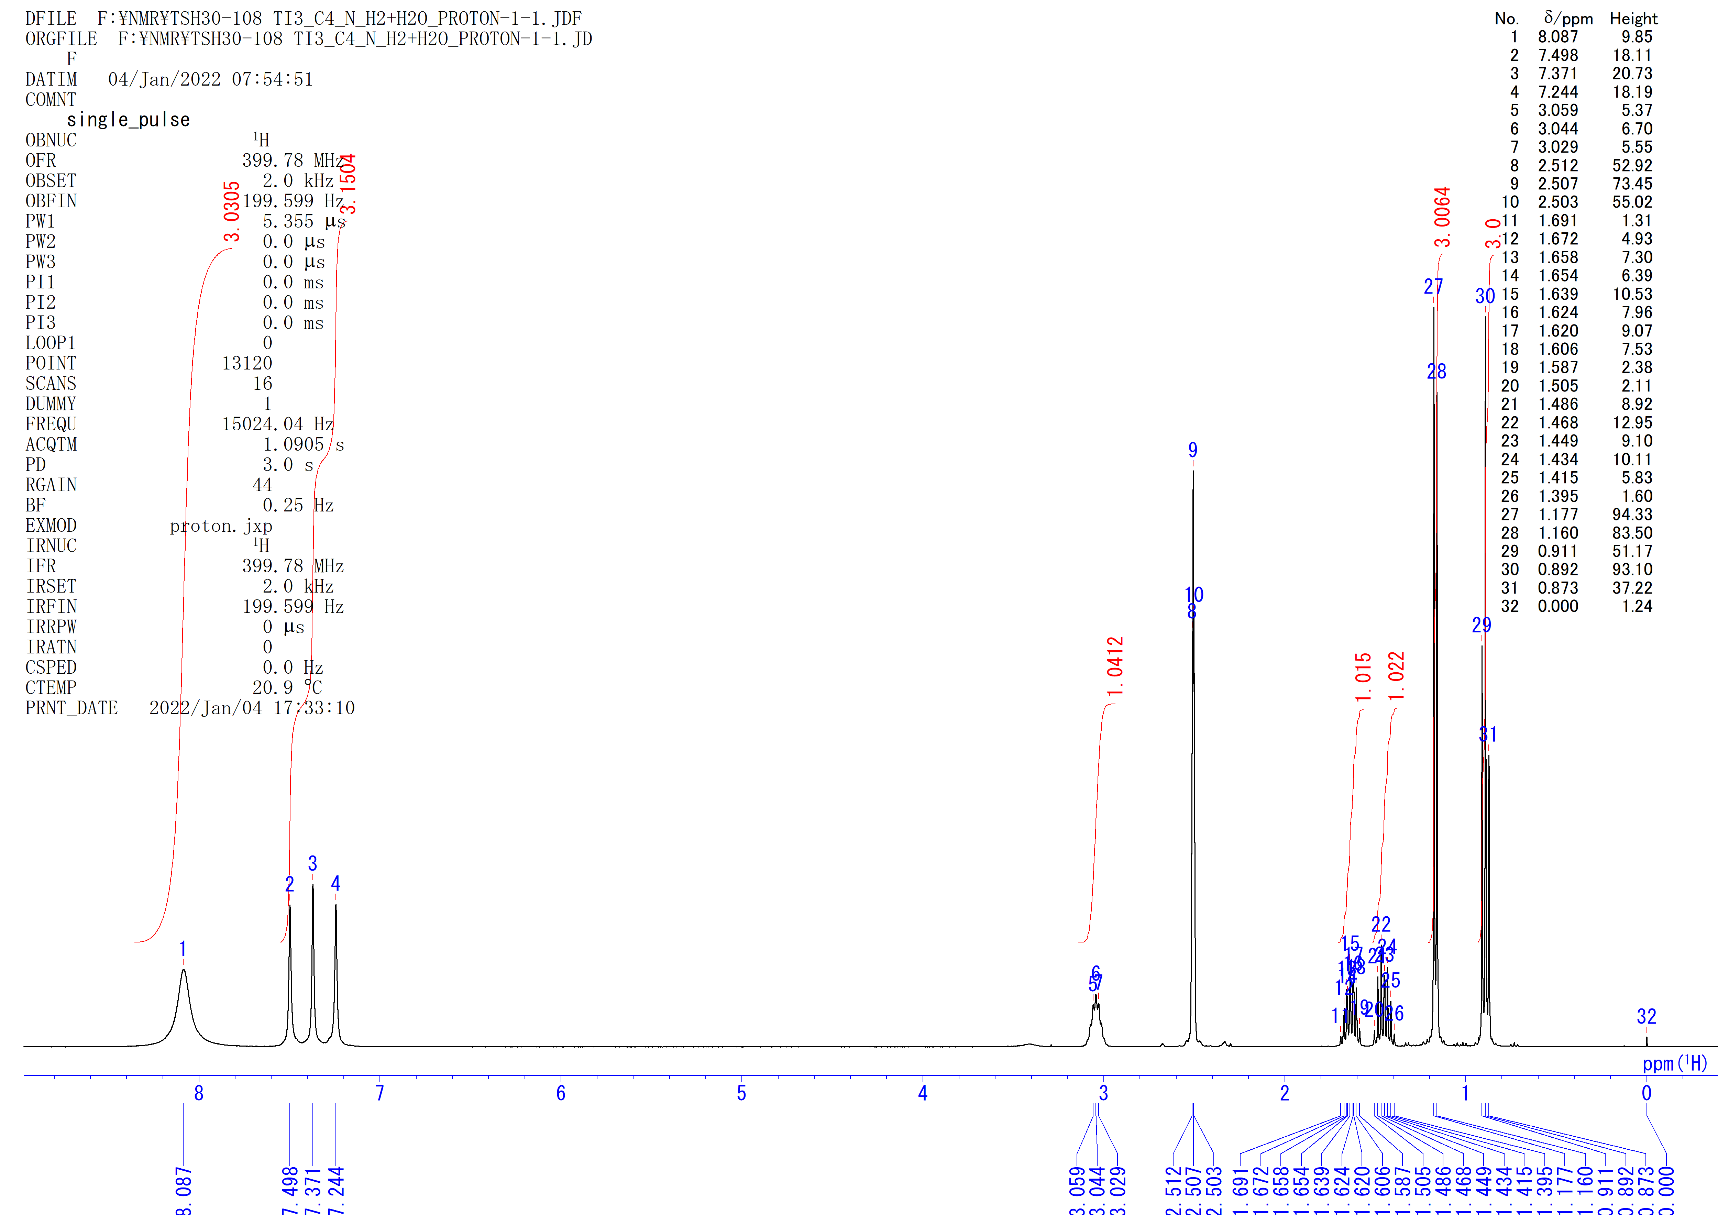


**Figure S56.** 1H NMR spectrum of **7b** and NH4Cl (dmso-*d*6, rt).


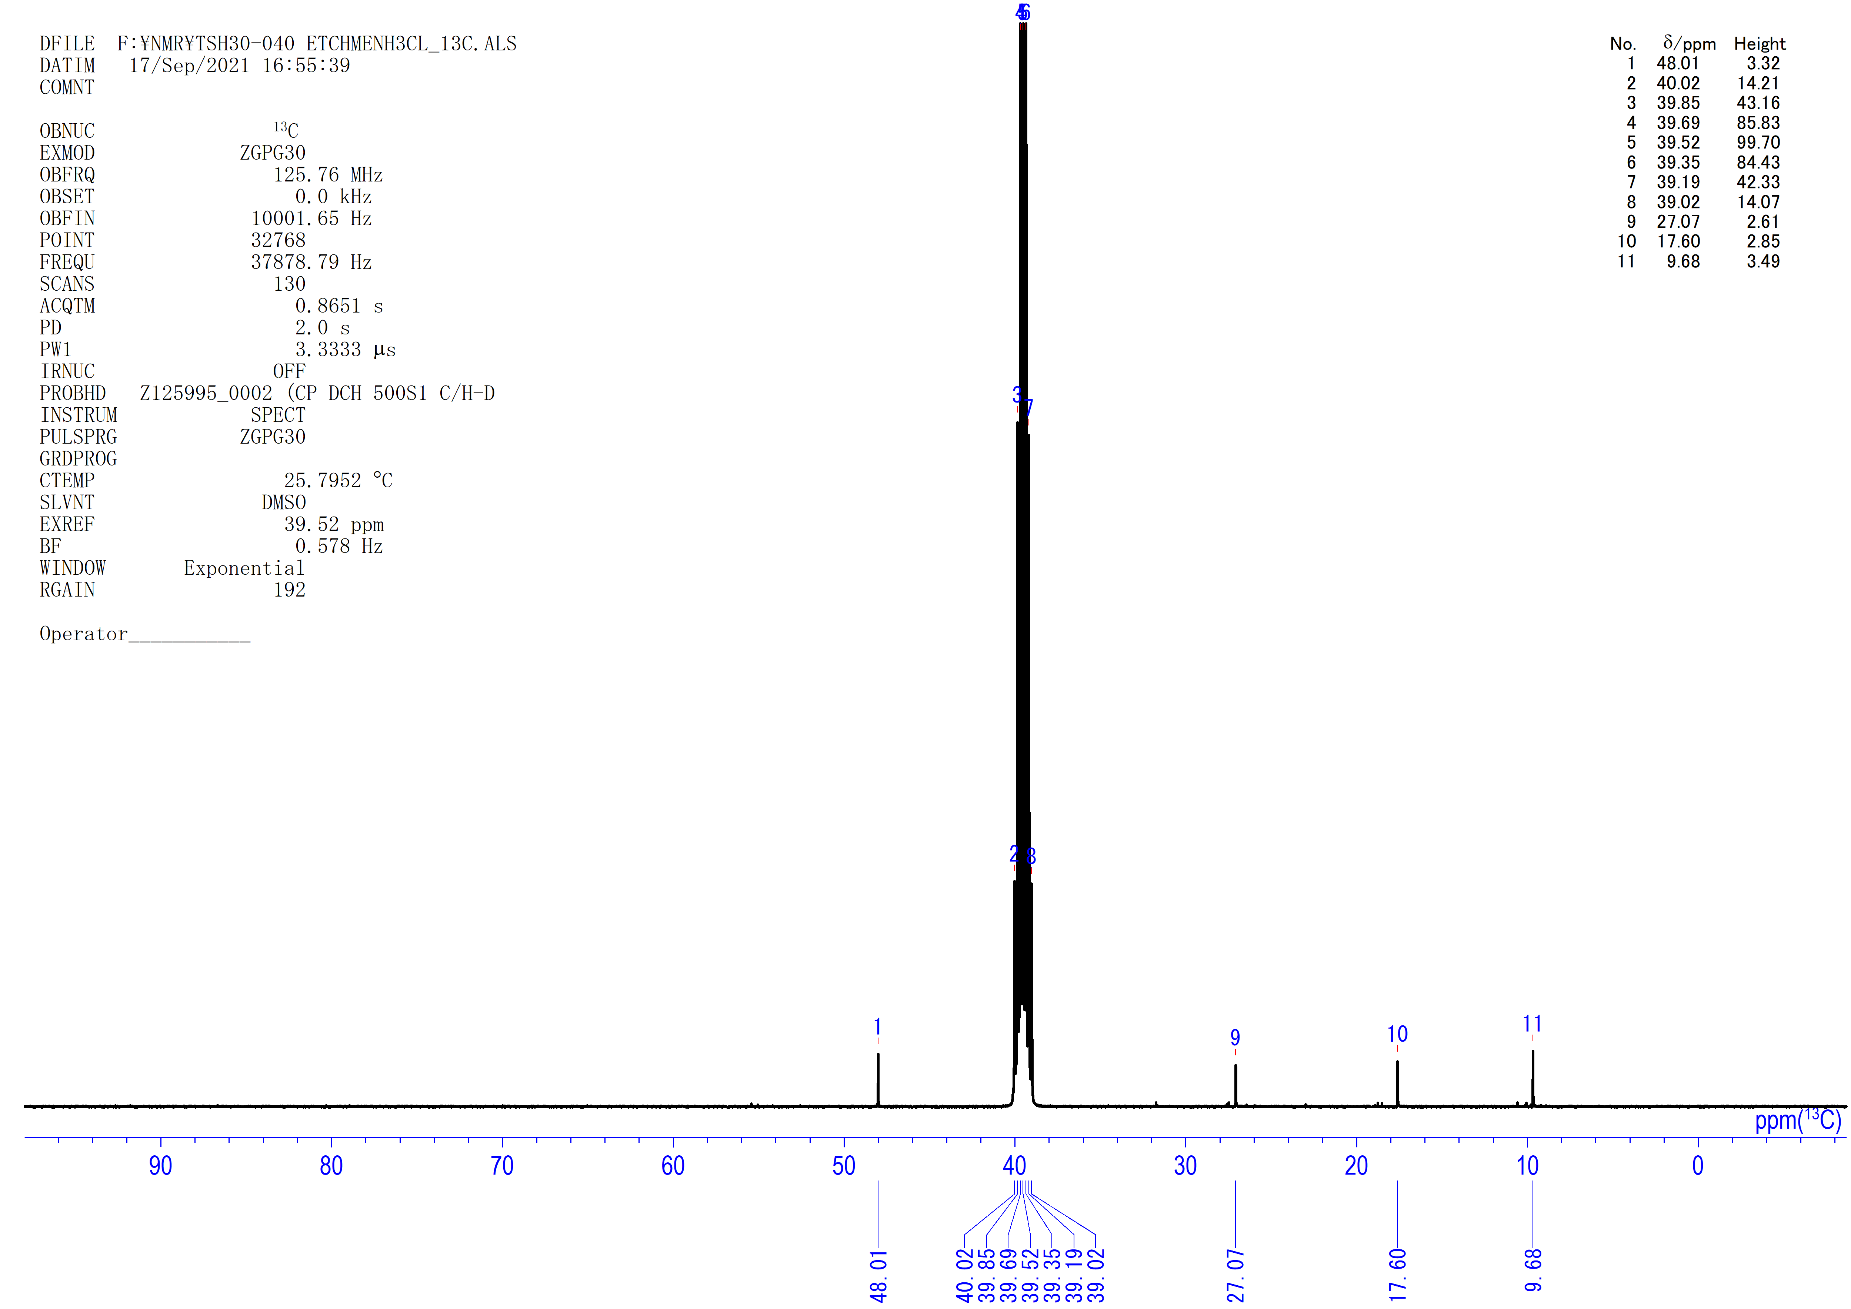


**Figure S57.** 13C NMR spectrum of **7b** (dmso-*d*6, rt).

**Hydrolysis of 8c with H2O**

Degassed H2O (5.0 M in THF, 200 µl, 1 mmol) was added to a 3 ml toluene solution of complex **8c** (51 mg, 0.061 mmol) under vigorously stirring at −78 oC. After 1 h at room temperature, the resulting dark-red suspension was separated by a “trap-to-trap” technique. The solid residue was treated with an excess amount of ether solution of HCl (1.0 M in ether, 500 µl). The resulting orange–red solution was evaporated to give (C5Me4SiMe3)TiCl3 (60 mg, 0.17 mmol, 93%). The volatile part obtained in the above “trap-to-trap” separation was treated with HCl (1.0 M in ether, 0.3 ml), which led to immediate formation of mixture of MeCH(CH2CH2CH3)NH3Cl (**7c**, 87% NMR) and NH4Cl (77% NMR) as white solid (9 mg).

**7c**: 1H NMR (dmso-*d*6, rt): *d* 8.13 (brs, 3H, CH3CH(CH2CH2CH3)N*H*3Cl), 3.11 (m, 1H, CH3C*H*(CH2CH2CH3)NH3Cl), 1.58 (m, 1H, CH3CH(C*H*2CH2CH3)NH3Cl), 1.33 (m, 3H, CH3CH(C*H*2C*H*2CH3)NH3Cl), 1.18 (d, *J*HH = 6.5 Hz, 3H, C*H*3CH(CH2CH2CH3)NH3Cl), 0.88 (t, *J*HH = 7.1 Hz, 3H, CH3CH(CH2CH2C*H*3)NH3Cl). 13C{1H} NMR (dmso-*d*6, rt): *d* 46.5 (s, CH3*C*H(CH2CH2CH3)NH3Cl), 36.2 (s, CH3CH(*C*H2CH2CH3)NH3Cl), 18.12 (s, *C*H3CH(CH2CH2CH3)NH3Cl), 18.07 (s, CH3CH(CH2*C*H2CH3)NH3Cl), 13.7 (s, CH3CH(CH2CH2*C*H3)NH3Cl). EI-MS (*m/z*): Calculated for C5H12N ([M-H]+): 86.09697; Found. *m/z* = 86.09692 ([CH3-(CH2)2-CH(CH3)-NH]+), 72.08113 ([CH3-(CH2)2-CH-NH2]+), 44.04980 ([CH3-CH-NH2]+).


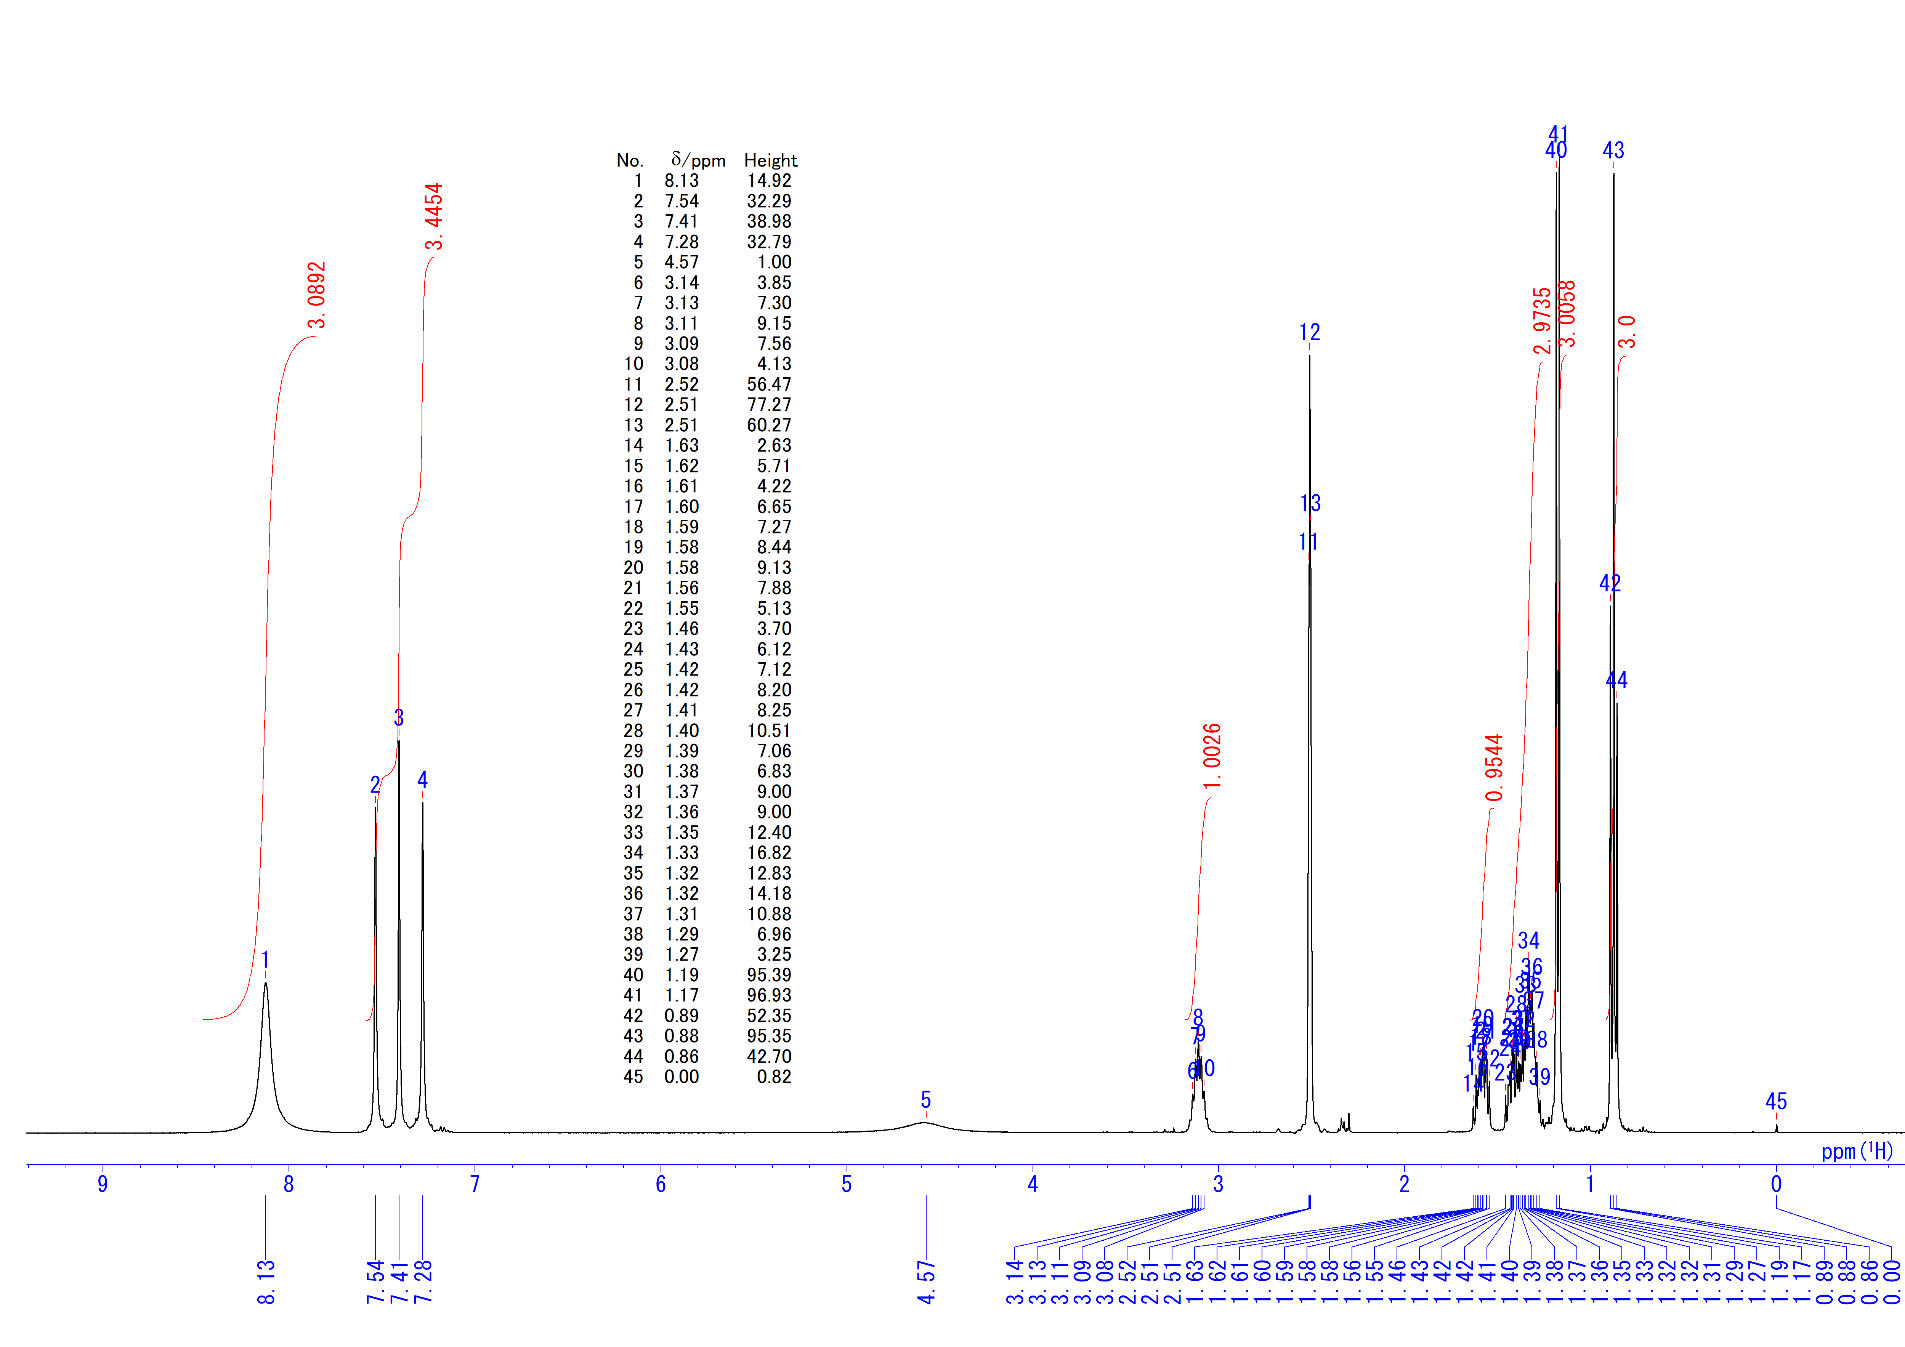


**Figure S58.** 1H NMR spectrum of **7c** and NH4Cl (dmso-*d*6, rt).


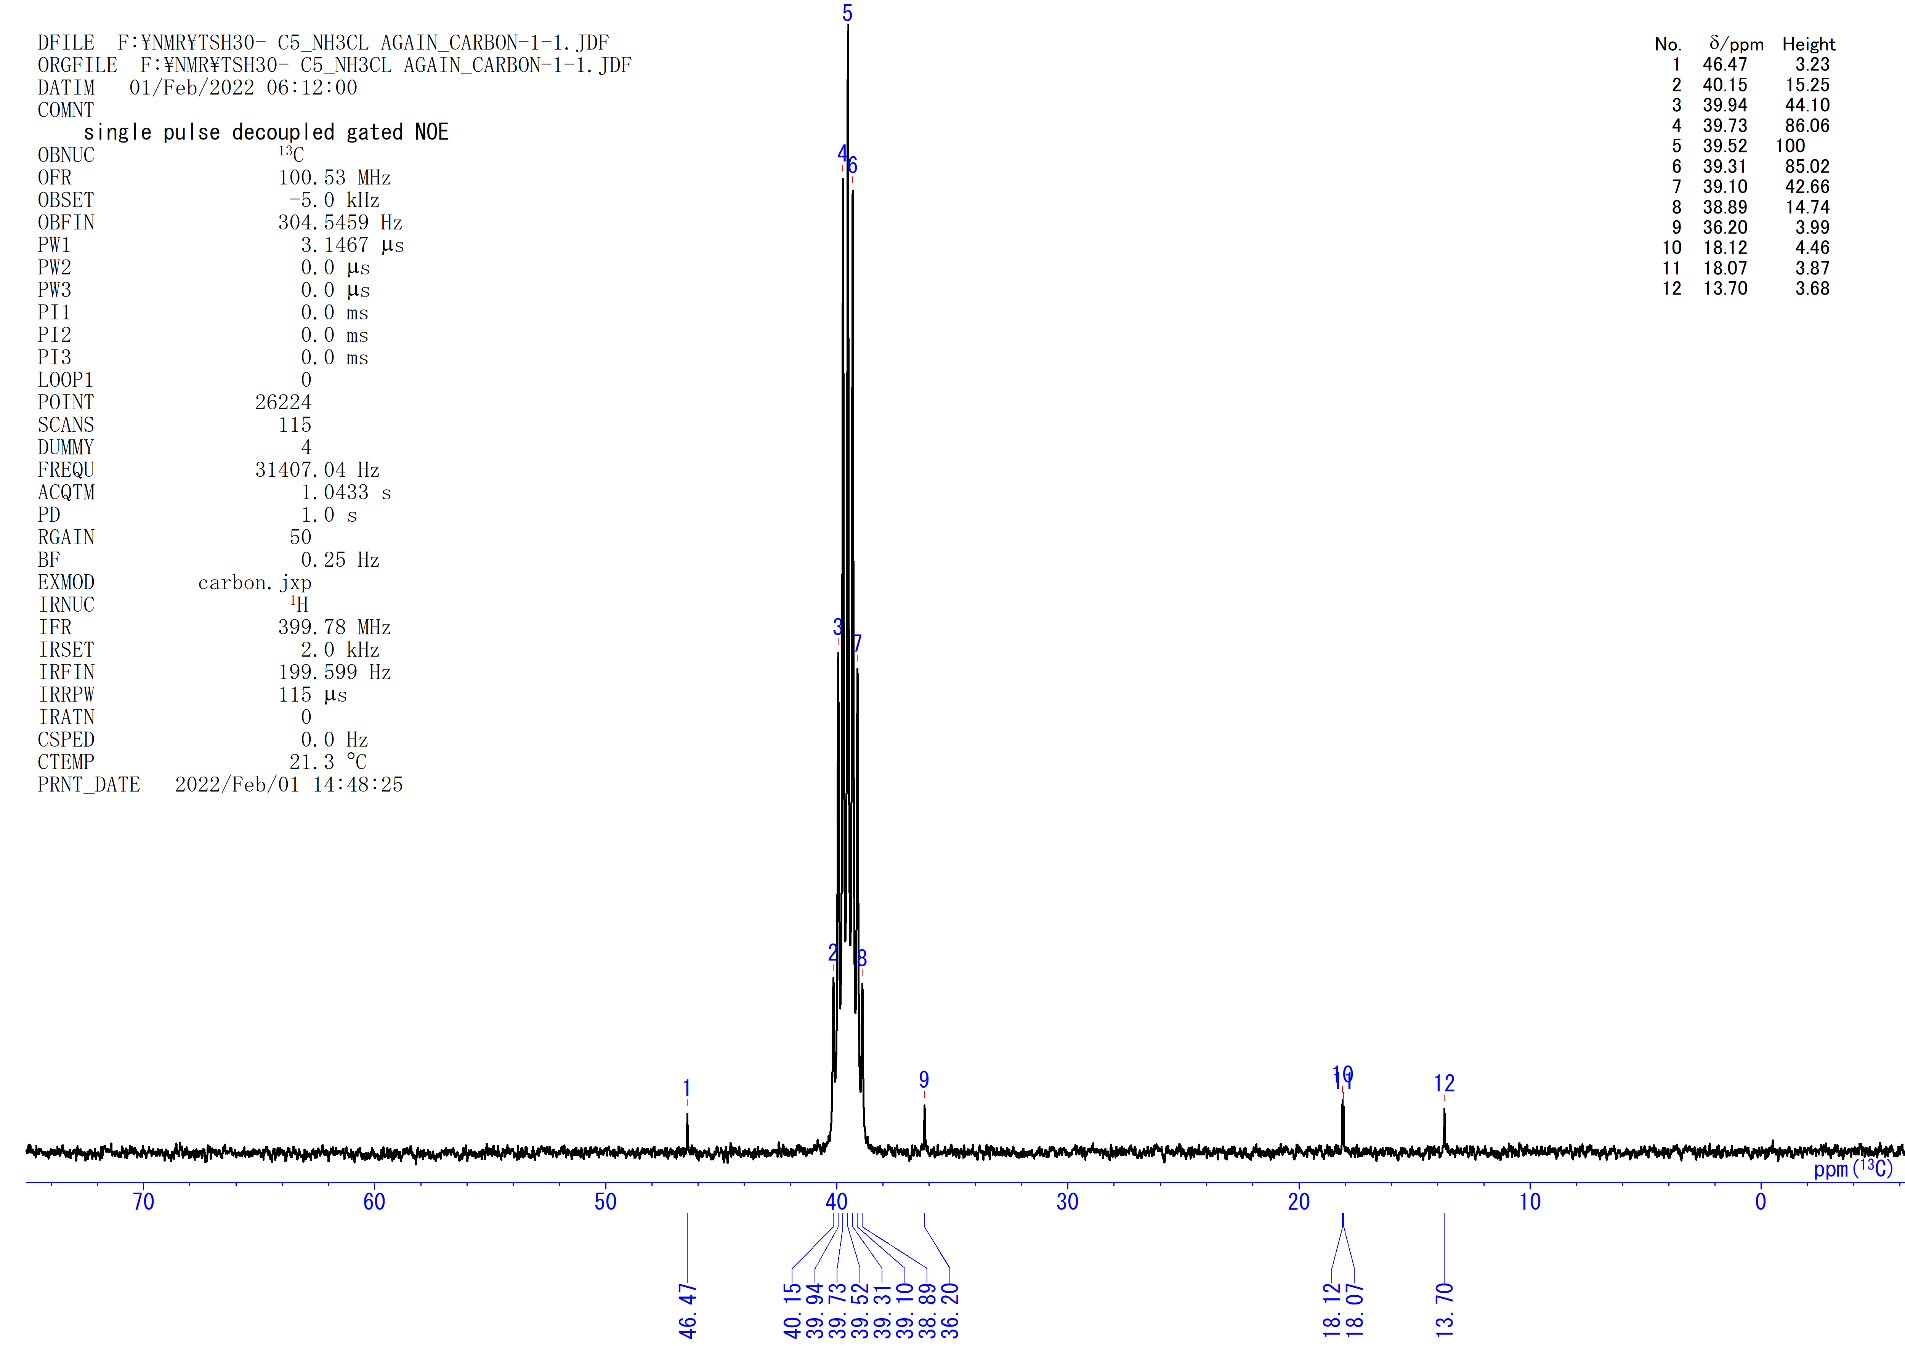


**Figure S59.** 13C{1H} NMR spectrum of **7c** (dmso-*d*6, rt).

**Hydrolysis of 8d with H2O**

Degassed H2O (5.0 M in THF, 200 µl, 1 mmol) was added to a 3 ml toluene solution of complex **8d** (53 mg, 0.063 mmol) under vigorously stirring at −78 oC. After 2 h at room temperature, the resulting dark-red suspension was separated by a “trap-to-trap” technique. The solid residue was treated with an excess amount of ether solution of HCl (1.0 M in ether, 600 µl). The resulting orange–red solution was evaporated to give (C5Me4SiMe3)TiCl3 (60 mg, 0.17 mmol, 90%). The volatile part obtained in the above “trap-to-trap” separation was treated with HCl (1.0 M in ether, 0.3 ml), which led to immediate formation of mixture of MeCH(CH2CH2CH2CH3)NH3Cl (**7d**, 81% NMR) and NH4Cl (59% NMR) as white solid (9.0 mg).

**7d**: 1H NMR (dmso-*d*6, rt): *d* 8.13 (brs, 3H, CH3CH(CH2CH2CH2CH3)N*H*3Cl), 3.09 (m, 1H, CH3C*H*(CH2CH2CH2CH3)NH3Cl), 1.61 (m, 1H, CH3CH(C*H*2CH2CH2CH3)NH3Cl), 1.43 (m, 1H, CH3CH(C*H*2CH2CH2CH3)NH3Cl), 1.28 (m, 4H, CH3CH(CH2C*H*2C*H*2CH3)NH3Cl), 1.18 (d, *J*HH = 6.4 Hz, 3H, C*H*3CH(CH2CH2CH2CH3)NH3Cl), 0.88 (t, *J*HH = 7.2 Hz, 3H, CH3CH(CH2CH2CH2C*H*3)NH3Cl). 13C{1H} NMR (dmso-*d*6, rt): *d* 46.7 (s, CH3*C*H(CH2CH2CH2CH3)NH3Cl), 33.8 (s, CH3CH(*C*H2CH2CH2CH3)NH3Cl), 26.9 (s, CH3CH(CH2*C*H2CH2CH3)NH3Cl), 21.9 (s, *C*H3CH(CH2CH2CH2CH3)NH3Cl), 18.1 (s, CH3CH(CH2CH2*C*H2CH3)NH3Cl), 13.8 (s, CH3CH(CH2CH2CH2*C*H3)NH3Cl). EI-MS (*m/z*): Calculated for C6H14N ([M-H]+): 100.1126; Found. *m/z* = 100.1125 ([CH3-(CH2)3-CH(CH3)-NH]+), 86.09685 ([CH3-(CH2)3-CH-NH2]+), 44.04979 ([CH3-CH-NH2]+).


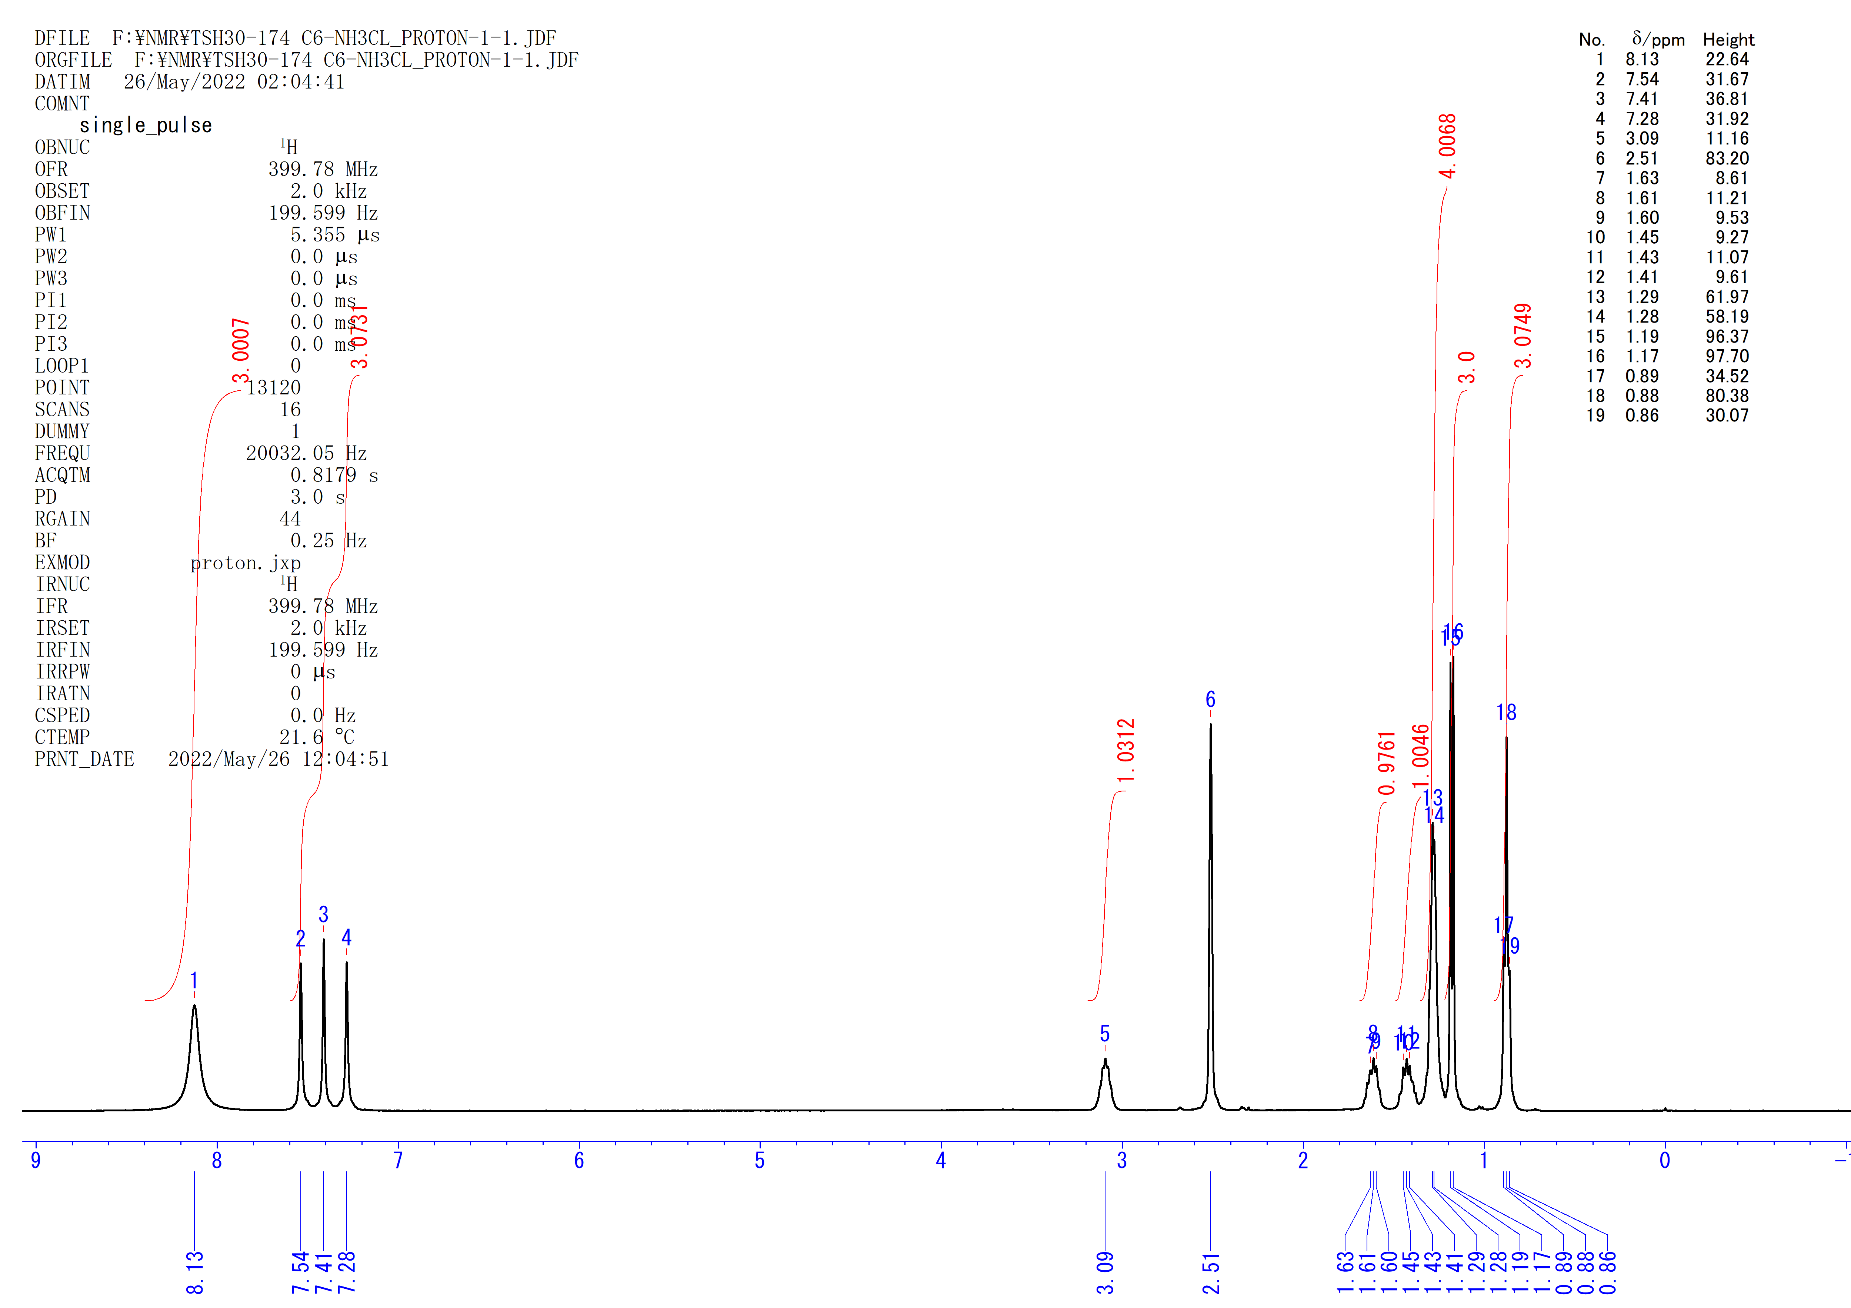


**Figure S60.** 1H NMR spectrum of **7d** and NH4Cl (dmso-*d*6, rt).


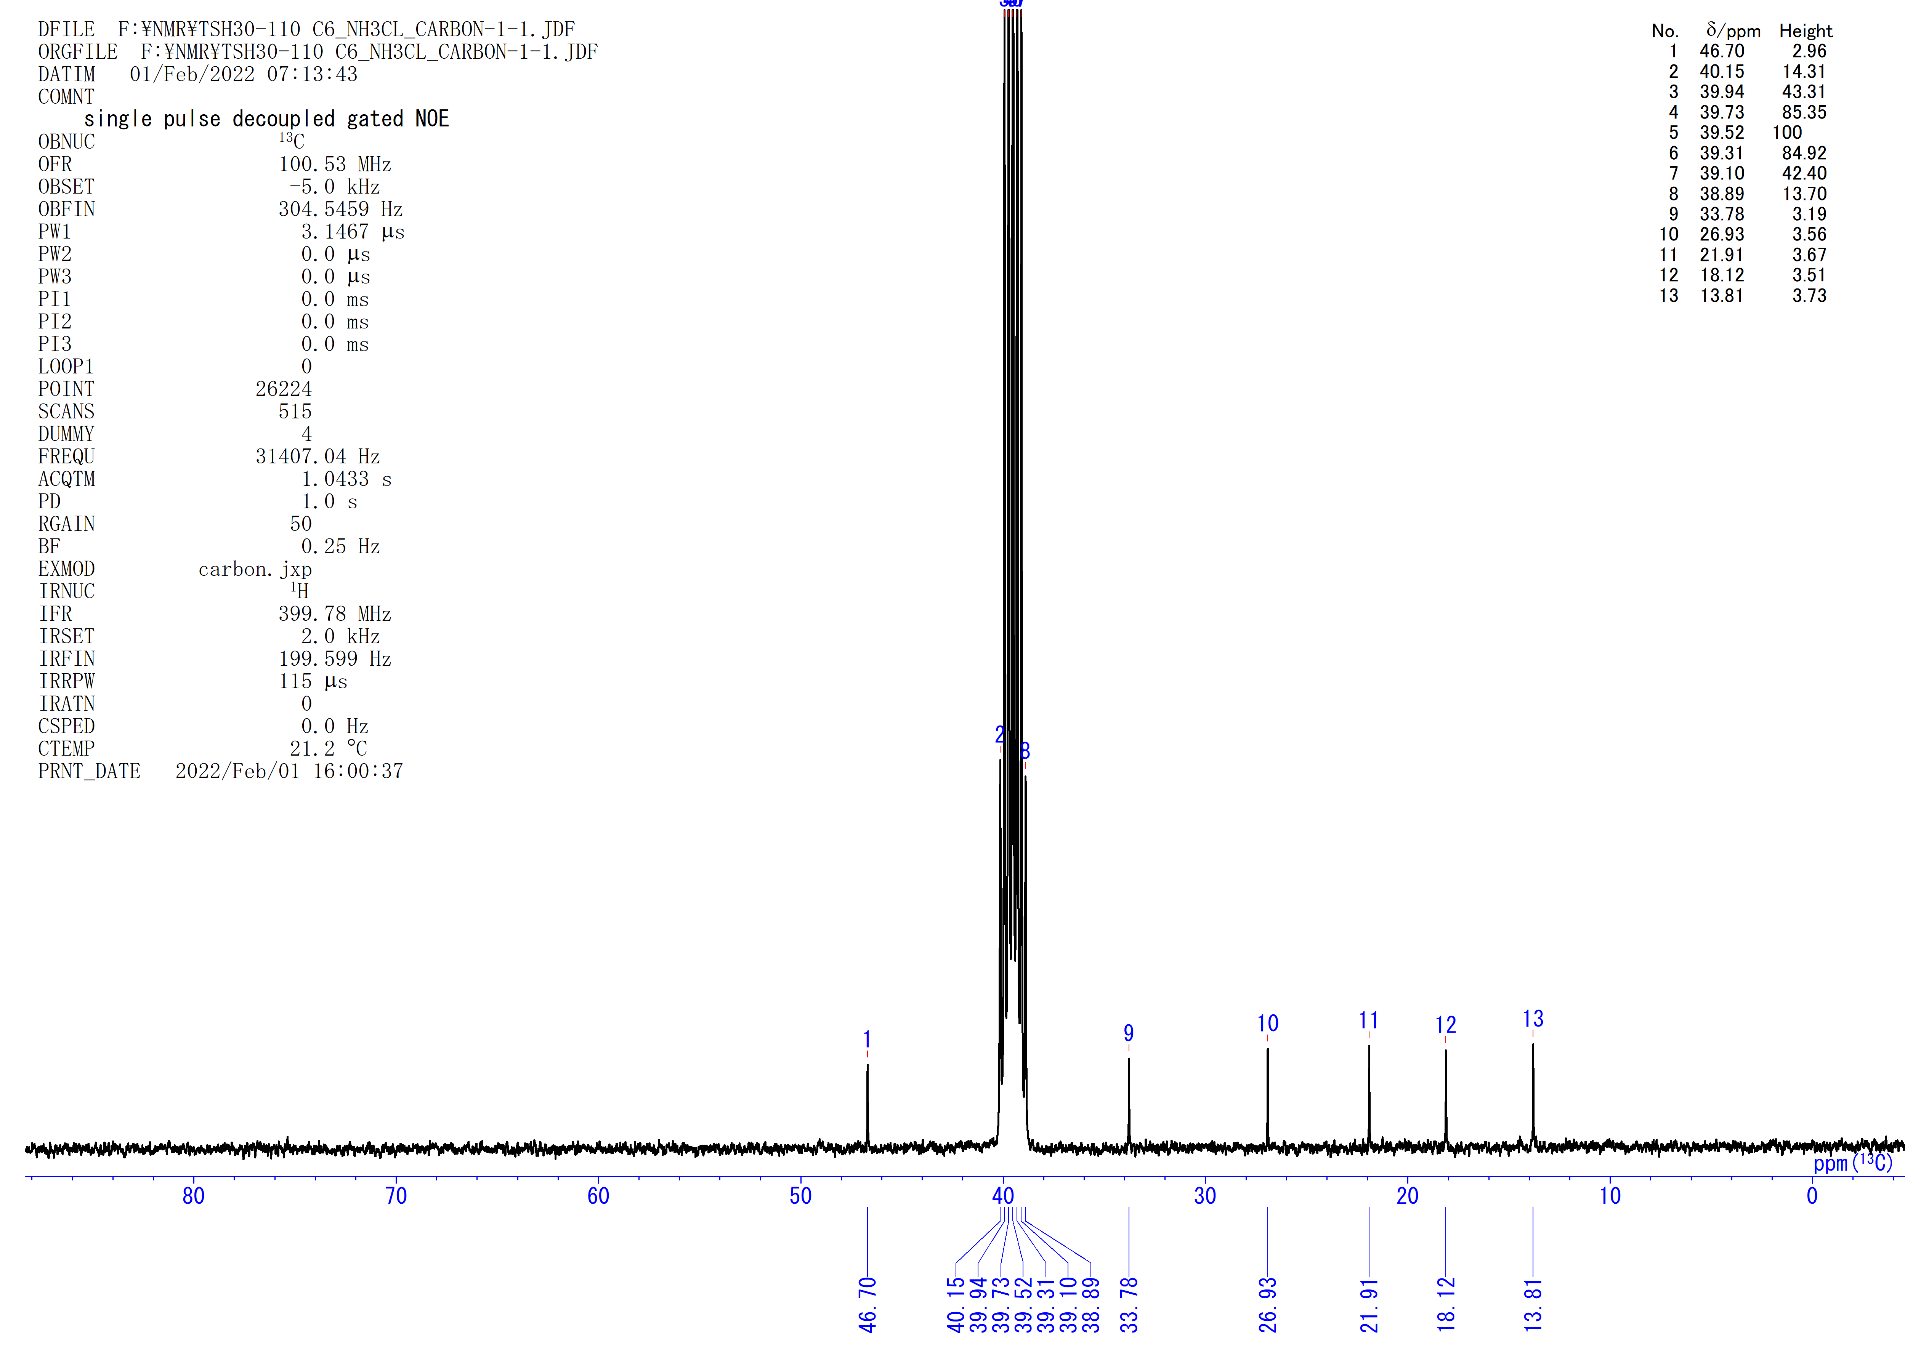


**Figure S61.** 13C{1H} NMR spectrum of **7d** (dmso-*d*6, rt).

**Hydrolysis of 8e with H2O**

Degassed H2O (5.0 M in THF, 200 µl, 1.0 mmol) was added to a 3 ml toluene solution of complex **8e** (38 mg, 0.044 mmol) under vigorously stirring at −78 oC. After 2 h at room temperature, the resulting dark-red suspension was separated by a “trap-to-trap” technique. The solid residue was treated with an excess amount of ether solution of HCl (1.0 M in ether, 600 µl). The resulting orange–red solution was evaporated to give (C5Me4SiMe3)TiCl3 (42 mg, 0.12 mmol, 91%). The volatile part obtained in the above “trap-to-trap” separation was treated with HCl (1.0 M in ether, 0.3 ml), which led to immediate formation of mixture of MeCHPhNH3Cl (**7e**, 70% NMR) and NH4Cl (89% NMR) as white solid (7 mg).

**7e**: 1H NMR (dmso-*d*6, rt): *d* 8.60 (brs, 3H, CH3CHPhN*H*3Cl), 7.54-7.36 (5H, Ph overlap with NH4Cl), 4.37 (m, 1H, CH3C*H*PhNH3Cl), 1.52 (d, *J*HH = 6.7 Hz, 3H, C*H*3CHPhNH3Cl). 13C{1H} NMR (dmso-*d*6, rt): *d* 139.5 (s, Ph), 128.6 (s, Ph), 128.3 (s, Ph), 126.9 (s, Ph), 50.0 (s, CH3*C*HPhNH3Cl), 20.8 (s, *C*H3CHPhNH3Cl). EI-MS (*m/z*): Calculated for C8H10N ([M-H]+): 120.0813; Found. *m/z* = 120.0811 ([C6H5-CH(CH3)-NH]+), 106.0655 ([C6H5-CH-NH2]+).


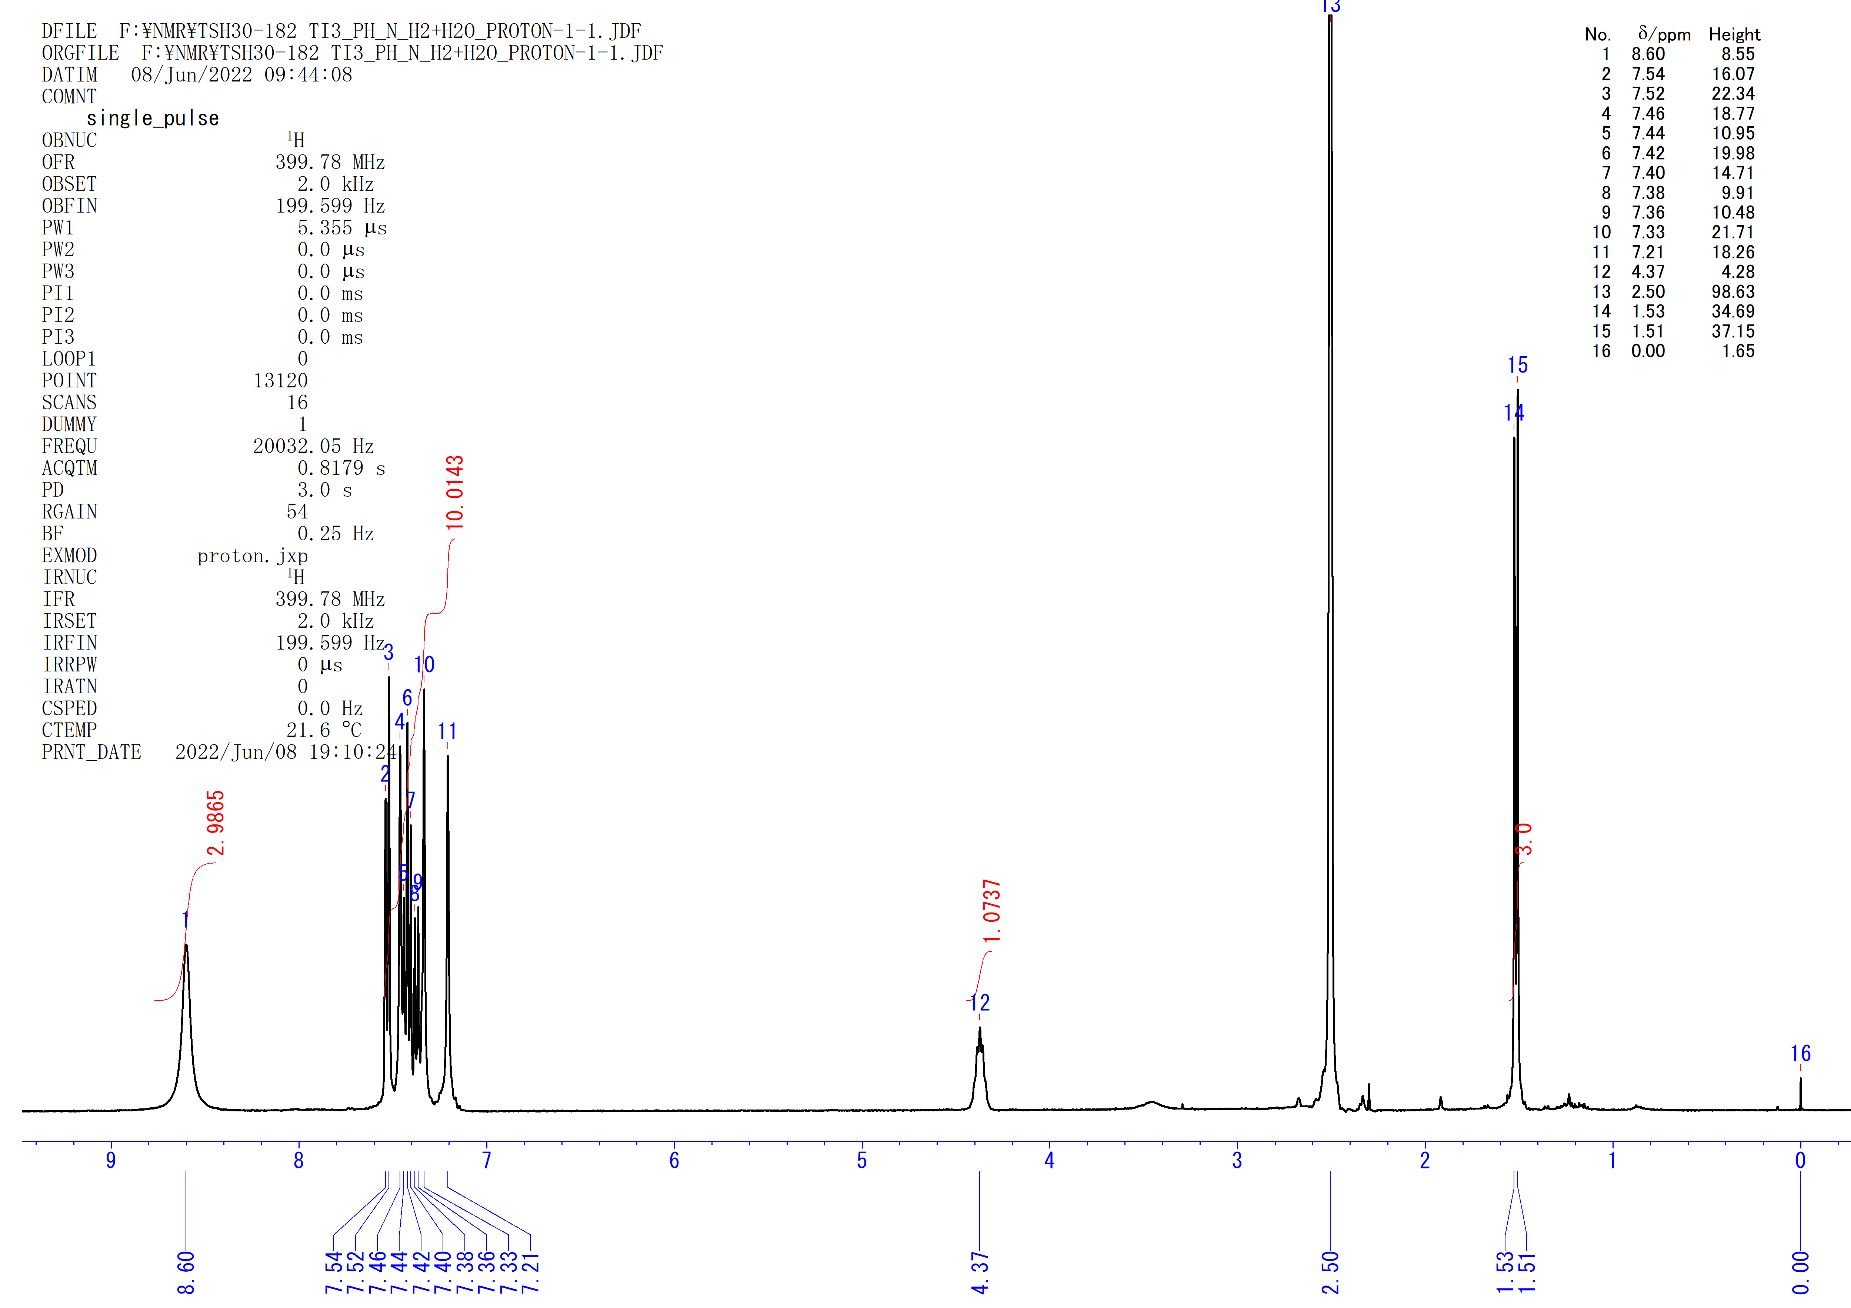


**Figure S62.** 1H NMR spectrum of **7e** and NH4Cl (dmso-*d*6, rt).


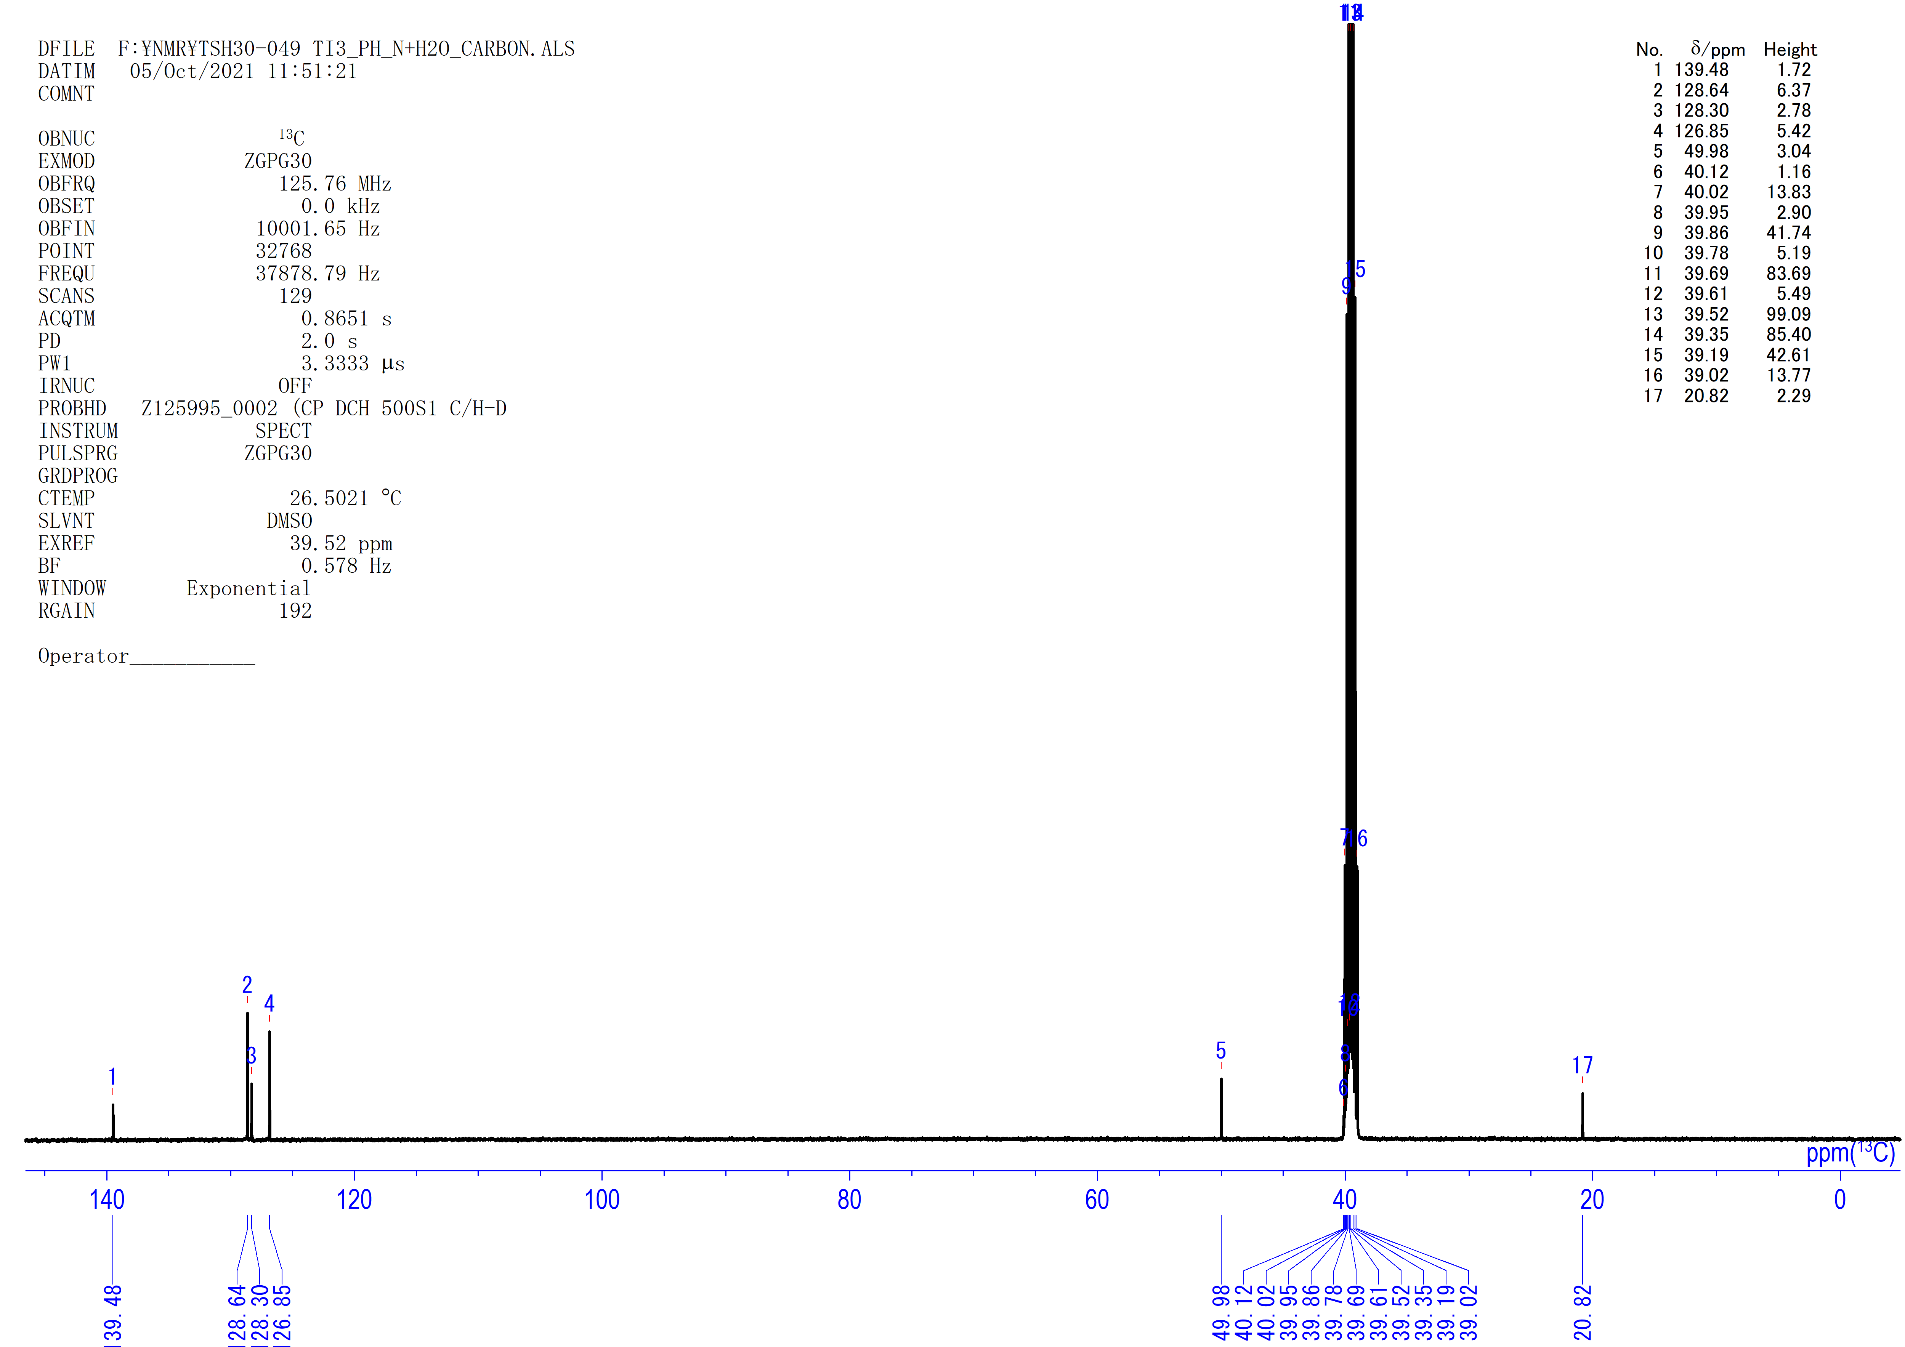


**Figure S63.** 13C{1H} NMR spectrum of **7e** (dmso-*d*6, rt).

**Hydrolysis of 8f with H2O**

Degassed H2O (5.0 M in THF, 0.3 ml, 1.5 mmol) was added to a 3 ml toluene solution of complex **8f** (46 mg, 0.054 mmol) under vigorously stirring at −78 oC. After 2 h at room temperature, the resulting dark-red suspension was separated by a “trap-to-trap” technique. The solid residue was treated with an excess amount of ether solution of HCl (1.0 M in ether, 0.6 ml). The resulting orange–red solution was evaporated to give (C5Me4SiMe3)TiCl3 (50 mg, 0.14 mmol, 90%). The volatile part obtained in the above “trap-to-trap” separation was treated with HCl (1.0 M in ether, 0.5 ml), which led to immediate formation of mixture of C5H9CH(CH3)NH3Cl (**7f**, 61% NMR) and NH4Cl (69% NMR) as white solid (7.0 mg).

**7f**: 1H NMR (dmso-*d*6, rt): *d* 8.06 (brs, 3H, C5H9CH(CH3)N*H*3Cl), 2.95 (m, 1H, C5H9C*H*(CH3)NH3Cl), 1.91 (m, 1H, C5*H*9CH(CH3)NH3Cl), 1.71 (m, 2H, C5*H*9CH(CH3)NH3Cl), 1.54 (m, 2H, C5*H*9CH(CH3)NH3Cl), 1.48 (m, 2H, C5*H*9CH(CH3)NH3Cl), 1.24 (m, 2H, C5*H*9CH(CH3)NH3Cl), 1.17 (d, *J*HH = 6.1 Hz, 3H, C5H9CH(C*H*3)NH3Cl). 13C{1H} NMR (dmso-*d*6, rt): *d* 51.1 (s, C5H9*C*H(CH3)NH3Cl), 43.9 (s, *C*5H9CH(CH3)NH3Cl), 29.2 (s, *C*5H9CH(CH3)NH3Cl), 28.6 (s, *C*5H9CH(CH3)NH3Cl), 24.9 (s, *C*5H9CH(CH3)NH3Cl), 24.8 (s, *C*5H9CH(CH3)NH3Cl), 17.4 (s, C5H9CH(*C*H3)NH3Cl). EI-MS (*m/z*): Calculated for C7H14N ([M-H]+): 112.1126; Found. *m/z* = 112.1128 ([C5H9-CH(CH3)-NH]+), 98.0968 ([C5H9-CH-NH2]+), 44.04981 ([CH3-CH-NH2]+).

**
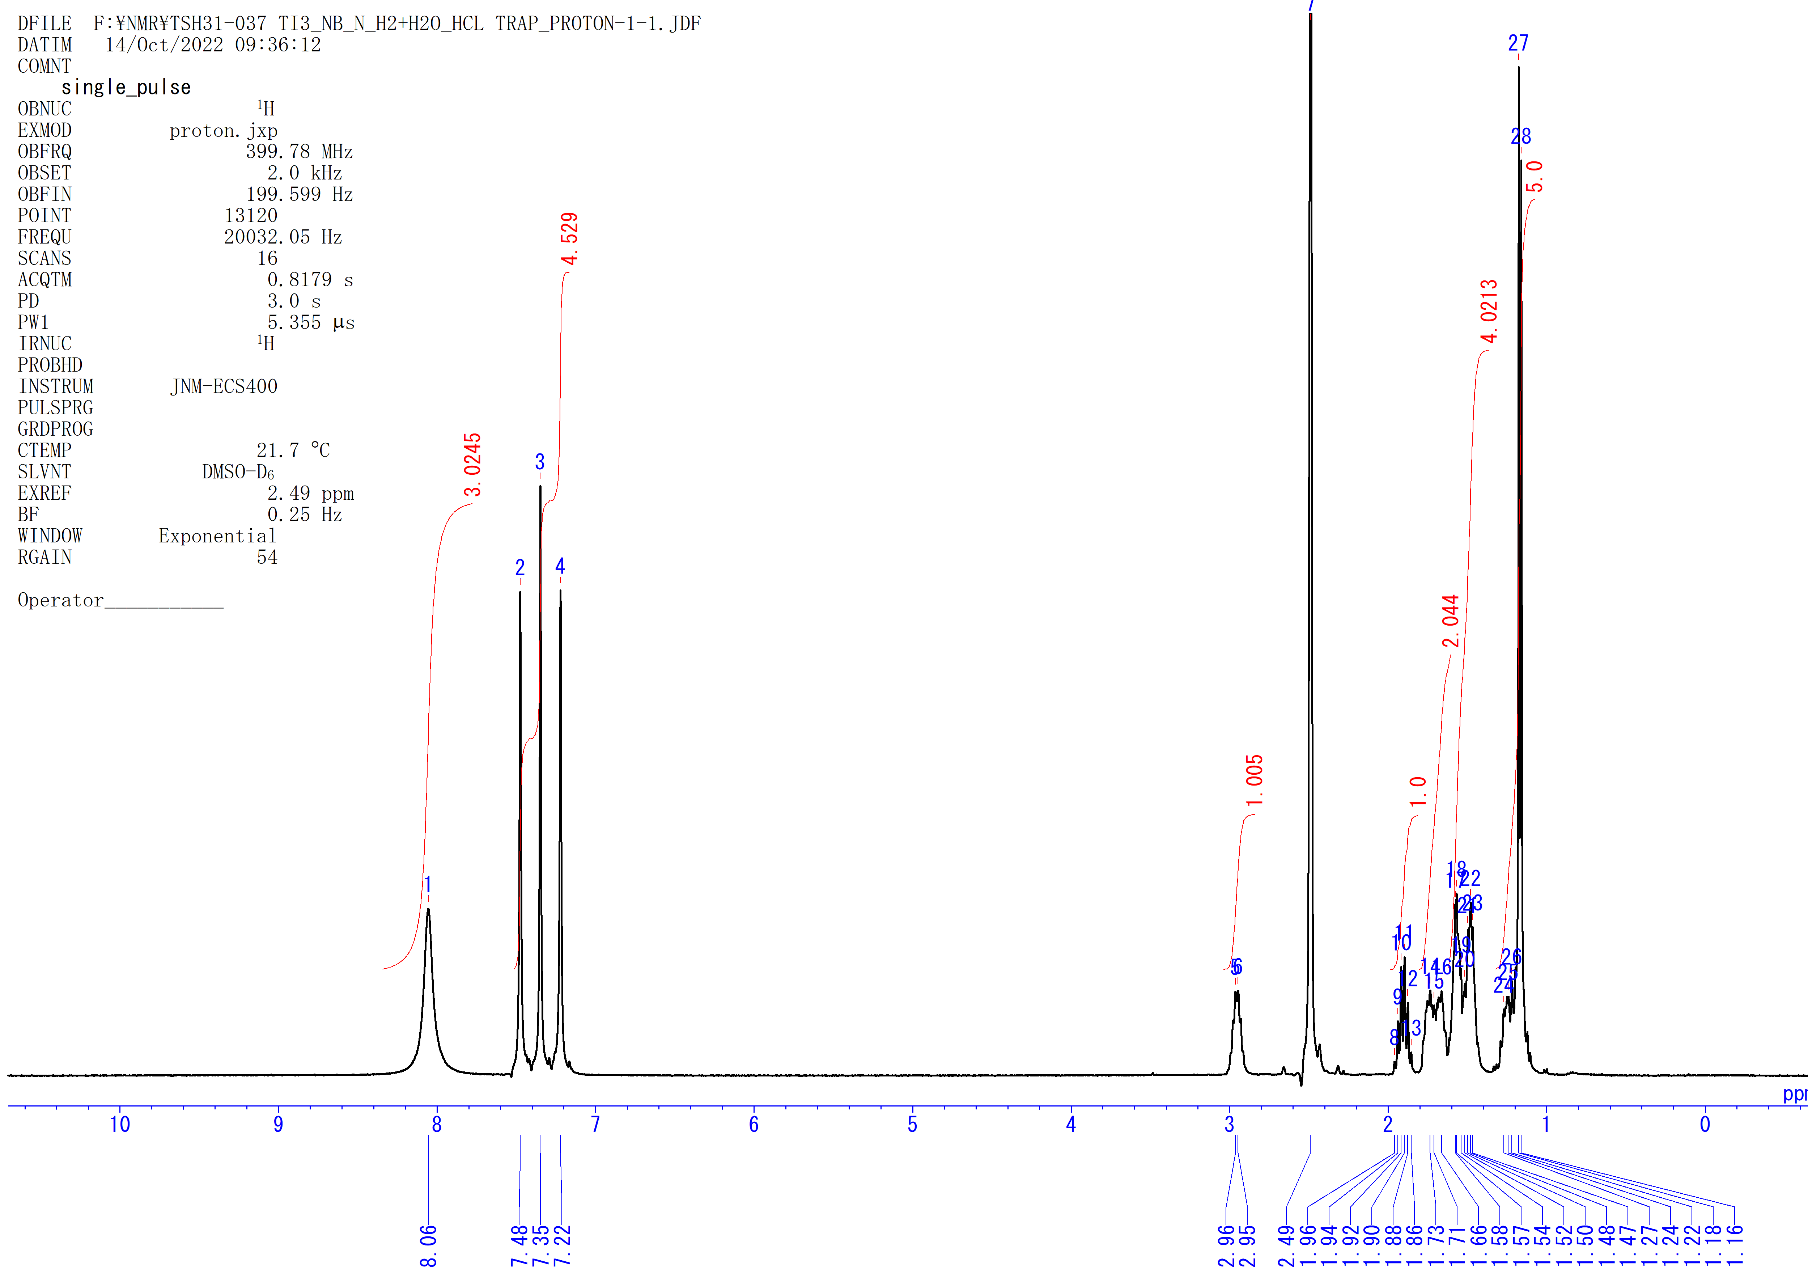
**

**Figure S64.** 1H NMR spectrum of **7f** and NH4Cl (dmso-*d*6, rt).


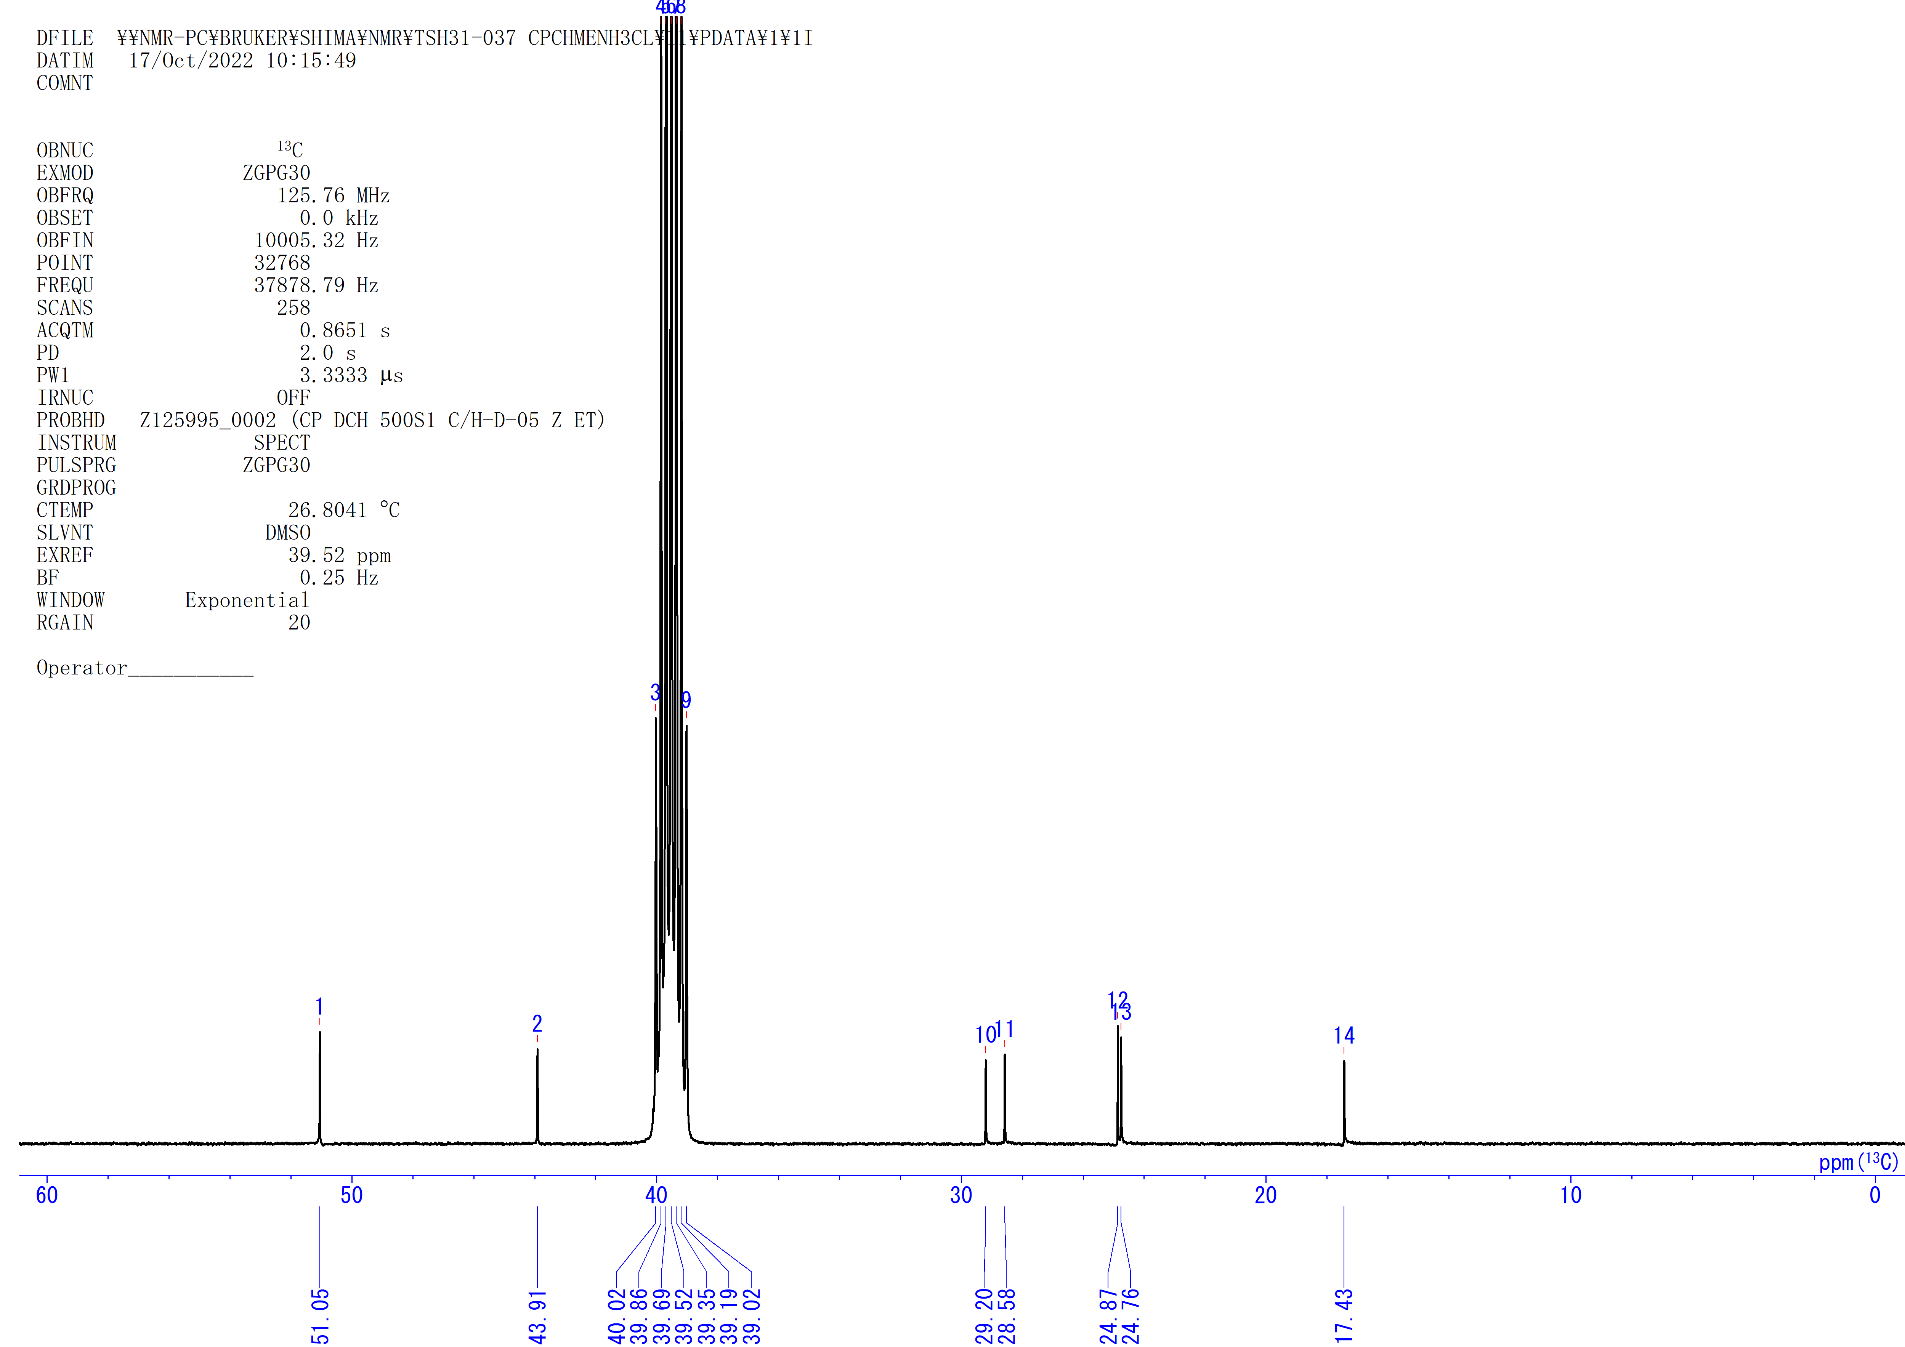


**Figure S65.** 13C{1H} NMR spectrum of **7f** (dmso-*d*6, rt).

**Hydrolysis of 8g with H2O**

Degassed H2O (5.0 M in THF, 0.3 ml, 1.5 mmol) was added to a 3 ml toluene solution of complex **8g** (39 mg, 0.047 mmol) under vigorously stirring at −78 oC. After 2 h at room temperature, the resulting dark-red suspension was separated by a “trap-to-trap” technique. The solid residue was treated with an excess amount of ether solution of HCl (1.0 M in ether, 0.6 ml). The resulting orange–red solution was evaporated to give (C5Me4SiMe3)TiCl3 (45 mg, 0.13 mmol, 92%). The volatile part obtained in the above “trap-to-trap” separation was treated with HCl (1.0 M in ether, 0.5 ml), which led to immediate formation of mixture of C6H11NH3Cl (**7g**, 81% NMR) and NH4Cl (72% NMR) as white solid (7.0 mg).

**7g**: 1H NMR (dmso-*d*6, rt): *d* 8.09 (brs, 3H, C6H11N*H*3Cl), 2.91 (m, 1H, C6*H*11NH3Cl), 1.90 (m, 2H, C6*H*11NH3Cl), 1.71 (m, 2H, C6*H*11NH3Cl), 1.56 (m, 1H, C6*H*11NH3Cl), 1.25 (m, 4H, C6*H*11NH3Cl), 1.09 (m, 1H, C6*H*11NH3Cl). 13C{1H} NMR (dmso-*d*6, rt): *d* 49.2 (s, *C*5H11NH3Cl), 30.3 (s, *C*5H11NH3Cl), 24.6 (s, *C*5H11NH3Cl), 23.7 (s, *C*5H11NH3Cl). EI-MS (*m/z*): Calculated for C6H13N ([M]+): 99.1048; Found. 99.1047.


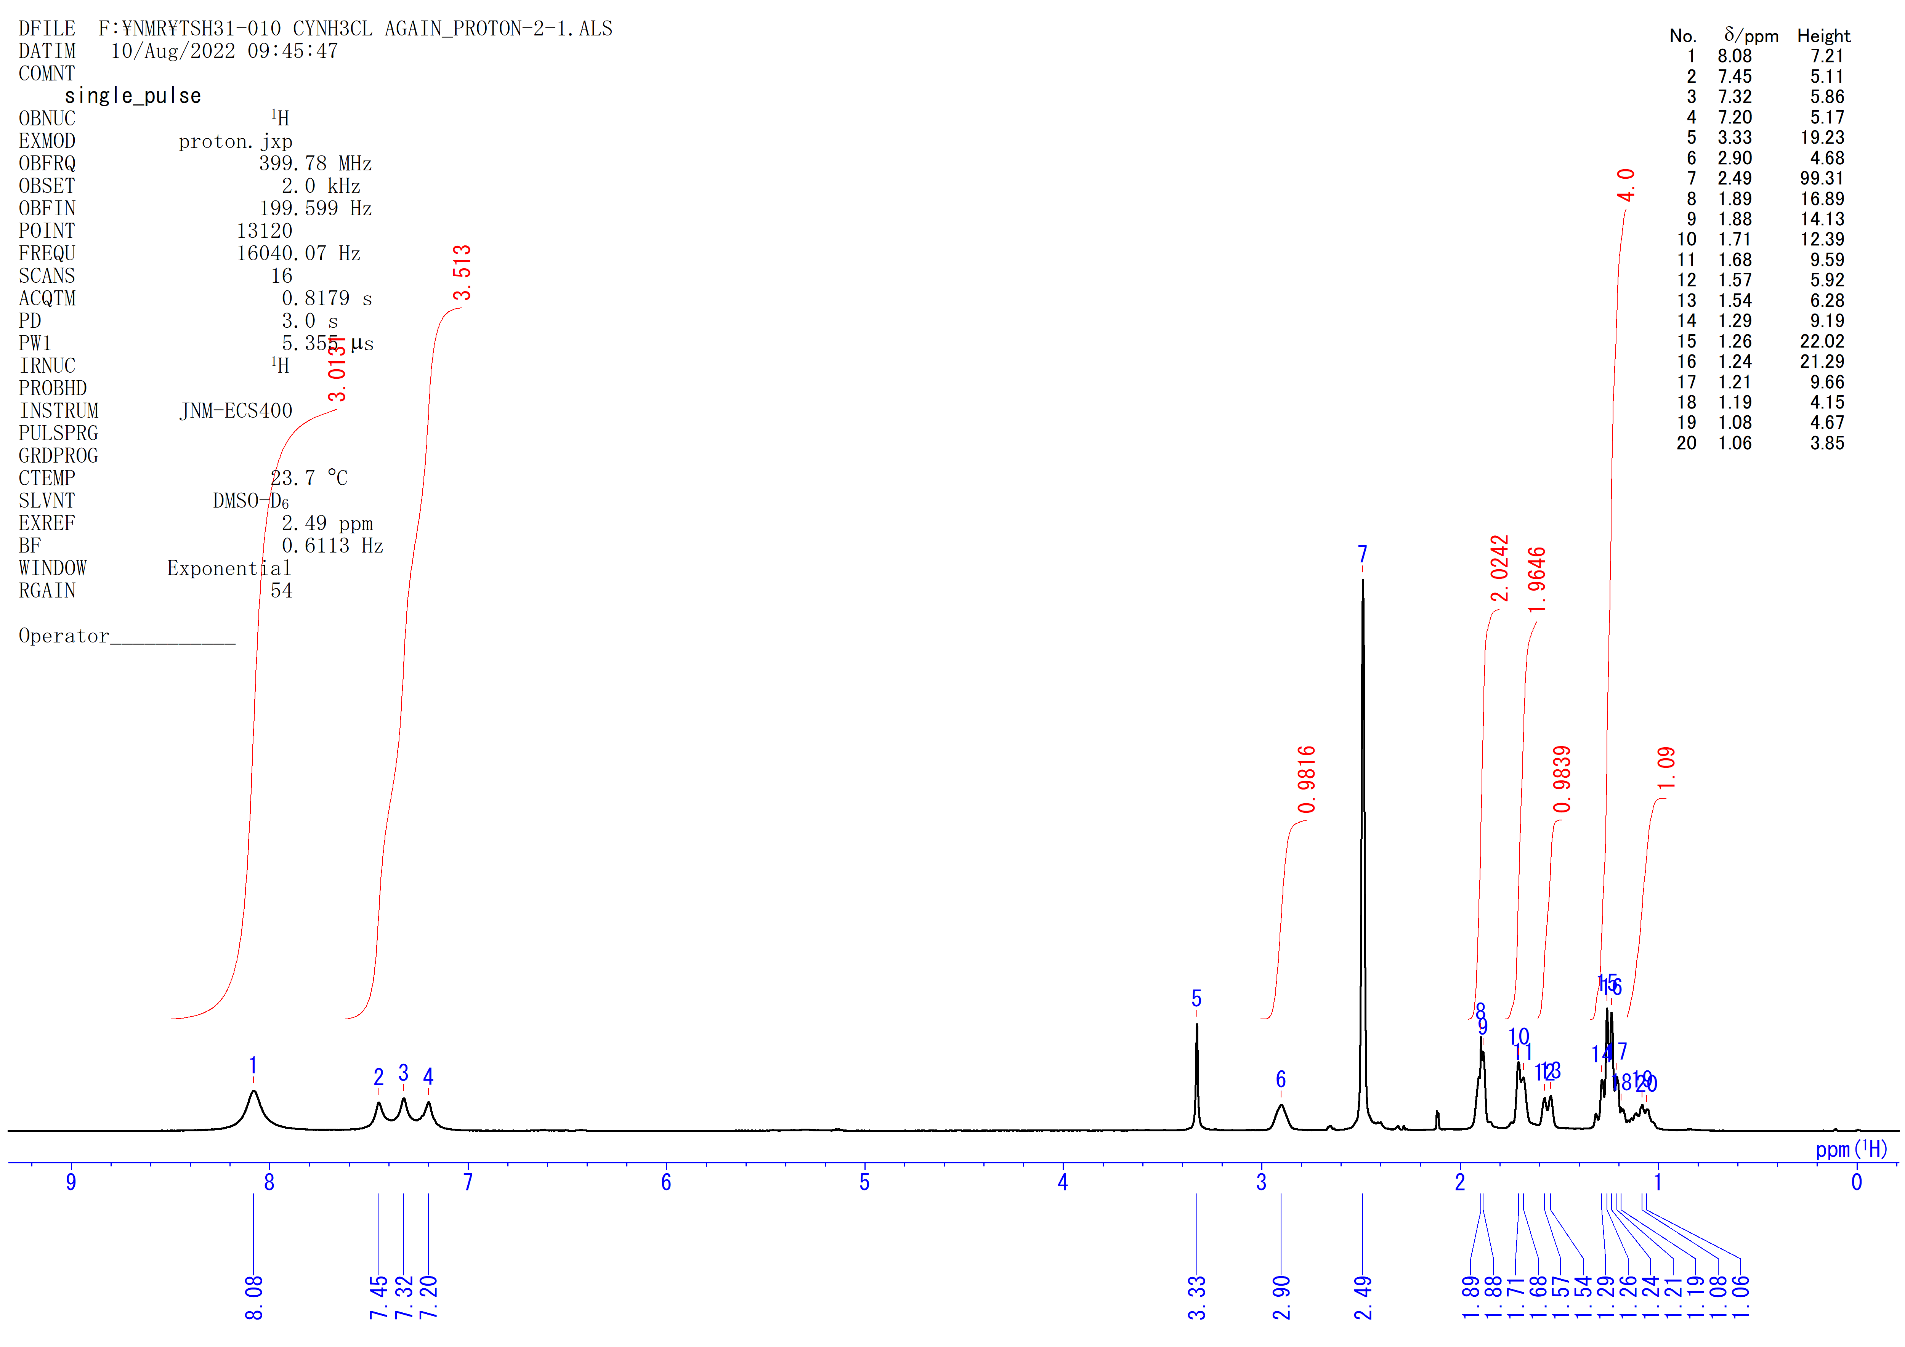


**Figure S66.** 1H NMR spectrum of **7g** and NH4Cl (dmso-*d*6, rt).


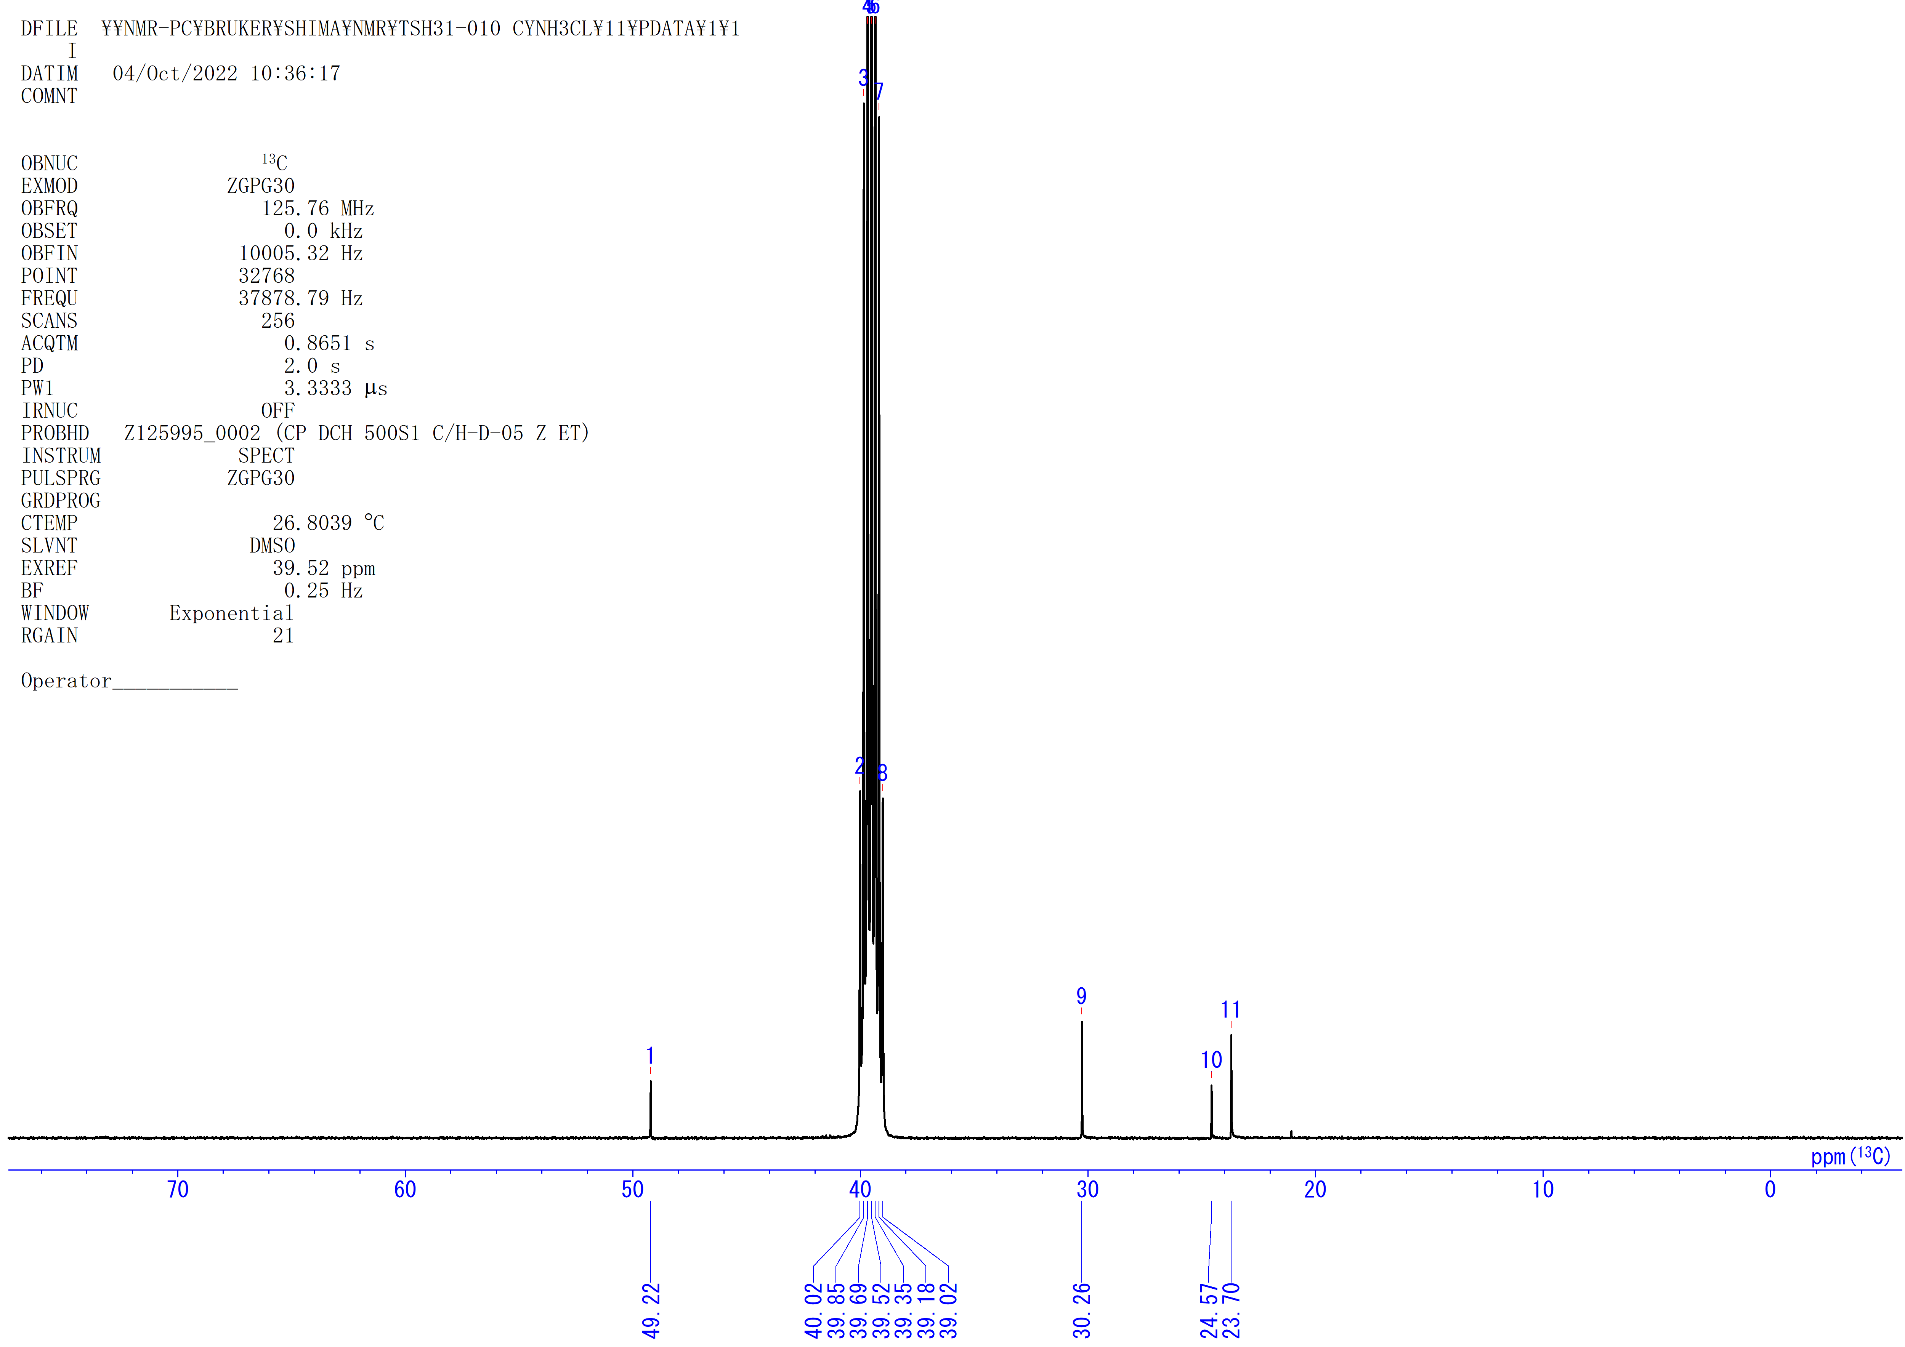


**Figure S67.** 13C{1H} NMR spectrum of **7g** (dmso-*d*6, rt).

**General procedure for kinetic studies of the reaction of 4a with N2.** In a typical experiment, a 5-mm pressure NMR tube (Wilmad Lab Glass) was charged with **4a** (5 mg, 0.0065 mmol) and C6D6 (0.40 ml, 16 mM) in a glovebox. The solution was degassed under vacuum. High pressure N2 gas (5 atm) was then introduced to the NMR tube. After vigorously shaking at room temperature, **4a** was quantitatively converted to **6**. The sample was heated at various temperatures and analyzed by using an NMR spectrometer. The relative concentration was calculated based on the integration of the resonances of the C5Me4Si*Me*3 groups in the C5Me4SiMe3 ligands.


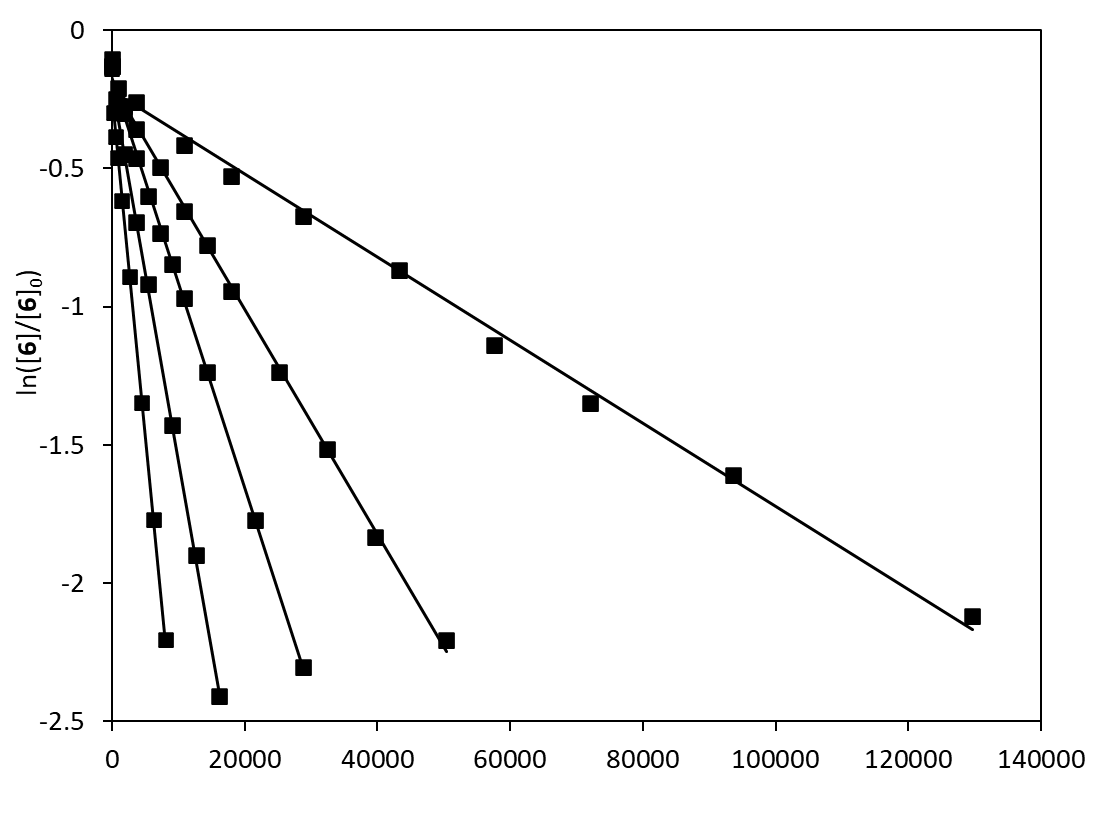


Time (s)

**Figure S68.** First-order plots of the disappearance of **6** as a function of time (s) at different temperature.

**Table S1.** Observed rate constants (*k*obs) for the conversion of **6** to **5**.

| Temperature ⁰C (K) | *k*obs (s-1) |
| --- | --- |
| 22 ⁰C (295 K) | 1.50448×10-5 |
| 30 ⁰C (303 K) | 4.07468×10-5 |
| 35 ⁰C (308K) | 7.44581×10-5 |
| 40 ⁰C (313 K) | 1.36892×10-4 |
| 45 ⁰C (318 K) | 2.47584×10-4 |

**Figure S69.** Eyring plot of the conversion of **6**.

The activation parameters for the reaction of **4a** with N2 (5 atm) were determined by measuring rate constants at various temperatures (Figure S52). An Eyring plot (Figure S53) was constructed from these data (Table S1), and the activation enthalpy and entropy were extracted as follows: *ΔH*≠ = 22.0(2) kcal/mol, *ΔS*≠ = –5.9(7) eu, *ΔG*≠(298K) = 23.7 kcal/mol.

**General procedure for kinetic studies of the conversion of 5 to 3.** 5-mm J-Young NMR tube was charged with **5** (3.0 mg×5, 0.0038×5 mmol) and C6D6 (0.40 ml×5, 0.01 M) in a glovebox. The solution of **5** was heated at various temperatures, and analyzed by using an NMR spectrometer. The relative concentration was calculated based on the integration of the resonances of the C5Me4Si*Me*3 groups in the C5Me4SiMe3 ligands.

**Table S2.** Observed rate constants (*k*obs) for the conversion of **5** to **3**.

| Temperature ⁰C (K) | *k*obs (s-1) |
| --- | --- |
| 60 ⁰C (333 K) | 2.67266×10-5 |
| 65 ⁰C (338 K) | 4.57702×10-5 |
| 70 ⁰C (343 K) | 7.83415×10-5 |
| 75 ⁰C (348 K) | 1.29236×10-4 |
| 80 ⁰C (353 K) | 2.11049×10-4 |
| 65 ⁰C (338 K) | *3.40168×10-5 |

* conversion of **5-*d*** to **3-*d***.


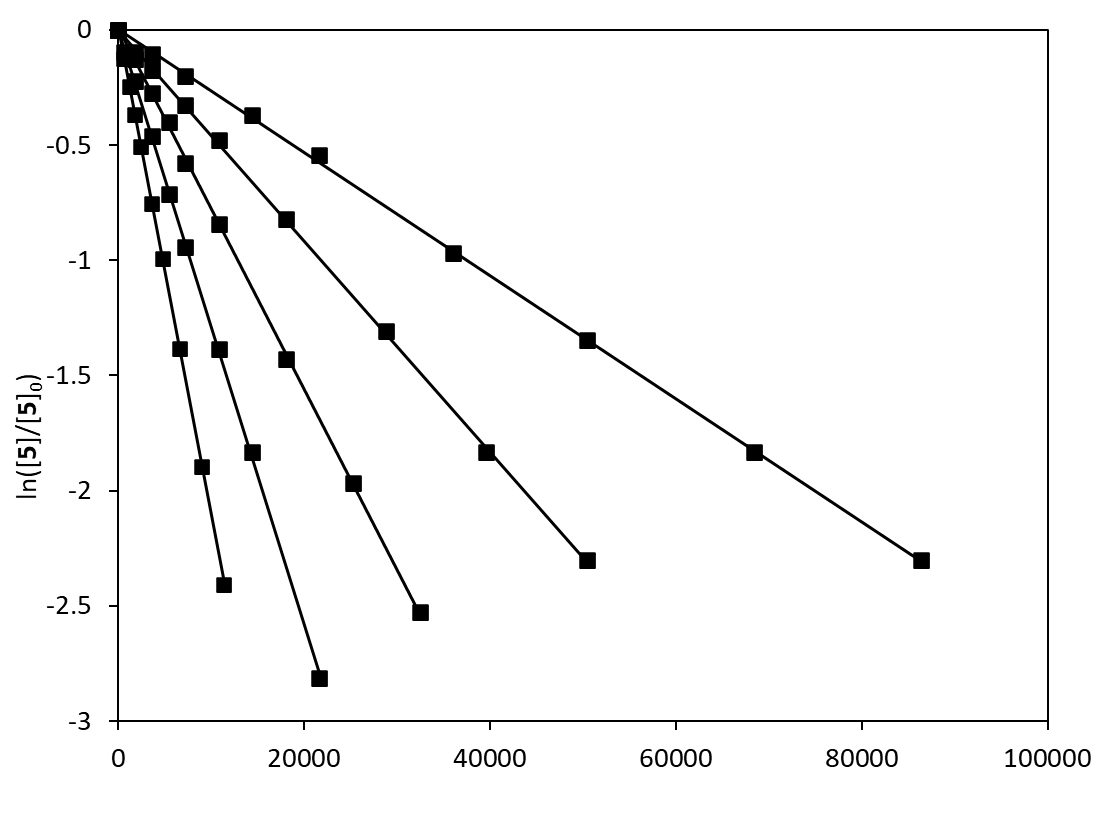


**Figure S70.** First-order plots of the disappearance of **5** as a function of time (s) at different temperature.

**Figure S71.** Eyring plot of the conversion of **5** to **3**.

The activation parameters for the conversion of **5** to **3** were determined by measuring rate constants at various temperatures (Figure S54). An Eyring plot (Figure S55) was constructed from these data (Table S1), and the activation enthalpy and entropy were extracted as follows: *ΔH*≠ = 23.4(1) kcal/mol, *ΔS*≠ = –9.2(3) eu, *ΔG*≠(298K) = 24.1 kcal/mol.

**Figure S72.** Formal synthetic cycle for transformation of alkenes and N2 into alkyl amines mediated by titanium complexes.

**X-ray Crystallographic Studies.** Crystals for X-ray analysis were obtained as described in the preparations. The crystals were manipulated in the glovebox under a microscope in the glovebox, and were mounted on nylon cryoloops with polybutenes (Mn ~920, Aldrich). Data collection were performed at –100 °C on Bruker D8 QUEST diffractrometer with CMOS area detector, using an IμS (Incoatec Microfocus Source) microfocus sealed tube with Mo-K radiation ( = 0.71073 Å). The Bravais lattice and the unit cell parameters were determined by the Bruker APEX3 software package.[[4]](#endnote-4) The raw frame data were processed, and absorption corrections were done using SAINT4 and SADABS4 embedded in Bruker APEX3 to yield the reflection data (hkl) file. All of the structures were solved using SHELXL-2018.[[5]](#endnote-5) Structural refinement was performed using Olex2 systems,[[6]](#endnote-6) on F2 anisotropically for all of the non-hydrogen atoms by the full matrix least-squares method. Analytical scattering factors for neutral atoms were used throughout the analysis. The hydrogen atoms of the Cp′ ligands were placed at the calculated positions, which were refined using a riding model. Other hydrogen atoms could be located on difference Fourier maps and refined isotropically. Disorder at the C1, C1A, C1B, and N1, N1A, N1B, and C13, C14, C15, C13A, C14A, C15A, and C25, C26, C27, C25A, C26A, C27A, and C37, C38, C39, C37A, C38A, C39A atoms in **3** was refined at 60(C1)%:20(C1A)%:20(C1B)%, 40(N1)%:40(N1A)%:20(N1B)%, 56(C13,C14,C15)%: 44(C13A,C14A,C15A)%, 69(C25,C26,C27)%: 31(C25A,C26A,C27A)%, 50(C37,C38,C39):50(C37A,C38A,C39A)% occupancy. Disorder at the C16, C17, C18, and C16A, C17A, C18A atoms in **4f** was refined at 52(C16,C17,C18) : 48(C16A,C17A,C18A)% occupancy. Disorder at the N1, N1A, N1B, and C1, C2, C3, C4, C5, C6 atoms in **6** was refined at 50(N1) :25(N1A) :25(N1B)%, and 50(C1,C2,C3,C5) :25(C4,C6)% occupancy. The analytical scattering factors for neutral atoms were used throughout the analysis. The residual electron densities were of no chemical significance. Crystal data and analysis results are listed in Table S3.

**Table S3.** X-Ray crystallographic data and structure refinement for **1’**, **3**, **4a**, **4f’**, **4g**, **6**, **8a**, and **8g’**.

|  | **1’** | **3** | **4a** | **4f’** | **4g** | **5** | **6** | **8a** | **8g’** |
| --- | --- | --- | --- | --- | --- | --- | --- | --- | --- |
| CCDC number | 2226119 | 2184614 | 2184610 | 2285950 | 2226120 | 2184611 | 2184612 | 2184613 | 2226121 |
| formula | C45H88Si3Ti3∙C3H7 | C39H67N2Si3Ti3 | C39H70Si3Ti3 | C52H94Si3Ti3 | C42H74Si3Ti3 | C39H68N2Si3Ti3∙C2H5O | C39H68N2Si3Ti3 | C39H72N2Si3Ti3 | C51H94N2Si3Ti3 |
| formula weight | 900.20 | 791.91 | 766.92 | 947.24 | 806.98 | 837.98 | 792.92 | 796.95 | 963.25 |
| crystal system | triclinic | monoclinic | triclinic | triclinic | triclinic | triclinic | monoclinic | triclinic | monoclinic |
| space group | *P-*1 | *P*21/*n* | *P-*1 | *P-*1 | *P-*1 | *P-*1 | *P*21/*n* | *P-*1 | *P*21/*c* |
| a, Å | 11.1673(3) | 11.5470(2) | 10.455(5) | 11.8409(7) | 10.9833(3) | 10.1274(3) | 11.4039(6) | 11.4141(5) | 11.5177(5) |
| b, Å | 11.5091(4) | 19.5979(4) | 11.285(5) | 16.8885(9) | 11.4834(3) | 11.6114(4) | 20.1349(11) | 11.9154(5) | 40.3561(17) |
| c, Å | 21.5001(7) | 19.3634(4) | 19.790(9) | 28.3739(15) | 19.7850(5) | 20.2424(6) | 19.1121(10) | 18.4622(7) | 12.1735(5) |
| , deg | 90.2969(14) |  | 75.297(6) | 88.358(3) | 75.9095(14) | 105.3654(13) |  | 98.606(2) |  |
| , deg | 96.8877(13) | 103.0488(8) | 76.669(7) | 88.355(3) | 76.2416(14) | 91.3155(12) | 90.898(3) | 101.647(2) | 94.793(2) |
| , deg | 96.1696(14) |  | 69.619(6) | 79.765(3) | 71.6674(15) | 92.6611(12) |  | 111.5620(19) |  |
| *V*, Å3 | 2727.02(15) | 4268.73(14) | 2091.0(16) | 5579.9(5) | 2261.96(11) | 2291.27(13) | 4387.9(4) | 2217.00(16) | 5638.6(4) |
| Z | 2 | 4 | 2 | 4 | 2 | 2 | 4 | 2 | 4 |
| Dcalcd, g/cm3 | 1.096 | 1.232 | 1.218 | 1.128 | 1.185 | 1.215 | 1.200 | 1.194 | 1.135 |
| temp, K | 173(2) | 173(2) | 173(2) | 173(2) | 173(2) | 173(2) | 173(2) | 173(2) | 173(2) |
| , mm-1(MoK) | 0.522 | 0.660 | 0.670 | 0.514 | 0.622 | 0.620 | 0.642 | 0.635 | 0.510 |
| 2max | 55.0 | 50.0 | 50.0 | 55.0 | 60.0 | 55.0 | 55.0 | 55.0 | 55.0 |
| reflections collected | 12420 | 28221 | 12004 | 25351 | 16061 | 31944 | 46018 | 24279 | 12916 |
| independent reflections (*R*int) | 10633 (0.0465) | 7545 (0.0234) | 7995 (0.1128) | 20335 (0.0404) | 9908 (0.0568) | 12089 (0.0275) | 10048 (0.0754) | 6701 (0.0483) | 10137 (0.0491) |
| *R*1 (*I* > 2*σ*(*I*)) | 0.0431 | 0.0408 | 0.1076 | 0.0889 | 0.0637 | 0.0483 | 0.1113 | 0.0602 | 0.0798 |
| *wR*2 (*I* > 2*σ*(*I*)) | 0.1132 | 0.0977 | 0.2524 | 0.2173 | 0.1289 | 0.1237 | 0.2730 | 0.1407 | 0.1974 |
| *wR*2 (all data) | 0.1198 | 0.1000 | 0.2707 | 0.2288 | 0.1509 | 0.1303 | 0.2835 | 0.1527 | 0.2093 |
| parameters | 562 | 484 | 440 | 1131 | 505 | 482 | 550 | 450 | 565 |
| GOF | 1.016 | 1.072 | 0.929 | 1.053 | 1.016 | 1.039 | 1.139 | 1.047 | 1.088 |


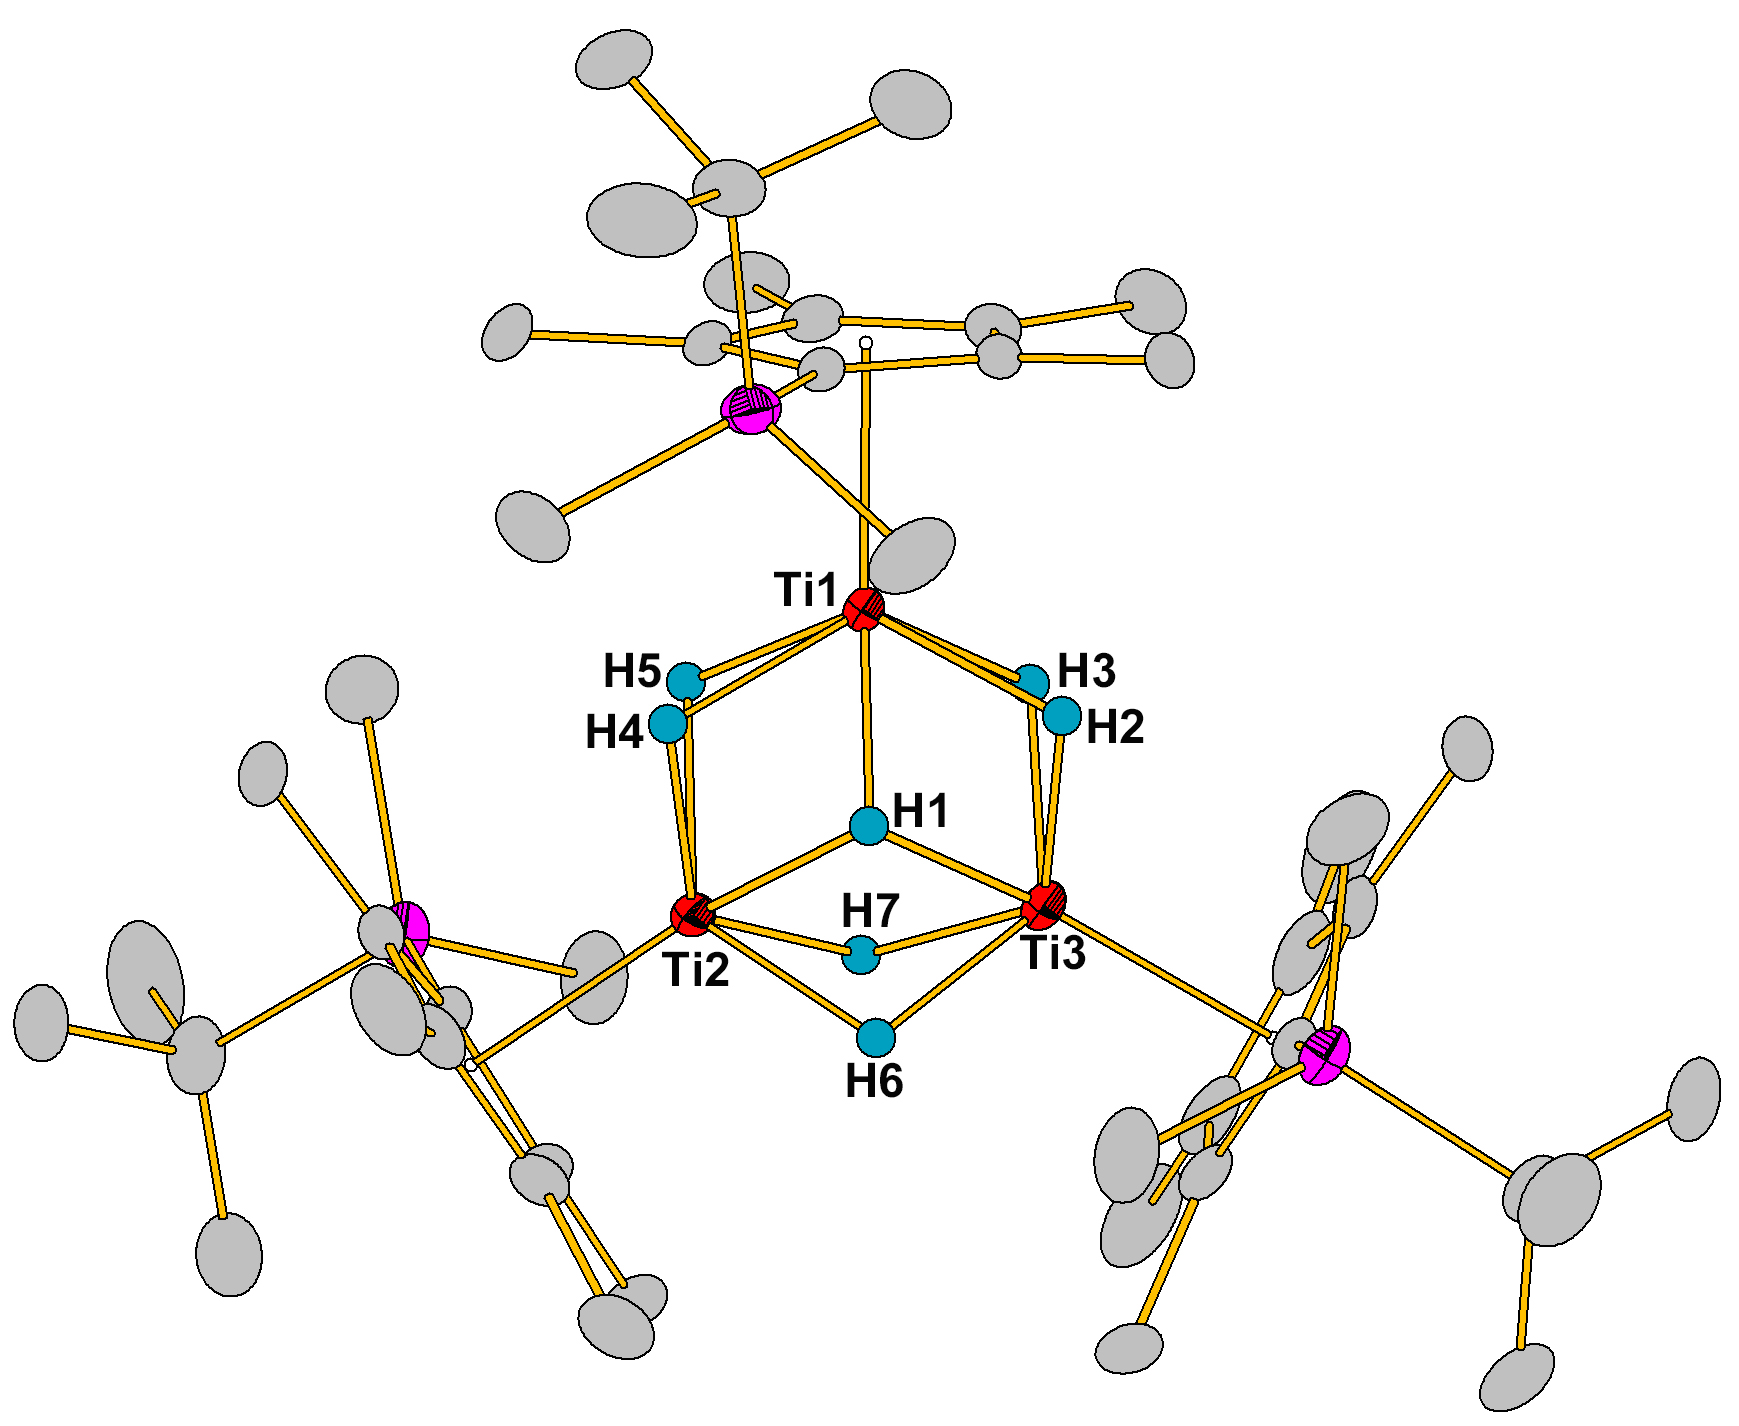


**Figure S73.** ORTEP drawing of the structure of **1’**.

**
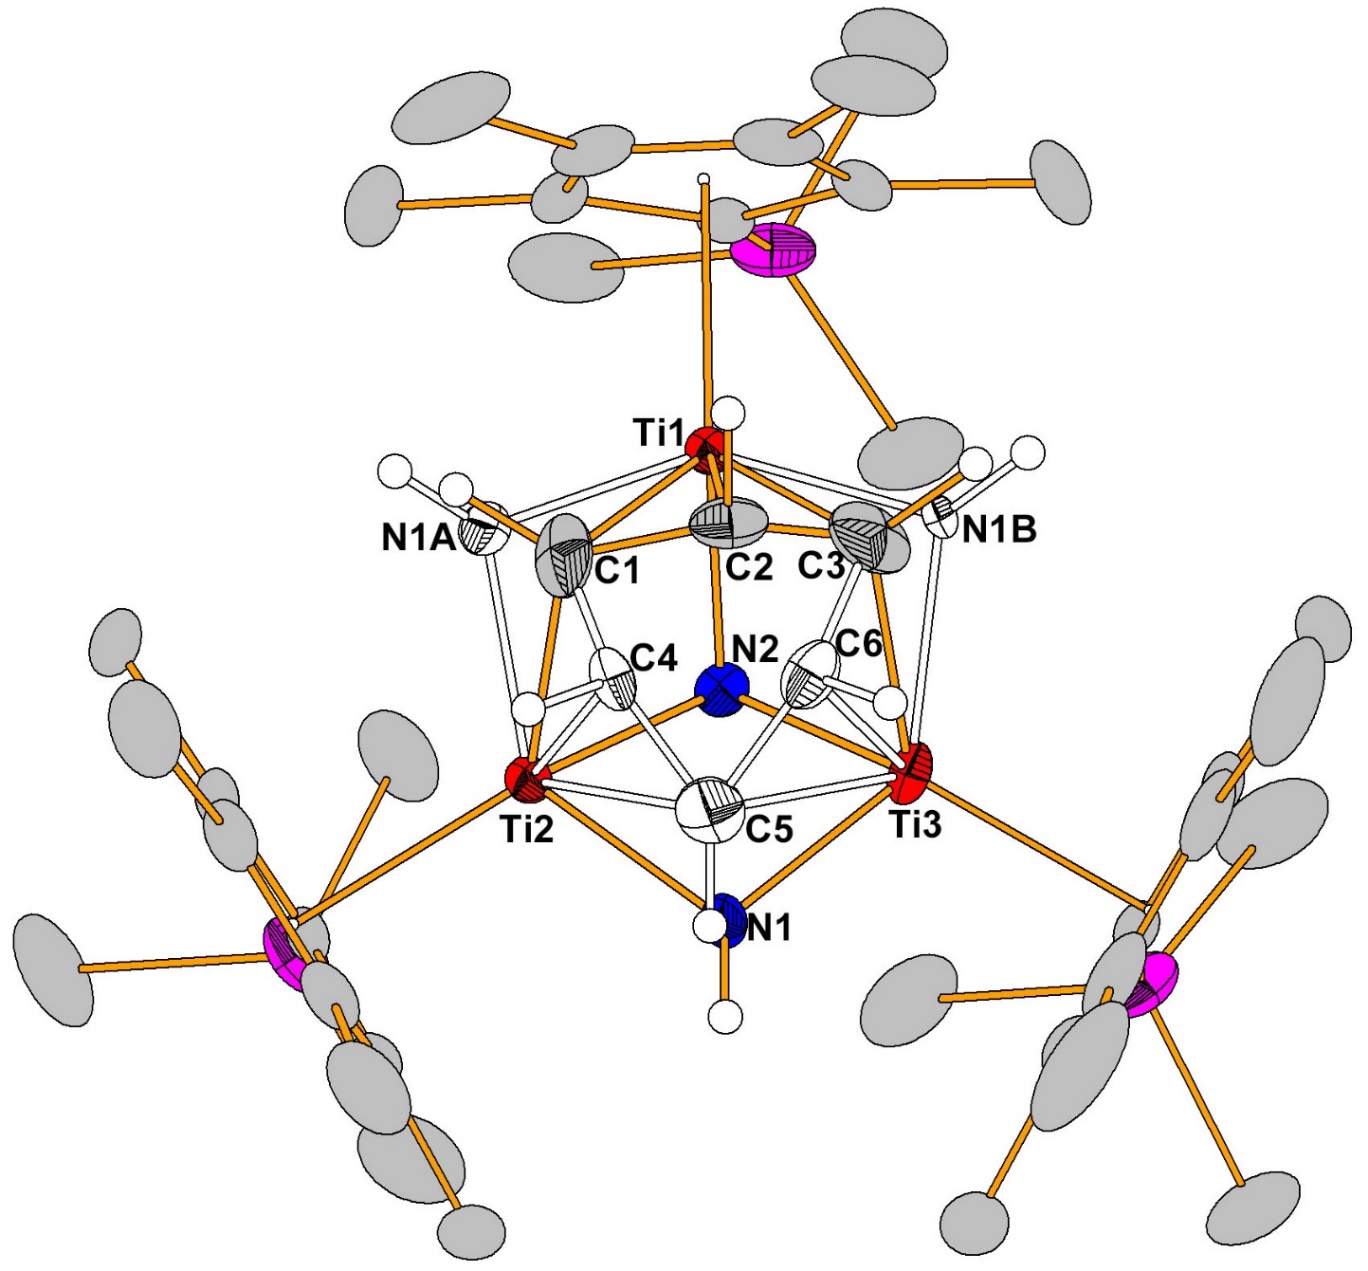
**

**Figure S74.** ORTEP drawing of the structure of **3**. (N1: N1A: N1B = 50: 25: 25%; C1,C2,C3,C5 : C4,C6 = 50: 25%).


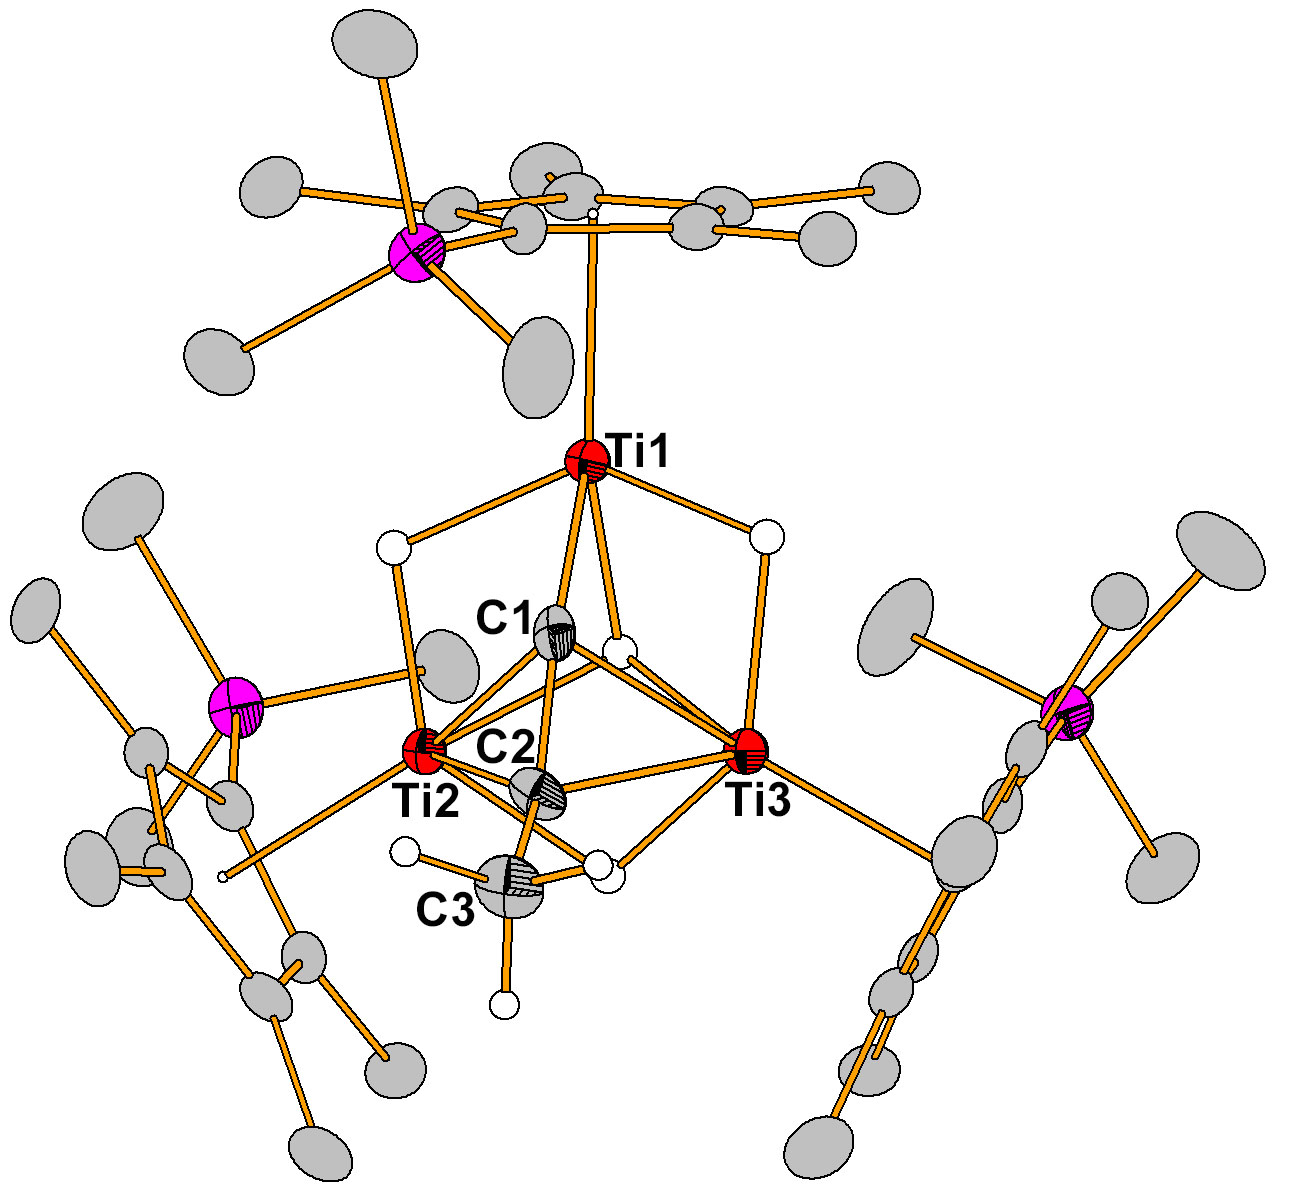


**Figure S75.** ORTEP drawing of the structure of **4a**.

**Figure S76.** ORTEP drawing of the structure of **4f’**.


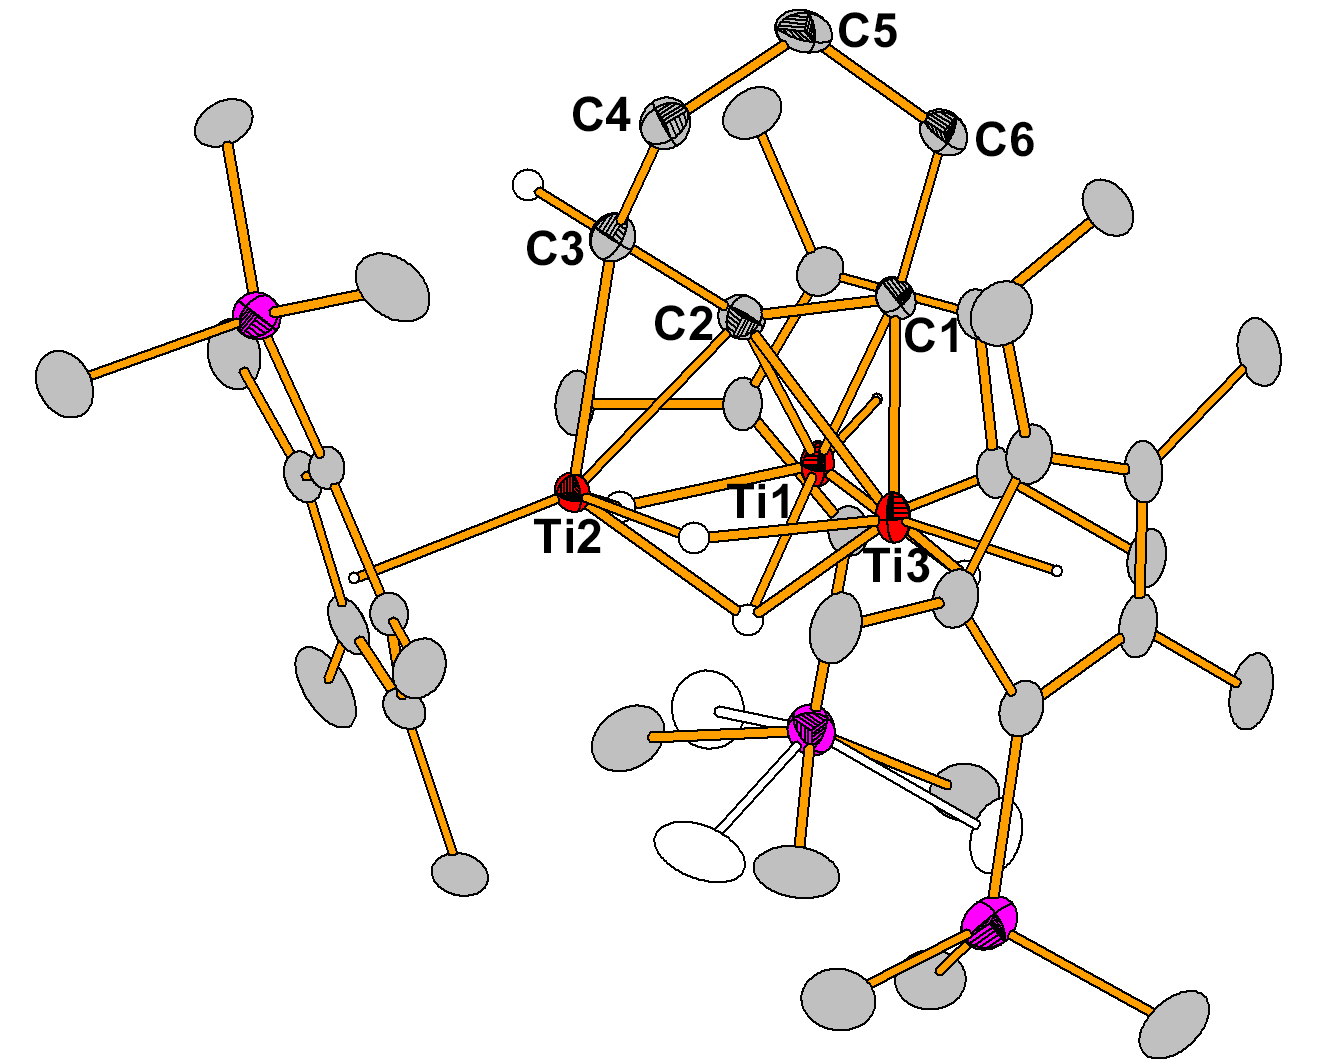


**Figure S77.** ORTEP drawing of the structure of **4g**.

**
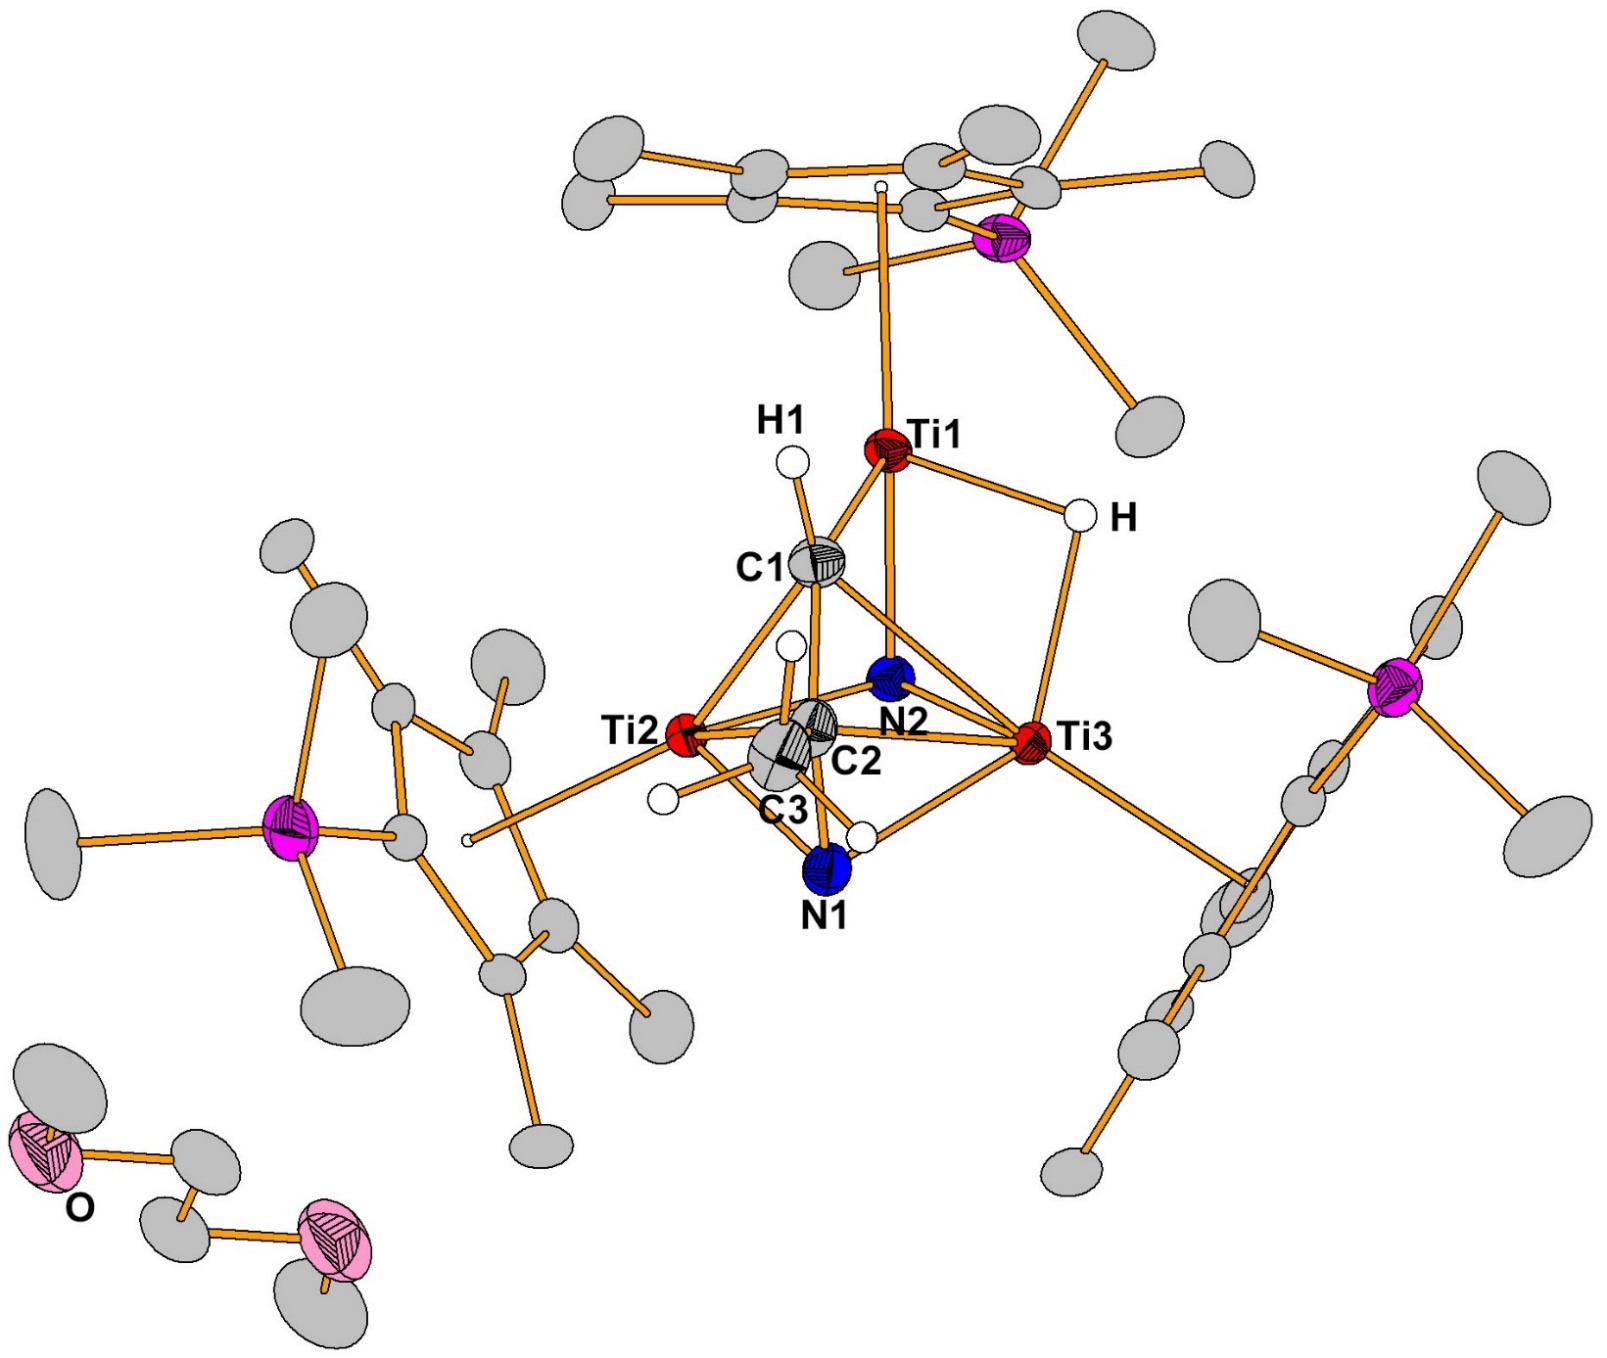
**

**Figure S78.** ORTEP drawing of the structure of **5**.


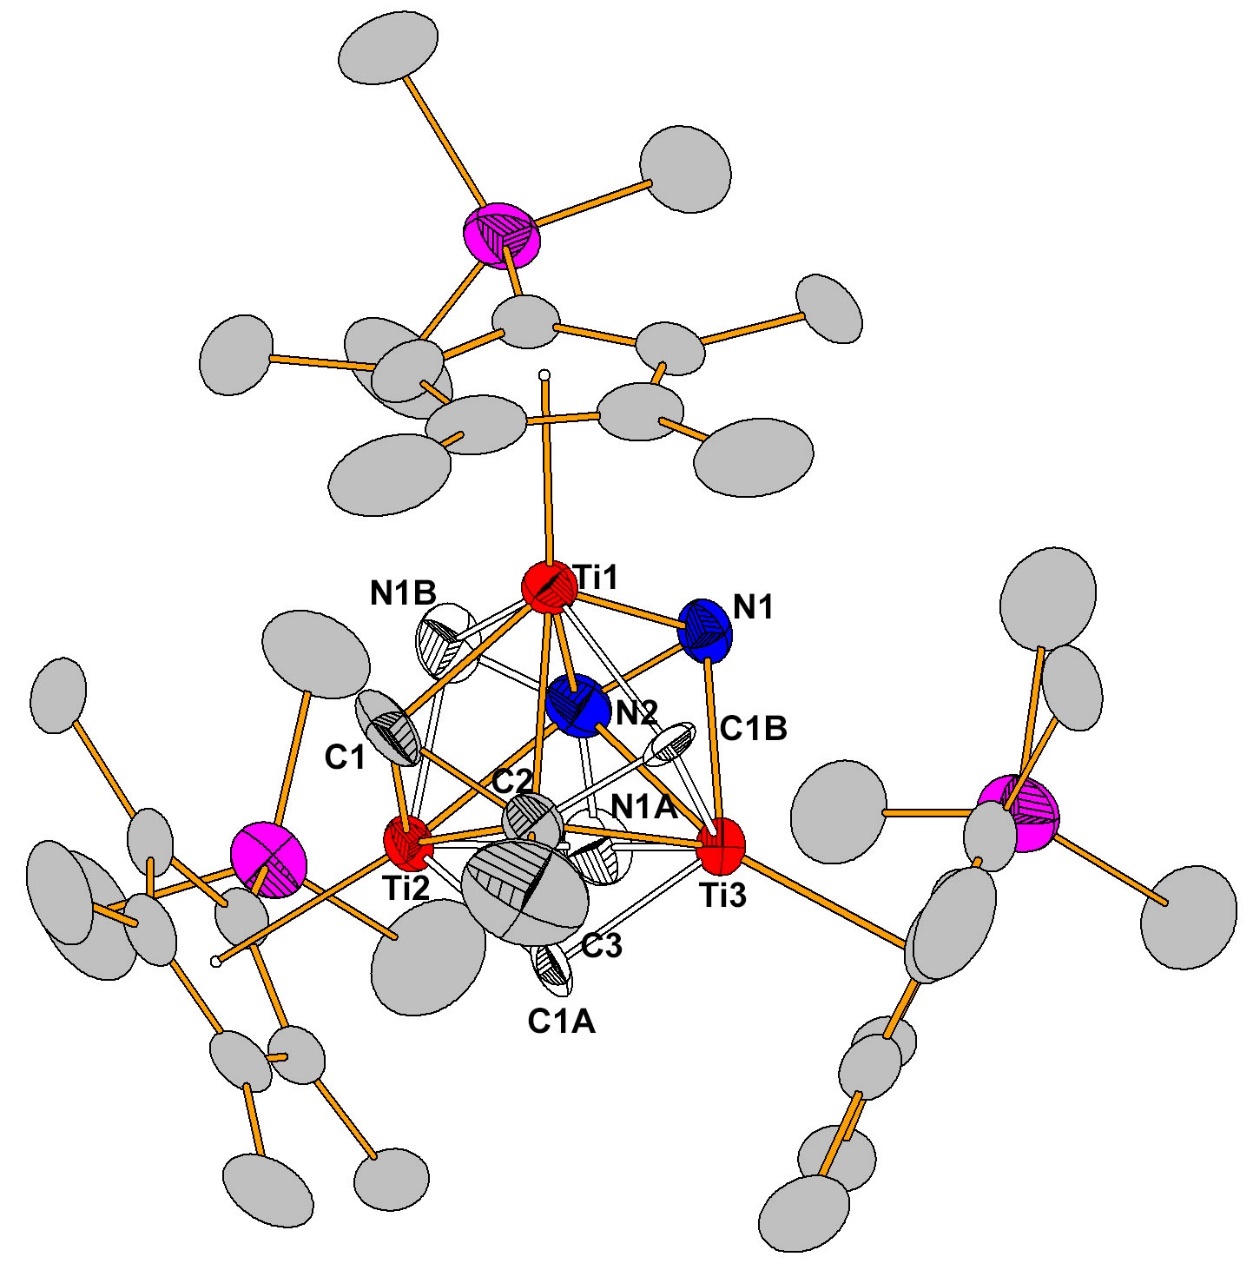


**Figure S79.** ORTEP drawing of the structure of **6**. (C1: C1A: C1B = 60: 20: 20%; N1: N1A: N1B = 40: 40: 20%).


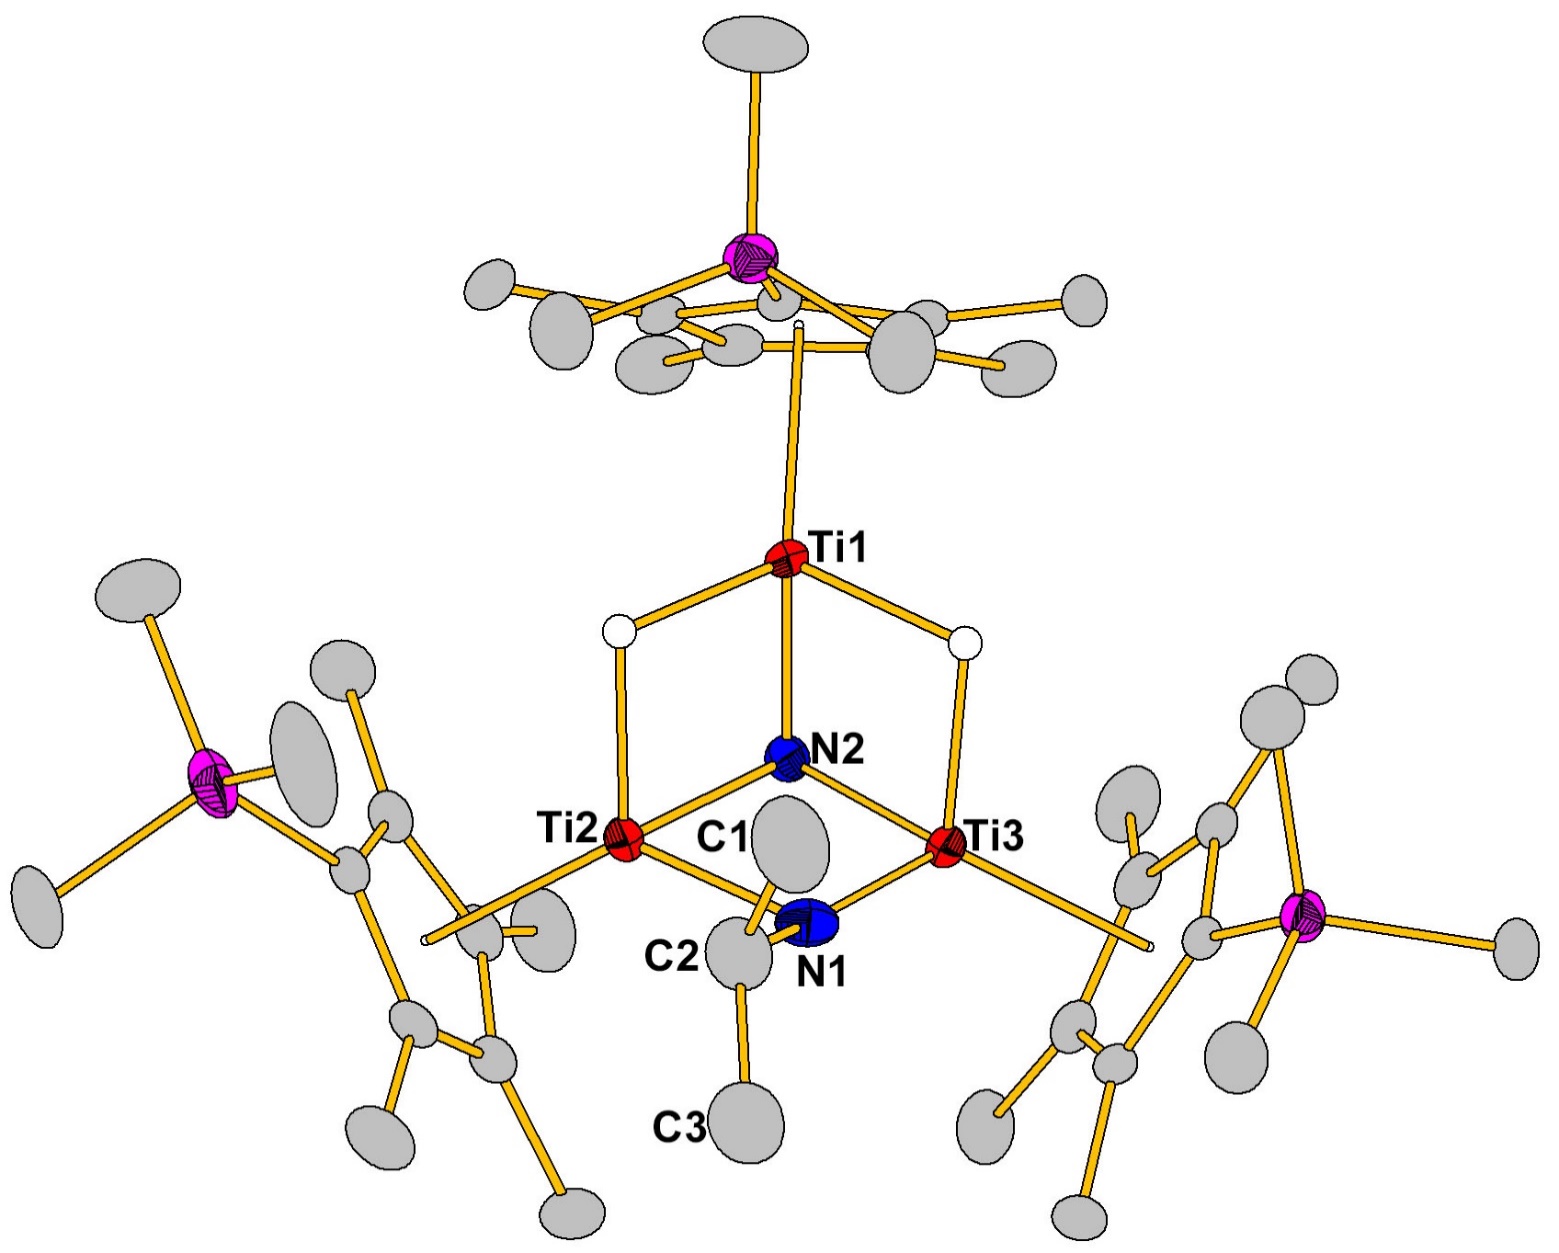


**Figure S80.** ORTEP drawing of the structure of **8a**.


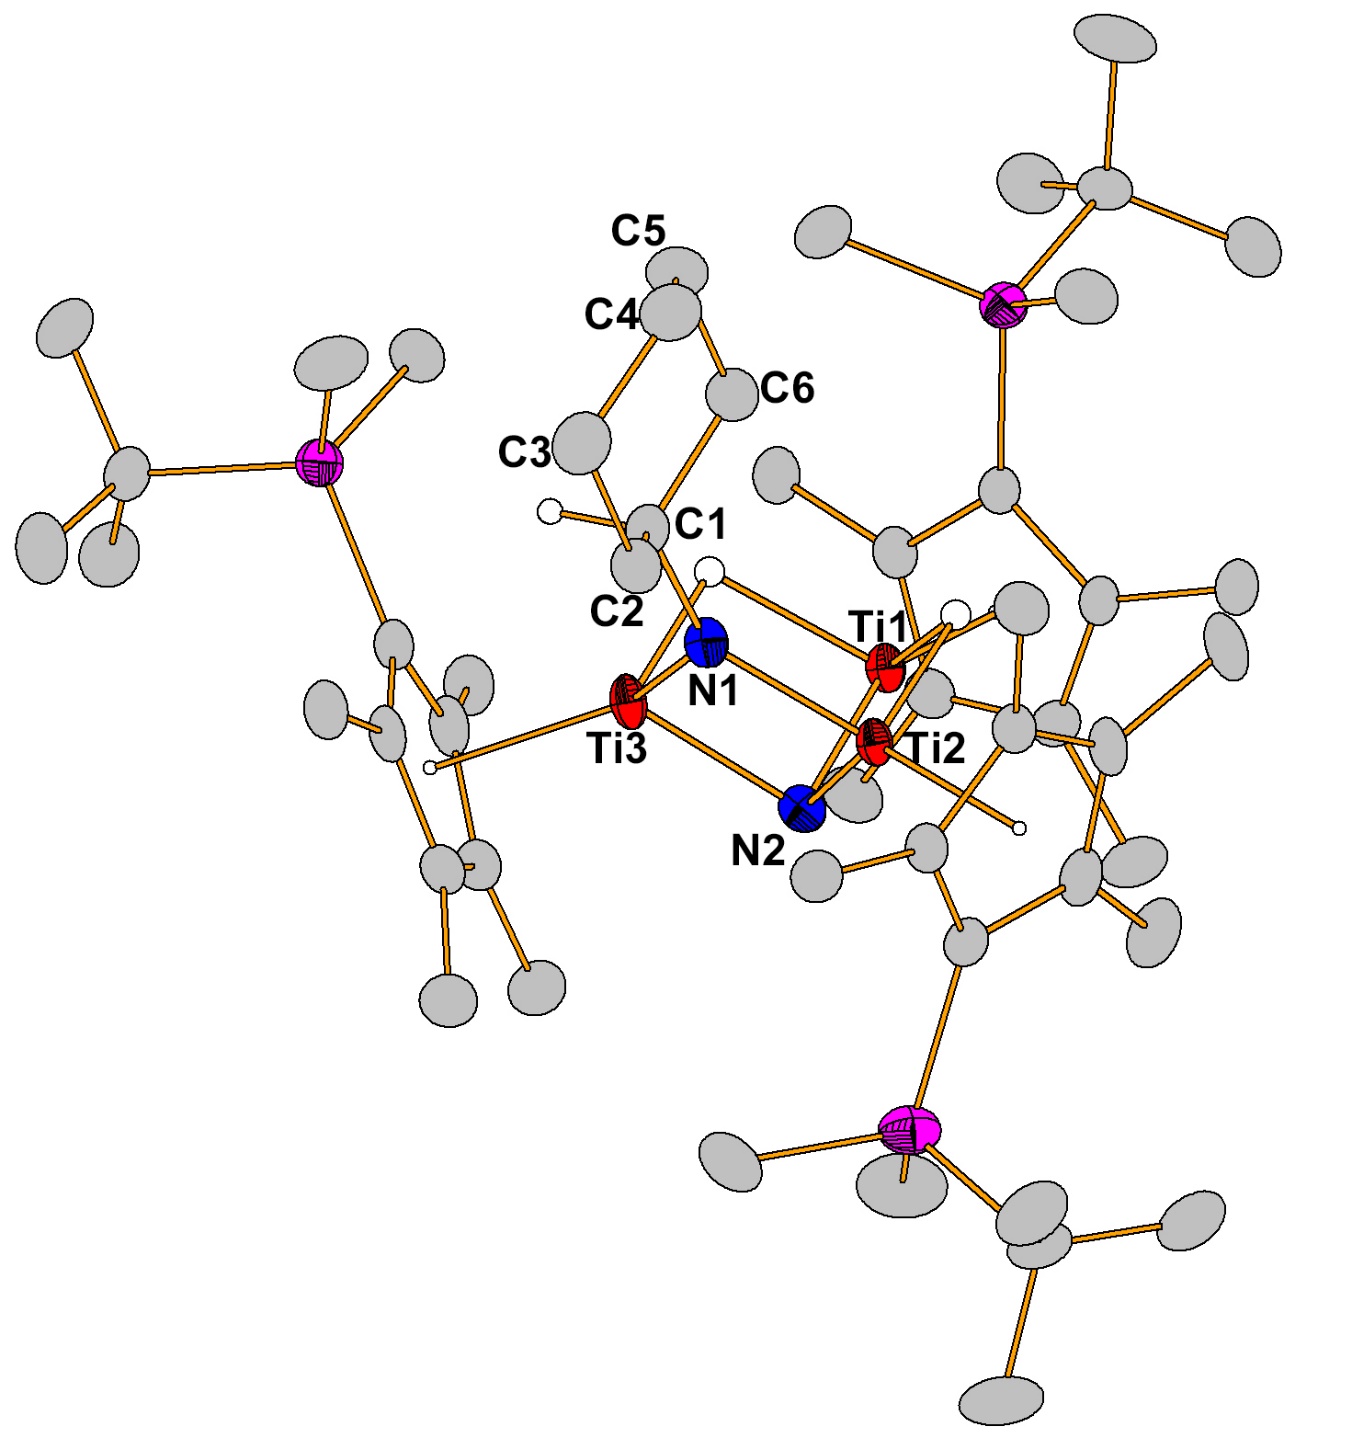


**Figure S81.** ORTEP drawing of the structure of **8g’**.

Computational section

All the DFT calculations were performed using the Gaussian 16 program package.[[7]](#endnote-7) Due to relatively large molecular size, the ligands of C5Me4SiMe3 in each structure were replaced by C5H4SiH3 for the mechanism calculations. For example, [(C5H4SiH3)3Ti3(*μ*-*η*1:*η*2:*η*2-C=CCH3)(*μ*-H)4] (**4m**) was used for modelling [(C5Me4SiMe3)3Ti3(*μ*-*η*1:*η*2:*η*2-C=CCH3)(*μ*-H)4] (**4a**). Our previous studies have demonstrated that such model complexes with simplified ligands could well reproduce the core skeletons of the structures and have little inflect on relative energies.[[8]](#endnote-8),[[9]](#endnote-9) The geometries of all stationary points were optimized by unrestricted TPSSTPSS functional,[[10]](#endnote-10) which often shows the best performance for the structure and energy calculations for transition-metal-containing systems.[[11]](#endnote-11),[[12]](#endnote-12),[[13]](#endnote-13) In the geometrical optimizations, the 6-31G(d) basis set was considered for C, H, N, and Si atoms and the Stuttgart/Dresden[[14]](#endnote-14),[[15]](#endnote-15) effective core potentials (ECP) as well as the associated valence basis sets were used for Ti atoms. Such basis sets are denoted as “BSI”. Considering potential antiferromagnetic coupling in some structures, the combination of the spin-unrestricted manner and the keyword of scf=nosymm was used in optimizations. All structures were optimized without any geometrical symmetry restriction. Frequency calculations of each optimized structure were subsequently analyzed to conform a stationary point as a minimum (no imaginary frequency) or a transition state (one imaginary frequency) and to obtained the thermodynamic corrections to Gibbs free energy. Based on the TPSSTPSS/BSI geometries optimized in gas-phase, single-point calculations were further performed with higher level basis sets (*i.e.,* BSII) to obtain more accurate energies. In the BSII, the basis sets for Ti atoms are same as that in geometrical optimization, and 6-311+G(d,p) basis sets were utilized for the remaining atoms. In these single point calculations, the solvation effect of *n*-hexane was also considered by using the SMD[[16]](#endnote-16) model and dispersion corrections were included through GD3BJ approach.[[17]](#endnote-17) The stabilities of wave functions were tested by the keyword of stable=opt in this work. The theoretical strategy adopted here has successfully applied in previous similar multinuclear titanium systems.8,9,[[18]](#endnote-18),[[19]](#endnote-19) To reduce the overestimation of the entropy contribution derived from the gas-phase model, corrections for free energies were made by −2.6 (or +2.6) kcal/mol for two-to-one (or one-to-two) transformations, which have been used in many earlier studies.9,19,[[20]](#endnote-20),[[21]](#endnote-21),[[22]](#endnote-22) The relative Gibbs free energies in solution were used for discussion of the mechanism in this study.

**Figure S82.** Computed pathways for the initial N2 coordination and the subsequent reductive elimination of C-H bond. The Gibbs free energies are given in kcal/mol.

**Figure S83.** Computed pathway for the conversion of **4m** to **6m**. The Gibbs free energies are given in kcal/mol.

**Figure S84.** Computed pathways for the conversion of **6m** to **5m** (red line) and the conversion of **5m** to **3m** (green line). The Gibbs free energies are given in kcal/mol.

**Figure S85.** Computed pathways for the conversion of **5m** to **8m**. The C5H4SiH3 ligands in displayed structures are omitted for clarity. The Gibbs free energies are given in kcal/mol.

**Table S4.** Imaginary frequency of transition state (cm-1), single-point calculation energy (*E*sp, a.u.), gas-phase thermal correction to Gibbs free energy (ΔΔ*G*,a.u.), relative free energy (Δ*G*, kcal/mol), and relative free energy corrected by empirical value (Δ*G*corr., kcal/mol).

|  | Image. Freq. | *E*sp | ΔΔ*G* | *G* | Δ*G* | Δ*G*corr. |
| --- | --- | --- | --- | --- | --- | --- |
| **N2** | / | -109.570655 | -0.013053 | -109.583708 | / | / |
| **H2** | / | -1.179258 | -0.001306 | -1.180564 | / | / |
| **2m** | / | -1746.851884 | 0.311096 | -1746.540788 | 0.0 | 0.0 |
| **A** | / | -1856.443114 | 0.319001 | -1856.124113 | 0.2 | -2.4 |
| **TS1** | -562.16 | -1856.411411 | 0.315713 | -1856.095698 | 18.1 | 15.5 |
| **B** | / | -1856.434085 | 0.319200 | -1856.114885 | 6.0 | 3.4 |
| **C** | / | -1856.450274 | 0.323240 | -1856.127034 | -1.6 | -4.2 |
| **D** | / | -1856.446610 | 0.323000 | -1856.123610 | 0.6 | -2.0 |
| **TS2** | -629.29 | -1856.446436 | 0.322053 | -1856.124383 | 0.1 | -2.5 |
| **E** | / | -1855.270905 | 0.306212 | -1854.964693 | -13.0 | -13.0 |
| **TS3** | -334.09 | -1855.239692 | 0.304023 | -1854.935669 | 5.2 | 5.2 |
| **6m** | / | -1855.284583 | 0.308504 | -1854.976079 | -20.2 | -20.2 |
| **TS4** | -540.38 | -1855.241960 | 0.304466 | -1854.937494 | 4.0 | 4.0 |
| **F** | / | -1855.309637 | 0.303137 | -1855.006500 | -39.3 | -39.3 |
| **TS5** | -158.58 | -1855.308459 | 0.304777 | -1855.003682 | -37.5 | -37.5 |
| **G** | / | -1855.314949 | 0.304568 | -1855.010381 | -41.7 | -41.7 |
| **TS6** | -197.07 | -1855.302402 | 0.304835 | -1854.997567 | -33.7 | -33.7 |
| **5m** | / | -1855.324083 | 0.305266 | -1855.018817 | -47.0 | -47.0 |
| **TS7** | -587.48 | -1855.288900 | 0.308471 | -1854.980429 | -22.9 | -22.9 |
| **H** | / | -1855.305887 | 0.312287 | -1854.993600 | -31.2 | -31.2 |
| **I** | / | -1855.307506 | 0.308888 | -1854.998618 | -34.3 | -34.3 |
| **TS8** | -1476.56 | -1855.280001 | 0.302383 | -1854.977618 | -21.1 | -21.2 |
| **3m** | / | -1855.333381 | 0.308123 | -1855.025258 | -51.0 | -51.0 |
| **TS9** | -723.24 | -1856.500310 | 0.320971 | -1856.179339 | -34.4 | -37.0 |
| **J** | / | -1856.506397 | 0.322594 | -1856.183803 | -37.2 | -39.8 |
| **TS10** | -737.88 | -1856.484699 | 0.322033 | -1856.162666 | -24.0 | -26.6 |
| **K** | / | -1856.516269 | 0.324707 | -1856.191562 | -42.1 | -44.7 |
| **TS11** | -1051.95 | -1857.679888 | 0.340306 | -1857.339582 | -21.7 | -26.9 |
| **L** | / | -1857.715610 | 0.347245 | -1857.368365 | -39.7 | -44.9 |
| **TS12** | -859.28 | -1857.682349 | 0.344563 | -1857.337786 | -20.5 | -25.7 |
| **8m** | / | -1857.733666 | 0.344242 | -1857.389424 | -52.9 | -58.1 |
| **A'** | / | -1856.443120 | 0.319003 | -1856.124117 | 0.2 | -2.4 |
| **TS1'** | -561.97 | -1856.411411 | 0.315719 | -1856.095692 | 18.1 | 15.5 |
| **B'** | / | -1856.433260 | 0.318915 | -1856.114345 | 6.4 | 3.8 |
| **TS1''** | -550.08 | -1856.397247 | 0.313363 | -1856.083884 | 25.5 | 22.9 |
| **A''** | / | -1856.430416 | 0.316076 | -1856.114340 | 6.4 | 3.8 |
| **B''** | / | -1856.446283 | 0.321870 | -1856.124413 | 0.1 | -2.5 |
| **TS7'** | -1633.98 | -1855.257856 | 0.302043 | -1854.955813 | -7.5 | -7.5 |
| **H'** | / | -1855.314773 | 0.305674 | -1855.009099 | -40.9 | -40.9 |
| **TS7''** | -1226.56 | -1855.244086 | 0.303033 | -1854.941053 | 1.8 | 1.8 |
| **H''** | / | -1855.294535 | 0.304256 | -1854.990279 | -29.1 | -29.1 |
| **TS10'** | -735.03 | -1856.484761 | 0.321890 | -1856.162871 | -24.1 | -26.7 |
| **K'** | / | -1856.494919 | 0.325818 | -1856.169101 | -28.0 | -30.6 |
| **TS13** | -792.47 | -1857.656888 | 0.340202 | -1857.316686 | -7.3 | -12.5 |
| **M** | / | -1857.703946 | 0.344455 | -1857.359491 | -34.2 | -39.4 |
| **TS14** | -1008.33 | -1856.460364 | 0.322149 | -1856.138215 | -8.6 | .-11.2 |
| **N** | / | -1856.483777 | 0.323891 | -1856.159886 | -22.2 | -24.8 |
| **TS15** | -598.95 | -1856.466526 | 0.324218 | -1856.142308 | -11.2 | -13.8 |
| **O** | / | -1856.497241 | 0.326541 | -1856.170700 | -29.0 | -31.6 |
| **TS11'** | -1184.97 | -1857.651088 | 0.340366 | -1857.310722 | -3.6 | -8.8 |
| **L'** | / | -1857.705955 | 0.341417 | -1857.364538 | -37.3 | -45.5 |
| **TS12'** | -914.50 | -1857.659396 | 0.342847 | -1857.316549 | -7.2 | -12.4 |

**Optimized Cartesian coordinates for all stationary points**

**4m**

Ti 1.049613000 1.029091000 0.645106000

Ti -1.369702000 0.660223000 -0.481508000

Ti 0.310911000 -1.389211000 -0.339637000

Si 4.156067000 1.630870000 -1.121505000

Si -4.007930000 1.164863000 2.044014000

Si -0.083534000 -3.768514000 2.449717000

C 0.654039000 0.564440000 -1.178209000

C -0.119296000 -0.201119000 -2.036093000

C -0.197528000 -0.343358000 -3.535061000

H -0.403830000 0.624420000 -4.020025000

H -0.988697000 -1.044854000 -3.833448000

H 0.754147000 -0.716801000 -3.946581000

C 3.149749000 2.015235000 0.407461000

C 3.148326000 1.306125000 1.659631000

C 2.212570000 1.917854000 2.543352000

C 1.612892000 3.007909000 1.850860000

C 2.183562000 3.070335000 0.546759000

C -3.504162000 1.299994000 0.246531000

C -2.909435000 2.444375000 -0.388063000

C -2.681882000 2.153975000 -1.759393000

C -3.126026000 0.822050000 -2.012966000

C -3.635045000 0.301366000 -0.784419000

C 0.363787000 -3.516411000 0.649713000

C 1.674582000 -3.256101000 0.124073000

C 1.594892000 -3.128005000 -1.289001000

C 0.234500000 -3.307527000 -1.677809000

C -0.518692000 -3.549134000 -0.489906000

H -1.520050000 -1.162141000 -0.251870000

H 1.591259000 -0.710547000 0.802191000

H -0.410680000 -0.168133000 1.088974000

H -0.568835000 1.876826000 0.638207000

H -5.457479000 1.464161000 2.214064000

H -3.236869000 2.145354000 2.849122000

H -3.770539000 -0.210515000 2.551573000

H -2.634941000 3.367066000 0.113141000

H -2.194454000 2.810308000 -2.474954000

H -3.085996000 0.302630000 -2.963951000

H -4.039731000 -0.696472000 -0.646447000

H -1.590858000 -3.713990000 -0.449710000

H -0.154115000 -3.267347000 -2.689269000

H 2.418970000 -2.874717000 -1.950447000

H 2.574912000 -3.128945000 0.716718000

H -0.123221000 -5.218688000 2.789111000

H 0.938553000 -3.121782000 3.310569000

H -1.425813000 -3.202120000 2.737036000

H 3.493070000 2.204474000 -2.319071000

H 4.335708000 0.165317000 -1.285932000

H 5.517463000 2.232552000 -1.022849000

H 3.749594000 0.431471000 1.887868000

H 1.974654000 1.589044000 3.550763000

H 0.831634000 3.656224000 2.235055000

H 1.902595000 3.771845000 -0.232911000

**N2**

N 0.000000000 0.000000000 0.557023000

N 0.000000000 0.000000000 -0.557023000

**H2**

H 0.000000000 0.000000000 0.370085000

H 0.000000000 0.000000000 -0.370085000

**A**

Ti 0.369992000 1.286431000 -0.554788000

Ti 0.849128000 -1.352143000 -0.111360000

Ti -1.599698000 -0.366691000 0.441500000

Si 0.445380000 4.079628000 1.743276000

Si 4.492428000 -0.475070000 -0.470344000

Si -4.110359000 -0.338728000 -2.236169000

C 0.292461000 0.436332000 1.170099000

C -0.319497000 -0.441172000 2.012364000

C -0.195819000 -0.781873000 3.470063000

H 0.851001000 -0.921635000 3.780989000

H -0.762966000 -1.684053000 3.735293000

H -0.597117000 0.051578000 4.068098000

C 0.750622000 3.520671000 -0.014804000

C -0.187132000 3.492375000 -1.107366000

C 0.456722000 2.966283000 -2.264918000

C 1.799261000 2.654988000 -1.908058000

C 1.980807000 2.991522000 -0.536296000

C 3.212541000 -1.682450000 0.171026000

C 2.585701000 -1.664255000 1.454671000

C 1.674533000 -2.760232000 1.546678000

C 1.725530000 -3.473027000 0.311463000

C 2.676090000 -2.813772000 -0.526865000

C -3.769484000 -0.585144000 -0.413312000

C -3.779397000 0.430911000 0.609864000

C -3.483427000 -0.167935000 1.866435000

C -3.275002000 -1.558400000 1.649009000

C -3.456683000 -1.814125000 0.260681000

H -0.871164000 -2.007120000 -0.007304000

H -1.451978000 1.292978000 -0.377817000

H -0.530971000 -0.290863000 -1.161743000

H 1.583162000 0.011349000 -1.087821000

H 5.861993000 -1.007592000 -0.224583000

H 4.374783000 0.820681000 0.242085000

H 4.340974000 -0.275362000 -1.933413000

H 2.741016000 -0.904991000 2.213616000

H 1.048960000 -3.006665000 2.396798000

H 1.144535000 -4.353109000 0.055027000

H 2.938930000 -3.108859000 -1.537770000

H -3.337008000 -2.781164000 -0.218278000

H -2.994244000 -2.288624000 2.400989000

H -3.393101000 0.351247000 2.815802000

H -3.961634000 1.488016000 0.442051000

H -5.546967000 -0.580990000 -2.549173000

H -3.789493000 1.058333000 -2.623385000

H -3.306866000 -1.289350000 -3.046318000

H 1.459176000 3.474938000 2.643302000

H -0.922278000 3.709229000 2.190591000

H 0.558775000 5.562322000 1.858173000

H -1.225163000 3.805665000 -1.054561000

H -0.004146000 2.803804000 -3.234692000

H 2.543941000 2.202316000 -2.555396000

H 2.888250000 2.831754000 0.037811000

N 0.474254000 -2.181480000 -2.020334000

N 0.243041000 -2.629486000 -3.028979000

**TS1**

Ti 0.251856000 1.343242000 -0.500939000

Ti 1.071539000 -1.168114000 0.136013000

Ti -1.541566000 -0.586594000 0.420812000

Si 0.595140000 4.083165000 1.837911000

Si 4.372920000 -0.798265000 -1.404149000

Si -3.870417000 -0.771074000 -2.402214000

C -0.027846000 0.641549000 1.282565000

C -0.412028000 -0.377253000 2.105656000

C -0.329795000 -0.659619000 3.579094000

H 0.640891000 -0.371786000 4.012026000

H -0.515805000 -1.718711000 3.802001000

H -1.102399000 -0.075141000 4.104153000

C 0.484741000 3.586936000 0.037238000

C -0.713650000 3.456259000 -0.746526000

C -0.362185000 3.040802000 -2.065787000

C 1.052279000 2.913803000 -2.124629000

C 1.574873000 3.233762000 -0.838652000

C 3.349139000 -1.639795000 -0.078925000

C 3.108657000 -1.152145000 1.257713000

C 2.270097000 -2.078535000 1.940654000

C 1.978589000 -3.149567000 1.042615000

C 2.652041000 -2.890280000 -0.181642000

C -3.644887000 -0.944606000 -0.553108000

C -3.781737000 0.113727000 0.420757000

C -3.539105000 -0.417731000 1.715041000

C -3.246960000 -1.805987000 1.574773000

C -3.320216000 -2.128565000 0.191750000

H -0.513192000 -2.102099000 0.256938000

H -1.343870000 0.617868000 -0.960137000

H 1.497241000 0.101703000 -1.132031000

H 1.389041000 0.546318000 0.765811000

H 5.766532000 -1.325870000 -1.400120000

H 4.436929000 0.660209000 -1.136243000

H 3.796042000 -1.052569000 -2.747845000

H 3.514752000 -0.237111000 1.676857000

H 1.922150000 -1.994537000 2.963342000

H 1.340973000 -4.002517000 1.252508000

H 2.611261000 -3.517651000 -1.067060000

H -3.118576000 -3.107218000 -0.234888000

H -2.982997000 -2.487388000 2.377395000

H -3.537597000 0.142060000 2.645398000

H -4.007452000 1.150827000 0.191980000

H -5.212589000 -1.264574000 -2.821255000

H -3.772227000 0.662667000 -2.776059000

H -2.853676000 -1.559675000 -3.143684000

H 1.749084000 3.414367000 2.491671000

H -0.666973000 3.742846000 2.541491000

H 0.801751000 5.554554000 1.969505000

H -1.724857000 3.617483000 -0.385915000

H -1.058594000 2.824049000 -2.870013000

H 1.630168000 2.579601000 -2.981205000

H 2.624500000 3.202309000 -0.559744000

N 0.508528000 -1.830323000 -1.763224000

N 0.287212000 -2.255084000 -2.787857000

**B**

Ti -0.030922000 1.401363000 0.111316000

Ti 1.475176000 -0.841688000 -0.221419000

Ti -1.144262000 -1.159958000 0.283688000

Si -2.611769000 3.621190000 1.541378000

Si 4.493151000 1.320662000 0.002925000

Si -3.812987000 -1.106198000 -2.190698000

C 0.267433000 -0.029281000 1.483609000

C 0.259729000 -1.418205000 1.685184000

C 0.594409000 -2.199783000 2.929735000

H 1.603565000 -1.975698000 3.312164000

H 0.533189000 -3.283535000 2.759441000

H -0.115179000 -1.952733000 3.736774000

C -1.275151000 3.395687000 0.253554000

C -1.447417000 2.896693000 -1.084502000

C -0.193870000 2.898952000 -1.752825000

C 0.782346000 3.422525000 -0.847241000

C 0.126215000 3.722283000 0.375298000

C 3.813978000 -0.422574000 -0.018339000

C 3.398025000 -1.192354000 1.114291000

C 2.928936000 -2.461547000 0.663991000

C 3.048913000 -2.494861000 -0.757783000

C 3.592658000 -1.246047000 -1.174048000

C -3.240540000 -1.759564000 -0.535633000

C -3.455816000 -1.136753000 0.748023000

C -2.866833000 -1.943425000 1.755849000

C -2.280871000 -3.080245000 1.125707000

C -2.513244000 -2.973953000 -0.272151000

H 0.111949000 -1.990714000 -0.780507000

H -1.483878000 0.504212000 -0.412850000

H 1.622318000 0.978672000 -0.456895000

H 0.428275000 0.768805000 2.255981000

H 5.974316000 1.308496000 0.165631000

H 3.922097000 2.087105000 1.140714000

H 4.187385000 2.012459000 -1.275499000

H 3.410037000 -0.850517000 2.144739000

H 2.545467000 -3.260819000 1.288018000

H 2.760850000 -3.316458000 -1.405993000

H 3.789140000 -0.953931000 -2.201255000

H -2.165782000 -3.677923000 -1.022674000

H -1.728979000 -3.871098000 1.623237000

H -2.831485000 -1.715551000 2.817104000

H -3.955723000 -0.186268000 0.908191000

H -5.035913000 -1.816649000 -2.658456000

H -4.144019000 0.336747000 -2.061878000

H -2.765787000 -1.287109000 -3.229312000

H -2.083575000 3.306171000 2.895920000

H -3.759557000 2.730286000 1.234941000

H -3.107460000 5.025140000 1.571192000

H -2.382093000 2.537155000 -1.501930000

H -0.005415000 2.543669000 -2.761094000

H 1.841798000 3.537853000 -1.049830000

H 0.606091000 4.117833000 1.267915000

N 1.020947000 -0.529586000 -2.234614000

N 0.860496000 -0.402267000 -3.349015000

**C**

Ti 0.144111000 1.368463000 -0.445485000

Ti 1.398719000 -0.962895000 -0.164584000

Ti -1.332870000 -0.964347000 0.133394000

Si -1.983463000 3.090975000 2.113945000

Si 4.726849000 0.632460000 -0.263513000

Si -3.910464000 -0.808388000 -2.412278000

C 0.069829000 0.138067000 1.332976000

C 0.021339000 -1.268374000 1.555491000

C 0.209685000 -1.983215000 2.873326000

H 1.210547000 -1.811895000 3.301994000

H 0.069811000 -3.068740000 2.774305000

H -0.522446000 -1.621735000 3.613993000

C -0.736176000 3.238694000 0.727667000

C -1.032098000 3.397504000 -0.674052000

C 0.183037000 3.539886000 -1.394898000

C 1.255157000 3.433201000 -0.463382000

C 0.690464000 3.257419000 0.838458000

C 3.752867000 -0.960263000 -0.119496000

C 3.278452000 -1.567915000 1.097154000

C 2.589342000 -2.770240000 0.774188000

C 2.612151000 -2.916616000 -0.646418000

C 3.333414000 -1.816331000 -1.189452000

C -3.433634000 -1.461227000 -0.724183000

C -3.642192000 -0.791861000 0.536155000

C -3.126190000 -1.598419000 1.582713000

C -2.587106000 -2.782318000 1.001351000

C -2.779092000 -2.704374000 -0.406881000

H -0.071515000 -1.877539000 -0.883240000

H 0.298877000 0.812939000 2.166125000

H -1.499701000 0.616393000 -0.784945000

H 1.857264000 0.813738000 -0.018508000

H 6.189739000 0.350634000 -0.295513000

H 4.458301000 1.499536000 0.912070000

H 4.378153000 1.349884000 -1.516046000

H 3.409141000 -1.158927000 2.094965000

H 2.117916000 -3.449193000 1.475382000

H 2.142894000 -3.714217000 -1.213631000

H 3.492985000 -1.628898000 -2.247141000

H -2.451410000 -3.447994000 -1.127546000

H -2.091126000 -3.586270000 1.535010000

H -3.098959000 -1.337086000 2.636262000

H -4.076335000 0.196423000 0.655306000

H -5.131781000 -1.494618000 -2.919566000

H -4.203823000 0.642945000 -2.306009000

H -2.824662000 -1.038702000 -3.398982000

H -1.429785000 2.292902000 3.237937000

H -3.237347000 2.469519000 1.617923000

H -2.327739000 4.437727000 2.649664000

H -2.026754000 3.391045000 -1.109971000

H 0.277925000 3.643666000 -2.470519000

H 2.314702000 3.466262000 -0.697380000

H 1.258429000 3.133454000 1.755764000

N 0.858073000 -0.048303000 -1.875866000

N 0.467809000 0.805379000 -2.594037000

**D**

Ti 0.034608000 1.303227000 -0.186035000

Ti 1.746331000 -0.769528000 -0.113062000

Ti -1.034226000 -1.405732000 0.118734000

Si -3.212455000 3.060775000 0.860727000

Si 4.846713000 1.158536000 -0.670008000

Si -3.812177000 -1.573271000 -2.204295000

C -0.641178000 0.451956000 1.537658000

C 0.610389000 -0.106618000 1.673453000

C 1.222172000 -0.416423000 3.036281000

H 2.011004000 0.321258000 3.248928000

H 1.689867000 -1.408932000 3.061261000

H 0.473483000 -0.358437000 3.842514000

C -1.496895000 3.153076000 0.127236000

C -1.160897000 3.044900000 -1.260894000

C 0.234044000 3.274561000 -1.417916000

C 0.782998000 3.549609000 -0.125803000

C -0.272405000 3.465529000 0.816920000

C 4.080828000 -0.523160000 -0.363584000

C 3.868205000 -1.153192000 0.914745000

C 3.283383000 -2.430265000 0.704709000

C 3.126673000 -2.618360000 -0.701293000

C 3.620139000 -1.458179000 -1.355820000

C -3.241721000 -1.943990000 -0.455898000

C -3.309687000 -1.049182000 0.661407000

C -2.734509000 -1.686413000 1.797253000

C -2.288016000 -2.974572000 1.401495000

C -2.599569000 -3.138803000 0.019052000

H 0.635222000 -2.014995000 0.709018000

H -1.304243000 0.695319000 2.374985000

H -0.337695000 -2.837241000 -0.540269000

H 1.891056000 1.069727000 -0.153680000

H 6.320962000 1.039911000 -0.846736000

H 4.598811000 2.050824000 0.491331000

H 4.287744000 1.763034000 -1.905696000

H 4.102442000 -0.712481000 1.879113000

H 2.979061000 -3.133259000 1.473744000

H 2.658362000 -3.473276000 -1.179556000

H 3.610456000 -1.286381000 -2.428713000

H -2.396752000 -4.026944000 -0.568088000

H -1.768884000 -3.695177000 2.026013000

H -2.629584000 -1.254457000 2.787110000

H -3.711356000 -0.042329000 0.636329000

H -4.035345000 -0.115492000 -2.358542000

H -2.833579000 -2.065983000 -3.204062000

H -5.107163000 -2.265646000 -2.464142000

H -3.201171000 2.371224000 2.178408000

H -4.120453000 2.341501000 -0.067928000

H -3.763256000 4.425963000 1.080494000

H -1.847735000 2.772291000 -2.055573000

H 0.791197000 3.220333000 -2.349040000

H 1.827155000 3.745789000 0.095308000

H -0.169409000 3.594724000 1.890559000

N 0.275772000 -0.441125000 -1.162340000

N -1.003021000 -0.019381000 -1.344670000

**TS2**

Ti 0.015744000 1.312498000 -0.194703000

Ti 1.754843000 -0.722513000 -0.140478000

Ti -1.020198000 -1.371300000 0.154867000

Si -3.270391000 3.005245000 0.839985000

Si 4.887918000 1.172307000 -0.617693000

Si -3.726311000 -1.645020000 -2.236254000

C -0.658609000 0.416379000 1.507280000

C 0.599779000 -0.159997000 1.629188000

C 1.206457000 -0.447190000 3.003190000

H 1.933558000 0.343003000 3.246111000

H 1.741263000 -1.404692000 3.034124000

H 0.436603000 -0.450579000 3.791533000

C -1.548464000 3.131870000 0.127540000

C -1.195452000 3.050342000 -1.258420000

C 0.197373000 3.305301000 -1.395803000

C 0.726308000 3.570331000 -0.093318000

C -0.337467000 3.453765000 0.836014000

C 4.100164000 -0.503976000 -0.338618000

C 3.848135000 -1.137299000 0.930234000

C 3.253131000 -2.407085000 0.699941000

C 3.131598000 -2.586444000 -0.711120000

C 3.654383000 -1.428443000 -1.346730000

C -3.193132000 -1.978308000 -0.468422000

C -3.323836000 -1.073390000 0.636036000

C -2.764219000 -1.678195000 1.796311000

C -2.263622000 -2.954502000 1.431295000

C -2.526144000 -3.144857000 0.039875000

H 0.608072000 -2.114629000 0.575273000

H -1.308200000 0.666404000 2.352379000

H -0.160680000 -2.830750000 -0.250951000

H 1.882575000 1.106526000 -0.183832000

H 6.365648000 1.042926000 -0.753872000

H 4.614941000 2.063084000 0.539133000

H 4.368167000 1.784700000 -1.866586000

H 4.061681000 -0.703317000 1.902315000

H 2.928401000 -3.112765000 1.458310000

H 2.675699000 -3.438034000 -1.207602000

H 3.673685000 -1.251052000 -2.418664000

H -2.275941000 -4.032948000 -0.530177000

H -1.744426000 -3.652024000 2.081620000

H -2.703161000 -1.230145000 2.782584000

H -3.756841000 -0.080628000 0.586185000

H -3.988931000 -0.197572000 -2.418168000

H -2.707690000 -2.124365000 -3.202624000

H -4.992184000 -2.380626000 -2.520479000

H -3.266666000 2.292278000 2.145167000

H -4.159971000 2.293043000 -0.111836000

H -3.840119000 4.359738000 1.077827000

H -1.869372000 2.780143000 -2.064938000

H 0.765854000 3.276463000 -2.321139000

H 1.764939000 3.778217000 0.142970000

H -0.248846000 3.568321000 1.912579000

N 0.264883000 -0.441244000 -1.182126000

N -1.010879000 -0.014048000 -1.355265000

**E**

Ti 0.538144000 1.386232000 -0.562711000

Ti -1.807658000 0.186450000 -0.189304000

Ti 0.574390000 -1.386991000 -0.337909000

Si 2.866379000 2.669731000 1.968077000

Si -3.659348000 0.441836000 2.976933000

Si 3.131025000 -2.389260000 2.097823000

N -0.272691000 0.043020000 0.817014000

N 1.086785000 0.083820000 0.936114000

C 0.787629000 -0.140083000 -1.940141000

H 1.391061000 -0.252683000 -2.846959000

C -0.652208000 -0.213847000 -1.917193000

C -1.344817000 -0.342115000 -3.282020000

H -1.384925000 0.640673000 -3.777122000

H -2.372421000 -0.719450000 -3.216362000

H -0.777501000 -1.018079000 -3.943626000

C 2.177057000 2.890403000 0.236987000

C 2.692192000 2.307653000 -0.966537000

C 1.863620000 2.686861000 -2.062153000

C 0.815935000 3.503051000 -1.554381000

C 1.001770000 3.622444000 -0.142697000

C -3.743207000 0.033131000 1.150489000

C -4.031696000 0.933836000 0.067184000

C -4.016945000 0.204041000 -1.157994000

C -3.708312000 -1.152917000 -0.855045000

C -3.538196000 -1.259405000 0.552975000

C 2.200751000 -2.855125000 0.537293000

C 0.927226000 -3.525183000 0.455446000

C 0.565549000 -3.673027000 -0.919141000

C 1.599466000 -3.084152000 -1.701936000

C 2.595019000 -2.588752000 -0.813433000

H 0.335756000 -3.858833000 1.304999000

H -0.344574000 -4.128688000 -1.298368000

H 1.611242000 -3.002780000 -2.783804000

H 3.488140000 -2.047128000 -1.111965000

H 2.181120000 -2.086464000 3.195558000

H 3.980277000 -3.534168000 2.533926000

H 4.022143000 -1.235925000 1.828743000

H -0.004066000 3.925984000 -2.126386000

H 1.994501000 2.384200000 -3.095837000

H 3.552383000 1.647366000 -1.026693000

H 0.344970000 4.162213000 0.533517000

H 3.662272000 3.875546000 2.338095000

H 3.772289000 1.497855000 2.005326000

H 1.773637000 2.533899000 2.961730000

H -3.597260000 -1.961401000 -1.570773000

H -4.183756000 0.619411000 -2.147099000

H -3.285275000 -2.168461000 1.092223000

H -4.224946000 1.998180000 0.164465000

H -5.021690000 0.444658000 3.578153000

H -3.067993000 1.788324000 3.184662000

H -2.846252000 -0.584207000 3.677341000

H -1.282854000 1.913696000 -0.473198000

**TS3**

Ti -1.478941000 -0.864547000 -0.164990000

Ti 1.281313000 -1.216573000 -0.368403000

Ti 0.139975000 1.414715000 -0.427990000

Si -4.465162000 0.111691000 1.621309000

Si 2.638022000 -1.493548000 3.029310000

Si -0.109048000 4.497791000 1.516352000

N 0.786895000 0.002146000 1.003206000

N -0.599319000 0.376216000 0.986783000

C -1.174789000 0.517094000 -1.733406000

H -1.737677000 0.772774000 -2.637382000

C -0.019989000 -0.331834000 -1.744071000

C 0.569149000 -0.979555000 -3.000785000

H -0.190306000 -1.586950000 -3.514214000

H 1.424925000 -1.655292000 -2.799435000

H 0.939083000 -0.211226000 -3.696126000

C -3.699275000 -1.117711000 0.431222000

C -3.669440000 -1.040574000 -1.007162000

C -3.035561000 -2.211436000 -1.515628000

C -2.648425000 -3.016986000 -0.414192000

C -3.041070000 -2.347981000 0.781053000

C 2.973060000 -1.866767000 1.221377000

C 2.578975000 -3.028717000 0.471111000

C 2.965983000 -2.851885000 -0.888501000

C 3.574808000 -1.567712000 -1.008479000

C 3.583058000 -0.972056000 0.286057000

C 0.626851000 3.644348000 0.020069000

C 1.877678000 2.932836000 -0.037097000

C 2.087239000 2.471047000 -1.366489000

C 0.979584000 2.904599000 -2.158715000

C 0.089297000 3.615825000 -1.317789000

H 2.525356000 2.735388000 0.811728000

H 2.936858000 1.894510000 -1.718572000

H 0.823224000 2.687783000 -3.210946000

H -0.863337000 4.039473000 -1.624331000

H 0.389592000 3.859326000 2.759247000

H 0.273779000 5.936840000 1.543462000

H -1.592634000 4.425775000 1.466439000

H -2.104928000 -3.954635000 -0.467192000

H -2.841717000 -2.423932000 -2.562938000

H -4.078544000 -0.233082000 -1.605512000

H -2.860129000 -2.700587000 1.792701000

H -5.940521000 -0.078768000 1.682013000

H -4.206462000 1.505203000 1.175691000

H -3.906198000 -0.100815000 2.979026000

H 3.968152000 -1.126858000 -1.920724000

H 2.792510000 -3.557645000 -1.697212000

H 3.954125000 0.021189000 0.520623000

H 2.074155000 -3.902145000 0.872850000

H 3.587501000 -2.280885000 3.870572000

H 1.266092000 -1.893024000 3.425229000

H 2.886060000 -0.058129000 3.301235000

H -0.159773000 -2.240197000 0.025220000

**6m**

Ti 0.040487000 1.090629000 0.605118000

Ti 1.093850000 -1.377207000 -0.227255000

Ti -1.723609000 -0.726543000 -0.016011000

Si 1.121103000 4.088886000 -1.198075000

Si 4.022413000 -0.260529000 -2.071231000

Si -4.277073000 1.012147000 -1.986768000

N -0.251769000 -0.092069000 -1.041219000

N 1.025100000 0.469901000 -0.983570000

C -0.442562000 -2.094571000 0.887198000

H -0.624199000 -3.021126000 1.442514000

C -0.153956000 -0.847570000 1.576968000

C -0.035038000 -0.910386000 3.106543000

H -0.259539000 0.043820000 3.598241000

H 0.979661000 -1.211849000 3.411327000

H -0.733967000 -1.660729000 3.508602000

C 0.898655000 3.298949000 0.489803000

C -0.274857000 3.309078000 1.319061000

C -0.018733000 2.541543000 2.491484000

C 1.311439000 2.038232000 2.398872000

C 1.872632000 2.502280000 1.176554000

C 3.341106000 -1.520562000 -0.864287000

C 3.332060000 -1.424690000 0.566492000

C 2.699471000 -2.580716000 1.108496000

C 2.298281000 -3.414003000 0.031142000

C 2.676723000 -2.761255000 -1.180145000

C -3.886365000 -0.422537000 -0.851029000

C -3.432488000 -1.735117000 -1.230294000

C -3.270831000 -2.529346000 -0.060279000

C -3.637301000 -1.726814000 1.063793000

C -4.013932000 -0.447827000 0.583823000

H -1.783711000 0.987676000 0.640926000

H -3.592045000 -2.030757000 2.105078000

H -2.923646000 -3.556370000 -0.026066000

H -3.212981000 -2.055012000 -2.245978000

H -5.702462000 0.974921000 -2.418470000

H -3.430757000 0.944146000 -3.205048000

H -4.048916000 2.298267000 -1.280127000

H -4.307210000 0.396154000 1.200542000

H 2.860203000 2.259827000 0.797188000

H 1.803498000 1.395544000 3.121743000

H -0.727147000 2.351415000 3.291542000

H -1.213512000 3.803899000 1.085951000

H 2.428195000 3.676203000 -1.762153000

H 1.102450000 5.572235000 -1.068036000

H 0.020698000 3.706764000 -2.120142000

H 1.766997000 -4.356664000 0.114881000

H 2.512038000 -2.770141000 2.160774000

H 3.724192000 -0.593107000 1.144524000

H 2.497268000 -3.140527000 -2.184230000

H 5.413960000 -0.633734000 -2.456331000

H 3.208807000 -0.229299000 -3.311035000

H 4.076751000 1.077077000 -1.433604000

**TS4**

Ti -0.221866000 1.159588000 0.575875000

Ti 1.622990000 -0.817079000 0.020564000

Ti -1.242066000 -1.236097000 0.013953000

Si -1.124548000 4.099760000 -1.486354000

Si 4.161521000 0.891747000 -1.894717000

Si -4.199326000 -0.414125000 -1.961987000

N 0.068014000 -0.337507000 -0.966617000

N 1.369688000 1.039807000 -0.390436000

C 0.276800000 -1.940396000 1.235035000

H 0.437579000 -2.848462000 1.828252000

C 0.148331000 -0.654207000 1.812845000

C 0.175487000 -0.503631000 3.337473000

H 0.698363000 0.403683000 3.665498000

H 0.664016000 -1.369414000 3.811913000

H -0.852371000 -0.447151000 3.726676000

C -0.815094000 3.445769000 0.245171000

C -1.772653000 2.883756000 1.158753000

C -1.099607000 2.507868000 2.355948000

C 0.278457000 2.839167000 2.202416000

C 0.451050000 3.420124000 0.915640000

C 3.780676000 -0.656009000 -0.908985000

C 3.983847000 -0.839646000 0.497625000

C 3.507273000 -2.127552000 0.876520000

C 3.009997000 -2.769726000 -0.291726000

C 3.163108000 -1.868514000 -1.383374000

C -3.343244000 -1.676169000 -0.875545000

C -2.445176000 -2.723496000 -1.288643000

C -2.045777000 -3.469542000 -0.142818000

C -2.696417000 -2.909216000 0.994067000

C -3.486036000 -1.814480000 0.552146000

H -1.877179000 0.366367000 0.542857000

H -2.570634000 -3.232719000 2.022669000

H -1.346424000 -4.299523000 -0.131525000

H -2.102421000 -2.895564000 -2.305430000

H -5.440154000 -0.986751000 -2.554033000

H -3.312654000 0.005211000 -3.075707000

H -4.583027000 0.763897000 -1.142761000

H -4.077547000 -1.163107000 1.188378000

H 1.396313000 3.732064000 0.485036000

H 1.067024000 2.659226000 2.927078000

H -1.553288000 2.026971000 3.216471000

H -2.830910000 2.744030000 0.961818000

H 0.177539000 4.364874000 -2.144621000

H -1.898055000 5.370051000 -1.422547000

H -1.911774000 3.132394000 -2.293535000

H 2.549602000 -3.752288000 -0.331993000

H 3.504400000 -2.539378000 1.881358000

H 4.396876000 -0.096178000 1.174496000

H 2.850110000 -2.056163000 -2.407120000

H 5.513905000 0.763267000 -2.513928000

H 3.184860000 1.077275000 -2.993877000

H 4.199476000 2.072273000 -0.997179000

**F**

Ti 0.368381000 1.460795000 0.598313000

Ti 1.179839000 -1.082993000 0.333524000

Ti -1.617606000 -0.336036000 0.489083000

Si -0.266483000 3.105032000 -2.646948000

Si 4.501905000 -0.792706000 -1.115017000

Si -3.091118000 -1.722400000 -2.551268000

N -0.142125000 -0.029255000 -0.597718000

N 1.825967000 0.432209000 1.081149000

C -0.425376000 -1.527339000 1.743085000

H -0.430183000 -2.443333000 2.343421000

C -0.186292000 -0.250506000 2.203369000

C 0.111330000 0.184825000 3.624722000

H 0.725440000 1.092158000 3.668902000

H 0.615702000 -0.605891000 4.200003000

H -0.847826000 0.411283000 4.116844000

C 0.290977000 3.331413000 -0.873984000

C -0.527553000 3.692034000 0.245033000

C 0.286238000 3.755233000 1.413702000

C 1.631336000 3.483524000 1.027919000

C 1.636093000 3.210164000 -0.361923000

C 3.112298000 -1.965345000 -0.672770000

C 2.954796000 -2.658221000 0.574855000

C 1.775604000 -3.451374000 0.516258000

C 1.200000000 -3.289526000 -0.779564000

C 2.005727000 -2.376369000 -1.502297000

C -3.382286000 -1.201132000 -0.773927000

C -3.272624000 -2.023404000 0.403706000

C -3.627603000 -1.247159000 1.542534000

C -3.937713000 0.066030000 1.099465000

C -3.786304000 0.099360000 -0.317597000

H -1.536383000 1.430181000 0.711994000

H -4.205490000 0.909715000 1.728302000

H -3.611796000 -1.587842000 2.573387000

H -2.966923000 -3.065075000 0.421905000

H -4.328948000 -2.321110000 -3.122620000

H -2.021369000 -2.751136000 -2.616536000

H -2.720052000 -0.544941000 -3.372950000

H -3.927247000 0.973622000 -0.946178000

H 2.506054000 2.913898000 -0.940744000

H 2.487405000 3.411984000 1.690540000

H -0.060492000 3.978934000 2.419238000

H -1.601243000 3.845552000 0.217411000

H 0.602273000 2.124088000 -3.342919000

H -0.186280000 4.394337000 -3.389755000

H -1.681190000 2.653740000 -2.682120000

H 0.274958000 -3.738235000 -1.128521000

H 1.387027000 -4.077956000 1.313321000

H 3.605347000 -2.549171000 1.438191000

H 1.803451000 -2.014114000 -2.506246000

H 5.547864000 -1.493026000 -1.913108000

H 4.000878000 0.337853000 -1.939551000

H 5.136468000 -0.277260000 0.123266000

**TS5**

Ti -0.398279000 1.443739000 -0.584113000

Ti -1.087058000 -1.162417000 -0.278746000

Ti 1.656007000 -0.231334000 -0.467013000

Si -0.054046000 3.102693000 2.688762000

Si -4.549640000 -1.025468000 0.880439000

Si 3.351577000 -1.584099000 2.475146000

N 0.154459000 0.009481000 0.632615000

N -1.721685000 0.282156000 -1.198487000

C 0.502229000 -1.503212000 -1.626246000

H 0.606676000 -2.393573000 -2.253717000

C 0.122138000 -0.231951000 -2.109647000

C -0.165288000 0.096280000 -3.565057000

H -0.605839000 1.091067000 -3.698770000

H -0.838699000 -0.644121000 -4.020178000

H 0.790182000 0.073367000 -4.112112000

C -0.562129000 3.300178000 0.897491000

C 0.263212000 3.734837000 -0.189682000

C -0.509938000 3.736217000 -1.388490000

C -1.837473000 3.341834000 -1.054758000

C -1.869572000 3.060048000 0.333895000

C -3.044236000 -2.108425000 0.637174000

C -2.729195000 -2.873346000 -0.536643000

C -1.506200000 -3.567474000 -0.322092000

C -1.058766000 -3.269116000 0.999682000

C -1.987452000 -2.372589000 1.582389000

C 3.522911000 -1.009063000 0.698607000

C 3.415877000 -1.813266000 -0.492150000

C 3.668537000 -0.991875000 -1.625794000

C 3.913178000 0.329567000 -1.165899000

C 3.823339000 0.324340000 0.256843000

H 1.475533000 1.541978000 -0.683444000

H 4.097369000 1.201387000 -1.786231000

H 3.628148000 -1.311158000 -2.662782000

H 3.177568000 -2.871999000 -0.521555000

H 4.647050000 -2.125345000 2.970221000

H 2.342423000 -2.670304000 2.570856000

H 2.958833000 -0.445083000 3.340244000

H 3.936993000 1.192418000 0.899354000

H -2.730843000 2.684976000 0.879362000

H -2.658307000 3.198790000 -1.749620000

H -0.146835000 3.995441000 -2.379535000

H 1.317392000 3.983030000 -0.121437000

H -0.884004000 2.063980000 3.347498000

H -0.246875000 4.380029000 3.431571000

H 1.384357000 2.743868000 2.776409000

H -0.136703000 -3.617053000 1.455567000

H -1.005302000 -4.215967000 -1.034020000

H -3.308641000 -2.877160000 -1.455913000

H -1.898576000 -1.925245000 2.568446000

H -5.616119000 -1.756403000 1.621386000

H -4.208202000 0.183151000 1.676226000

H -5.099272000 -0.622918000 -0.438117000

**G**

Ti -0.361875000 1.451544000 -0.466763000

Ti -0.971948000 -1.217433000 0.076521000

Ti 1.685633000 -0.186383000 -0.444266000

Si -0.285437000 3.377407000 2.667671000

Si -4.655643000 -1.375617000 -0.074884000

Si 3.876040000 -1.544964000 2.141189000

N 0.240996000 0.108327000 0.781102000

N -1.501952000 0.101510000 -1.180601000

C 0.470938000 -1.589421000 -1.263305000

H 0.696714000 -2.406019000 -1.953880000

C -0.196503000 -0.336460000 -1.855084000

C -0.317767000 -0.298133000 -3.379712000

H -0.710004000 0.670993000 -3.713009000

H -1.005263000 -1.081547000 -3.735033000

H 0.663626000 -0.458039000 -3.846540000

C -0.760639000 3.378804000 0.856617000

C 0.050776000 3.795078000 -0.248555000

C -0.694037000 3.638714000 -1.456593000

C -1.986921000 3.149969000 -1.114199000

C -2.026501000 2.974955000 0.291439000

C -3.098428000 -2.195854000 0.557275000

C -2.324367000 -3.199263000 -0.115750000

C -1.210818000 -3.555469000 0.695305000

C -1.281401000 -2.786237000 1.893336000

C -2.425332000 -1.948313000 1.805520000

C 3.736661000 -0.918912000 0.378787000

C 3.475214000 -1.700683000 -0.803540000

C 3.503058000 -0.841848000 -1.935127000

C 3.768042000 0.478902000 -1.481340000

C 3.913356000 0.437182000 -0.064117000

H 1.432730000 1.594164000 -0.757730000

H 3.813704000 1.370906000 -2.098009000

H 3.306122000 -1.136458000 -2.961522000

H 3.277863000 -2.767710000 -0.824533000

H 5.245142000 -2.067725000 2.400278000

H 2.913420000 -2.652519000 2.374490000

H 3.609460000 -0.435092000 3.089461000

H 4.096992000 1.293883000 0.577589000

H -2.865677000 2.570569000 0.851125000

H -2.774269000 2.878030000 -1.809231000

H -0.331518000 3.849279000 -2.459016000

H 1.077267000 4.141875000 -0.182835000

H -1.036648000 2.321598000 3.392400000

H -0.616025000 4.685917000 3.298634000

H 1.175863000 3.159184000 2.816294000

H -0.558412000 -2.794331000 2.703584000

H -0.437635000 -4.272684000 0.439488000

H -2.533158000 -3.593810000 -1.106707000

H -2.727715000 -1.216974000 2.550781000

H -5.868826000 -2.065223000 0.448237000

H -4.719865000 0.038913000 0.377101000

H -4.698428000 -1.439708000 -1.557168000

**TS6**

Ti 0.059428000 1.417915000 0.510455000

Ti 1.291847000 -0.995030000 -0.181361000

Ti -1.511316000 -0.861576000 0.360829000

Si -0.653487000 3.720789000 -2.219504000

Si 4.817162000 -0.243646000 -0.795966000

Si -4.394593000 -0.521623000 -1.852434000

N -0.252576000 -0.026699000 -0.774882000

N 1.720419000 0.485793000 0.903127000

C 0.059317000 -1.411968000 1.490035000

H 0.095146000 -2.202772000 2.249332000

C 0.884169000 -0.178467000 1.881844000

C 1.382359000 -0.134680000 3.322339000

H 1.890615000 0.817897000 3.514148000

H 2.098283000 -0.950808000 3.515100000

H 0.546128000 -0.244202000 4.025577000

C -0.229878000 3.532840000 -0.405696000

C -1.149372000 3.424866000 0.692793000

C -0.405920000 3.329907000 1.910233000

C 0.975824000 3.412587000 1.585438000

C 1.091934000 3.517331000 0.178878000

C 3.459623000 -1.517361000 -0.977760000

C 3.110247000 -2.536297000 -0.028211000

C 2.012421000 -3.292020000 -0.530973000

C 1.672615000 -2.764910000 -1.810438000

C 2.542371000 -1.674893000 -2.077981000

C -3.655161000 -1.392157000 -0.368158000

C -2.880019000 -2.604991000 -0.377303000

C -2.550294000 -2.959431000 0.962036000

C -3.109539000 -1.979546000 1.823795000

C -3.778183000 -1.015320000 1.018095000

H -1.661814000 0.842160000 1.013862000

H -2.999701000 -1.943295000 2.903215000

H -1.941136000 -3.804997000 1.264992000

H -2.575675000 -3.149444000 -1.267919000

H -5.799717000 -0.961147000 -2.074439000

H -3.607898000 -0.853475000 -3.067019000

H -4.404146000 0.947534000 -1.637069000

H -4.289048000 -0.130685000 1.386355000

H 2.026434000 3.537688000 -0.375053000

H 1.802836000 3.313049000 2.280848000

H -0.825393000 3.203910000 2.903778000

H -2.231016000 3.388484000 0.610889000

H 0.423694000 3.134707000 -3.057656000

H -0.784351000 5.158715000 -2.585425000

H -1.946731000 3.054449000 -2.516288000

H 0.855803000 -3.096896000 -2.444474000

H 1.519431000 -4.116400000 -0.026001000

H 3.582603000 -2.678550000 0.940425000

H 2.504807000 -1.043154000 -2.961935000

H 6.047528000 -0.672745000 -1.519784000

H 4.393942000 1.058853000 -1.372658000

H 5.163146000 -0.081551000 0.638052000

**5m**

Ti -0.031428000 1.307976000 -0.176885000

H -1.771699000 0.850135000 -0.296697000

Ti 1.264000000 -0.893954000 0.681568000

Ti -1.448961000 -0.847740000 0.509995000

Si 0.190639000 4.543816000 1.502122000

Si 3.974266000 -1.404665000 -1.887455000

Si -4.426629000 -0.051519000 -1.597869000

N -0.064935000 -2.279013000 0.522324000

N -0.096507000 0.295634000 1.374907000

C 0.131742000 -0.567703000 -1.186218000

H 0.192076000 -0.374141000 -2.262231000

C -0.060499000 -1.968012000 -0.849816000

C -0.088900000 -3.092639000 -1.872184000

H -0.443487000 -2.734207000 -2.847245000

H -0.744460000 -3.898308000 -1.519223000

H 0.917351000 -3.515062000 -2.007031000

C 0.336091000 3.609870000 -0.112809000

C -0.708066000 3.370318000 -1.076653000

C -0.153676000 2.672118000 -2.188896000

C 1.228716000 2.457634000 -1.931114000

C 1.532090000 3.024162000 -0.664460000

C 3.512296000 -1.246669000 -0.084404000

C 3.200799000 -2.311536000 0.830709000

C 2.969214000 -1.759308000 2.114079000

C 3.152870000 -0.343114000 2.028964000

C 3.490927000 -0.028050000 0.685420000

C -3.786317000 -0.908018000 -0.061526000

C -3.321849000 -2.261947000 0.063410000

C -2.910234000 -2.486311000 1.405468000

C -3.120388000 -1.276392000 2.136307000

C -3.658186000 -0.314891000 1.241890000

H 3.638685000 -0.153288000 -2.616009000

H 5.433294000 -1.648666000 -2.054193000

H 3.255840000 -2.544828000 -2.515534000

H 3.099181000 -3.361196000 0.571080000

H 2.664333000 -2.311505000 2.998826000

H 3.018648000 0.366979000 2.839356000

H 3.698490000 0.963249000 0.297667000

H 1.257779000 4.101005000 2.436292000

H 0.345002000 6.009234000 1.288499000

H -1.142058000 4.312689000 2.117423000

H 2.507232000 3.021261000 -0.186453000

H 1.923940000 1.919407000 -2.567727000

H -0.703808000 2.326737000 -3.059358000

H -1.745792000 3.673229000 -0.974964000

H -3.265005000 -2.988766000 -0.741931000

H -2.467466000 -3.397351000 1.792474000

H -2.871327000 -1.108055000 3.179989000

H -3.880309000 0.719786000 1.484452000

H -4.452659000 1.415334000 -1.371773000

H -5.810823000 -0.500430000 -1.914737000

H -3.577975000 -0.361718000 -2.778653000

**3m**

Ti 0.339941000 1.665888000 -0.555477000

Ti 1.392237000 -0.834701000 -0.074872000

Ti -1.548132000 -0.510270000 -0.401554000

Si -1.063667000 3.014933000 2.629602000

Si 5.070829000 -0.712931000 -0.198014000

Si -2.830964000 -3.623199000 0.970628000

N -0.090055000 0.155497000 0.586766000

C -0.356440000 3.405658000 0.943718000

C -1.070993000 3.601229000 -0.285815000

C -0.142915000 3.901430000 -1.321361000

C 1.165895000 3.910474000 -0.746536000

C 1.033944000 3.604910000 0.635301000

C 3.583626000 -1.666615000 0.417223000

C 2.889919000 -2.729977000 -0.239180000

C 1.791537000 -3.142676000 0.565983000

C 1.794935000 -2.348904000 1.746757000

C 2.876921000 -1.432932000 1.647847000

C -3.226979000 -1.944341000 0.258543000

C -3.521969000 -1.635870000 -1.121379000

C -3.815882000 -0.252538000 -1.238233000

C -3.706738000 0.334751000 0.051558000

C -3.351448000 -0.695588000 0.974571000

N 1.987849000 0.702856000 -0.925133000

H 2.544028000 0.890532000 -1.778867000

C 0.069053000 -1.561480000 -1.649430000

H 0.319546000 -2.459835000 -2.227996000

C -0.708281000 -0.550970000 -2.428020000

H -1.277980000 -0.925118000 -3.289028000

C -0.814478000 0.822131000 -2.049505000

H -1.496500000 1.408225000 -2.677926000

H -0.642579000 -2.108036000 -0.819629000

H -1.375937000 4.268070000 3.372047000

H -2.328406000 2.245636000 2.499544000

H -0.083225000 2.242262000 3.433217000

H -2.144433000 3.505046000 -0.417594000

H -0.386986000 4.076491000 -2.364728000

H 2.098217000 4.086991000 -1.274883000

H 1.856917000 3.489859000 1.335789000

H -3.177207000 -0.557296000 2.037831000

H -1.926011000 -3.484212000 2.142344000

H -4.054062000 -4.339465000 1.429461000

H -2.172991000 -4.466660000 -0.062963000

H -3.487502000 -2.344482000 -1.944072000

H -4.025981000 0.276802000 -2.162018000

H -3.848738000 1.383778000 0.289971000

H 3.137212000 -3.140790000 -1.214287000

H 1.074062000 -3.919621000 0.318298000

H 1.066656000 -2.393065000 2.550414000

H 3.118825000 -0.658934000 2.371352000

H 6.329894000 -1.461283000 0.075339000

H 5.149616000 0.589711000 0.510344000

H 4.994986000 -0.488632000 -1.664806000

**TS8**

Ti 0.698491000 1.583991000 -0.517208000

Ti 1.127500000 -1.064640000 0.025170000

Ti -1.659527000 -0.151909000 -0.383715000

Si -0.250908000 3.363581000 2.602291000

Si 4.659391000 -1.817427000 -0.412335000

Si -3.301833000 -3.162156000 0.866322000

N -0.144462000 0.246602000 0.627784000

C 0.529828000 3.502541000 0.909470000

C -0.123992000 3.857095000 -0.315185000

C 0.828076000 3.844911000 -1.372418000

C 2.097325000 3.504280000 -0.816576000

C 1.914238000 3.283488000 0.574499000

C 3.064628000 -2.396985000 0.381044000

C 2.075675000 -3.265497000 -0.187978000

C 0.994484000 -3.415134000 0.732040000

C 1.282476000 -2.627157000 1.877401000

C 2.539664000 -1.989342000 1.656079000

C -3.491543000 -1.411709000 0.249428000

C -3.764275000 -0.991334000 -1.104331000

C -3.891628000 0.424281000 -1.137655000

C -3.697914000 0.914766000 0.181129000

C -3.454611000 -0.200760000 1.035189000

N 1.954009000 0.231653000 -0.958576000

H 1.087869000 -0.585027000 -1.707439000

C -0.174352000 -1.315261000 -1.824210000

H -0.175811000 -2.246221000 -2.396600000

C -0.874144000 -0.182713000 -2.441478000

H -1.516269000 -0.407558000 -3.299240000

C -0.770600000 1.159749000 -1.923154000

H -1.322999000 1.907916000 -2.500058000

H -0.768776000 -1.759978000 -0.758625000

H -0.182755000 4.661909000 3.329875000

H -1.686324000 2.997752000 2.477168000

H 0.457293000 2.348315000 3.422564000

H -1.186591000 4.051244000 -0.429033000

H 0.621856000 4.044320000 -2.419370000

H 3.024085000 3.372976000 -1.366151000

H 2.688475000 2.968668000 1.269179000

H -3.241496000 -0.145215000 2.098890000

H -2.416785000 -3.194297000 2.059954000

H -4.609725000 -3.758574000 1.258645000

H -2.721851000 -4.019315000 -0.202683000

H -3.838789000 -1.651742000 -1.963887000

H -4.052479000 1.029329000 -2.024223000

H -3.691643000 1.958741000 0.479369000

H 2.138649000 -3.736180000 -1.165677000

H 0.096134000 -4.003744000 0.571606000

H 0.640175000 -2.491883000 2.741914000

H 3.020447000 -1.294262000 2.340145000

H 5.766508000 -2.763011000 -0.090932000

H 5.034667000 -0.483734000 0.117524000

H 4.513974000 -1.779240000 -1.888468000

**I**

Ti 0.696142000 1.541119000 -0.604416000

Ti 1.187469000 -1.058531000 -0.086518000

Ti -1.708445000 -0.127269000 -0.393844000

Si -0.032830000 3.073476000 2.698377000

Si 4.752393000 -1.669244000 -0.379821000

Si -3.317040000 -3.134921000 0.874375000

N -0.138788000 0.166707000 0.545604000

C 0.588147000 3.356044000 0.958729000

C -0.185985000 3.768506000 -0.175159000

C 0.667042000 3.863911000 -1.308867000

C 1.992547000 3.538706000 -0.889402000

C 1.944492000 3.221611000 0.492395000

C 3.156575000 -2.315711000 0.359078000

C 2.226351000 -3.227176000 -0.237090000

C 1.115615000 -3.416024000 0.646483000

C 1.328080000 -2.606096000 1.790466000

C 2.562155000 -1.910214000 1.604455000

C -3.506527000 -1.348496000 0.372140000

C -3.912005000 -0.841449000 -0.918229000

C -3.984453000 0.578034000 -0.860422000

C -3.628582000 0.982590000 0.453224000

C -3.336012000 -0.186155000 1.213785000

N 2.015439000 0.270883000 -0.906680000

H 0.578503000 -1.304859000 -2.108106000

C -0.539691000 -1.379443000 -2.102089000

H -0.829125000 -2.260819000 -2.682453000

C -1.187246000 -0.114229000 -2.525236000

H -1.974773000 -0.235029000 -3.274597000

C -0.875169000 1.166827000 -1.963173000

H -1.411801000 1.992676000 -2.442554000

H -0.850190000 -1.775001000 -0.979683000

H 0.092718000 4.311871000 3.517856000

H -1.471674000 2.700538000 2.676372000

H 0.751549000 2.008325000 3.373489000

H -1.260584000 3.926386000 -0.180498000

H 0.362769000 4.127687000 -2.317127000

H 2.870999000 3.481688000 -1.524714000

H 2.787966000 2.888804000 1.090429000

H -3.001515000 -0.198708000 2.246668000

H -2.364365000 -3.247281000 2.009173000

H -4.609874000 -3.738382000 1.302898000

H -2.811349000 -3.938680000 -0.272887000

H -4.116595000 -1.447599000 -1.796593000

H -4.216990000 1.239244000 -1.689126000

H -3.544446000 2.006605000 0.804048000

H 2.351962000 -3.712203000 -1.202604000

H 0.254261000 -4.052485000 0.464124000

H 0.648589000 -2.486668000 2.628224000

H 2.988278000 -1.189583000 2.297901000

H 5.880583000 -2.579959000 -0.030419000

H 5.062384000 -0.329743000 0.175021000

H 4.655184000 -1.624734000 -1.859779000

**H**

Ti 0.921013000 -1.667312000 -0.275661000

Ti -1.505698000 -0.656874000 -0.568922000

Ti 0.546275000 1.066991000 0.617183000

Si 3.793256000 0.079548000 0.797429000

Si -4.726080000 -0.567054000 1.372668000

Si 1.906301000 3.399465000 -1.864264000

N 0.327940000 0.063816000 -0.927947000

N -0.725489000 -2.298074000 -0.499354000

C -1.022367000 0.000620000 1.386699000

H -1.663718000 0.382768000 2.194260000

C 0.251135000 -0.737804000 1.773179000

C 0.095936000 -1.938659000 2.718172000

H -0.477750000 -2.727055000 2.213312000

H -0.458904000 -1.650977000 3.626819000

H 1.066215000 -2.350824000 3.029509000

C 3.357795000 -1.502815000 -0.033960000

C 2.932175000 -2.702503000 0.642884000

C 2.397067000 -3.599493000 -0.313108000

C 2.456534000 -2.963722000 -1.591824000

C 3.056037000 -1.686570000 -1.423031000

C -3.889774000 -0.311795000 -0.277949000

C -3.375681000 0.929216000 -0.792660000

C -2.839850000 0.708937000 -2.085775000

C -3.017983000 -0.673750000 -2.401254000

C -3.676168000 -1.292458000 -1.305406000

C 0.954505000 3.231755000 -0.260589000

C -0.463539000 3.032771000 -0.148995000

C -0.814597000 2.926053000 1.227362000

C 0.378951000 3.071915000 1.991890000

C 1.456375000 3.260771000 1.084360000

H 0.982054000 -0.017687000 2.314670000

H 0.455148000 3.020328000 3.074383000

H -1.810310000 2.768608000 1.624449000

H -1.146896000 2.941223000 -0.986113000

H 2.329932000 4.810910000 -2.078289000

H 1.035020000 2.990982000 -2.992423000

H 3.137570000 2.566536000 -1.847795000

H 2.497534000 3.391237000 1.366210000

H 3.206779000 -0.951215000 -2.207622000

H 2.107087000 -3.388046000 -2.528246000

H 1.984146000 -4.583052000 -0.111930000

H 3.012770000 -2.885465000 1.710479000

H 4.755795000 0.925013000 0.052269000

H 4.233345000 -0.121708000 2.198901000

H 2.572088000 0.983883000 0.925166000

H -2.686716000 -1.170643000 -3.308498000

H -2.351112000 1.444345000 -2.717976000

H -3.374616000 1.873212000 -0.255990000

H -3.916947000 -2.348768000 -1.232982000

H -6.209514000 -0.508220000 1.242946000

H -4.379466000 -1.890107000 1.952616000

H -4.319658000 0.510572000 2.314147000

**TS7**

Ti 0.261850000 1.859844000 0.302924000

Ti -1.591229000 0.005442000 0.170031000

Ti 1.169979000 -0.900272000 -0.451531000

Si 3.718301000 1.009573000 0.533889000

Si -4.990831000 1.062379000 -0.578391000

Si 1.145739000 -3.826526000 1.824232000

N 0.256465000 0.017574000 0.904142000

N -1.529558000 1.808285000 0.236419000

C -0.443733000 -0.368301000 -1.663139000

H -0.761507000 -0.863933000 -2.592699000

C 0.291993000 0.848968000 -1.702722000

C 0.434080000 1.615726000 -3.011276000

H -0.434269000 2.284866000 -3.104319000

H 0.433739000 0.944161000 -3.884579000

H 1.337650000 2.236408000 -3.043630000

C 2.591107000 2.464974000 0.695721000

C 2.105495000 3.294254000 -0.374200000

C 1.081906000 4.138275000 0.128729000

C 0.902851000 3.835958000 1.512257000

C 1.826719000 2.813323000 1.859670000

C -3.943438000 -0.303869000 0.159663000

C -3.407804000 -1.463430000 -0.498336000

C -2.655366000 -2.221614000 0.440492000

C -2.684193000 -1.534857000 1.684642000

C -3.474577000 -0.361759000 1.516557000

C 1.537706000 -3.162031000 0.116657000

C 0.697924000 -3.148481000 -1.048434000

C 1.430351000 -2.619521000 -2.145436000

C 2.732820000 -2.279308000 -1.684602000

C 2.799464000 -2.617717000 -0.300757000

H 1.890209000 0.329799000 -1.498219000

H 3.528445000 -1.839795000 -2.276895000

H 1.048472000 -2.462509000 -3.148557000

H -0.336452000 -3.471172000 -1.088487000

H 1.570766000 -5.249117000 1.931640000

H -0.313722000 -3.767341000 2.084652000

H 1.877972000 -3.047949000 2.854107000

H 3.667778000 -2.491583000 0.338521000

H 1.913333000 2.345724000 2.836444000

H 0.177366000 4.296174000 2.176113000

H 0.513692000 4.868577000 -0.439875000

H 2.470066000 3.275697000 -1.396351000

H 4.568812000 0.823519000 1.739851000

H 4.567772000 1.068287000 -0.678709000

H 2.933122000 -0.285121000 0.481865000

H -2.172884000 -1.836071000 2.593699000

H -2.128980000 -3.148249000 0.240116000

H -3.552565000 -1.719574000 -1.544383000

H -3.663507000 0.390799000 2.276398000

H -6.399598000 0.603194000 -0.743192000

H -4.987239000 2.236161000 0.327441000

H -4.494785000 1.448215000 -1.925321000

**TS9**

Ti -0.183032000 1.495155000 0.363934000

H 1.649959000 1.366139000 0.208603000

Ti -1.177961000 -1.048319000 -0.096029000

Ti 1.527048000 -0.382550000 -0.446353000

Si -1.778740000 4.159829000 -1.549595000

Si -4.241730000 -2.554353000 1.239578000

Si 4.900060000 -0.447030000 1.230097000

N 0.530095000 -2.038406000 0.066379000

N -0.073449000 0.373730000 -1.080739000

C 0.431724000 -0.178887000 1.568762000

H 0.560714000 0.163250000 2.603332000

C 0.639276000 -1.570114000 1.370996000

C 1.043062000 -2.540802000 2.472022000

H 1.123480000 -2.036874000 3.442940000

H 2.006383000 -3.009051000 2.229414000

H 0.296217000 -3.342307000 2.546175000

C -1.189008000 3.586388000 0.132204000

C 0.111283000 3.801140000 0.711931000

C 0.124210000 3.256155000 2.028615000

C -1.151289000 2.685883000 2.281866000

C -1.957477000 2.877037000 1.124381000

C -3.238003000 -2.168906000 -0.286994000

C -2.229878000 -2.985600000 -0.900359000

C -1.711857000 -2.311926000 -2.041383000

C -2.394074000 -1.070616000 -2.162050000

C -3.317564000 -0.969130000 -1.091245000

C 3.924741000 -0.568480000 -0.362144000

C 3.425905000 -1.762864000 -0.984000000

C 2.775537000 -1.415879000 -2.195355000

C 2.878393000 -0.000330000 -2.364699000

C 3.585743000 0.517880000 -1.249253000

H -4.734240000 -1.293711000 1.852933000

H -5.434128000 -3.390338000 0.912913000

H -3.430716000 -3.315232000 2.226404000

H -1.873687000 -3.939794000 -0.522945000

H -0.897127000 -2.659175000 -2.668022000

H -2.182818000 -0.298667000 -2.893915000

H -3.963156000 -0.119526000 -0.889397000

H -2.822790000 3.238234000 -2.066721000

H -2.369426000 5.523912000 -1.469625000

H -0.636976000 4.209820000 -2.498898000

H -2.988366000 2.554894000 1.014637000

H -1.450222000 2.155808000 3.181224000

H 0.979339000 3.238451000 2.698191000

H 0.947111000 4.296950000 0.226427000

H 3.471000000 -2.762398000 -0.563052000

H 2.248615000 -2.101544000 -2.852068000

H 2.452774000 0.578559000 -3.177897000

H 3.809697000 1.564954000 -1.074267000

H 4.628043000 0.849190000 1.903127000

H 6.363465000 -0.534068000 0.973897000

H 4.528363000 -1.564469000 2.137187000

H -1.811558000 0.251136000 0.993869000

H -2.138282000 -0.689646000 1.351013000

**J**

Ti -0.031068000 1.473427000 0.449054000

H 1.756656000 1.012868000 0.361813000

Ti -1.416034000 -0.893298000 -0.052407000

Ti 1.390388000 -0.611435000 -0.431338000

Si -0.579063000 4.453009000 -1.590431000

Si -4.740949000 -1.820305000 1.126259000

Si 4.691752000 -1.290944000 1.251780000

N 0.161442000 -2.113339000 0.002634000

N -0.051437000 0.421359000 -1.040448000

C 0.307964000 -0.340207000 1.598073000

H 0.476672000 -0.063366000 2.645668000

C 0.363975000 -1.725685000 1.324114000

C 0.622672000 -2.793342000 2.375457000

H 1.037849000 -2.363124000 3.295061000

H 1.308489000 -3.554571000 1.983549000

H -0.326783000 -3.290350000 2.618906000

C -0.335981000 3.772753000 0.138946000

C 0.911794000 3.595451000 0.830340000

C 0.648717000 3.098327000 2.143279000

C -0.753400000 2.944123000 2.280227000

C -1.360197000 3.340787000 1.052746000

C -3.638695000 -1.633022000 -0.372794000

C -2.754484000 -2.614574000 -0.929037000

C -2.051238000 -2.045525000 -2.026938000

C -2.487672000 -0.701631000 -2.170855000

C -3.446459000 -0.439432000 -1.154619000

C 3.731365000 -1.150629000 -0.348639000

C 3.072997000 -2.209630000 -1.061344000

C 2.499543000 -1.682497000 -2.245758000

C 2.812246000 -0.288579000 -2.308295000

C 3.570696000 0.036021000 -1.154580000

H -4.949914000 -0.507749000 1.786192000

H -6.086658000 -2.332710000 0.725326000

H -4.168067000 -2.805754000 2.077937000

H -2.596749000 -3.615437000 -0.536927000

H -1.275169000 -2.534498000 -2.605747000

H -2.098661000 0.021654000 -2.878795000

H -3.934746000 0.513690000 -0.976548000

H -1.792589000 3.859599000 -2.206365000

H -0.753810000 5.930562000 -1.553544000

H 0.612701000 4.151101000 -2.423921000

H -2.425375000 3.317884000 0.844440000

H -1.275554000 2.535659000 3.139971000

H 1.399886000 2.841587000 2.884545000

H 1.896386000 3.807838000 0.423994000

H 2.964142000 -3.232776000 -0.715672000

H 1.888514000 -2.232100000 -2.955476000

H 2.488977000 0.404404000 -3.078215000

H 3.946493000 1.022165000 -0.902128000

H 4.589759000 -0.025320000 2.023614000

H 6.132834000 -1.555911000 0.992477000

H 4.157158000 -2.413468000 2.065406000

H -1.702644000 0.755930000 0.704040000

H -2.279545000 -0.876120000 1.439839000

**TS10**

Ti -0.318289000 1.392657000 0.395228000

H 1.470050000 1.062038000 0.682830000

Ti -1.135675000 -1.138185000 -0.184319000

Ti 1.596355000 -0.367470000 -0.513511000

Si -1.890259000 4.055685000 -1.540504000

Si -4.296129000 -2.144831000 1.360116000

Si 4.779684000 -0.472799000 1.491767000

N 0.656935000 -2.015428000 -0.312493000

N 0.003533000 0.471751000 -1.123283000

C -0.065049000 -0.588813000 1.543640000

H 0.014781000 -0.371734000 2.612129000

C 0.735418000 -1.716042000 1.075364000

C 1.172252000 -2.819731000 2.025735000

H 1.522424000 -2.403776000 2.980264000

H 1.978229000 -3.410877000 1.574742000

H 0.331511000 -3.500154000 2.238813000

C -1.234692000 3.528391000 0.133668000

C 0.105520000 3.696330000 0.622080000

C 0.182266000 3.194464000 1.953028000

C -1.104513000 2.707110000 2.313243000

C -1.972669000 2.902118000 1.202203000

C -3.289672000 -2.095937000 -0.214859000

C -2.350253000 -3.080738000 -0.675350000

C -1.777389000 -2.649519000 -1.904207000

C -2.341798000 -1.384668000 -2.222981000

C -3.266870000 -1.043354000 -1.194097000

C 3.981818000 -0.379154000 -0.196810000

C 3.654071000 -1.476432000 -1.064679000

C 3.090835000 -0.965333000 -2.260077000

C 3.087100000 0.463625000 -2.175189000

C 3.637278000 0.821342000 -0.919162000

H -4.491345000 -0.772973000 1.895578000

H -5.647093000 -2.728833000 1.118521000

H -3.615648000 -2.994888000 2.371031000

H -2.080822000 -3.989834000 -0.143824000

H -0.999266000 -3.163218000 -2.457377000

H -2.072052000 -0.757467000 -3.066208000

H -3.842033000 -0.124423000 -1.145474000

H -2.918369000 3.098060000 -2.021855000

H -2.524173000 5.400171000 -1.455573000

H -0.770598000 4.131587000 -2.512422000

H -3.021714000 2.626283000 1.167673000

H -1.371984000 2.235608000 3.254246000

H 1.077044000 3.158844000 2.566845000

H 0.935327000 4.112873000 0.057398000

H 3.747902000 -2.528969000 -0.816151000

H 2.692130000 -1.556515000 -3.079425000

H 2.691713000 1.146003000 -2.920755000

H 3.742543000 1.832984000 -0.539857000

H 4.305749000 0.642395000 2.352292000

H 6.262229000 -0.370396000 1.393988000

H 4.456902000 -1.771189000 2.137983000

H -1.872716000 0.502313000 0.306097000

H -1.524631000 -1.026951000 1.547586000

**K**

Ti 0.103746000 1.304742000 0.461058000

H 1.803747000 0.896865000 0.015588000

Ti -1.465527000 -1.048581000 -0.248044000

Ti 1.340013000 -0.910987000 -0.144840000

Si -0.680596000 3.911087000 -1.928784000

Si -4.748002000 -0.506915000 1.348612000

Si 4.728142000 0.483382000 -0.100038000

N -0.256431000 -1.985937000 0.777170000

N -0.193915000 0.143485000 -0.945385000

C 0.847999000 -0.290332000 2.034122000

H 1.695722000 -0.012285000 2.671951000

C 0.704878000 -1.743925000 1.721554000

C 1.290992000 -2.841791000 2.587075000

H 2.251997000 -2.538152000 3.025610000

H 1.437358000 -3.765120000 2.011391000

H 0.606538000 -3.071327000 3.420458000

C -0.200417000 3.510048000 -0.161889000

C 1.133692000 3.399353000 0.360889000

C 1.066067000 3.113097000 1.757983000

C -0.304482000 3.038838000 2.121923000

C -1.084218000 3.267709000 0.952474000

C -3.854689000 -1.086985000 -0.188763000

C -3.368816000 -2.405308000 -0.485105000

C -2.710913000 -2.373630000 -1.749355000

C -2.824763000 -1.046065000 -2.272198000

C -3.519593000 -0.263950000 -1.324636000

C 3.624199000 -0.923092000 -0.648982000

C 3.364844000 -2.143763000 0.056505000

C 2.475572000 -2.946221000 -0.701382000

C 2.181150000 -2.243593000 -1.911722000

C 2.873845000 -1.000197000 -1.884347000

H -4.769799000 0.979023000 1.366729000

H -6.156534000 -0.990654000 1.374360000

H -4.085244000 -1.005771000 2.582424000

H -3.442384000 -3.271831000 0.165185000

H -2.225031000 -3.214551000 -2.236138000

H -2.394698000 -0.689525000 -3.203794000

H -3.715689000 0.801216000 -1.406003000

H -1.977982000 3.274137000 -2.262772000

H -0.833434000 5.382890000 -2.096343000

H 0.379735000 3.445175000 -2.855913000

H -2.168404000 3.241952000 0.903164000

H -0.695005000 2.797769000 3.107235000

H 1.915058000 2.938810000 2.411898000

H 2.047415000 3.503770000 -0.214317000

H 3.757407000 -2.402195000 1.035925000

H 2.054427000 -3.896431000 -0.390266000

H 1.493267000 -2.570480000 -2.685407000

H 2.825997000 -0.227208000 -2.644705000

H 4.408261000 1.709436000 -0.873588000

H 6.164323000 0.157679000 -0.327733000

H 4.564161000 0.751761000 1.354715000

H -1.574335000 0.403149000 0.929607000

H -0.101246000 0.128318000 2.436481000

**TS11**

Ti 1.061463000 -1.306702000 0.628550000

H -0.811296000 -1.746807000 0.820481000

Ti 0.598324000 1.379281000 -0.009215000

Ti -1.523232000 -0.384260000 -0.192407000

Si 2.429766000 -3.290357000 -2.053559000

Si 3.377799000 3.769187000 -0.387230000

Si -4.987537000 0.213756000 0.854211000

N -1.179126000 0.960624000 1.026589000

N 0.241021000 -0.445884000 -0.808343000

C 0.488362000 -0.143408000 2.437491000

H -0.192341000 -0.851408000 2.944881000

C -0.270619000 1.141289000 2.080047000

C -0.687763000 2.103086000 3.200328000

H -1.466267000 1.622185000 3.810991000

H -1.098526000 3.032428000 2.785460000

H 0.160677000 2.344987000 3.854544000

C 2.373390000 -3.019489000 -0.201265000

C 1.456926000 -3.617879000 0.733574000

C 1.771819000 -3.166289000 2.047033000

C 2.871565000 -2.275306000 1.952180000

C 3.239874000 -2.174550000 0.579526000

C 1.653768000 3.277674000 -0.925772000

C 0.408858000 3.718723000 -0.339093000

C -0.671815000 3.143740000 -1.055696000

C -0.130838000 2.308892000 -2.069245000

C 1.292218000 2.392225000 -1.992540000

C -3.869465000 -0.610768000 -0.398126000

C -3.358005000 -0.023711000 -1.611420000

C -2.584928000 -0.999124000 -2.310851000

C -2.576506000 -2.185040000 -1.537212000

C -3.345954000 -1.946984000 -0.361152000

H 4.317097000 2.628711000 -0.533318000

H 3.892908000 4.889753000 -1.224718000

H 3.345969000 4.231690000 1.023479000

H 0.320710000 4.375735000 0.521534000

H -1.722980000 3.256789000 -0.814077000

H -0.690419000 1.694916000 -2.766551000

H 1.986615000 1.832274000 -2.612769000

H 2.940299000 -2.076240000 -2.737430000

H 3.338259000 -4.421964000 -2.389594000

H 1.075296000 -3.632807000 -2.558145000

H 4.039521000 -1.554420000 0.186618000

H 3.319860000 -1.722796000 2.771647000

H 1.227062000 -3.415602000 2.952692000

H 0.644173000 -4.291476000 0.477395000

H -3.555149000 0.990951000 -1.949045000

H -2.049906000 -0.842461000 -3.242523000

H -2.026649000 -3.092395000 -1.766131000

H -3.504696000 -2.663807000 0.439708000

H -4.837032000 1.688545000 0.766994000

H -4.664112000 -0.248716000 2.228871000

H -6.415645000 -0.118156000 0.591620000

H 1.343981000 0.071123000 3.098552000

H 2.031304000 0.234961000 0.499034000

H 0.906727000 1.863378000 1.668125000

H 1.861380000 1.939748000 1.076780000

**L**

Ti -0.101867000 1.359991000 0.265582000

H 1.416319000 0.633207000 -0.589505000

Ti -1.498767000 -0.839002000 -0.739069000

Ti 1.183659000 -1.218323000 -0.586350000

Si 2.204387000 3.024527000 -2.073300000

Si -4.502737000 0.484477000 1.199299000

Si 4.191326000 -0.250565000 1.671965000

N -0.153222000 -0.829212000 0.747749000

N -0.140721000 -1.525823000 -1.734990000

C -0.183145000 0.924477000 2.343427000

H 0.890717000 1.105599000 2.574689000

C -0.455087000 -0.568722000 2.191516000

C 0.324917000 -1.509111000 3.120177000

H 1.404990000 -1.330213000 3.039234000

H 0.124425000 -2.563664000 2.877449000

H 0.025496000 -1.327917000 4.162516000

C 0.801545000 3.223164000 -0.847455000

C 0.914809000 3.449599000 0.567031000

C -0.384302000 3.538316000 1.134309000

C -1.330595000 3.354643000 0.085117000

C -0.603863000 3.173930000 -1.128884000

C -3.833571000 -0.777722000 -0.008359000

C -3.273735000 -2.063473000 0.290582000

C -2.942962000 -2.721244000 -0.932676000

C -3.273091000 -1.847637000 -2.001471000

C -3.794423000 -0.647344000 -1.439916000

C 3.462557000 -1.386903000 0.377829000

C 2.755311000 -2.611077000 0.608096000

C 2.436268000 -3.208340000 -0.647794000

C 2.955854000 -2.367726000 -1.676077000

C 3.558879000 -1.244613000 -1.051238000

H -4.452201000 1.843289000 0.602324000

H -5.929457000 0.188032000 1.513402000

H -3.752496000 0.457432000 2.480162000

H -3.132684000 -2.476484000 1.285822000

H -2.470645000 -3.693712000 -1.028793000

H -3.083972000 -2.033262000 -3.054004000

H -4.119817000 0.225147000 -2.000158000

H 1.839535000 2.060503000 -3.139839000

H 2.511048000 4.330817000 -2.721453000

H 3.429698000 2.571401000 -1.366891000

H -1.043940000 3.003023000 -2.105135000

H -2.409363000 3.346359000 0.189657000

H -0.614404000 3.691939000 2.181964000

H 1.849025000 3.492817000 1.121504000

H 2.499925000 -3.019266000 1.580852000

H 1.889700000 -4.134556000 -0.797813000

H 2.847674000 -2.528344000 -2.744053000

H 4.017421000 -0.407086000 -1.569836000

H 5.669099000 -0.168195000 1.521768000

H 3.884223000 -0.793074000 3.020493000

H 3.657350000 1.134812000 1.581857000

H -0.803923000 1.434472000 3.087547000

H -0.892145000 0.791364000 -1.298906000

H -1.531524000 -0.744034000 2.337369000

H -1.802885000 0.856733000 0.408109000

**TS12**

Ti -0.102570000 1.366727000 0.520908000

H 1.703076000 0.682493000 0.338859000

Ti -1.486673000 -0.574747000 -0.711807000

Ti 1.267265000 -0.844073000 -0.472437000

Si 1.258871000 3.158504000 -2.376450000

Si -4.702247000 -0.185924000 1.243480000

Si 4.555360000 -0.633078000 1.326514000

N -0.218666000 -0.930888000 0.770266000

N 0.033967000 -0.143515000 -1.617672000

C -0.063965000 0.468547000 2.656229000

H 1.022542000 0.572693000 2.806925000

C -0.423350000 -0.965030000 2.247417000

C 0.384392000 -2.062959000 2.947892000

H 1.461791000 -1.882033000 2.836095000

H 0.148994000 -3.053770000 2.531153000

H 0.149416000 -2.073160000 4.021892000

C 0.560677000 3.281541000 -0.642398000

C 1.293313000 3.247061000 0.591081000

C 0.383847000 3.334015000 1.678981000

C -0.940600000 3.427368000 1.139199000

C -0.823895000 3.407928000 -0.284743000

C -3.809481000 -1.036622000 -0.165968000

C -3.088467000 -2.271249000 -0.125233000

C -2.576951000 -2.552373000 -1.428049000

C -2.992518000 -1.505217000 -2.301253000

C -3.724701000 -0.564804000 -1.526749000

C 3.538485000 -1.520959000 0.030317000

C 2.695316000 -2.667031000 0.200112000

C 2.106514000 -2.996268000 -1.056131000

C 2.603336000 -2.080784000 -2.031451000

C 3.462495000 -1.170100000 -1.366859000

H -4.760986000 1.277209000 1.003411000

H -6.100298000 -0.689371000 1.353329000

H -4.023768000 -0.466135000 2.535061000

H -2.926127000 -2.882427000 0.758005000

H -1.970160000 -3.410411000 -1.703755000

H -2.737515000 -1.411007000 -3.352368000

H -4.149013000 0.364721000 -1.895928000

H 0.218176000 2.679845000 -3.317322000

H 1.709786000 4.503399000 -2.836049000

H 2.441666000 2.260637000 -2.403995000

H -1.651628000 3.446589000 -0.984764000

H -1.859665000 3.524884000 1.705455000

H 0.643058000 3.307409000 2.731977000

H 2.367881000 3.117884000 0.678171000

H 2.513178000 -3.190789000 1.132663000

H 1.405777000 -3.806153000 -1.239468000

H 2.317658000 -2.044377000 -3.077818000

H 3.957070000 -0.318708000 -1.826845000

H 5.832536000 -1.351991000 1.589802000

H 3.817831000 -0.548206000 2.614319000

H 4.883080000 0.733160000 0.846030000

H -0.584743000 0.825455000 3.552857000

H -1.793658000 1.091219000 -0.154241000

H -1.495725000 -1.135452000 2.435797000

H -1.238286000 1.151866000 1.762003000

**8m**

Ti -0.653996000 1.723755000 -0.400690000

H -1.475391000 0.244978000 0.434540000

H 0.977354000 1.535699000 0.587883000

Ti 1.751880000 0.174877000 -0.413084000

Ti -0.700626000 -1.107498000 -0.570687000

Si -3.139710000 2.199607000 2.388492000

Si 4.761362000 -0.386032000 1.766633000

Si -3.667070000 -2.899663000 0.804194000

N 0.247661000 0.459810000 -1.465072000

N 1.030558000 -1.303195000 0.408561000

C 0.515744000 -2.239458000 1.380756000

C 1.165103000 -3.631673000 1.247021000

H 0.693735000 -4.350076000 1.932003000

H 2.232491000 -3.557646000 1.493338000

H 1.073725000 -4.005982000 0.219793000

C 0.608168000 -1.680729000 2.816140000

H 1.663022000 -1.557922000 3.094681000

H 0.132483000 -2.367584000 3.530389000

H 0.113754000 -0.704223000 2.872528000

C -2.254620000 2.950431000 0.919612000

C -1.032472000 3.695846000 0.935656000

C -0.700356000 4.080004000 -0.392898000

C -1.721396000 3.581088000 -1.262879000

C -2.675037000 2.885223000 -0.456788000

C 4.090930000 0.246125000 0.142216000

C 3.684847000 1.590475000 -0.170526000

C 3.306897000 1.658840000 -1.539067000

C 3.441282000 0.356738000 -2.093848000

C 3.921786000 -0.509445000 -1.067695000

C -2.671518000 -2.393351000 -0.692390000

C -2.912510000 -1.245313000 -1.533377000

C -2.003811000 -1.262835000 -2.616375000

C -1.169845000 -2.410631000 -2.473814000

C -1.587712000 -3.119903000 -1.310114000

H -0.599257000 -2.378446000 1.184507000

H 4.571400000 -1.857749000 1.852146000

H 6.218739000 -0.107416000 1.894528000

H 4.078382000 0.269039000 2.912981000

H 4.112642000 -1.573370000 -1.176925000

H 3.186776000 0.065894000 -3.108497000

H 2.919678000 2.532676000 -2.053455000

H 3.661141000 2.419621000 0.530391000

H -1.161799000 -4.051739000 -0.948431000

H -4.767329000 -3.834372000 0.435991000

H -4.271297000 -1.707059000 1.448796000

H -2.798836000 -3.606853000 1.785038000

H -3.649014000 -0.472546000 -1.336628000

H -1.894440000 -0.493905000 -3.373229000

H -0.346614000 -2.682843000 -3.128323000

H -2.168865000 1.650505000 3.369489000

H -4.059568000 1.130209000 1.928001000

H -3.952877000 3.231605000 3.091967000

H -0.424991000 3.892211000 1.814424000

H 0.184232000 4.633994000 -0.694759000

H -1.762148000 3.709260000 -2.341202000

H -3.571348000 2.389446000 -0.818492000

**A'**

Ti -0.369079000 1.286355000 -0.555517000

Ti 1.599070000 -0.368283000 0.441423000

Ti -0.850608000 -1.351612000 -0.111634000

Si -0.439377000 4.078925000 1.743728000

Si 4.109759000 -0.340812000 -2.236236000

Si -4.492676000 -0.470782000 -0.470421000

C -0.292411000 0.436717000 1.169581000

C 0.318927000 -0.440603000 2.012449000

C 0.194890000 -0.780509000 3.470289000

H 0.595943000 0.053322000 4.067962000

H 0.762027000 -1.682500000 3.736172000

H -0.852002000 -0.920163000 3.781028000

C -0.746294000 3.520933000 -0.014353000

C -1.977486000 2.993733000 -0.535438000

C -1.797087000 2.657517000 -1.907415000

C -0.454308000 2.967098000 -2.264843000

C 0.190850000 3.491820000 -1.107405000

C 3.768655000 -0.588053000 -0.413528000

C 3.779338000 0.427313000 0.610343000

C 3.482887000 -0.172160000 1.866508000

C 3.273303000 -1.562293000 1.648104000

C 3.454845000 -1.817219000 0.259605000

C -3.214241000 -1.679483000 0.171390000

C -2.587161000 -1.661461000 1.454912000

C -1.677067000 -2.758302000 1.547153000

C -1.728974000 -3.471453000 0.312187000

C -2.679018000 -2.811537000 -0.526224000

H 0.868897000 -2.008227000 -0.006950000

H -1.583547000 0.012276000 -1.088498000

H 0.530332000 -0.292243000 -1.161808000

H 1.452997000 1.291189000 -0.378738000

H 5.546477000 -0.582619000 -2.549087000

H 3.788645000 1.056291000 -2.623084000

H 3.306586000 -1.291390000 -3.046749000

H 3.962379000 1.484396000 0.443250000

H 3.392967000 0.346417000 2.816241000

H 2.991850000 -2.292771000 2.399582000

H 3.334326000 -2.783807000 -0.220057000

H -2.942346000 -3.106752000 -1.536963000

H -1.148886000 -4.352182000 0.055921000

H -1.051483000 -3.004949000 2.397203000

H -2.741592000 -0.901772000 2.213607000

H -5.862919000 -1.001103000 -0.223648000

H -4.372894000 0.825422000 0.240816000

H -4.341499000 -0.272604000 -1.933725000

H 0.928228000 3.707013000 2.189961000

H -1.453119000 3.474910000 2.644267000

H -0.551244000 5.561685000 1.859235000

H -2.884850000 2.834953000 0.039062000

H -2.542727000 2.206157000 -2.554570000

H 0.005834000 2.804383000 -3.234923000

H 1.229344000 3.803626000 -1.054956000

N -0.476758000 -2.181881000 -2.020259000

N -0.246087000 -2.630412000 -3.028798000

**TS1'**

Ti -0.252023000 1.343209000 -0.501005000

Ti 1.541756000 -0.586222000 0.420873000

Ti -1.071269000 -1.168231000 0.136144000

Si -0.597552000 4.083053000 1.837538000

Si 3.870625000 -0.771095000 -2.402066000

Si -4.372446000 -0.799845000 -1.404748000

C 0.027818000 0.641721000 1.282560000

C 0.412113000 -0.376988000 2.105687000

C 0.329965000 -0.659329000 3.579135000

H 1.102705000 -0.074976000 4.104133000

H 0.515835000 -1.718449000 3.802028000

H -0.640645000 -0.371355000 4.012142000

C -0.485946000 3.586821000 0.036940000

C -1.575432000 3.233251000 -0.839593000

C -1.051953000 2.913428000 -2.125260000

C 0.362431000 3.040923000 -2.065562000

C 0.712962000 3.456535000 -0.746107000

C 3.645155000 -0.943989000 -0.552894000

C 3.781733000 0.114794000 0.420528000

C 3.539272000 -0.416193000 1.715028000

C 3.247515000 -1.804595000 1.575359000

C 3.320826000 -2.127743000 0.192472000

C -3.348674000 -1.640635000 -0.079049000

C -3.108595000 -1.152448000 1.257467000

C -2.269902000 -2.078361000 1.940898000

C -1.977912000 -3.149630000 1.043296000

C -2.651194000 -2.890963000 -0.181179000

H 0.513640000 -2.101921000 0.257157000

H -1.389162000 0.546115000 0.765694000

H -1.497203000 0.101378000 -1.132001000

H 1.343777000 0.618009000 -0.960219000

H 5.212773000 -1.264767000 -2.820974000

H 3.772450000 0.662532000 -2.776357000

H 2.853856000 -1.559897000 -3.143284000

H 4.007144000 1.151862000 0.191313000

H 3.537594000 0.143996000 2.645146000

H 2.983777000 -2.485733000 2.378278000

H 3.119468000 -3.106638000 -0.233746000

H -2.610060000 -3.518643000 -1.066361000

H -1.340088000 -4.002320000 1.253611000

H -1.922185000 -1.993895000 2.963626000

H -3.515025000 -0.237381000 1.676211000

H -5.765836000 -1.328036000 -1.400989000

H -4.437134000 0.658660000 -1.137174000

H -3.795100000 -1.054195000 -2.748236000

H 0.664435000 3.743529000 2.541727000

H -1.751395000 3.413570000 2.490776000

H -0.805142000 5.554318000 1.968977000

H -2.625223000 3.201459000 -0.561338000

H -1.629205000 2.579002000 -2.982178000

H 1.059398000 2.824376000 -2.869359000

H 1.723895000 3.618102000 -0.384879000

N -0.508086000 -1.830497000 -1.763018000

N -0.286688000 -2.255287000 -2.787620000

**B'**

Ti -0.507031000 1.281182000 0.186042000

Ti 1.796857000 -0.297220000 0.408582000

Ti -0.536667000 -1.391111000 -0.340543000

Si -3.345472000 3.170273000 1.646229000

Si 4.173162000 1.395977000 -1.768378000

Si -4.266820000 -1.311988000 -0.482063000

C -0.079206000 -0.180100000 1.495013000

C 0.662555000 -1.361782000 1.660756000

C 0.712975000 -2.282237000 2.853604000

H 1.105619000 -1.744672000 3.732654000

H 1.369405000 -3.145487000 2.676478000

H -0.281493000 -2.666934000 3.132861000

C -1.992679000 3.095354000 0.353301000

C -2.108449000 2.579470000 -0.982133000

C -0.868627000 2.758035000 -1.659780000

C 0.026179000 3.416545000 -0.761729000

C -0.650259000 3.616571000 0.469627000

C 3.935421000 0.390644000 -0.211185000

C 3.693306000 0.912336000 1.112477000

C 3.568528000 -0.171751000 2.019584000

C 3.733493000 -1.382547000 1.285527000

C 3.963868000 -1.042143000 -0.074631000

C -2.715404000 -2.356047000 -0.418981000

C -2.054589000 -2.830529000 0.760044000

C -0.915047000 -3.595961000 0.373764000

C -0.854536000 -3.604019000 -1.052377000

C -1.959587000 -2.848100000 -1.535872000

H 1.261579000 -1.581152000 -0.801161000

H -1.642009000 0.073038000 -0.516543000

H 1.233151000 1.334875000 -0.210787000

H -0.688104000 0.344877000 2.276520000

H 5.614159000 1.499275000 -2.131877000

H 3.660296000 2.773296000 -1.546298000

H 3.464345000 0.779232000 -2.919416000

H 3.590844000 1.963909000 1.363137000

H 3.346254000 -0.095833000 3.079834000

H 3.663285000 -2.387304000 1.689468000

H 4.101755000 -1.751343000 -0.885578000

H -2.183127000 -2.655223000 -2.580817000

H -0.092622000 -4.084294000 -1.658152000

H -0.215790000 -4.086612000 1.040888000

H -2.360026000 -2.617785000 1.780040000

H -5.476070000 -2.177296000 -0.578694000

H -4.386320000 -0.501635000 0.755866000

H -4.255153000 -0.423901000 -1.672781000

H -2.858547000 2.655165000 2.955498000

H -4.501633000 2.355715000 1.199100000

H -3.794773000 4.572402000 1.857824000

H -2.988597000 2.096387000 -1.393895000

H -0.638242000 2.436929000 -2.670690000

H 1.055609000 3.683576000 -0.973985000

H -0.225851000 4.081385000 1.355972000

N -0.201416000 -0.714395000 -2.284573000

N -0.068193000 -0.430665000 -3.373760000

**A''**

C -0.180642000 0.460466000 1.264531000

H -1.622934000 -0.044131000 -0.663641000

Ti -0.666777000 -1.368427000 0.272007000

Si -2.716076000 2.401617000 2.087820000

Si 4.196703000 -0.574811000 -2.220325000

Si -3.794284000 -1.837803000 -1.680280000

Ti -0.403779000 1.372753000 -0.480651000

C -0.012673000 -0.653880000 2.047901000

C 0.113644000 -0.859881000 3.534715000

H 0.737126000 -0.085365000 4.007963000

H 0.541662000 -1.843594000 3.771789000

H -0.881350000 -0.812321000 4.006227000

C -1.709639000 2.946640000 0.609819000

C -2.102377000 2.954279000 -0.774648000

C -1.024260000 3.467049000 -1.557047000

C 0.060892000 3.737872000 -0.683053000

C -0.353459000 3.430008000 0.641274000

C 3.850884000 -0.329326000 -0.398279000

C 3.784760000 0.927197000 0.299801000

C 3.504784000 0.688843000 1.672273000

C 3.384585000 -0.721018000 1.860476000

C 3.603309000 -1.343283000 0.595037000

C -2.481824000 -2.622509000 -0.597497000

C -2.493337000 -2.717417000 0.838240000

C -1.322160000 -3.393668000 1.277521000

C -0.559316000 -3.717472000 0.116015000

C -1.267426000 -3.246744000 -1.029675000

H 1.118513000 -1.800480000 0.161468000

Ti 1.662510000 -0.086699000 0.413542000

H 0.455933000 -0.398651000 -1.054473000

H 1.415281000 1.430592000 -0.571096000

H 5.643233000 -0.839093000 -2.461189000

H 3.822852000 0.651968000 -2.968222000

H 3.435626000 -1.740004000 -2.739776000

H 3.894931000 1.904672000 -0.158633000

H 3.353893000 1.449626000 2.432711000

H 3.159734000 -1.226614000 2.793674000

H 3.569266000 -2.411988000 0.408528000

H -0.926726000 -3.322986000 -2.058220000

H 0.402012000 -4.220573000 0.105442000

H -1.054067000 -3.612137000 2.305256000

H -3.259134000 -2.299301000 1.487197000

H -4.810514000 -2.853660000 -2.075846000

H -4.497100000 -0.761050000 -0.938775000

H -3.187078000 -1.299056000 -2.922391000

H -1.819930000 2.203098000 3.254216000

H -3.476409000 1.157210000 1.806522000

H -3.711945000 3.450569000 2.454545000

H -3.066634000 2.635154000 -1.159735000

H -1.020367000 3.591276000 -2.634877000

H 1.044128000 4.090262000 -0.977788000

H 0.263364000 3.503272000 1.530231000

N -0.662437000 0.692957000 -3.731434000

N -0.613225000 0.939411000 -2.636323000

**TS1''**

C 0.282395000 -0.264553000 0.954780000

H 1.445481000 -0.565493000 0.258799000

Ti 1.277275000 1.246295000 -0.208294000

Si 0.609111000 -3.026477000 2.536884000

Si -4.157584000 1.499678000 -1.982986000

Si 4.654831000 -0.163784000 -0.116370000

Ti -0.088184000 -1.413152000 -0.612952000

C 0.293575000 0.969139000 1.631116000

C 0.497935000 1.314410000 3.089468000

H -0.215988000 0.780841000 3.737347000

H 0.373454000 2.391930000 3.262706000

H 1.509174000 1.037695000 3.427765000

C -0.189405000 -3.181018000 0.854179000

C 0.393393000 -3.690613000 -0.363592000

C -0.601852000 -3.675853000 -1.383288000

C -1.786029000 -3.114591000 -0.842870000

C -1.544655000 -2.815444000 0.529349000

C -3.563421000 1.478184000 -0.206202000

C -3.624825000 0.353219000 0.691437000

C -3.062294000 0.725968000 1.938369000

C -2.640519000 2.086358000 1.845160000

C -2.954760000 2.550316000 0.535996000

C 3.585252000 1.358336000 -0.336781000

C 3.172288000 2.291941000 0.683403000

C 2.408647000 3.324094000 0.082183000

C 2.336414000 3.056867000 -1.318481000

C 3.058487000 1.861387000 -1.581458000

H -0.309564000 2.034160000 -0.720428000

Ti -1.350801000 0.880235000 0.281143000

H 0.923050000 0.182461000 -1.534765000

H -1.513404000 -0.360705000 -1.052527000

H -5.450732000 2.230170000 -2.093457000

H -4.369305000 0.103047000 -2.439381000

H -3.177816000 2.181354000 -2.866477000

H -4.007190000 -0.629813000 0.435053000

H -2.925933000 0.076672000 2.798540000

H -2.155180000 2.658503000 2.628630000

H -2.738328000 3.542699000 0.151093000

H 3.177464000 1.391628000 -2.552049000

H 1.784812000 3.641865000 -2.048410000

H 1.922603000 4.144771000 0.600837000

H 3.385467000 2.201624000 1.744706000

H 6.100200000 0.195241000 -0.172821000

H 4.398566000 -0.787764000 1.206961000

H 4.380486000 -1.138060000 -1.201754000

H -0.205133000 -2.130757000 3.396070000

H 2.004437000 -2.527730000 2.439152000

H 0.667512000 -4.358712000 3.207214000

H 1.408144000 -4.061812000 -0.476120000

H -0.462073000 -3.991543000 -2.411778000

H -2.703956000 -2.918471000 -1.388072000

H -2.261178000 -2.386725000 1.220550000

N 0.947260000 -1.665993000 -3.719375000

N 0.584135000 -1.581454000 -2.654496000

**B''**

C -0.381990000 0.044859000 1.171138000

H -0.817361000 0.568549000 2.033818000

Ti -0.889974000 -1.034824000 -0.718997000

Si -2.967643000 2.861242000 1.428450000

Si 4.873985000 0.158761000 -0.863389000

Si -4.366057000 -1.372664000 0.747039000

Ti 0.047260000 1.459567000 -0.350738000

C -0.230507000 -1.372867000 1.215501000

C -0.577800000 -2.298292000 2.360878000

H -0.051453000 -2.012694000 3.286130000

H -0.314481000 -3.341818000 2.138092000

H -1.656053000 -2.267039000 2.583803000

C -1.328169000 3.149883000 0.580284000

C -1.140730000 3.435277000 -0.820633000

C 0.229361000 3.726161000 -1.057461000

C 0.920664000 3.601186000 0.182014000

C -0.030710000 3.255779000 1.184460000

C 3.868853000 -0.758415000 0.421709000

C 3.447702000 -0.230140000 1.695925000

C 2.709436000 -1.221032000 2.385308000

C 2.653866000 -2.384563000 1.560759000

C 3.372200000 -2.108200000 0.362990000

C -3.108304000 -1.895543000 -0.535299000

C -2.167110000 -2.983033000 -0.464659000

C -1.477724000 -3.080222000 -1.708364000

C -1.973586000 -2.051237000 -2.562813000

C -2.967174000 -1.330927000 -1.848400000

H 0.845650000 -1.593346000 -1.119145000

Ti 1.541918000 -0.673732000 0.354568000

H -1.374752000 0.669587000 -1.187487000

H 1.788583000 1.104868000 0.025052000

H 6.277625000 -0.336614000 -0.894011000

H 4.892552000 1.603504000 -0.520496000

H 4.303174000 -0.025908000 -2.222910000

H 3.630473000 0.781441000 2.044902000

H 2.228396000 -1.100578000 3.350940000

H 2.142769000 -3.311321000 1.798969000

H 3.501414000 -2.796380000 -0.467383000

H -3.512440000 -0.469621000 -2.221354000

H -1.620216000 -1.827634000 -3.565844000

H -0.694837000 -3.791095000 -1.952124000

H -2.022840000 -3.640172000 0.386114000

H -5.351392000 -2.465678000 0.975523000

H -3.747047000 -1.056291000 2.060004000

H -5.091240000 -0.180404000 0.242964000

H -2.834470000 1.886263000 2.541621000

H -3.963868000 2.377715000 0.441117000

H -3.482363000 4.131032000 2.014423000

H -1.924204000 3.421879000 -1.572819000

H 0.677845000 3.959982000 -2.018278000

H 1.988161000 3.725731000 0.332427000

H 0.197162000 3.079165000 2.231451000

N 1.214396000 0.776576000 -3.242884000

N 0.804041000 0.984831000 -2.203006000

**TS7'**

Ti -0.077557000 1.384895000 -0.753642000

Ti -1.426022000 -0.787872000 0.136471000

Ti 1.423747000 -0.897876000 -0.400117000

Si 0.370243000 2.925274000 2.527938000

Si -5.053981000 -0.376890000 -0.043259000

Si 4.184527000 -0.637413000 2.039496000

N 0.190373000 0.012425000 0.685441000

N -1.801256000 0.696180000 -0.908381000

C -0.317284000 -1.801405000 -1.441647000

H -0.786485000 -2.690868000 -1.874845000

C 0.191083000 -0.720916000 -2.099174000

C -0.176377000 0.267374000 -3.069167000

H -1.230271000 0.750514000 -2.178970000

H -0.896098000 0.021394000 -3.864517000

H 0.609628000 0.953732000 -3.402399000

C 0.273831000 3.218479000 0.678443000

C 1.369634000 3.261469000 -0.247975000

C 0.860213000 3.495289000 -1.552664000

C -0.556426000 3.645603000 -1.452119000

C -0.917286000 3.478765000 -0.093742000

C -3.660792000 -1.384228000 0.695838000

C -3.058476000 -2.564848000 0.147695000

C -2.017022000 -3.004486000 1.016925000

C -1.951147000 -2.104005000 2.113616000

C -2.942271000 -1.101581000 1.910297000

C 3.571227000 -1.367762000 0.428149000

C 2.901104000 -2.630837000 0.245773000

C 2.667235000 -2.838930000 -1.137168000

C 3.181229000 -1.711135000 -1.844063000

C 3.739716000 -0.815268000 -0.888826000

H 1.749449000 0.781950000 -0.916696000

H 3.136377000 -1.554488000 -2.916922000

H 2.150937000 -3.686428000 -1.575432000

H 2.595710000 -3.301759000 1.045280000

H 5.562946000 -1.113171000 2.339939000

H 3.302297000 -1.052535000 3.159545000

H 4.221794000 0.843797000 1.943504000

H 4.209899000 0.135963000 -1.115509000

H -1.931066000 3.482990000 0.292534000

H -1.244402000 3.798933000 -2.278352000

H 1.445145000 3.539235000 -2.467091000

H 2.409524000 3.075845000 -0.000367000

H -0.854801000 2.236690000 3.004792000

H 0.462955000 4.228689000 3.244875000

H 1.578389000 2.134332000 2.862778000

H -1.236475000 -2.135580000 2.930167000

H -1.366946000 -3.857923000 0.849757000

H -3.343680000 -3.041169000 -0.786343000

H -3.117973000 -0.248278000 2.560804000

H -6.373552000 -0.897741000 0.415952000

H -4.951781000 1.037840000 0.393948000

H -5.029236000 -0.466487000 -1.525103000

**H'**

Ti -0.041510000 1.600846000 -0.476903000

Ti -1.412252000 -0.686617000 0.278887000

Ti 1.383156000 -0.768735000 -0.527954000

Si 1.459274000 2.891227000 2.558701000

Si -5.079700000 -0.751915000 -0.441686000

Si 3.664124000 -2.262113000 1.892800000

N 0.260457000 -0.001730000 0.747985000

N -1.894732000 1.050753000 -0.305253000

C -0.561059000 -1.328663000 -1.549103000

H -0.902687000 -2.170203000 -2.160249000

C 0.039387000 -0.197596000 -2.068477000

C -0.044396000 0.949772000 -2.833794000

H -2.750538000 1.601464000 -0.406511000

H -0.896722000 1.170302000 -3.485769000

H 0.876859000 1.502501000 -3.035866000

C 0.713304000 3.321178000 0.893578000

C 1.407854000 3.464700000 -0.360509000

C 0.469192000 3.792753000 -1.374426000

C -0.819249000 3.865688000 -0.773475000

C -0.670476000 3.588485000 0.611908000

C -3.668922000 -1.506298000 0.522460000

C -2.852496000 -2.616717000 0.121130000

C -1.893568000 -2.878459000 1.138420000

C -2.094685000 -1.932796000 2.184836000

C -3.176939000 -1.090006000 1.806966000

C 3.256679000 -1.989919000 0.086618000

C 2.473332000 -2.852837000 -0.766569000

C 2.476866000 -2.322507000 -2.083536000

C 3.230886000 -1.119233000 -2.075969000

C 3.712937000 -0.911467000 -0.749374000

H 1.742525000 0.974966000 -0.804277000

H 3.382886000 -0.454751000 -2.920474000

H 1.938672000 -2.729507000 -2.933464000

H 1.963576000 -3.759383000 -0.452166000

H 4.865390000 -3.128871000 2.042393000

H 2.531438000 -2.937485000 2.579118000

H 3.946957000 -0.962678000 2.553115000

H 4.316086000 -0.070202000 -0.421391000

H -1.478394000 3.529357000 1.334372000

H -1.753098000 4.062254000 -1.290958000

H 0.689886000 3.939895000 -2.426559000

H 2.472354000 3.318994000 -0.508897000

H 0.443795000 2.229504000 3.414165000

H 1.905624000 4.131211000 3.255071000

H 2.645596000 2.018510000 2.382919000

H -1.498523000 -1.840437000 3.087668000

H -1.120877000 -3.640663000 1.106518000

H -2.942859000 -3.158110000 -0.815262000

H -3.550233000 -0.247641000 2.382897000

H -6.389400000 -1.330987000 -0.033476000

H -5.149488000 0.714745000 -0.197826000

H -4.899211000 -1.004074000 -1.894372000

**TS7''**

Ti 0.035437000 1.411778000 -0.602168000

Ti -1.516548000 -0.524875000 0.398720000

Ti 1.221193000 -1.088027000 -0.363595000

Si 1.136398000 3.269587000 2.389695000

Si -5.023977000 -0.266439000 -0.518965000

Si 3.937777000 -1.734243000 1.992636000

N 0.269380000 -0.001541000 0.949833000

N -1.728077000 0.963394000 -0.658830000

C -0.579810000 -1.808210000 -1.105308000

H -1.096567000 -2.683771000 -1.512462000

C -0.369482000 -0.617317000 -1.787148000

C -0.796527000 -0.291756000 -3.207561000

H -1.826757000 -0.619708000 -3.402736000

H -0.122892000 -0.833336000 -3.890874000

H -0.723725000 0.775849000 -3.450689000

C 0.950880000 3.269277000 0.526922000

C 1.945723000 2.883236000 -0.439644000

C 1.406717000 3.052610000 -1.746026000

C 0.085032000 3.576943000 -1.612559000

C -0.200370000 3.703773000 -0.229372000

C -3.812690000 -1.020080000 0.690563000

C -3.150928000 -2.290010000 0.596169000

C -2.284315000 -2.453384000 1.714475000

C -2.374077000 -1.281380000 2.510824000

C -3.304246000 -0.398402000 1.883632000

C 3.322598000 -1.842962000 0.228620000

C 2.634306000 -2.957137000 -0.383153000

C 2.414014000 -2.665908000 -1.752761000

C 2.937552000 -1.365451000 -2.018215000

C 3.503263000 -0.861112000 -0.813740000

H 1.314191000 0.519607000 0.464628000

H 2.895337000 -0.842689000 -2.968924000

H 1.889001000 -3.298202000 -2.461667000

H 2.325264000 -3.866126000 0.125949000

H 5.293045000 -2.336421000 2.123018000

H 3.021222000 -2.474217000 2.898688000

H 4.022262000 -0.312237000 2.411936000

H 4.000302000 0.096852000 -0.702017000

H -1.144342000 4.037717000 0.189704000

H -0.605322000 3.786396000 -2.424649000

H 1.912025000 2.820156000 -2.679572000

H 2.940855000 2.516584000 -0.210235000

H -0.175607000 3.023622000 3.039721000

H 1.641700000 4.586713000 2.869071000

H 2.114955000 2.231403000 2.801233000

H -1.804391000 -1.073325000 3.411269000

H -1.630788000 -3.301510000 1.895262000

H -3.288430000 -3.013429000 -0.202342000

H -3.571491000 0.593766000 2.237002000

H -6.399679000 -0.789778000 -0.278342000

H -5.059096000 1.206443000 -0.350114000

H -4.660602000 -0.619680000 -1.916355000

**H''**

Ti 0.129676000 1.678113000 -0.290575000

Ti -1.641806000 -0.305146000 -0.001886000

Ti 1.179732000 -0.926933000 -0.641116000

Si 1.994689000 2.887726000 2.735288000

Si -5.090552000 0.743444000 -0.217856000

Si 1.943284000 -3.314183000 2.050128000

N 0.211325000 0.013303000 0.858113000

N -1.609426000 1.472325000 -0.516408000

C -0.668553000 -1.306295000 -1.533229000

H -1.048751000 -2.103898000 -2.184722000

C 0.069999000 -0.183940000 -2.078127000

C -0.216751000 0.449164000 -3.418059000

H -0.452796000 -0.326050000 -4.165097000

H 0.625549000 1.047960000 -3.792812000

H -1.095030000 1.110219000 -3.342234000

C 1.791112000 2.980372000 0.879514000

C 2.531201000 2.236644000 -0.102783000

C 2.094342000 2.620699000 -1.400725000

C 1.083414000 3.616039000 -1.249595000

C 0.894680000 3.837678000 0.146456000

C -3.913927000 -0.517292000 0.513435000

C -3.520928000 -1.783580000 -0.047402000

C -2.591435000 -2.407645000 0.824507000

C -2.378397000 -1.537508000 1.932415000

C -3.192153000 -0.384355000 1.748259000

C 2.377732000 -2.683510000 0.349053000

C 1.842800000 -3.138865000 -0.914450000

C 2.482715000 -2.429493000 -1.974357000

C 3.400613000 -1.515816000 -1.390562000

C 3.337149000 -1.662297000 0.023706000

H 0.446593000 -0.118020000 1.848575000

H 4.013117000 -0.797814000 -1.930291000

H 2.277878000 -2.540483000 -3.033992000

H 1.086476000 -3.907137000 -1.037654000

H 2.875193000 -4.382125000 2.505501000

H 0.569324000 -3.881139000 2.044895000

H 2.011943000 -2.207147000 3.042725000

H 3.911461000 -1.086340000 0.745269000

H 0.191023000 4.541381000 0.582455000

H 0.535804000 4.101753000 -2.051951000

H 2.458943000 2.219204000 -2.341701000

H 3.304615000 1.504384000 0.113041000

H 0.695701000 3.149257000 3.408557000

H 2.979108000 3.886908000 3.232085000

H 2.483121000 1.536628000 3.120484000

H -1.703297000 -1.718067000 2.763511000

H -2.087697000 -3.352932000 0.649733000

H -3.863276000 -2.187096000 -0.996238000

H -3.230898000 0.478355000 2.407303000

H -6.503142000 0.350457000 0.055235000

H -4.855148000 2.069732000 0.402523000

H -4.931945000 0.822032000 -1.692603000

**TS10'**

Ti 0.304282000 1.464925000 0.298056000

H 1.953387000 0.888903000 -0.207587000

Ti -1.521414000 -0.663583000 -0.358633000

Ti 1.288393000 -0.824076000 -0.620216000

Si -0.179573000 4.670964000 -1.397269000

Si -4.553218000 -1.494531000 1.585072000

Si 4.290227000 -1.632963000 1.408711000

N -0.202795000 -2.031805000 -0.050438000

N -0.114652000 0.406117000 -1.171422000

C 0.717148000 -0.326432000 1.406995000

H 1.226747000 -0.187090000 2.367111000

C -0.108723000 -1.526339000 1.279448000

C -0.210666000 -2.550554000 2.405537000

H -0.437870000 -2.058757000 3.359437000

H 0.754512000 -3.068520000 2.499217000

H -0.985436000 -3.290234000 2.176271000

C 0.259195000 3.799219000 0.201102000

C 1.573638000 3.424203000 0.646395000

C 1.473411000 2.831356000 1.938562000

C 0.104708000 2.818033000 2.312584000

C -0.643493000 3.400853000 1.250071000

C -3.831342000 -1.171912000 -0.111038000

C -3.249500000 -2.134536000 -1.002954000

C -2.791738000 -1.463776000 -2.168999000

C -3.108788000 -0.077204000 -2.036942000

C -3.739724000 0.102837000 -0.780323000

C 3.491483000 -1.683290000 -0.280993000

C 2.707273000 -2.751366000 -0.838246000

C 2.284754000 -2.386409000 -2.140070000

C 2.812921000 -1.090009000 -2.430012000

C 3.562969000 -0.665698000 -1.301612000

H -4.392426000 -0.299882000 2.451496000

H -6.011323000 -1.793436000 1.493449000

H -3.895401000 -2.672256000 2.206957000

H -3.112864000 -3.190423000 -0.790893000

H -2.260776000 -1.918942000 -3.000147000

H -2.850793000 0.705232000 -2.742885000

H -4.062042000 1.052473000 -0.364526000

H -1.540109000 4.271580000 -1.840680000

H -0.171389000 6.148246000 -1.215402000

H 0.812741000 4.330337000 -2.448622000

H -1.723042000 3.515277000 1.231504000

H -0.309117000 2.390351000 3.220006000

H 2.297789000 2.411523000 2.506958000

H 2.494019000 3.562276000 0.087012000

H 2.415412000 -3.658296000 -0.317971000

H 1.629000000 -2.967674000 -2.781863000

H 2.647906000 -0.519867000 -3.339392000

H 4.082785000 0.281926000 -1.209568000

H 4.331229000 -0.239889000 1.923185000

H 5.691463000 -2.136337000 1.357172000

H 3.535087000 -2.496170000 2.353396000

H -1.462045000 0.849330000 0.711301000

H -1.628316000 -0.932151000 1.397312000

**K'**

Ti 0.312583000 1.445727000 0.265324000

H 1.908599000 0.888925000 -0.363557000

Ti -1.524533000 -0.671892000 -0.402172000

Ti 1.253651000 -0.881170000 -0.640803000

Si -0.277415000 4.649093000 -1.395779000

Si -4.570771000 -1.387278000 1.698782000

Si 4.329352000 -1.416169000 1.383439000

N -0.250334000 -2.030464000 -0.058498000

N -0.188845000 0.375147000 -1.201561000

C 0.820284000 -0.316407000 1.355634000

H 1.472333000 -0.247732000 2.233460000

C -0.181607000 -1.462183000 1.337920000

C -0.023852000 -2.571511000 2.388467000

H -0.109057000 -2.152153000 3.400527000

H 0.966472000 -3.030263000 2.278723000

H -0.789658000 -3.344266000 2.248219000

C 0.274513000 3.776815000 0.166177000

C 1.616767000 3.397941000 0.513526000

C 1.610435000 2.801599000 1.807066000

C 0.273160000 2.792185000 2.282034000

C -0.549741000 3.380439000 1.279325000

C -3.855718000 -1.126185000 -0.011859000

C -3.335612000 -2.130650000 -0.895806000

C -2.915507000 -1.504471000 -2.100122000

C -3.208915000 -0.106542000 -2.002925000

C -3.780154000 0.124358000 -0.728798000

C 3.497700000 -1.631792000 -0.274124000

C 2.740250000 -2.768808000 -0.722092000

C 2.286084000 -2.534521000 -2.041712000

C 2.762646000 -1.250627000 -2.451964000

C 3.518821000 -0.707043000 -1.380345000

H -4.392498000 -0.160981000 2.517927000

H -6.026600000 -1.690246000 1.631954000

H -3.897063000 -2.532917000 2.364208000

H -3.213797000 -3.182794000 -0.658330000

H -2.435380000 -1.997309000 -2.940810000

H -2.975040000 0.646527000 -2.747983000

H -4.071468000 1.091652000 -0.331184000

H -1.661157000 4.238894000 -1.749715000

H -0.272745000 6.126085000 -1.209997000

H 0.645481000 4.321131000 -2.512088000

H -1.627338000 3.499762000 1.340505000

H -0.070990000 2.366032000 3.218577000

H 2.471626000 2.372917000 2.310005000

H 2.493039000 3.531387000 -0.113490000

H 2.487977000 -3.635581000 -0.118988000

H 1.638109000 -3.189550000 -2.616731000

H 2.566312000 -0.768296000 -3.405105000

H 4.008023000 0.261202000 -1.381843000

H 4.290993000 0.006123000 1.813108000

H 5.761589000 -1.825357000 1.328316000

H 3.659165000 -2.264824000 2.402656000

H -1.458113000 0.820064000 0.708241000

H -1.245616000 -1.014461000 1.549511000

**TS13**

Ti 0.104669000 1.298922000 -0.858613000

H -1.529057000 1.264012000 -0.172359000

Ti 1.354549000 -1.029845000 0.419748000

Ti -1.392922000 -0.561857000 0.348731000

Si 0.823023000 3.292184000 2.061816000

Si 4.417508000 -1.235288000 -1.695461000

Si -4.875848000 -0.559777000 -1.007754000

N -0.122320000 -2.013771000 -0.147969000

N 0.307006000 0.421857000 0.857988000

C -1.267754000 -0.495305000 -1.676913000

H -2.018184000 -0.346073000 -2.461391000

C -0.583996000 -1.886197000 -1.599391000

C -1.464131000 -3.064641000 -2.042860000

H -1.686730000 -2.983106000 -3.116793000

H -2.414375000 -3.078312000 -1.495527000

H -0.942953000 -4.014311000 -1.861983000

C 0.539525000 3.333756000 0.210280000

C -0.720394000 3.468975000 -0.460097000

C -0.512701000 3.389357000 -1.870601000

C 0.878791000 3.210694000 -2.096238000

C 1.522483000 3.151700000 -0.826289000

C 3.709658000 -1.407756000 0.027518000

C 3.153197000 -2.584033000 0.633977000

C 2.708424000 -2.252293000 1.943779000

C 3.039516000 -0.879058000 2.189327000

C 3.649082000 -0.367190000 1.026088000

C -3.785210000 -0.705769000 0.500086000

C -3.238420000 -1.903276000 1.077846000

C -2.490661000 -1.563823000 2.234051000

C -2.564508000 -0.149289000 2.406346000

C -3.362098000 0.373683000 1.355970000

H 4.513158000 0.204421000 -2.048256000

H 5.782872000 -1.824434000 -1.782624000

H 3.566368000 -1.937089000 -2.692727000

H 3.030209000 -3.550929000 0.154149000

H 2.221001000 -2.928078000 2.641637000

H 2.808893000 -0.320350000 3.091074000

H 3.964336000 0.661191000 0.876995000

H 2.020178000 2.480087000 2.387606000

H 1.079512000 4.677173000 2.554439000

H -0.381807000 2.789617000 2.764290000

H 2.584432000 2.985382000 -0.669133000

H 1.364597000 3.105482000 -3.060583000

H -1.286351000 3.427129000 -2.632069000

H -1.678468000 3.617166000 0.026026000

H -3.340296000 -2.905364000 0.672163000

H -1.921078000 -2.254817000 2.848485000

H -2.061017000 0.429812000 3.173827000

H -3.593567000 1.423127000 1.204131000

H -4.603864000 0.713194000 -1.725428000

H -6.318783000 -0.563020000 -0.634722000

H -4.646841000 -1.706827000 -1.923782000

H 1.577727000 0.005910000 -1.056130000

H 0.337261000 -1.900568000 -2.210516000

H 0.578399000 0.844142000 -2.621989000

H -0.127264000 0.293113000 -2.433678000

**M**

Ti 0.417592000 1.415433000 -0.344048000

H -1.373722000 1.363075000 -0.171980000

Ti 1.254043000 -1.236961000 0.312690000

Ti -1.464983000 -0.533965000 -0.019810000

Si 0.532482000 4.460813000 1.694245000

Si 4.638515000 -0.636829000 -1.167289000

Si -4.932452000 0.606320000 -0.785595000

N -0.189628000 -2.094725000 -0.370137000

N 0.289438000 0.190090000 1.008624000

C -1.958582000 -1.602920000 -1.871696000

H -2.986794000 -1.957712000 -2.007412000

C -0.953062000 -2.710958000 -1.485930000

C -1.559204000 -4.068225000 -1.096889000

H -2.069609000 -4.510695000 -1.964300000

H -2.288327000 -3.961651000 -0.283907000

H -0.773610000 -4.759884000 -0.761697000

C 0.726230000 3.703229000 -0.008135000

C -0.291723000 3.559179000 -1.016659000

C 0.286533000 2.968491000 -2.177971000

C 1.668944000 2.745769000 -1.912404000

C 1.939204000 3.190847000 -0.590125000

C 3.639391000 -1.511830000 0.151353000

C 3.042581000 -2.819222000 0.064532000

C 2.386434000 -3.106338000 1.288264000

C 2.573091000 -1.986398000 2.159172000

C 3.355096000 -1.022135000 1.471621000

C -3.809288000 -0.186616000 0.483429000

C -3.542591000 -1.590244000 0.619227000

C -2.609163000 -1.787097000 1.667475000

C -2.289684000 -0.505446000 2.210454000

C -3.037135000 0.468135000 1.499389000

H 4.634376000 0.827194000 -0.913631000

H 6.055138000 -1.096861000 -1.153110000

H 4.087969000 -0.914039000 -2.518801000

H 3.053711000 -3.463189000 -0.810585000

H 1.815275000 -4.001745000 1.512276000

H 2.170582000 -1.884295000 3.162840000

H 3.636504000 -0.047157000 1.858057000

H 1.579672000 3.924827000 2.601021000

H 0.680630000 5.940464000 1.635858000

H -0.813347000 4.156004000 2.244485000

H 2.900064000 3.121652000 -0.086565000

H 2.380621000 2.274218000 -2.582180000

H -0.239435000 2.709764000 -3.090836000

H -1.333815000 3.841401000 -0.906955000

H -3.971581000 -2.367924000 -0.002054000

H -2.185222000 -2.735167000 1.981060000

H -1.571305000 -0.304163000 2.996460000

H -2.985978000 1.539180000 1.665575000

H -4.283188000 1.790351000 -1.407824000

H -6.200232000 1.068548000 -0.155869000

H -5.269090000 -0.387818000 -1.835797000

H 1.650582000 0.127559000 -0.927869000

H -0.227773000 -2.887878000 -2.298475000

H -0.424940000 0.355641000 -1.465002000

H -1.634213000 -1.059995000 -2.766193000

**TS14**

Ti -0.153075000 1.412920000 0.264464000

H 1.470378000 1.397122000 -0.457345000

Ti -1.114174000 -1.463660000 -0.173492000

Ti 1.505911000 -0.505679000 -0.520316000

Si -1.705964000 3.956351000 -1.832244000

Si -4.581029000 -0.576926000 0.981396000

Si 4.700856000 0.070267000 1.244282000

N 0.628906000 -2.140250000 0.116748000

N -0.440546000 0.066633000 -0.981332000

C 0.880140000 -0.075886000 1.498462000

H 1.407249000 0.285599000 2.388569000

C 0.509064000 -1.561133000 1.506736000

C 1.149416000 -2.460495000 2.569623000

H 0.886721000 -2.111091000 3.577847000

H 2.240375000 -2.433988000 2.459995000

H 0.810623000 -3.495725000 2.442468000

C -1.009887000 3.535134000 -0.145965000

C 0.351676000 3.706363000 0.294647000

C 0.446237000 3.311657000 1.661064000

C -0.840085000 2.880487000 2.083042000

C -1.733010000 3.010342000 0.983407000

C -3.496139000 -1.725924000 -0.019409000

C -2.902500000 -2.960885000 0.438215000

C -2.191841000 -3.562469000 -0.628968000

C -2.305169000 -2.701852000 -1.762798000

C -3.130419000 -1.595499000 -1.400089000

C 3.870732000 -0.421785000 -0.353723000

C 3.527932000 -1.751498000 -0.784139000

C 2.926884000 -1.686000000 -2.064301000

C 2.889718000 -0.316632000 -2.465456000

C 3.486693000 0.454937000 -1.433206000

H -4.470465000 0.813983000 0.472917000

H -6.012800000 -0.978727000 0.884294000

H -4.194669000 -0.623103000 2.415075000

H -2.975332000 -3.351856000 1.449935000

H -1.602561000 -4.472126000 -0.576204000

H -1.842932000 -2.859671000 -2.733106000

H -3.378615000 -0.758466000 -2.045120000

H -2.880161000 3.096339000 -2.128859000

H -2.152706000 5.375944000 -1.882275000

H -0.667183000 3.768288000 -2.877378000

H -2.784662000 2.739476000 0.990993000

H -1.093066000 2.480054000 3.059619000

H 1.354649000 3.294983000 2.255834000

H 1.169835000 4.079652000 -0.313123000

H 3.639355000 -2.654399000 -0.192062000

H 2.505245000 -2.524141000 -2.611210000

H 2.461743000 0.070003000 -3.385659000

H 3.606382000 1.532702000 -1.441297000

H 4.217958000 1.399904000 1.699605000

H 6.180419000 0.161420000 1.088457000

H 4.425127000 -0.945608000 2.294290000

H -0.607696000 0.285061000 1.540827000

H -0.653005000 -1.583957000 1.749662000

**N**

Ti -0.178713000 1.580511000 0.369281000

H 1.617882000 1.715597000 0.013359000

Ti -0.787909000 -1.443872000 -0.345286000

Ti 1.682295000 -0.155452000 -0.231516000

Si -2.405656000 3.336508000 -1.936680000

Si -4.116815000 -1.801043000 1.353111000

Si 5.206432000 0.060156000 0.965424000

N 0.878966000 -1.799122000 0.520759000

N -0.135644000 0.230907000 -0.928567000

C 0.792850000 0.164047000 1.920132000

H 1.883651000 0.160182000 2.157414000

C 0.312086000 -1.296655000 1.775222000

C 0.529868000 -2.244363000 2.966471000

H 0.014897000 -1.868982000 3.862136000

H 1.605218000 -2.310133000 3.178936000

H 0.159519000 -3.251223000 2.732516000

C -1.735046000 3.237034000 -0.192619000

C -0.567915000 3.905433000 0.321905000

C -0.438763000 3.595696000 1.705663000

C -1.510551000 2.730888000 2.067148000

C -2.305558000 2.507051000 0.911480000

C -3.044525000 -2.167652000 -0.133178000

C -2.203293000 -3.324050000 -0.335899000

C -1.613173000 -3.239473000 -1.626564000

C -2.105721000 -2.051082000 -2.257843000

C -2.985631000 -1.407540000 -1.355125000

C 4.043030000 -0.240097000 -0.466751000

C 3.515144000 -1.504187000 -0.907851000

C 2.710016000 -1.292497000 -2.057285000

C 2.733593000 0.103886000 -2.360486000

C 3.556483000 0.744952000 -1.401707000

H -4.426199000 -0.348192000 1.405971000

H -5.406643000 -2.542190000 1.296684000

H -3.425063000 -2.199049000 2.608313000

H -2.018459000 -4.109103000 0.392238000

H -0.911796000 -3.949096000 -2.056025000

H -1.820053000 -1.683603000 -3.238771000

H -3.477703000 -0.455275000 -1.528376000

H -3.217925000 2.129584000 -2.238424000

H -3.285925000 4.526784000 -2.100723000

H -1.296654000 3.454551000 -2.917700000

H -3.197504000 1.889042000 0.868522000

H -1.681914000 2.300202000 3.049509000

H 0.363481000 3.927616000 2.358948000

H 0.102430000 4.540855000 -0.249486000

H 3.651302000 -2.455383000 -0.403883000

H 2.145220000 -2.051864000 -2.588967000

H 2.174299000 0.594069000 -3.150554000

H 3.749921000 1.811100000 -1.347474000

H 5.061010000 1.458031000 1.448589000

H 6.626579000 -0.146208000 0.569992000

H 4.905595000 -0.878099000 2.079711000

H 0.329393000 0.687675000 2.771279000

H -0.845418000 -1.222549000 1.664113000

**TS15**

Ti -0.275759000 1.326503000 0.401886000

H 1.455065000 0.726531000 0.593299000

Ti -1.293384000 -1.293773000 -0.100764000

Ti 1.415285000 -0.762547000 -0.486463000

Si -0.708825000 4.008145000 -1.953724000

Si -4.752822000 -0.067999000 0.638843000

Si 4.701496000 -0.292417000 1.185933000

N 0.353760000 -2.210546000 0.226519000

N -0.331699000 0.083093000 -0.973473000

C 1.057423000 -0.112678000 1.535464000

H 1.718816000 0.116992000 2.370885000

C 0.392411000 -1.514202000 1.565461000

C 0.937085000 -2.450878000 2.658044000

H 0.830195000 -1.988679000 3.649057000

H 1.999014000 -2.648358000 2.468399000

H 0.392817000 -3.402825000 2.640095000

C -0.443762000 3.526585000 -0.165988000

C 0.823197000 3.368584000 0.512385000

C 0.569228000 3.050679000 1.879378000

C -0.838501000 3.011540000 2.072231000

C -1.464753000 3.294596000 0.830245000

C -3.698518000 -1.393489000 -0.158044000

C -3.234208000 -2.610112000 0.461365000

C -2.470538000 -3.350575000 -0.476363000

C -2.418900000 -2.591468000 -1.683459000

C -3.188075000 -1.403066000 -1.496282000

C 3.783165000 -0.663316000 -0.394874000

C 3.419987000 -1.960961000 -0.903261000

C 2.760282000 -1.800321000 -2.145994000

C 2.713657000 -0.402104000 -2.447458000

C 3.349519000 0.293272000 -1.388093000

H -4.453656000 1.260175000 0.046188000

H -6.200087000 -0.345394000 0.417297000

H -4.517968000 -0.037381000 2.104950000

H -3.427900000 -2.901269000 1.490810000

H -1.952042000 -4.284723000 -0.289085000

H -1.875451000 -2.862467000 -2.584280000

H -3.316930000 -0.613824000 -2.230319000

H -1.988321000 3.441695000 -2.452607000

H -0.776266000 5.488559000 -2.105687000

H 0.419030000 3.519180000 -2.788260000

H -2.536129000 3.311771000 0.652017000

H -1.347473000 2.744838000 2.993854000

H 1.321238000 2.847000000 2.634937000

H 1.802816000 3.502475000 0.064792000

H 3.566706000 -2.905430000 -0.387832000

H 2.321880000 -2.595210000 -2.742839000

H 2.239336000 0.048036000 -3.314181000

H 3.464426000 1.370453000 -1.319860000

H 4.276551000 1.022240000 1.736687000

H 6.173720000 -0.226988000 0.965722000

H 4.444801000 -1.356915000 2.191435000

H -1.737899000 0.212438000 0.931483000

H -0.715917000 -1.315487000 1.845966000

**O**

Ti 0.348285000 1.354832000 0.672725000

H 1.369799000 -1.362807000 1.939348000

Ti -1.667020000 -0.273698000 -0.504004000

Ti 1.039961000 -0.881531000 -0.496667000

Si 1.267560000 4.195553000 -1.287814000

Si -4.935015000 -0.555507000 1.395242000

Si 3.450303000 -3.452317000 0.838206000

N -0.638041000 -1.880314000 -0.309682000

N -0.100582000 0.641030000 -0.996982000

C 0.478546000 -0.774613000 1.647902000

H 0.175954000 -0.218078000 2.552787000

C -0.707547000 -1.667656000 1.162842000

C -0.960892000 -2.977525000 1.926696000

H -1.117084000 -2.778647000 2.996181000

H -0.091096000 -3.636616000 1.811488000

H -1.840798000 -3.491926000 1.520710000

C 1.367461000 3.361009000 0.381018000

C 2.406391000 2.463489000 0.836420000

C 2.125279000 2.087966000 2.176303000

C 0.928589000 2.742555000 2.584475000

C 0.449171000 3.515994000 1.491989000

C -4.069003000 -0.341368000 -0.250910000

C -3.684152000 -1.373007000 -1.172677000

C -3.084245000 -0.766167000 -2.307634000

C -3.130399000 0.656219000 -2.132666000

C -3.731826000 0.913450000 -0.878441000

C 3.048127000 -2.165106000 -0.452920000

C 2.356285000 -2.381971000 -1.698527000

C 2.366714000 -1.162671000 -2.437450000

C 3.061519000 -0.182543000 -1.671606000

C 3.473055000 -0.787928000 -0.458269000

H -4.636844000 0.599230000 2.280210000

H -6.410502000 -0.638595000 1.219517000

H -4.486526000 -1.811676000 2.052852000

H -3.767187000 -2.441856000 -1.002737000

H -2.647443000 -1.290672000 -3.152881000

H -2.726839000 1.396745000 -2.815333000

H -3.864294000 1.892537000 -0.428819000

H -0.147989000 4.349766000 -1.712983000

H 1.872391000 5.557177000 -1.246223000

H 2.014956000 3.400438000 -2.295788000

H -0.445739000 4.131275000 1.495091000

H 0.436462000 2.629007000 3.546928000

H 2.703313000 1.389706000 2.774821000

H 3.268725000 2.150482000 0.258407000

H 1.894573000 -3.312876000 -2.013310000

H 1.889991000 -0.993572000 -3.398941000

H 3.191844000 0.858612000 -1.948067000

H 4.009000000 -0.294386000 0.347177000

H 3.580368000 -2.811231000 2.175240000

H 4.735732000 -4.141511000 0.541422000

H 2.382831000 -4.485091000 0.897952000

H -1.535003000 1.049774000 0.862202000

H -1.623522000 -1.000472000 1.386083000

**TS11'**

Ti 0.433559000 1.369860000 0.714059000

H 1.779135000 0.093061000 0.857065000

Ti -1.707164000 -0.260429000 0.047680000

Ti 0.968451000 -1.266155000 -0.239082000

Si 0.734878000 3.656705000 -2.074787000

Si -5.327521000 -0.463575000 0.810680000

Si 4.641702000 -0.720830000 0.137170000

N -0.773471000 -1.916711000 0.433641000

N 0.066148000 0.349899000 -0.732668000

C -0.398366000 -0.347701000 2.270698000

H 0.472130000 0.332362000 2.525230000

C 0.001732000 -1.661358000 1.611626000

C 0.261703000 -2.835406000 2.547370000

H 1.102853000 -2.619640000 3.223439000

H 0.489714000 -3.749701000 1.985271000

H -0.626070000 -3.040053000 3.173955000

C 0.997159000 3.413118000 -0.234423000

C 2.177976000 2.899047000 0.399625000

C 1.980606000 2.880994000 1.810841000

C 0.676440000 3.381501000 2.076508000

C 0.066589000 3.695746000 0.828778000

C -4.003680000 -0.450393000 -0.512129000

C -3.320692000 -1.581401000 -1.072986000

C -2.404545000 -1.125193000 -2.056177000

C -2.514742000 0.294454000 -2.136863000

C -3.486547000 0.710588000 -1.195602000

C 3.274204000 -1.796158000 -0.543668000

C 2.657005000 -2.916163000 0.123493000

C 1.710265000 -3.507425000 -0.756226000

C 1.707609000 -2.755866000 -1.964207000

C 2.671375000 -1.714669000 -1.843169000

H -5.390266000 0.866398000 1.469041000

H -6.665717000 -0.746608000 0.219359000

H -5.049423000 -1.516188000 1.821344000

H -3.430849000 -2.610780000 -0.747861000

H -1.705133000 -1.743193000 -2.609567000

H -1.904562000 0.945132000 -2.753146000

H -3.762569000 1.738751000 -0.981669000

H -0.688071000 3.428138000 -2.429485000

H 1.081487000 5.051409000 -2.464707000

H 1.612922000 2.731882000 -2.832412000

H -0.938643000 4.083554000 0.700620000

H 0.207773000 3.467186000 3.052767000

H 2.691875000 2.515784000 2.545737000

H 3.066676000 2.544499000 -0.113174000

H 2.882576000 -3.249990000 1.131212000

H 1.051377000 -4.337864000 -0.525465000

H 1.060364000 -2.927923000 -2.820298000

H 2.885048000 -0.960417000 -2.595435000

H 4.585651000 0.637027000 -0.466232000

H 5.979357000 -1.290840000 -0.188571000

H 4.544529000 -0.615796000 1.615473000

H -0.858059000 -0.477931000 3.270832000

H -1.401118000 1.533564000 0.678219000

H -1.752908000 0.070126000 1.934815000

H -2.666808000 0.149180000 1.574547000

**L'**

Ti 0.288528000 1.506962000 0.673665000

H 1.393325000 0.076997000 1.222781000

Ti -1.719077000 -0.375604000 -0.125630000

Ti 1.009999000 -1.152875000 -0.209749000

Si 1.602391000 3.883622000 -1.749671000

Si -5.055507000 -0.600603000 1.321673000

Si 4.344242000 -1.424441000 1.415018000

N -0.789138000 -1.955666000 0.159360000

N 0.059873000 0.486027000 -0.740688000

C 0.315556000 -3.058340000 2.062382000

H 1.114823000 -3.780954000 2.276774000

C 0.038165000 -2.967052000 0.560963000

C -0.035461000 -4.292741000 -0.188150000

H 0.850878000 -4.916428000 -0.004490000

H -0.139965000 -4.131222000 -1.268671000

H -0.916567000 -4.866234000 0.148041000

C 1.017156000 3.612647000 0.008203000

C 1.812235000 3.261767000 1.158078000

C 0.974822000 3.209216000 2.305658000

C -0.355501000 3.509358000 1.892527000

C -0.329635000 3.759590000 0.491755000

C -4.084756000 -0.290293000 -0.246713000

C -3.598086000 -1.274102000 -1.167973000

C -2.826962000 -0.622355000 -2.176679000

C -2.841580000 0.774784000 -1.905200000

C -3.598388000 0.979242000 -0.721932000

C 3.358012000 -1.495575000 -0.177973000

C 2.733205000 -2.637551000 -0.780231000

C 2.093343000 -2.215142000 -1.986272000

C 2.353526000 -0.822286000 -2.162342000

C 3.122301000 -0.381653000 -1.062726000

H -4.763464000 0.445425000 2.333340000

H -6.524231000 -0.540980000 1.045448000

H -4.770064000 -1.954636000 1.857165000

H -3.748277000 -2.346000000 -1.083991000

H -2.301485000 -1.107732000 -2.993706000

H -2.307488000 1.535743000 -2.464892000

H -3.758207000 1.934104000 -0.229526000

H 0.486890000 3.634332000 -2.695883000

H 2.073063000 5.282917000 -1.940032000

H 2.741361000 2.980180000 -2.057883000

H -1.196112000 3.988383000 -0.122503000

H -1.237375000 3.517001000 2.524714000

H 1.288118000 2.942419000 3.310988000

H 2.879398000 3.055066000 1.148354000

H 2.749595000 -3.650825000 -0.394888000

H 1.511606000 -2.843363000 -2.654320000

H 1.961974000 -0.197879000 -2.958062000

H 3.438663000 0.641101000 -0.883368000

H 4.540119000 -0.002757000 1.796387000

H 5.680587000 -2.053050000 1.231986000

H 3.651141000 -2.144880000 2.513411000

H -0.594476000 -3.367629000 2.605006000

H -1.344243000 0.995256000 1.195435000

H 0.602988000 -2.077378000 2.475450000

H -2.369083000 -0.603320000 1.455417000

**TS12'**

Ti 1.700862000 0.120322000 0.678095000

H 0.677629000 -1.380404000 1.261615000

Ti -0.355476000 1.432460000 -0.116369000

Ti -0.627348000 -1.367241000 -0.010926000

Si 3.560231000 -0.766054000 -2.310154000

Si -1.458506000 4.876102000 0.449502000

Si -4.082179000 -2.549104000 -0.644250000

N -1.474254000 -0.040659000 0.911159000

N 0.635592000 -0.223192000 -0.824999000

C 0.103189000 1.254380000 2.124239000

H 0.870130000 0.403861000 2.403148000

C -1.326588000 0.627192000 2.208037000

C -1.528784000 -0.323822000 3.401893000

H -0.809618000 -1.151999000 3.343882000

H -2.545536000 -0.738497000 3.383068000

H -1.385210000 0.212949000 4.351049000

C 3.661574000 -0.516141000 -0.457134000

C 3.422437000 -1.501372000 0.555499000

C 3.556599000 -0.899523000 1.843355000

C 3.882879000 0.469147000 1.647716000

C 3.927916000 0.712460000 0.244984000

C -1.399666000 3.445093000 -0.747690000

C -2.362470000 2.389654000 -0.905530000

C -1.933641000 1.509561000 -1.939538000

C -0.697218000 1.997505000 -2.437191000

C -0.358855000 3.168652000 -1.706636000

C -2.279963000 -3.027846000 -0.482409000

C -1.288477000 -3.097763000 -1.527446000

C -0.058168000 -3.536781000 -0.973106000

C -0.254554000 -3.719398000 0.426852000

C -1.616681000 -3.425599000 0.724435000

H -0.082147000 5.350125000 0.745368000

H -2.228181000 6.029876000 -0.099416000

H -2.128918000 4.464527000 1.713094000

H -3.259141000 2.259188000 -0.305320000

H -2.447734000 0.609220000 -2.261501000

H -0.074968000 1.515505000 -3.183855000

H 0.549556000 3.750456000 -1.830761000

H 3.028523000 0.444784000 -2.981171000

H 4.919352000 -1.026403000 -2.866363000

H 2.721422000 -1.951779000 -2.614192000

H 4.129072000 1.672545000 -0.219716000

H 4.021077000 1.213285000 2.427422000

H 3.420007000 -1.397872000 2.798467000

H 3.148040000 -2.536312000 0.373722000

H -1.452983000 -2.841975000 -2.571308000

H 0.878664000 -3.645815000 -1.510039000

H 0.499300000 -4.032005000 1.142164000

H -2.070979000 -3.456364000 1.710492000

H -4.244468000 -1.431611000 -1.611635000

H -4.614465000 -2.148451000 0.682085000

H -4.891853000 -3.693948000 -1.145594000

H 0.312976000 1.968669000 2.937543000

H 1.477520000 1.869863000 0.077163000

H -2.049520000 1.458062000 2.308900000

H -0.015501000 2.419332000 1.273783000

**References**

1. Shima, T., Hu, S., Luo, G., Kang, X., Luo, Y. & Hou, Z. Dinitrogen cleavage and hydrogenation by a trinuclear titanium polyhydride complex. *Science* **340**, 1549–1552 (2013). [↑](#endnote-ref-1)
2. Jones, N. A., Liddle, S. T., Wilson, C., Arnold, P. L. Titanium(III) alkoxy-N-heterocyclic carbenes and a safe, low-cost route to TiCl3(THF)3. *Organometallics* **26**, 755-757 (2007). [↑](#endnote-ref-2)
3. Constantine, S. P., Hitchcock, P. B., Lawless, G. A. Lima, G. M. D. Synthesis, characterization, and molecular structure of bis{(*tert*-butyldimethylsilyl)- tetramethylcyclopentadienyl}lead. *Chem. Commun.* 1101-1102 (1996). [↑](#endnote-ref-3)
4. . APEX3 v2016.1-0, Bruker AXS Inc., Madison, **2016**. [↑](#endnote-ref-4)
5. . Sheldrick, G. M. SHELXT-Integrated space-group and crystal-structure determination. *Acta Cryst.* **C71**, 3-8 (2015). [↑](#endnote-ref-5)
6. . Dolomanov, O. V., Bourhis, L. J., Gildea, R. J., Howard, J. A. K. & Puschmann, H. OLEX2: a complete structure solution, refinement and analysis program. *J. Appl. Cryst.* **42**, 339-341 (2009). [↑](#endnote-ref-6)
7. . Frisch, M. J., Trucks, G. W., Schlegel, H. B., Scuseria, G. E., Robb, M. A., Cheeseman, J. R., Scalmani, G., Barone, V., Petersson, G. A., Nakatsuji, H., Li, X., Caricato, M., Marenich, A. V., Bloino, J., Janesko, B. G., Gomperts, R., Mennucci, B., Hratchian, H. P., Ortiz, J. V., Izmaylov, A. F., Sonnenberg, J. L., Williams-Young, D., Ding, F., Lipparini, F., Egidi, F., Goings, J., Peng, B., Petrone, A., Henderson, T., Ranasinghe, D., Zakrzewski, V. G., Gao, J., Rega, N., Zheng, G., Liang, W., Hada, M., Ehara, M., Toyota, K., Fukuda, R., Hasegawa, J., Ishida, M., Nakajima, T., Honda, Y., Kitao, O., Nakai, H., Vreven, T., Throssell, K., Montgomery, J. A., Jr., Peralta, J. E., Ogliaro, F., Bearpark, M. J., Heyd, J. J., Brothers, E. N., Kudin, K. N., Staroverov, V. N., Keith, T. A., Kobayashi, R., Normand, J., Raghavachari, K., Rendell, A. P., Burant, J. C., Iyengar, S. S., Tomasi, J., Cossi, M., Millam, J. M., Klene, M., Adamo, C., Cammi, R., Ochterski, J. W., Martin, R. L., Morokuma, K., Farkas, O., Foresman, J. B. & Fox, D. J. *Gaussian 16, Revision B.01*; Gaussian, Inc., Wallingford CT, 2016. [↑](#endnote-ref-7)
8. . Hu, S., Luo, G., Shima, T., Luo, Y. & Hou, Z. Hydrodenitrogenation of pyridines and quinolines at a multinuclear titanium hydride framework. *Nat. Commun.* **8**, 1866 (2017). [↑](#endnote-ref-8)
9. . Kang, X., Luo, G., Luo, L., Hu, S., Luo, Y. & Hou, Z. Mechanistic insights into ring cleavage and contraction of benzene over a titanium hydride cluster. *J. Am. Chem. Soc.* **138**, 11550-11559 (2016). [↑](#endnote-ref-9)
10. . Tao, J., Perdew, J., Staroverov, V. & Scuseria, G. Climbing the density functional ladder: Nonemprical meta-generalized gradient approximation designed for molecules and solids. *Phys. Rev. Lett.* **91**, 146401 (2003). [↑](#endnote-ref-10)
11. . Bühl, M. & Kabrede, H. Geometries of transition-metal complexes from density-functional theory. *J. Chem. Theory Comput.* **2**, 1282−1290 (2006). [↑](#endnote-ref-11)
12. . Zhao, Y. & Truhlar, D. G. Comparative assessment of density functional methods for 3d transition-metal chemistry. *J. Chem. Phys*. **124**, 224105 (2006). [↑](#endnote-ref-12)
13. . Furche, F. & Perdew, J. P. The Performance of semilocal and hybrid density functionals in 3d transition-metal chemistry. *J. Chem. Phys*. **124**, 044103 (2006). [↑](#endnote-ref-13)
14. . Dolg, M., Wedig, U., Stoll, H. & Preuss, H. Energy-adjusted *ab initio* pseudopotentials for the first row transition elements. *J. Chem. Phys.* **86**, 866−872 (1987). [↑](#endnote-ref-14)
15. . Bergner, A., Dolg, M., Küchle, W., Stoll, H. & Preuss, H. *Ab initio* energy-adjusted pseudopotentials for elements of groups 13–17. *Mol. Phys.* **80**, 1431−1441 (1993). [↑](#endnote-ref-15)
16. . Marenich, A. V., Cramer, C. J. & Truhlar, D. G. Universal solvation model based on solute electron density and on a continuum model of the solvent defined by the bulk dielectric constant and atomic surface tensions. *J. Phys. Chem. B* **113**, 6378– 6396 (2009). [↑](#endnote-ref-16)
17. . Grimme, S., Ehrlich, S. & Goerigk, L. Effect of the damping function in dispersion corrected density functional theory. *J. Comput. Chem*. **32**, 1456−1465 (2011). [↑](#endnote-ref-17)
18. . Shima, T., Luo, G., Hu, S., Luo, Y. & Hou, Z. Experimental and computational studies of dinitrogen activation and hydrogenation at a tetranuclear titanium imide/hydride framework. *J. Am. Chem. Soc.* **141**, 2713–2720 (2019). [↑](#endnote-ref-18)
19. . Wang, B., Luo, G., Nishiura, M., Hu, S., Shima, T., Luo, Y. & Hou, Z. Dinitrogen activation by dihydrogen and a PNP-ligated titanium complex. *J. Am. Chem. Soc.* **139**, 1818–1821 (2017). [↑](#endnote-ref-19)
20. . Benson, S. W. The Foundations of Chemical Kinetics; Krieger: Malabar, FL, 1982. [↑](#endnote-ref-20)
21. . Bai, W., Wei, W., Sung, H. H. Y., Williams, I. D., Lin, Z. & Jia, G. Syntheses of Re(V) alkylidyne complexes and ligand effect on the reactivity of Re(V) alkylidyne complexes toward alkynes. *Organometallics* **37**, 559−569 (2018). [↑](#endnote-ref-21)
22. . Liu, Q., Lan, Y.; Liu, J., Li, G., Wu, Y.-D. & Lei, A. Revealing a second transmetalation step in the Negishi coupling and its competition with reductive elimination: Improvement in the interpretation of the mechanism of biaryl syntheses. *J. Am. Chem. Soc.* **131**, 10201–10210 (2009). [↑](#endnote-ref-22)
